# Supplementary material for: Automated annotation of birdsong with a neural network that segments spectrograms
Source: eLife. 2022 Jan 20;11:e63853. doi: 10.7554/eLife.63853 (PMC8860439; doi:10.7554/eLife.63853)
Supplement: Figure 3—source data 1. [file elife-63853-fig3-data1.csv]

	Species	Model	Input to model	animal_id	train_set_dur	mean_seg_err	median_seg_err	std_seg_err
0	Bengalese_Finches	SVM	segmented audio, manually cleaned	bl26lb16	30	1.0446301919764367	1.0556068504965	0.7456802632350523
1	Bengalese_Finches	SVM	segmented audio, manually cleaned	bl26lb16	45	0.5758916958144151	0.503356517065355	0.20942269218189516
2	Bengalese_Finches	SVM	segmented audio, manually cleaned	bl26lb16	75	0.803367655130312	0.36715623535877995	0.9879325992529712
3	Bengalese_Finches	SVM	segmented audio, manually cleaned	bl26lb16	120	0.32234497337045803	0.30117681446448497	0.1368817819955621
4	Bengalese_Finches	SVM	segmented audio, manually cleaned	bl26lb16	180	0.234579448872487	0.254926306339875	0.1052108599370821
5	Bengalese_Finches	SVM	segmented audio, manually cleaned	bl26lb16	480	0.18864593259030898	0.181072406610435	0.052919018535915595
6	Bengalese_Finches	SVM	segmented audio, manually cleaned	bl26lb16	600	0.15877756069286297	0.157222560589455	0.04012147270851789
7	Bengalese_Finches	SVM	segmented audio, manually cleaned	gr41rd51	30	2.5326719538284292	2.30404977779472	0.9194366606715012
8	Bengalese_Finches	SVM	segmented audio, manually cleaned	gr41rd51	45	1.968053846627292	1.907938270425975	0.4043345426289648
9	Bengalese_Finches	SVM	segmented audio, manually cleaned	gr41rd51	75	1.916381203981555	1.8876795828399748	0.25522924830135874
10	Bengalese_Finches	SVM	segmented audio, manually cleaned	gr41rd51	120	1.6370398281838827	1.646952747263555	0.17705091080546448
11	Bengalese_Finches	SVM	segmented audio, manually cleaned	gr41rd51	180	1.639680852952353	1.6311268878107201	0.1746455958932683
12	Bengalese_Finches	SVM	segmented audio, manually cleaned	gr41rd51	480	1.419317218807615	1.4323864153385748	0.19302302697971335
13	Bengalese_Finches	SVM	segmented audio, manually cleaned	gr41rd51	600	1.4894241565368167	1.390829148487235	0.3013268501347616
14	Bengalese_Finches	SVM	segmented audio, manually cleaned	gy6or6	30	0.990594588179867	0.90124085478263	0.45009079687437253
15	Bengalese_Finches	SVM	segmented audio, manually cleaned	gy6or6	45	0.704234743686126	0.7109061523980351	0.30474965910020546
16	Bengalese_Finches	SVM	segmented audio, manually cleaned	gy6or6	75	0.24883768382967805	0.234871277309005	0.12919948993979474
17	Bengalese_Finches	SVM	segmented audio, manually cleaned	gy6or6	120	0.200905171703588	0.15708467142752	0.10827623874896457
18	Bengalese_Finches	SVM	segmented audio, manually cleaned	gy6or6	180	0.118203366718281	0.11943063118309499	0.03268685856406343
19	Bengalese_Finches	SVM	segmented audio, manually cleaned	gy6or6	480	0.087349024484765	0.07384585289514001	0.028509449315611758
20	Bengalese_Finches	SVM	segmented audio, manually cleaned	gy6or6	600	0.084868899901052	0.078167426957745	0.02631876154078005
21	Bengalese_Finches	SVM	segmented audio, manually cleaned	or60yw70	30	0.5942130400643569	0.5890099601240549	0.2860122645367763
22	Bengalese_Finches	SVM	segmented audio, manually cleaned	or60yw70	45	0.406044301588825	0.387649378113565	0.13691836105656396
23	Bengalese_Finches	SVM	segmented audio, manually cleaned	or60yw70	75	0.21736401415479198	0.189031554152105	0.10906770327099058
24	Bengalese_Finches	SVM	segmented audio, manually cleaned	or60yw70	120	0.21174417322850303	0.210848248666165	0.07376723631462682
25	Bengalese_Finches	SVM	segmented audio, manually cleaned	or60yw70	180	0.172197790527489	0.16000553298521	0.09170863774002543
26	Bengalese_Finches	SVM	segmented audio, manually cleaned	or60yw70	480	0.08584653049550299	0.08059896292551	0.0347338827956076
27	Bengalese_Finches	SVM	segmented audio, manually cleaned	or60yw70	600	0.056602813093893	0.05360916320844	0.01653950064188862
28	Bengalese_Finches	SVM	segmented audio, not cleaned	bl26lb16	30	7.103794451445715	7.06609656675863	0.7489151847537646
29	Bengalese_Finches	SVM	segmented audio, not cleaned	bl26lb16	45	6.657471820441904	6.58607211299375	0.2071141720236926
30	Bengalese_Finches	SVM	segmented audio, not cleaned	bl26lb16	75	6.896911018732536	6.42199713497119	1.03001888619069
31	Bengalese_Finches	SVM	segmented audio, not cleaned	bl26lb16	120	6.404015152685703	6.37876160456727	0.1426820799057349
32	Bengalese_Finches	SVM	segmented audio, not cleaned	bl26lb16	180	6.309939952337828	6.3280822242673	0.10185261700759869
33	Bengalese_Finches	SVM	segmented audio, not cleaned	bl26lb16	480	6.268220511066184	6.25532309476288	0.04749553996945754
34	Bengalese_Finches	SVM	segmented audio, not cleaned	bl26lb16	600	6.231933478620283	6.230378478516874	0.04012147270851799
35	Bengalese_Finches	SVM	segmented audio, not cleaned	gr41rd51	30	11.305579023214225	11.042656481929036	0.9835993337226537
36	Bengalese_Finches	SVM	segmented audio, not cleaned	gr41rd51	45	10.587629098258475	10.509631440119335	0.4351933079557706
37	Bengalese_Finches	SVM	segmented audio, not cleaned	gr41rd51	75	10.564822152607993	10.55584591246432	0.28831568817132347
38	Bengalese_Finches	SVM	segmented audio, not cleaned	gr41rd51	120	10.254092465645993	10.226088582663746	0.22219081046001926
39	Bengalese_Finches	SVM	segmented audio, not cleaned	gr41rd51	180	10.283175143710743	10.243273910781344	0.15572274727219018
40	Bengalese_Finches	SVM	segmented audio, not cleaned	gr41rd51	480	10.107479939096423	10.054722936964371	0.18048815177358762
41	Bengalese_Finches	SVM	segmented audio, not cleaned	gr41rd51	600	10.217678922259338	10.103722957210115	0.3312867791173565
42	Bengalese_Finches	SVM	segmented audio, not cleaned	gy6or6	30	5.777234231401704	5.665372811264314	0.5120853021309183
43	Bengalese_Finches	SVM	segmented audio, not cleaned	gy6or6	45	5.544563802386062	5.54506597875788	0.34071288988685455
44	Bengalese_Finches	SVM	segmented audio, not cleaned	gy6or6	75	5.076068709291016	5.054548387834339	0.14836963106344217
45	Bengalese_Finches	SVM	segmented audio, not cleaned	gy6or6	120	4.99335274765367	5.00866843817894	0.18636846972783808
46	Bengalese_Finches	SVM	segmented audio, not cleaned	gy6or6	180	4.925756694739792	4.9353392394888544	0.09869740285505846
47	Bengalese_Finches	SVM	segmented audio, not cleaned	gy6or6	480	4.67819805078263	4.668473100737485	0.08186810941001665
48	Bengalese_Finches	SVM	segmented audio, not cleaned	gy6or6	600	4.735893137453042	4.74368956456148	0.11555646368737704
49	Bengalese_Finches	SVM	segmented audio, not cleaned	or60yw70	30	4.173239980079748	4.121287448326955	0.27182335507655236
50	Bengalese_Finches	SVM	segmented audio, not cleaned	or60yw70	45	4.020238952004552	3.9929416380178004	0.15676869182314357
51	Bengalese_Finches	SVM	segmented audio, not cleaned	or60yw70	75	3.8112484383274152	3.78419756828448	0.11233201114558557
52	Bengalese_Finches	SVM	segmented audio, not cleaned	or60yw70	120	3.816931458580373	3.802682859544265	0.0724336964072137
53	Bengalese_Finches	SVM	segmented audio, not cleaned	or60yw70	180	3.771247503956313	3.7584509821894403	0.10098938090329532
54	Bengalese_Finches	SVM	segmented audio, not cleaned	or60yw70	480	3.7116819582100398	3.70509049964767	0.03050381777739121
55	Bengalese_Finches	SVM	segmented audio, not cleaned	or60yw70	600	3.6709270247517574	3.6878188987889104	0.04093610426196554
56	Bengalese_Finches	SVM	segmented audio, semi-automated cleaning	bl26lb16	30	1.5818003094388629	1.527682063503835	0.7486251544336829
57	Bengalese_Finches	SVM	segmented audio, semi-automated cleaning	bl26lb16	45	1.14324577241004	1.06818306129888	0.2030286858979721
58	Bengalese_Finches	SVM	segmented audio, semi-automated cleaning	bl26lb16	75	1.378579880388685	0.92242310159134	1.029741198742253
59	Bengalese_Finches	SVM	segmented audio, semi-automated cleaning	bl26lb16	120	0.882021010678848	0.860872552872405	0.14114087148620147
60	Bengalese_Finches	SVM	segmented audio, semi-automated cleaning	bl26lb16	180	0.792050900642959	0.810193172572435	0.10185261700759984
61	Bengalese_Finches	SVM	segmented audio, semi-automated cleaning	bl26lb16	480	0.7503314593713191	0.73743404306801	0.04749553996945699
62	Bengalese_Finches	SVM	segmented audio, semi-automated cleaning	bl26lb16	600	0.714044426925416	0.71248942682201	0.04012147270852009
63	Bengalese_Finches	SVM	segmented audio, semi-automated cleaning	gr41rd51	30	3.8858522917850116	3.6423812695085003	0.944042636057446
64	Bengalese_Finches	SVM	segmented audio, semi-automated cleaning	gr41rd51	45	3.3051550136507997	3.190309561760415	0.4011886645712461
65	Bengalese_Finches	SVM	segmented audio, semi-automated cleaning	gr41rd51	75	3.236279565409762	3.19020446728341	0.2611327218055299
66	Bengalese_Finches	SVM	segmented audio, semi-automated cleaning	gr41rd51	120	2.913627191712286	2.888442312182495	0.2192677797130298
67	Bengalese_Finches	SVM	segmented audio, semi-automated cleaning	gr41rd51	180	2.909506891261011	2.883065773523805	0.14306087792428931
68	Bengalese_Finches	SVM	segmented audio, semi-automated cleaning	gr41rd51	480	2.663385391329971	2.663777341930165	0.1650935503404203
69	Bengalese_Finches	SVM	segmented audio, semi-automated cleaning	gr41rd51	600	2.76186427242207	2.63460717102289	0.3255486411389887
70	Bengalese_Finches	SVM	segmented audio, semi-automated cleaning	gy6or6	30	4.155487458396545	4.043626038259155	0.5120853021309182
71	Bengalese_Finches	SVM	segmented audio, semi-automated cleaning	gy6or6	45	3.9228170293809015	3.92331920575272	0.3407128898868545
72	Bengalese_Finches	SVM	segmented audio, semi-automated cleaning	gy6or6	75	3.4576288145927334	3.4404297361549654	0.1475560249542781
73	Bengalese_Finches	SVM	segmented audio, semi-automated cleaning	gy6or6	120	3.3716059746485114	3.386921665173775	0.18636846972783622
74	Bengalese_Finches	SVM	segmented audio, semi-automated cleaning	gy6or6	180	3.3040099217346315	3.313592466483695	0.09869740285505857
75	Bengalese_Finches	SVM	segmented audio, semi-automated cleaning	gy6or6	480	3.05645127777747	3.046726327732325	0.08186810941001707
76	Bengalese_Finches	SVM	segmented audio, semi-automated cleaning	gy6or6	600	3.114146364447882	3.12194279155632	0.1155564636873772
77	Bengalese_Finches	SVM	segmented audio, semi-automated cleaning	or60yw70	30	1.1966332542852993	1.124432788648215	0.27926603110655485
78	Bengalese_Finches	SVM	segmented audio, semi-automated cleaning	or60yw70	45	1.0311322262101048	1.00900020147955	0.15640957710673378
79	Bengalese_Finches	SVM	segmented audio, semi-automated cleaning	or60yw70	75	0.829889646417266	0.81316935488673	0.11338736411198717
80	Bengalese_Finches	SVM	segmented audio, semi-automated cleaning	or60yw70	120	0.835572666670226	0.80582819986552	0.07316409751827947
81	Bengalese_Finches	SVM	segmented audio, semi-automated cleaning	or60yw70	180	0.7847234227899641	0.7615963225106901	0.1032130969943118
82	Bengalese_Finches	SVM	segmented audio, semi-automated cleaning	or60yw70	480	0.725157877043693	0.7199103094737	0.03473388279560759
83	Bengalese_Finches	SVM	segmented audio, semi-automated cleaning	or60yw70	600	0.686985588213511	0.69292050975663	0.03419008142723111
84	Bengalese_Finches	TweetyNet	spectrogram	bl26lb16	30	5.099877039711375	5.322516328923459	2.1769295697864033
85	Bengalese_Finches	TweetyNet	spectrogram	bl26lb16	45	4.2908963382306675	4.5316031526182945	1.6348504184788717
86	Bengalese_Finches	TweetyNet	spectrogram	bl26lb16	75	4.209836675679795	2.07883151208451	4.046699466524558
87	Bengalese_Finches	TweetyNet	spectrogram	bl26lb16	120	1.895989496436286	1.4247315275734	1.1828734840248332
88	Bengalese_Finches	TweetyNet	spectrogram	bl26lb16	180	1.447259936328233	0.95571060614174	1.1098109896684536
89	Bengalese_Finches	TweetyNet	spectrogram	bl26lb16	480	0.42348197558407497	0.39685578834593	0.14150857230122327
90	Bengalese_Finches	TweetyNet	spectrogram	bl26lb16	600	0.6415561186015839	0.560493919064845	0.3211722313576578
91	Bengalese_Finches	TweetyNet	spectrogram	gr41rd51	30	5.9665879956202295	5.691305229690665	1.4212776565235163
92	Bengalese_Finches	TweetyNet	spectrogram	gr41rd51	45	5.3089889922104785	4.9621857119824995	1.4737237649763115
93	Bengalese_Finches	TweetyNet	spectrogram	gr41rd51	75	4.209730523238698	4.2982946018827946	1.03280985057873
94	Bengalese_Finches	TweetyNet	spectrogram	gr41rd51	120	3.290087255770392	2.9607003511540153	0.6738616342093454
95	Bengalese_Finches	TweetyNet	spectrogram	gr41rd51	180	3.1826744982795416	3.0582555589617497	0.5488245522922148
96	Bengalese_Finches	TweetyNet	spectrogram	gr41rd51	480	2.226416801219399	2.236047161106025	0.3606476657451611
97	Bengalese_Finches	TweetyNet	spectrogram	gr41rd51	600	2.1911781892016924	2.06018475275871	0.3913912104235698
98	Bengalese_Finches	TweetyNet	spectrogram	gy6or6	30	4.636627561326561	4.75487481992957	1.0152510678790623
99	Bengalese_Finches	TweetyNet	spectrogram	gy6or6	45	3.7566671194419783	3.69965525195756	1.0029533057389173
100	Bengalese_Finches	TweetyNet	spectrogram	gy6or6	75	2.424615834232676	2.5257117127006303	0.5339939473503414
101	Bengalese_Finches	TweetyNet	spectrogram	gy6or6	120	1.7838037941818399	1.685987302635415	0.3981116211655517
102	Bengalese_Finches	TweetyNet	spectrogram	gy6or6	180	1.48944319111563	1.508527092234835	0.23808825057375277
103	Bengalese_Finches	TweetyNet	spectrogram	gy6or6	480	0.9231907869846088	0.889640518632435	0.25045280321303603
104	Bengalese_Finches	TweetyNet	spectrogram	gy6or6	600	0.8081561322351509	0.8788180942636199	0.16102052740683465
105	Bengalese_Finches	TweetyNet	spectrogram	or60yw70	30	3.681412120530885	3.662354307613585	0.7401275384708932
106	Bengalese_Finches	TweetyNet	spectrogram	or60yw70	45	2.9569960359617253	2.8970688430943348	0.5995275916857143
107	Bengalese_Finches	TweetyNet	spectrogram	or60yw70	75	1.9877385100853828	1.859267875078765	0.3656124522645665
108	Bengalese_Finches	TweetyNet	spectrogram	or60yw70	120	1.9485635678723312	1.855068645463415	0.48592660814792066
109	Bengalese_Finches	TweetyNet	spectrogram	or60yw70	180	1.709438854413601	1.655701809023915	0.3346214281130466
110	Bengalese_Finches	TweetyNet	spectrogram	or60yw70	480	0.9096022758534861	0.944231473102485	0.21930675443999353
111	Bengalese_Finches	TweetyNet	spectrogram	or60yw70	600	0.7138840409175391	0.76058299402333	0.25021914227042963
112	Canaries	SVM	segmented audio, manually cleaned	llb11	190	6.322278003875863	6.22164664049598	1.2297706460632636
113	Canaries	SVM	segmented audio, manually cleaned	llb11	240	6.138751613861736	5.100142755831779	1.913476444110486
114	Canaries	SVM	segmented audio, manually cleaned	llb11	300	5.864681977572076	5.358108551013499	1.600482885261256
115	Canaries	SVM	segmented audio, manually cleaned	llb11	360	4.891097833135218	4.70262064109986	0.9410432855711285
116	Canaries	SVM	segmented audio, manually cleaned	llb11	420	5.459690601740948	5.40229172580027	1.0096820190702407
117	Canaries	SVM	segmented audio, manually cleaned	llb11	480	4.052568844181448	4.15344078181478	0.30095826222602273
118	Canaries	SVM	segmented audio, manually cleaned	llb11	540	3.9212814540613623	3.75531431250251	0.5159747850895813
119	Canaries	SVM	segmented audio, manually cleaned	llb11	600	4.058027959040346	3.8617582310365	0.5444292260967981
120	Canaries	SVM	segmented audio, manually cleaned	llb11	660	3.6182989297417008	3.6642828014910296	0.23643843436150033
121	Canaries	SVM	segmented audio, manually cleaned	llb16	190	8.916128424300338	8.96395110277412	0.7879011164345432
122	Canaries	SVM	segmented audio, manually cleaned	llb16	240	8.331945692742769	7.66087784087397	1.2661689155664506
123	Canaries	SVM	segmented audio, manually cleaned	llb16	300	7.939669124486999	7.137192778173721	1.247796429196401
124	Canaries	SVM	segmented audio, manually cleaned	llb16	360	7.508452517615646	7.600835700809309	0.5097711451884401
125	Canaries	SVM	segmented audio, manually cleaned	llb16	420	6.778956846662085	6.633532684421479	0.6298805799714674
126	Canaries	SVM	segmented audio, manually cleaned	llb16	480	8.123467128247006	7.61488100941532	1.7363994438449597
127	Canaries	SVM	segmented audio, manually cleaned	llb16	540	6.6189408752006775	6.790419235042661	0.6627554571933276
128	Canaries	SVM	segmented audio, manually cleaned	llb16	600	6.15860055851874	6.1519094067777	0.4229827580045453
129	Canaries	SVM	segmented audio, manually cleaned	llb16	660	6.315499826876369	6.03437036112299	0.8286175917751942
130	Canaries	SVM	segmented audio, manually cleaned	llb3	120	6.480071267932748	6.11573769292202	0.8822360335557291
131	Canaries	SVM	segmented audio, manually cleaned	llb3	180	4.787510811797175	4.7565080620816	0.7558534447581843
132	Canaries	SVM	segmented audio, manually cleaned	llb3	240	4.15933434746706	3.5672817198261098	1.270122270081195
133	Canaries	SVM	segmented audio, manually cleaned	llb3	300	3.7237855858082543	3.6632066239616403	0.32504319531837483
134	Canaries	SVM	segmented audio, manually cleaned	llb3	360	3.3017187266844314	3.2539056943459204	0.3835806783308948
135	Canaries	SVM	segmented audio, manually cleaned	llb3	420	3.0728313479729814	3.02169853546917	0.22958355300040892
136	Canaries	SVM	segmented audio, manually cleaned	llb3	480	3.1158607125037725	2.70465886960383	0.7496217609969568
137	Canaries	SVM	segmented audio, manually cleaned	llb3	540	2.638717200671816	2.5003072339514603	0.5107406652942343
138	Canaries	SVM	segmented audio, manually cleaned	llb3	600	2.579698784311666	2.68341861855792	0.23956740506737934
139	Canaries	SVM	segmented audio, manually cleaned	llb3	660	2.485185345253513	2.61896345440514	0.27252624568728084
140	Canaries	SVM	segmented audio, not cleaned	llb11	190	103.91041898253845	103.51278329747504	3.153679528948891
141	Canaries	SVM	segmented audio, not cleaned	llb11	240	102.17920415398319	103.10741300153097	1.8533029628521163
142	Canaries	SVM	segmented audio, not cleaned	llb11	300	102.31492984894443	102.80107408718808	2.1001819577463494
143	Canaries	SVM	segmented audio, not cleaned	llb11	360	101.65684566289292	101.7174838685715	1.940269240391516
144	Canaries	SVM	segmented audio, not cleaned	llb11	420	100.47837161502518	100.22360243571795	1.7576353342868467
145	Canaries	SVM	segmented audio, not cleaned	llb11	480	100.91613188926848	101.56780827265305	2.496867169667582
146	Canaries	SVM	segmented audio, not cleaned	llb11	540	100.11407857459903	99.91012153847517	1.5250600262068548
147	Canaries	SVM	segmented audio, not cleaned	llb11	600	99.15902116781923	99.70178984382669	2.0897226812554375
148	Canaries	SVM	segmented audio, not cleaned	llb11	660	100.64072333925778	102.02778386075839	2.21306530891802
149	Canaries	SVM	segmented audio, not cleaned	llb16	190	17.981396200573023	17.74626784318846	0.7369588944594204
150	Canaries	SVM	segmented audio, not cleaned	llb16	240	17.352354080100742	16.93572415837033	1.1939390728022694
151	Canaries	SVM	segmented audio, not cleaned	llb16	300	17.213626258665037	16.92152177574613	1.099743378418685
152	Canaries	SVM	segmented audio, not cleaned	llb16	360	16.71391740450407	16.727612616209	0.47392162801558935
153	Canaries	SVM	segmented audio, not cleaned	llb16	420	16.20276278843385	16.258564118283083	0.5026462880655873
154	Canaries	SVM	segmented audio, not cleaned	llb16	480	17.17147794281575	16.99920368019951	1.504237915636228
155	Canaries	SVM	segmented audio, not cleaned	llb16	540	16.204176599052094	16.35453730959394	0.5356806036005894
156	Canaries	SVM	segmented audio, not cleaned	llb16	600	15.472438580159865	15.430914764657341	0.43303220599384057
157	Canaries	SVM	segmented audio, not cleaned	llb16	660	15.596359365560076	15.784820667916641	0.7198461833929208
158	Canaries	SVM	segmented audio, not cleaned	llb3	120	30.269737715769605	30.12845724347677	1.0179362695464285
159	Canaries	SVM	segmented audio, not cleaned	llb3	180	28.826228857884807	28.00738473076586	1.6853945513177735
160	Canaries	SVM	segmented audio, not cleaned	llb3	240	27.70454562144218	27.922445310902127	1.6819606177164041
161	Canaries	SVM	segmented audio, not cleaned	llb3	300	27.06233310447356	27.27544222761324	1.380617134124669
162	Canaries	SVM	segmented audio, not cleaned	llb3	360	26.79704282119125	26.786921928707542	1.2737294619411315
163	Canaries	SVM	segmented audio, not cleaned	llb3	420	26.344190665352322	26.01222284074929	1.0417031356908721
164	Canaries	SVM	segmented audio, not cleaned	llb3	480	26.294825040801577	26.025890692157212	1.0477883583989511
165	Canaries	SVM	segmented audio, not cleaned	llb3	540	25.41920122743713	25.044925508689047	1.1358010362605628
166	Canaries	SVM	segmented audio, not cleaned	llb3	600	25.606736624918963	25.565683367366372	0.8583308175752049
167	Canaries	SVM	segmented audio, not cleaned	llb3	660	25.13864758661835	24.99368952600777	1.0474952780263571
168	Canaries	SVM	segmented audio, semi-automated cleaning	llb11	190	64.35107117756436	64.3129867947908	2.7346569359953574
169	Canaries	SVM	segmented audio, semi-automated cleaning	llb11	240	62.85938666171249	63.29409488243354	1.3961194673104025
170	Canaries	SVM	segmented audio, semi-automated cleaning	llb11	300	62.82763097699673	63.42730958901467	1.4704264195608647
171	Canaries	SVM	segmented audio, semi-automated cleaning	llb11	360	62.51026212453366	62.63741313448076	1.7585866552015248
172	Canaries	SVM	segmented audio, semi-automated cleaning	llb11	420	61.43968403857657	61.39306343049225	1.1916694939830534
173	Canaries	SVM	segmented audio, semi-automated cleaning	llb11	480	61.44619480840607	62.32048230157066	1.9102426666580707
174	Canaries	SVM	segmented audio, semi-automated cleaning	llb11	540	60.88091042363851	60.9070633760361	1.2958013759787192
175	Canaries	SVM	segmented audio, semi-automated cleaning	llb11	600	59.97111948436543	60.95573377368022	1.8864550831794995
176	Canaries	SVM	segmented audio, semi-automated cleaning	llb11	660	61.33042089403064	61.97183831669513	1.8840615575647277
177	Canaries	SVM	segmented audio, semi-automated cleaning	llb16	190	14.093525795668679	13.88686242340103	0.6827532507187619
178	Canaries	SVM	segmented audio, semi-automated cleaning	llb16	240	13.620525379094035	13.15819008623526	1.1450621200452322
179	Canaries	SVM	segmented audio, semi-automated cleaning	llb16	300	13.281235643175474	12.91653608402002	1.0178711878267266
180	Canaries	SVM	segmented audio, semi-automated cleaning	llb16	360	12.951992702946239	12.927507264395349	0.4660299463577241
181	Canaries	SVM	segmented audio, semi-automated cleaning	llb16	420	12.51852209127594	12.719223081091998	0.5972893227955552
182	Canaries	SVM	segmented audio, semi-automated cleaning	llb16	480	13.533555810562973	13.350087617540021	1.5087717144019177
183	Canaries	SVM	segmented audio, semi-automated cleaning	llb16	540	12.452021648488003	12.49765949911265	0.48843945644753106
184	Canaries	SVM	segmented audio, semi-automated cleaning	llb16	600	11.739898480349888	11.665717824972429	0.3366221550229858
185	Canaries	SVM	segmented audio, semi-automated cleaning	llb16	660	11.934967923190555	11.91390346526828	0.720842597525323
186	Canaries	SVM	segmented audio, semi-automated cleaning	llb3	120	27.97895579320608	27.851727446784007	1.09630078629164
187	Canaries	SVM	segmented audio, semi-automated cleaning	llb3	180	26.633634031377962	25.76116323335787	1.605659513875755
188	Canaries	SVM	segmented audio, semi-automated cleaning	llb3	240	25.56441490545193	25.83587934636824	1.611204434043253
189	Canaries	SVM	segmented audio, semi-automated cleaning	llb3	300	24.910662431690817	25.03496474383338	1.4028563014152402
190	Canaries	SVM	segmented audio, semi-automated cleaning	llb3	360	24.6704634158134	24.75804237496718	1.2442825124979222
191	Canaries	SVM	segmented audio, semi-automated cleaning	llb3	420	24.25139800053746	23.97282134852301	1.0713162734874309
192	Canaries	SVM	segmented audio, semi-automated cleaning	llb3	480	24.19898404563156	24.05254078212365	1.0222823382507646
193	Canaries	SVM	segmented audio, semi-automated cleaning	llb3	540	23.29658083118725	22.95686372383008	1.0925447657670373
194	Canaries	SVM	segmented audio, semi-automated cleaning	llb3	600	23.493088875496117	23.50082721651028	0.8225698831786932
195	Canaries	SVM	segmented audio, semi-automated cleaning	llb3	660	23.027315404117697	22.90247147953428	1.0312753559668566
196	Canaries	TweetyNet	spectrogram	llb11	190	14.480136856228905	14.16233628277133	2.8786103625452744
197	Canaries	TweetyNet	spectrogram	llb11	240	11.405313378167222	9.02134608223705	7.202060760064024
198	Canaries	TweetyNet	spectrogram	llb11	300	9.4963984451267	7.79522855941545	3.6554912836582587
199	Canaries	TweetyNet	spectrogram	llb11	360	8.33799568380285	8.11424376422012	2.662229070382737
200	Canaries	TweetyNet	spectrogram	llb11	420	9.209683173138178	9.031055429457071	1.5054384574610182
201	Canaries	TweetyNet	spectrogram	llb11	480	7.2808647096110475	6.6559974335456005	1.6390500239651475
202	Canaries	TweetyNet	spectrogram	llb11	540	7.011737504455884	6.53814355335048	1.6294233287029418
203	Canaries	TweetyNet	spectrogram	llb11	600	6.673748140918067	6.25894227946241	0.9787184373130181
204	Canaries	TweetyNet	spectrogram	llb11	660	6.282787480115677	5.53082309636639	2.053996108660634
205	Canaries	TweetyNet	spectrogram	llb16	190	8.073460239474143	7.82894042895774	0.63070518506803
206	Canaries	TweetyNet	spectrogram	llb16	240	6.872140138605703	6.5102890050673405	0.958736695253925
207	Canaries	TweetyNet	spectrogram	llb16	300	6.33135812854899	5.81076341808274	1.4003751911586437
208	Canaries	TweetyNet	spectrogram	llb16	360	6.457077729860376	6.21401595054789	0.7571809098250128
209	Canaries	TweetyNet	spectrogram	llb16	420	6.697930414126623	6.26211059426986	1.8105677881493185
210	Canaries	TweetyNet	spectrogram	llb16	480	6.9085350852249325	6.61319719561361	1.5662070220327722
211	Canaries	TweetyNet	spectrogram	llb16	540	6.027810950667553	6.0535099768373	0.8999589946253062
212	Canaries	TweetyNet	spectrogram	llb16	600	5.470700517299086	5.0132031943433795	1.0356602391120127
213	Canaries	TweetyNet	spectrogram	llb16	660	5.452442499692251	5.09673431925407	1.3038433712066186
214	Canaries	TweetyNet	spectrogram	llb3	120	8.487500951425263	8.75840088811467	1.736530718882379
215	Canaries	TweetyNet	spectrogram	llb3	180	6.729289754271953	6.97143934378809	1.0532553247289427
216	Canaries	TweetyNet	spectrogram	llb3	240	6.023523505463389	5.63277985497849	1.5959437453960426
217	Canaries	TweetyNet	spectrogram	llb3	300	5.254908289908547	5.07017595412241	1.200886281940297
218	Canaries	TweetyNet	spectrogram	llb3	360	5.1160069932394325	5.000214976836189	0.9238823527436695
219	Canaries	TweetyNet	spectrogram	llb3	420	4.835591059527501	4.99938387763126	0.7159459260162833
220	Canaries	TweetyNet	spectrogram	llb3	480	4.102463714477393	3.94484645801738	0.663779496526365
221	Canaries	TweetyNet	spectrogram	llb3	540	4.520996979544116	4.70425633466795	0.5958356861655731
222	Canaries	TweetyNet	spectrogram	llb3	600	4.169370190984198	4.26760280516263	0.8552939366671438
223	Canaries	TweetyNet	spectrogram	llb3	660	3.7860738201047988	3.5391934934401403	0.6855459284005115
