# Supplementary material for: Automated annotation of birdsong with a neural network that segments spectrograms
Source: eLife. 2022 Jan 20;11:e63853. doi: 10.7554/eLife.63853 (PMC8860439; doi:10.7554/eLife.63853)
Supplement: Figure 5—source data 2. [file elife-63853-fig5-data2.csv]

	cleanup	avg_acc	avg_levenshtein	avg_pct_boundary_err	avg_segment_error_rate	train_set_dur	replicate_num	model_name	results_dir	toml_path	training_replicate_csv_path	checkpoint_path	spect_scalar_path	min_segment_dur	avg_error	animal_id	train_set_dur_ind	hyperparam_expt	hyperparam_val	species	Post-processing
2	min_segment_dur_majority_vote	0.9777123717542902	1.3414634146341464	0.6798513250547804	2.66617718131004	75	1	TweetyNet	results/Bengalese_Finches/hidden_size/hidden_size_16/Bird0/results_210531_091317	results/Bengalese_Finches/hidden_size/hidden_size_16/Bird0/results_210531_091317/config_BirdsongRecognition_bird00.toml	data/BirdsongRecognition/Bird0/Wave_prep_210528_224944.csv	results/Bengalese_Finches/hidden_size/hidden_size_16/Bird0/results_210531_091317/train_dur_75s/replicate_1/TweetyNet/checkpoints/max-val-acc-checkpoint.pt	results/Bengalese_Finches/hidden_size/hidden_size_16/Bird0/results_210531_091317/train_dur_75s/replicate_1/StandardizeSpect	0.02	2.2287628245709845	Bird0	2	hidden_size	16	Bengalese Finch	with
3	none	0.9698350918006712	21.853658536585368	0.4848344180871586	41.42153701828405	75	1	TweetyNet	results/Bengalese_Finches/hidden_size/hidden_size_16/Bird0/results_210531_091317	results/Bengalese_Finches/hidden_size/hidden_size_16/Bird0/results_210531_091317/config_BirdsongRecognition_bird00.toml	data/BirdsongRecognition/Bird0/Wave_prep_210528_224944.csv	results/Bengalese_Finches/hidden_size/hidden_size_16/Bird0/results_210531_091317/train_dur_75s/replicate_1/TweetyNet/checkpoints/max-val-acc-checkpoint.pt	results/Bengalese_Finches/hidden_size/hidden_size_16/Bird0/results_210531_091317/train_dur_75s/replicate_1/StandardizeSpect	0.02	3.016490819932882	Bird0	2	hidden_size	16	Bengalese Finch	without
6	min_segment_dur_majority_vote	0.9772133315513434	1.5609756097560976	0.6610031975673456	2.89284051498812	75	2	TweetyNet	results/Bengalese_Finches/hidden_size/hidden_size_16/Bird0/results_210531_091317	results/Bengalese_Finches/hidden_size/hidden_size_16/Bird0/results_210531_091317/config_BirdsongRecognition_bird00.toml	data/BirdsongRecognition/Bird0/Wave_prep_210528_224944.csv	results/Bengalese_Finches/hidden_size/hidden_size_16/Bird0/results_210531_091317/train_dur_75s/replicate_2/TweetyNet/checkpoints/max-val-acc-checkpoint.pt	results/Bengalese_Finches/hidden_size/hidden_size_16/Bird0/results_210531_091317/train_dur_75s/replicate_2/StandardizeSpect	0.02	2.278666844865662	Bird0	2	hidden_size	16	Bengalese Finch	with
7	none	0.9707147051807652	23.5609756097561	0.4951002709814749	43.35998021441374	75	2	TweetyNet	results/Bengalese_Finches/hidden_size/hidden_size_16/Bird0/results_210531_091317	results/Bengalese_Finches/hidden_size/hidden_size_16/Bird0/results_210531_091317/config_BirdsongRecognition_bird00.toml	data/BirdsongRecognition/Bird0/Wave_prep_210528_224944.csv	results/Bengalese_Finches/hidden_size/hidden_size_16/Bird0/results_210531_091317/train_dur_75s/replicate_2/TweetyNet/checkpoints/max-val-acc-checkpoint.pt	results/Bengalese_Finches/hidden_size/hidden_size_16/Bird0/results_210531_091317/train_dur_75s/replicate_2/StandardizeSpect	0.02	2.928529481923492	Bird0	2	hidden_size	16	Bengalese Finch	without
10	min_segment_dur_majority_vote	0.9770556909730576	1.4390243902439024	0.6422216644539774	2.70398788906552	75	3	TweetyNet	results/Bengalese_Finches/hidden_size/hidden_size_16/Bird0/results_210531_091317	results/Bengalese_Finches/hidden_size/hidden_size_16/Bird0/results_210531_091317/config_BirdsongRecognition_bird00.toml	data/BirdsongRecognition/Bird0/Wave_prep_210528_224944.csv	results/Bengalese_Finches/hidden_size/hidden_size_16/Bird0/results_210531_091317/train_dur_75s/replicate_3/TweetyNet/checkpoints/max-val-acc-checkpoint.pt	results/Bengalese_Finches/hidden_size/hidden_size_16/Bird0/results_210531_091317/train_dur_75s/replicate_3/StandardizeSpect	0.02	2.2944309026942333	Bird0	2	hidden_size	16	Bengalese Finch	with
11	none	0.9707565108763246	20.341463414634145	0.500260210064666	35.52887963441662	75	3	TweetyNet	results/Bengalese_Finches/hidden_size/hidden_size_16/Bird0/results_210531_091317	results/Bengalese_Finches/hidden_size/hidden_size_16/Bird0/results_210531_091317/config_BirdsongRecognition_bird00.toml	data/BirdsongRecognition/Bird0/Wave_prep_210528_224944.csv	results/Bengalese_Finches/hidden_size/hidden_size_16/Bird0/results_210531_091317/train_dur_75s/replicate_3/TweetyNet/checkpoints/max-val-acc-checkpoint.pt	results/Bengalese_Finches/hidden_size/hidden_size_16/Bird0/results_210531_091317/train_dur_75s/replicate_3/StandardizeSpect	0.02	2.924348912367536	Bird0	2	hidden_size	16	Bengalese Finch	without
14	min_segment_dur_majority_vote	0.9729019250141154	1.7804878048780488	0.6093342625390009	3.1807563155768	75	4	TweetyNet	results/Bengalese_Finches/hidden_size/hidden_size_16/Bird0/results_210531_091317	results/Bengalese_Finches/hidden_size/hidden_size_16/Bird0/results_210531_091317/config_BirdsongRecognition_bird00.toml	data/BirdsongRecognition/Bird0/Wave_prep_210528_224944.csv	results/Bengalese_Finches/hidden_size/hidden_size_16/Bird0/results_210531_091317/train_dur_75s/replicate_4/TweetyNet/checkpoints/max-val-acc-checkpoint.pt	results/Bengalese_Finches/hidden_size/hidden_size_16/Bird0/results_210531_091317/train_dur_75s/replicate_4/StandardizeSpect	0.02	2.709807498588457	Bird0	2	hidden_size	16	Bengalese Finch	with
15	none	0.9690207553590988	21.902439024390244	0.496721018204333	40.83458889619669	75	4	TweetyNet	results/Bengalese_Finches/hidden_size/hidden_size_16/Bird0/results_210531_091317	results/Bengalese_Finches/hidden_size/hidden_size_16/Bird0/results_210531_091317/config_BirdsongRecognition_bird00.toml	data/BirdsongRecognition/Bird0/Wave_prep_210528_224944.csv	results/Bengalese_Finches/hidden_size/hidden_size_16/Bird0/results_210531_091317/train_dur_75s/replicate_4/TweetyNet/checkpoints/max-val-acc-checkpoint.pt	results/Bengalese_Finches/hidden_size/hidden_size_16/Bird0/results_210531_091317/train_dur_75s/replicate_4/StandardizeSpect	0.02	3.0979244640901182	Bird0	2	hidden_size	16	Bengalese Finch	without
18	min_segment_dur_majority_vote	0.9762249466727404	1.4146341463414631	0.6402581012867433	2.94025652776882	75	5	TweetyNet	results/Bengalese_Finches/hidden_size/hidden_size_16/Bird0/results_210531_091317	results/Bengalese_Finches/hidden_size/hidden_size_16/Bird0/results_210531_091317/config_BirdsongRecognition_bird00.toml	data/BirdsongRecognition/Bird0/Wave_prep_210528_224944.csv	results/Bengalese_Finches/hidden_size/hidden_size_16/Bird0/results_210531_091317/train_dur_75s/replicate_5/TweetyNet/checkpoints/max-val-acc-checkpoint.pt	results/Bengalese_Finches/hidden_size/hidden_size_16/Bird0/results_210531_091317/train_dur_75s/replicate_5/StandardizeSpect	0.02	2.377505332725971	Bird0	2	hidden_size	16	Bengalese Finch	with
19	none	0.9703039250223212	17.829268292682926	0.4998343364624198	34.74345990670471	75	5	TweetyNet	results/Bengalese_Finches/hidden_size/hidden_size_16/Bird0/results_210531_091317	results/Bengalese_Finches/hidden_size/hidden_size_16/Bird0/results_210531_091317/config_BirdsongRecognition_bird00.toml	data/BirdsongRecognition/Bird0/Wave_prep_210528_224944.csv	results/Bengalese_Finches/hidden_size/hidden_size_16/Bird0/results_210531_091317/train_dur_75s/replicate_5/TweetyNet/checkpoints/max-val-acc-checkpoint.pt	results/Bengalese_Finches/hidden_size/hidden_size_16/Bird0/results_210531_091317/train_dur_75s/replicate_5/StandardizeSpect	0.02	2.96960749776789	Bird0	2	hidden_size	16	Bengalese Finch	without
22	min_segment_dur_majority_vote	0.976228989129873	1.5853658536585369	0.6321800113213597	3.35000441171354	75	6	TweetyNet	results/Bengalese_Finches/hidden_size/hidden_size_16/Bird0/results_210531_091317	results/Bengalese_Finches/hidden_size/hidden_size_16/Bird0/results_210531_091317/config_BirdsongRecognition_bird00.toml	data/BirdsongRecognition/Bird0/Wave_prep_210528_224944.csv	results/Bengalese_Finches/hidden_size/hidden_size_16/Bird0/results_210531_091317/train_dur_75s/replicate_6/TweetyNet/checkpoints/max-val-acc-checkpoint.pt	results/Bengalese_Finches/hidden_size/hidden_size_16/Bird0/results_210531_091317/train_dur_75s/replicate_6/StandardizeSpect	0.02	2.3771010870127007	Bird0	2	hidden_size	16	Bengalese Finch	with
23	none	0.9702886773093464	21.951219512195124	0.483560335851605	39.12370491067796	75	6	TweetyNet	results/Bengalese_Finches/hidden_size/hidden_size_16/Bird0/results_210531_091317	results/Bengalese_Finches/hidden_size/hidden_size_16/Bird0/results_210531_091317/config_BirdsongRecognition_bird00.toml	data/BirdsongRecognition/Bird0/Wave_prep_210528_224944.csv	results/Bengalese_Finches/hidden_size/hidden_size_16/Bird0/results_210531_091317/train_dur_75s/replicate_6/TweetyNet/checkpoints/max-val-acc-checkpoint.pt	results/Bengalese_Finches/hidden_size/hidden_size_16/Bird0/results_210531_091317/train_dur_75s/replicate_6/StandardizeSpect	0.02	2.971132269065357	Bird0	2	hidden_size	16	Bengalese Finch	without
26	min_segment_dur_majority_vote	0.9774591157870662	1.3658536585365857	0.65012907595714	2.59233460265011	75	7	TweetyNet	results/Bengalese_Finches/hidden_size/hidden_size_16/Bird0/results_210531_091317	results/Bengalese_Finches/hidden_size/hidden_size_16/Bird0/results_210531_091317/config_BirdsongRecognition_bird00.toml	data/BirdsongRecognition/Bird0/Wave_prep_210528_224944.csv	results/Bengalese_Finches/hidden_size/hidden_size_16/Bird0/results_210531_091317/train_dur_75s/replicate_7/TweetyNet/checkpoints/max-val-acc-checkpoint.pt	results/Bengalese_Finches/hidden_size/hidden_size_16/Bird0/results_210531_091317/train_dur_75s/replicate_7/StandardizeSpect	0.02	2.2540884212933765	Bird0	2	hidden_size	16	Bengalese Finch	with
27	none	0.9719827366628304	19.87804878048781	0.5160975070114081	34.58866582424475	75	7	TweetyNet	results/Bengalese_Finches/hidden_size/hidden_size_16/Bird0/results_210531_091317	results/Bengalese_Finches/hidden_size/hidden_size_16/Bird0/results_210531_091317/config_BirdsongRecognition_bird00.toml	data/BirdsongRecognition/Bird0/Wave_prep_210528_224944.csv	results/Bengalese_Finches/hidden_size/hidden_size_16/Bird0/results_210531_091317/train_dur_75s/replicate_7/TweetyNet/checkpoints/max-val-acc-checkpoint.pt	results/Bengalese_Finches/hidden_size/hidden_size_16/Bird0/results_210531_091317/train_dur_75s/replicate_7/StandardizeSpect	0.02	2.801726333716948	Bird0	2	hidden_size	16	Bengalese Finch	without
30	min_segment_dur_majority_vote	0.9755694762300596	1.6341463414634143	0.6274352576327709	3.25688532897694	75	8	TweetyNet	results/Bengalese_Finches/hidden_size/hidden_size_16/Bird0/results_210531_091317	results/Bengalese_Finches/hidden_size/hidden_size_16/Bird0/results_210531_091317/config_BirdsongRecognition_bird00.toml	data/BirdsongRecognition/Bird0/Wave_prep_210528_224944.csv	results/Bengalese_Finches/hidden_size/hidden_size_16/Bird0/results_210531_091317/train_dur_75s/replicate_8/TweetyNet/checkpoints/max-val-acc-checkpoint.pt	results/Bengalese_Finches/hidden_size/hidden_size_16/Bird0/results_210531_091317/train_dur_75s/replicate_8/StandardizeSpect	0.02	2.443052376994026	Bird0	2	hidden_size	16	Bengalese Finch	with
31	none	0.97223116310058	14.365853658536585	0.5095139050801881	28.87082675790832	75	8	TweetyNet	results/Bengalese_Finches/hidden_size/hidden_size_16/Bird0/results_210531_091317	results/Bengalese_Finches/hidden_size/hidden_size_16/Bird0/results_210531_091317/config_BirdsongRecognition_bird00.toml	data/BirdsongRecognition/Bird0/Wave_prep_210528_224944.csv	results/Bengalese_Finches/hidden_size/hidden_size_16/Bird0/results_210531_091317/train_dur_75s/replicate_8/TweetyNet/checkpoints/max-val-acc-checkpoint.pt	results/Bengalese_Finches/hidden_size/hidden_size_16/Bird0/results_210531_091317/train_dur_75s/replicate_8/StandardizeSpect	0.02	2.776883689942	Bird0	2	hidden_size	16	Bengalese Finch	without
34	min_segment_dur_majority_vote	0.9758880525928078	1.6585365853658536	0.6437774880138976	3.16737959466578	75	9	TweetyNet	results/Bengalese_Finches/hidden_size/hidden_size_16/Bird0/results_210531_091317	results/Bengalese_Finches/hidden_size/hidden_size_16/Bird0/results_210531_091317/config_BirdsongRecognition_bird00.toml	data/BirdsongRecognition/Bird0/Wave_prep_210528_224944.csv	results/Bengalese_Finches/hidden_size/hidden_size_16/Bird0/results_210531_091317/train_dur_75s/replicate_9/TweetyNet/checkpoints/max-val-acc-checkpoint.pt	results/Bengalese_Finches/hidden_size/hidden_size_16/Bird0/results_210531_091317/train_dur_75s/replicate_9/StandardizeSpect	0.02	2.4111947407192247	Bird0	2	hidden_size	16	Bengalese Finch	with
35	none	0.9685223092806736	25.73170731707317	0.4648321115226073	50.01588224182966	75	9	TweetyNet	results/Bengalese_Finches/hidden_size/hidden_size_16/Bird0/results_210531_091317	results/Bengalese_Finches/hidden_size/hidden_size_16/Bird0/results_210531_091317/config_BirdsongRecognition_bird00.toml	data/BirdsongRecognition/Bird0/Wave_prep_210528_224944.csv	results/Bengalese_Finches/hidden_size/hidden_size_16/Bird0/results_210531_091317/train_dur_75s/replicate_9/TweetyNet/checkpoints/max-val-acc-checkpoint.pt	results/Bengalese_Finches/hidden_size/hidden_size_16/Bird0/results_210531_091317/train_dur_75s/replicate_9/StandardizeSpect	0.02	3.147769071932638	Bird0	2	hidden_size	16	Bengalese Finch	without
38	min_segment_dur_majority_vote	0.9772467611899852	1.3658536585365857	0.6682901979106914	2.54494668945753	75	10	TweetyNet	results/Bengalese_Finches/hidden_size/hidden_size_16/Bird0/results_210531_091317	results/Bengalese_Finches/hidden_size/hidden_size_16/Bird0/results_210531_091317/config_BirdsongRecognition_bird00.toml	data/BirdsongRecognition/Bird0/Wave_prep_210528_224944.csv	results/Bengalese_Finches/hidden_size/hidden_size_16/Bird0/results_210531_091317/train_dur_75s/replicate_10/TweetyNet/checkpoints/max-val-acc-checkpoint.pt	results/Bengalese_Finches/hidden_size/hidden_size_16/Bird0/results_210531_091317/train_dur_75s/replicate_10/StandardizeSpect	0.02	2.2753238810014897	Bird0	2	hidden_size	16	Bengalese Finch	with
39	none	0.9718138752166672	18.26829268292683	0.5223888147910996	33.20498089338784	75	10	TweetyNet	results/Bengalese_Finches/hidden_size/hidden_size_16/Bird0/results_210531_091317	results/Bengalese_Finches/hidden_size/hidden_size_16/Bird0/results_210531_091317/config_BirdsongRecognition_bird00.toml	data/BirdsongRecognition/Bird0/Wave_prep_210528_224944.csv	results/Bengalese_Finches/hidden_size/hidden_size_16/Bird0/results_210531_091317/train_dur_75s/replicate_10/TweetyNet/checkpoints/max-val-acc-checkpoint.pt	results/Bengalese_Finches/hidden_size/hidden_size_16/Bird0/results_210531_091317/train_dur_75s/replicate_10/StandardizeSpect	0.02	2.8186124783332933	Bird0	2	hidden_size	16	Bengalese Finch	without
42	min_segment_dur_majority_vote	0.979808883413162	1.0	0.7354547743058742	1.85524437779844	120	1	TweetyNet	results/Bengalese_Finches/hidden_size/hidden_size_16/Bird0/results_210531_091317	results/Bengalese_Finches/hidden_size/hidden_size_16/Bird0/results_210531_091317/config_BirdsongRecognition_bird00.toml	data/BirdsongRecognition/Bird0/Wave_prep_210528_224944.csv	results/Bengalese_Finches/hidden_size/hidden_size_16/Bird0/results_210531_091317/train_dur_120s/replicate_1/TweetyNet/checkpoints/max-val-acc-checkpoint.pt	results/Bengalese_Finches/hidden_size/hidden_size_16/Bird0/results_210531_091317/train_dur_120s/replicate_1/StandardizeSpect	0.02	2.019111658683792	Bird0	3	hidden_size	16	Bengalese Finch	with
43	none	0.9751675488309802	15.317073170731708	0.5703565409311498	29.31317239867928	120	1	TweetyNet	results/Bengalese_Finches/hidden_size/hidden_size_16/Bird0/results_210531_091317	results/Bengalese_Finches/hidden_size/hidden_size_16/Bird0/results_210531_091317/config_BirdsongRecognition_bird00.toml	data/BirdsongRecognition/Bird0/Wave_prep_210528_224944.csv	results/Bengalese_Finches/hidden_size/hidden_size_16/Bird0/results_210531_091317/train_dur_120s/replicate_1/TweetyNet/checkpoints/max-val-acc-checkpoint.pt	results/Bengalese_Finches/hidden_size/hidden_size_16/Bird0/results_210531_091317/train_dur_120s/replicate_1/StandardizeSpect	0.02	2.4832451169019776	Bird0	3	hidden_size	16	Bengalese Finch	without
46	min_segment_dur_majority_vote	0.9775933531679594	1.2926829268292683	0.6586622268562027	2.46172033146398	120	2	TweetyNet	results/Bengalese_Finches/hidden_size/hidden_size_16/Bird0/results_210531_091317	results/Bengalese_Finches/hidden_size/hidden_size_16/Bird0/results_210531_091317/config_BirdsongRecognition_bird00.toml	data/BirdsongRecognition/Bird0/Wave_prep_210528_224944.csv	results/Bengalese_Finches/hidden_size/hidden_size_16/Bird0/results_210531_091317/train_dur_120s/replicate_2/TweetyNet/checkpoints/max-val-acc-checkpoint.pt	results/Bengalese_Finches/hidden_size/hidden_size_16/Bird0/results_210531_091317/train_dur_120s/replicate_2/StandardizeSpect	0.02	2.240664683204064	Bird0	3	hidden_size	16	Bengalese Finch	with
47	none	0.9740519800633096	13.707317073170731	0.5554656473537603	24.37661268382671	120	2	TweetyNet	results/Bengalese_Finches/hidden_size/hidden_size_16/Bird0/results_210531_091317	results/Bengalese_Finches/hidden_size/hidden_size_16/Bird0/results_210531_091317/config_BirdsongRecognition_bird00.toml	data/BirdsongRecognition/Bird0/Wave_prep_210528_224944.csv	results/Bengalese_Finches/hidden_size/hidden_size_16/Bird0/results_210531_091317/train_dur_120s/replicate_2/TweetyNet/checkpoints/max-val-acc-checkpoint.pt	results/Bengalese_Finches/hidden_size/hidden_size_16/Bird0/results_210531_091317/train_dur_120s/replicate_2/StandardizeSpect	0.02	2.594801993669038	Bird0	3	hidden_size	16	Bengalese Finch	without
50	min_segment_dur_majority_vote	0.9790864380369412	1.2439024390243902	0.6982378109224837	2.3007528981753502	120	3	TweetyNet	results/Bengalese_Finches/hidden_size/hidden_size_16/Bird0/results_210531_091317	results/Bengalese_Finches/hidden_size/hidden_size_16/Bird0/results_210531_091317/config_BirdsongRecognition_bird00.toml	data/BirdsongRecognition/Bird0/Wave_prep_210528_224944.csv	results/Bengalese_Finches/hidden_size/hidden_size_16/Bird0/results_210531_091317/train_dur_120s/replicate_3/TweetyNet/checkpoints/max-val-acc-checkpoint.pt	results/Bengalese_Finches/hidden_size/hidden_size_16/Bird0/results_210531_091317/train_dur_120s/replicate_3/StandardizeSpect	0.02	2.091356196305893	Bird0	3	hidden_size	16	Bengalese Finch	with
51	none	0.9745110668887608	14.317073170731708	0.5516259816205241	26.81200276642362	120	3	TweetyNet	results/Bengalese_Finches/hidden_size/hidden_size_16/Bird0/results_210531_091317	results/Bengalese_Finches/hidden_size/hidden_size_16/Bird0/results_210531_091317/config_BirdsongRecognition_bird00.toml	data/BirdsongRecognition/Bird0/Wave_prep_210528_224944.csv	results/Bengalese_Finches/hidden_size/hidden_size_16/Bird0/results_210531_091317/train_dur_120s/replicate_3/TweetyNet/checkpoints/max-val-acc-checkpoint.pt	results/Bengalese_Finches/hidden_size/hidden_size_16/Bird0/results_210531_091317/train_dur_120s/replicate_3/StandardizeSpect	0.02	2.548893311123912	Bird0	3	hidden_size	16	Bengalese Finch	without
54	min_segment_dur_majority_vote	0.977577379156512	1.4390243902439024	0.6396629608991437	2.89769077841137	120	4	TweetyNet	results/Bengalese_Finches/hidden_size/hidden_size_16/Bird0/results_210531_091317	results/Bengalese_Finches/hidden_size/hidden_size_16/Bird0/results_210531_091317/config_BirdsongRecognition_bird00.toml	data/BirdsongRecognition/Bird0/Wave_prep_210528_224944.csv	results/Bengalese_Finches/hidden_size/hidden_size_16/Bird0/results_210531_091317/train_dur_120s/replicate_4/TweetyNet/checkpoints/max-val-acc-checkpoint.pt	results/Bengalese_Finches/hidden_size/hidden_size_16/Bird0/results_210531_091317/train_dur_120s/replicate_4/StandardizeSpect	0.02	2.242262084348812	Bird0	3	hidden_size	16	Bengalese Finch	with
55	none	0.9743361107660868	13.121951219512194	0.5450610111078585	23.73443429003902	120	4	TweetyNet	results/Bengalese_Finches/hidden_size/hidden_size_16/Bird0/results_210531_091317	results/Bengalese_Finches/hidden_size/hidden_size_16/Bird0/results_210531_091317/config_BirdsongRecognition_bird00.toml	data/BirdsongRecognition/Bird0/Wave_prep_210528_224944.csv	results/Bengalese_Finches/hidden_size/hidden_size_16/Bird0/results_210531_091317/train_dur_120s/replicate_4/TweetyNet/checkpoints/max-val-acc-checkpoint.pt	results/Bengalese_Finches/hidden_size/hidden_size_16/Bird0/results_210531_091317/train_dur_120s/replicate_4/StandardizeSpect	0.02	2.566388923391328	Bird0	3	hidden_size	16	Bengalese Finch	without
58	min_segment_dur_majority_vote	0.9776173361598692	1.3902439024390243	0.6811462075986952	2.49541727565032	120	5	TweetyNet	results/Bengalese_Finches/hidden_size/hidden_size_16/Bird0/results_210531_091317	results/Bengalese_Finches/hidden_size/hidden_size_16/Bird0/results_210531_091317/config_BirdsongRecognition_bird00.toml	data/BirdsongRecognition/Bird0/Wave_prep_210528_224944.csv	results/Bengalese_Finches/hidden_size/hidden_size_16/Bird0/results_210531_091317/train_dur_120s/replicate_5/TweetyNet/checkpoints/max-val-acc-checkpoint.pt	results/Bengalese_Finches/hidden_size/hidden_size_16/Bird0/results_210531_091317/train_dur_120s/replicate_5/StandardizeSpect	0.02	2.238266384013088	Bird0	3	hidden_size	16	Bengalese Finch	with
59	none	0.9718005978654396	16.170731707317074	0.5249491951587634	28.26946612976559	120	5	TweetyNet	results/Bengalese_Finches/hidden_size/hidden_size_16/Bird0/results_210531_091317	results/Bengalese_Finches/hidden_size/hidden_size_16/Bird0/results_210531_091317/config_BirdsongRecognition_bird00.toml	data/BirdsongRecognition/Bird0/Wave_prep_210528_224944.csv	results/Bengalese_Finches/hidden_size/hidden_size_16/Bird0/results_210531_091317/train_dur_120s/replicate_5/TweetyNet/checkpoints/max-val-acc-checkpoint.pt	results/Bengalese_Finches/hidden_size/hidden_size_16/Bird0/results_210531_091317/train_dur_120s/replicate_5/StandardizeSpect	0.02	2.8199402134560514	Bird0	3	hidden_size	16	Bengalese Finch	without
62	min_segment_dur_majority_vote	0.9781037876890742	1.2926829268292683	0.6709369873257373	2.6578404904627098	120	6	TweetyNet	results/Bengalese_Finches/hidden_size/hidden_size_16/Bird0/results_210531_091317	results/Bengalese_Finches/hidden_size/hidden_size_16/Bird0/results_210531_091317/config_BirdsongRecognition_bird00.toml	data/BirdsongRecognition/Bird0/Wave_prep_210528_224944.csv	results/Bengalese_Finches/hidden_size/hidden_size_16/Bird0/results_210531_091317/train_dur_120s/replicate_6/TweetyNet/checkpoints/max-val-acc-checkpoint.pt	results/Bengalese_Finches/hidden_size/hidden_size_16/Bird0/results_210531_091317/train_dur_120s/replicate_6/StandardizeSpect	0.02	2.189621231092576	Bird0	3	hidden_size	16	Bengalese Finch	with
63	none	0.9748373411704668	11.048780487804878	0.5685543112990954	20.38847764041932	120	6	TweetyNet	results/Bengalese_Finches/hidden_size/hidden_size_16/Bird0/results_210531_091317	results/Bengalese_Finches/hidden_size/hidden_size_16/Bird0/results_210531_091317/config_BirdsongRecognition_bird00.toml	data/BirdsongRecognition/Bird0/Wave_prep_210528_224944.csv	results/Bengalese_Finches/hidden_size/hidden_size_16/Bird0/results_210531_091317/train_dur_120s/replicate_6/TweetyNet/checkpoints/max-val-acc-checkpoint.pt	results/Bengalese_Finches/hidden_size/hidden_size_16/Bird0/results_210531_091317/train_dur_120s/replicate_6/StandardizeSpect	0.02	2.516265882953317	Bird0	3	hidden_size	16	Bengalese Finch	without
66	min_segment_dur_majority_vote	0.9809510430675018	1.024390243902439	0.7305057737720827	1.93126657356503	120	7	TweetyNet	results/Bengalese_Finches/hidden_size/hidden_size_16/Bird0/results_210531_091317	results/Bengalese_Finches/hidden_size/hidden_size_16/Bird0/results_210531_091317/config_BirdsongRecognition_bird00.toml	data/BirdsongRecognition/Bird0/Wave_prep_210528_224944.csv	results/Bengalese_Finches/hidden_size/hidden_size_16/Bird0/results_210531_091317/train_dur_120s/replicate_7/TweetyNet/checkpoints/max-val-acc-checkpoint.pt	results/Bengalese_Finches/hidden_size/hidden_size_16/Bird0/results_210531_091317/train_dur_120s/replicate_7/StandardizeSpect	0.02	1.90489569324982	Bird0	3	hidden_size	16	Bengalese Finch	with
67	none	0.9762987038452392	14.78048780487805	0.5718286710470015	27.9059227066483	120	7	TweetyNet	results/Bengalese_Finches/hidden_size/hidden_size_16/Bird0/results_210531_091317	results/Bengalese_Finches/hidden_size/hidden_size_16/Bird0/results_210531_091317/config_BirdsongRecognition_bird00.toml	data/BirdsongRecognition/Bird0/Wave_prep_210528_224944.csv	results/Bengalese_Finches/hidden_size/hidden_size_16/Bird0/results_210531_091317/train_dur_120s/replicate_7/TweetyNet/checkpoints/max-val-acc-checkpoint.pt	results/Bengalese_Finches/hidden_size/hidden_size_16/Bird0/results_210531_091317/train_dur_120s/replicate_7/StandardizeSpect	0.02	2.37012961547608	Bird0	3	hidden_size	16	Bengalese Finch	without
70	min_segment_dur_majority_vote	0.9776850720811856	1.2439024390243902	0.6608326818113675	2.77468576756884	120	8	TweetyNet	results/Bengalese_Finches/hidden_size/hidden_size_16/Bird0/results_210531_091317	results/Bengalese_Finches/hidden_size/hidden_size_16/Bird0/results_210531_091317/config_BirdsongRecognition_bird00.toml	data/BirdsongRecognition/Bird0/Wave_prep_210528_224944.csv	results/Bengalese_Finches/hidden_size/hidden_size_16/Bird0/results_210531_091317/train_dur_120s/replicate_8/TweetyNet/checkpoints/max-val-acc-checkpoint.pt	results/Bengalese_Finches/hidden_size/hidden_size_16/Bird0/results_210531_091317/train_dur_120s/replicate_8/StandardizeSpect	0.02	2.231492791881451	Bird0	3	hidden_size	16	Bengalese Finch	with
71	none	0.973995148362331	13.585365853658535	0.5289752110052717	27.11921592976671	120	8	TweetyNet	results/Bengalese_Finches/hidden_size/hidden_size_16/Bird0/results_210531_091317	results/Bengalese_Finches/hidden_size/hidden_size_16/Bird0/results_210531_091317/config_BirdsongRecognition_bird00.toml	data/BirdsongRecognition/Bird0/Wave_prep_210528_224944.csv	results/Bengalese_Finches/hidden_size/hidden_size_16/Bird0/results_210531_091317/train_dur_120s/replicate_8/TweetyNet/checkpoints/max-val-acc-checkpoint.pt	results/Bengalese_Finches/hidden_size/hidden_size_16/Bird0/results_210531_091317/train_dur_120s/replicate_8/StandardizeSpect	0.02	2.600485163766897	Bird0	3	hidden_size	16	Bengalese Finch	without
74	min_segment_dur_majority_vote	0.9775977145606112	1.2439024390243902	0.6638074145002764	2.41033119617814	120	9	TweetyNet	results/Bengalese_Finches/hidden_size/hidden_size_16/Bird0/results_210531_091317	results/Bengalese_Finches/hidden_size/hidden_size_16/Bird0/results_210531_091317/config_BirdsongRecognition_bird00.toml	data/BirdsongRecognition/Bird0/Wave_prep_210528_224944.csv	results/Bengalese_Finches/hidden_size/hidden_size_16/Bird0/results_210531_091317/train_dur_120s/replicate_9/TweetyNet/checkpoints/max-val-acc-checkpoint.pt	results/Bengalese_Finches/hidden_size/hidden_size_16/Bird0/results_210531_091317/train_dur_120s/replicate_9/StandardizeSpect	0.02	2.2402285439388936	Bird0	3	hidden_size	16	Bengalese Finch	with
75	none	0.9737374117412982	12.268292682926829	0.5479973419873828	23.99062703324896	120	9	TweetyNet	results/Bengalese_Finches/hidden_size/hidden_size_16/Bird0/results_210531_091317	results/Bengalese_Finches/hidden_size/hidden_size_16/Bird0/results_210531_091317/config_BirdsongRecognition_bird00.toml	data/BirdsongRecognition/Bird0/Wave_prep_210528_224944.csv	results/Bengalese_Finches/hidden_size/hidden_size_16/Bird0/results_210531_091317/train_dur_120s/replicate_9/TweetyNet/checkpoints/max-val-acc-checkpoint.pt	results/Bengalese_Finches/hidden_size/hidden_size_16/Bird0/results_210531_091317/train_dur_120s/replicate_9/StandardizeSpect	0.02	2.626258825870176	Bird0	3	hidden_size	16	Bengalese Finch	without
78	min_segment_dur_majority_vote	0.979022988725064	1.2682926829268293	0.6744367803769803	2.3978668267253	120	10	TweetyNet	results/Bengalese_Finches/hidden_size/hidden_size_16/Bird0/results_210531_091317	results/Bengalese_Finches/hidden_size/hidden_size_16/Bird0/results_210531_091317/config_BirdsongRecognition_bird00.toml	data/BirdsongRecognition/Bird0/Wave_prep_210528_224944.csv	results/Bengalese_Finches/hidden_size/hidden_size_16/Bird0/results_210531_091317/train_dur_120s/replicate_10/TweetyNet/checkpoints/max-val-acc-checkpoint.pt	results/Bengalese_Finches/hidden_size/hidden_size_16/Bird0/results_210531_091317/train_dur_120s/replicate_10/StandardizeSpect	0.02	2.0977011274935897	Bird0	3	hidden_size	16	Bengalese Finch	with
79	none	0.9756408313727828	12.78048780487805	0.5602185118075784	23.5377105448596	120	10	TweetyNet	results/Bengalese_Finches/hidden_size/hidden_size_16/Bird0/results_210531_091317	results/Bengalese_Finches/hidden_size/hidden_size_16/Bird0/results_210531_091317/config_BirdsongRecognition_bird00.toml	data/BirdsongRecognition/Bird0/Wave_prep_210528_224944.csv	results/Bengalese_Finches/hidden_size/hidden_size_16/Bird0/results_210531_091317/train_dur_120s/replicate_10/TweetyNet/checkpoints/max-val-acc-checkpoint.pt	results/Bengalese_Finches/hidden_size/hidden_size_16/Bird0/results_210531_091317/train_dur_120s/replicate_10/StandardizeSpect	0.02	2.435916862721732	Bird0	3	hidden_size	16	Bengalese Finch	without
82	min_segment_dur_majority_vote	0.9834597978012248	0.8536585365853658	0.7521732254532645	1.44579732614066	600	1	TweetyNet	results/Bengalese_Finches/hidden_size/hidden_size_16/Bird0/results_210531_091317	results/Bengalese_Finches/hidden_size/hidden_size_16/Bird0/results_210531_091317/config_BirdsongRecognition_bird00.toml	data/BirdsongRecognition/Bird0/Wave_prep_210528_224944.csv	results/Bengalese_Finches/hidden_size/hidden_size_16/Bird0/results_210531_091317/train_dur_600s/replicate_1/TweetyNet/checkpoints/max-val-acc-checkpoint.pt	results/Bengalese_Finches/hidden_size/hidden_size_16/Bird0/results_210531_091317/train_dur_600s/replicate_1/StandardizeSpect	0.02	1.6540202198775278	Bird0	6	hidden_size	16	Bengalese Finch	with
83	none	0.980832950550706	10.634146341463415	0.6356952460055718	18.13343080693054	600	1	TweetyNet	results/Bengalese_Finches/hidden_size/hidden_size_16/Bird0/results_210531_091317	results/Bengalese_Finches/hidden_size/hidden_size_16/Bird0/results_210531_091317/config_BirdsongRecognition_bird00.toml	data/BirdsongRecognition/Bird0/Wave_prep_210528_224944.csv	results/Bengalese_Finches/hidden_size/hidden_size_16/Bird0/results_210531_091317/train_dur_600s/replicate_1/TweetyNet/checkpoints/max-val-acc-checkpoint.pt	results/Bengalese_Finches/hidden_size/hidden_size_16/Bird0/results_210531_091317/train_dur_600s/replicate_1/StandardizeSpect	0.02	1.916704944929415	Bird0	6	hidden_size	16	Bengalese Finch	without
86	min_segment_dur_majority_vote	0.98156466821038	1.1219512195121952	0.7139267628181385	2.06495818624709	600	2	TweetyNet	results/Bengalese_Finches/hidden_size/hidden_size_16/Bird0/results_210531_091317	results/Bengalese_Finches/hidden_size/hidden_size_16/Bird0/results_210531_091317/config_BirdsongRecognition_bird00.toml	data/BirdsongRecognition/Bird0/Wave_prep_210528_224944.csv	results/Bengalese_Finches/hidden_size/hidden_size_16/Bird0/results_210531_091317/train_dur_600s/replicate_2/TweetyNet/checkpoints/max-val-acc-checkpoint.pt	results/Bengalese_Finches/hidden_size/hidden_size_16/Bird0/results_210531_091317/train_dur_600s/replicate_2/StandardizeSpect	0.02	1.843533178961998	Bird0	6	hidden_size	16	Bengalese Finch	with
87	none	0.9795870062585356	9.268292682926829	0.6163603164829178	17.49482613462331	600	2	TweetyNet	results/Bengalese_Finches/hidden_size/hidden_size_16/Bird0/results_210531_091317	results/Bengalese_Finches/hidden_size/hidden_size_16/Bird0/results_210531_091317/config_BirdsongRecognition_bird00.toml	data/BirdsongRecognition/Bird0/Wave_prep_210528_224944.csv	results/Bengalese_Finches/hidden_size/hidden_size_16/Bird0/results_210531_091317/train_dur_600s/replicate_2/TweetyNet/checkpoints/max-val-acc-checkpoint.pt	results/Bengalese_Finches/hidden_size/hidden_size_16/Bird0/results_210531_091317/train_dur_600s/replicate_2/StandardizeSpect	0.02	2.041299374146444	Bird0	6	hidden_size	16	Bengalese Finch	without
90	min_segment_dur_majority_vote	0.9843250687203712	0.7073170731707317	0.7818803722865443	1.38429004900674	600	3	TweetyNet	results/Bengalese_Finches/hidden_size/hidden_size_16/Bird0/results_210531_091317	results/Bengalese_Finches/hidden_size/hidden_size_16/Bird0/results_210531_091317/config_BirdsongRecognition_bird00.toml	data/BirdsongRecognition/Bird0/Wave_prep_210528_224944.csv	results/Bengalese_Finches/hidden_size/hidden_size_16/Bird0/results_210531_091317/train_dur_600s/replicate_3/TweetyNet/checkpoints/max-val-acc-checkpoint.pt	results/Bengalese_Finches/hidden_size/hidden_size_16/Bird0/results_210531_091317/train_dur_600s/replicate_3/StandardizeSpect	0.02	1.5674931279628712	Bird0	6	hidden_size	16	Bengalese Finch	with
91	none	0.9817401687402416	8.731707317073171	0.6534952146570765	16.94737448348697	600	3	TweetyNet	results/Bengalese_Finches/hidden_size/hidden_size_16/Bird0/results_210531_091317	results/Bengalese_Finches/hidden_size/hidden_size_16/Bird0/results_210531_091317/config_BirdsongRecognition_bird00.toml	data/BirdsongRecognition/Bird0/Wave_prep_210528_224944.csv	results/Bengalese_Finches/hidden_size/hidden_size_16/Bird0/results_210531_091317/train_dur_600s/replicate_3/TweetyNet/checkpoints/max-val-acc-checkpoint.pt	results/Bengalese_Finches/hidden_size/hidden_size_16/Bird0/results_210531_091317/train_dur_600s/replicate_3/StandardizeSpect	0.02	1.8259831259758497	Bird0	6	hidden_size	16	Bengalese Finch	without
94	min_segment_dur_majority_vote	0.9842938560668196	0.8292682926829268	0.788464767586707	1.29512176969727	600	4	TweetyNet	results/Bengalese_Finches/hidden_size/hidden_size_16/Bird0/results_210531_091317	results/Bengalese_Finches/hidden_size/hidden_size_16/Bird0/results_210531_091317/config_BirdsongRecognition_bird00.toml	data/BirdsongRecognition/Bird0/Wave_prep_210528_224944.csv	results/Bengalese_Finches/hidden_size/hidden_size_16/Bird0/results_210531_091317/train_dur_600s/replicate_4/TweetyNet/checkpoints/max-val-acc-checkpoint.pt	results/Bengalese_Finches/hidden_size/hidden_size_16/Bird0/results_210531_091317/train_dur_600s/replicate_4/StandardizeSpect	0.02	1.5706143933180483	Bird0	6	hidden_size	16	Bengalese Finch	with
95	none	0.9816064285687952	9.024390243902438	0.6592245142318188	16.27093485897393	600	4	TweetyNet	results/Bengalese_Finches/hidden_size/hidden_size_16/Bird0/results_210531_091317	results/Bengalese_Finches/hidden_size/hidden_size_16/Bird0/results_210531_091317/config_BirdsongRecognition_bird00.toml	data/BirdsongRecognition/Bird0/Wave_prep_210528_224944.csv	results/Bengalese_Finches/hidden_size/hidden_size_16/Bird0/results_210531_091317/train_dur_600s/replicate_4/TweetyNet/checkpoints/max-val-acc-checkpoint.pt	results/Bengalese_Finches/hidden_size/hidden_size_16/Bird0/results_210531_091317/train_dur_600s/replicate_4/StandardizeSpect	0.02	1.8393571431204792	Bird0	6	hidden_size	16	Bengalese Finch	without
98	min_segment_dur_majority_vote	0.9824959167516336	0.975609756097561	0.7574543014864042	1.7379005887826398	600	5	TweetyNet	results/Bengalese_Finches/hidden_size/hidden_size_16/Bird0/results_210531_091317	results/Bengalese_Finches/hidden_size/hidden_size_16/Bird0/results_210531_091317/config_BirdsongRecognition_bird00.toml	data/BirdsongRecognition/Bird0/Wave_prep_210528_224944.csv	results/Bengalese_Finches/hidden_size/hidden_size_16/Bird0/results_210531_091317/train_dur_600s/replicate_5/TweetyNet/checkpoints/max-val-acc-checkpoint.pt	results/Bengalese_Finches/hidden_size/hidden_size_16/Bird0/results_210531_091317/train_dur_600s/replicate_5/StandardizeSpect	0.02	1.7504083248366389	Bird0	6	hidden_size	16	Bengalese Finch	with
99	none	0.9799759275354096	9.48780487804878	0.639722137114097	17.46145822918207	600	5	TweetyNet	results/Bengalese_Finches/hidden_size/hidden_size_16/Bird0/results_210531_091317	results/Bengalese_Finches/hidden_size/hidden_size_16/Bird0/results_210531_091317/config_BirdsongRecognition_bird00.toml	data/BirdsongRecognition/Bird0/Wave_prep_210528_224944.csv	results/Bengalese_Finches/hidden_size/hidden_size_16/Bird0/results_210531_091317/train_dur_600s/replicate_5/TweetyNet/checkpoints/max-val-acc-checkpoint.pt	results/Bengalese_Finches/hidden_size/hidden_size_16/Bird0/results_210531_091317/train_dur_600s/replicate_5/StandardizeSpect	0.02	2.002407246459026	Bird0	6	hidden_size	16	Bengalese Finch	without
102	min_segment_dur_majority_vote	0.983050069909546	0.7560975609756098	0.7708780475937366	1.43010216702258	600	6	TweetyNet	results/Bengalese_Finches/hidden_size/hidden_size_16/Bird0/results_210531_091317	results/Bengalese_Finches/hidden_size/hidden_size_16/Bird0/results_210531_091317/config_BirdsongRecognition_bird00.toml	data/BirdsongRecognition/Bird0/Wave_prep_210528_224944.csv	results/Bengalese_Finches/hidden_size/hidden_size_16/Bird0/results_210531_091317/train_dur_600s/replicate_6/TweetyNet/checkpoints/max-val-acc-checkpoint.pt	results/Bengalese_Finches/hidden_size/hidden_size_16/Bird0/results_210531_091317/train_dur_600s/replicate_6/StandardizeSpect	0.02	1.6949930090453869	Bird0	6	hidden_size	16	Bengalese Finch	with
103	none	0.9802657952985387	9.097560975609756	0.6422135419537368	16.742968185749092	600	6	TweetyNet	results/Bengalese_Finches/hidden_size/hidden_size_16/Bird0/results_210531_091317	results/Bengalese_Finches/hidden_size/hidden_size_16/Bird0/results_210531_091317/config_BirdsongRecognition_bird00.toml	data/BirdsongRecognition/Bird0/Wave_prep_210528_224944.csv	results/Bengalese_Finches/hidden_size/hidden_size_16/Bird0/results_210531_091317/train_dur_600s/replicate_6/TweetyNet/checkpoints/max-val-acc-checkpoint.pt	results/Bengalese_Finches/hidden_size/hidden_size_16/Bird0/results_210531_091317/train_dur_600s/replicate_6/StandardizeSpect	0.02	1.973420470146125	Bird0	6	hidden_size	16	Bengalese Finch	without
106	min_segment_dur_majority_vote	0.9811197588237052	1.048780487804878	0.7119240011694712	2.04743814301592	600	7	TweetyNet	results/Bengalese_Finches/hidden_size/hidden_size_16/Bird0/results_210531_091317	results/Bengalese_Finches/hidden_size/hidden_size_16/Bird0/results_210531_091317/config_BirdsongRecognition_bird00.toml	data/BirdsongRecognition/Bird0/Wave_prep_210528_224944.csv	results/Bengalese_Finches/hidden_size/hidden_size_16/Bird0/results_210531_091317/train_dur_600s/replicate_7/TweetyNet/checkpoints/max-val-acc-checkpoint.pt	results/Bengalese_Finches/hidden_size/hidden_size_16/Bird0/results_210531_091317/train_dur_600s/replicate_7/StandardizeSpect	0.02	1.8880241176294832	Bird0	6	hidden_size	16	Bengalese Finch	with
107	none	0.9779023955436268	9.975609756097562	0.585591675828442	18.92730095701733	600	7	TweetyNet	results/Bengalese_Finches/hidden_size/hidden_size_16/Bird0/results_210531_091317	results/Bengalese_Finches/hidden_size/hidden_size_16/Bird0/results_210531_091317/config_BirdsongRecognition_bird00.toml	data/BirdsongRecognition/Bird0/Wave_prep_210528_224944.csv	results/Bengalese_Finches/hidden_size/hidden_size_16/Bird0/results_210531_091317/train_dur_600s/replicate_7/TweetyNet/checkpoints/max-val-acc-checkpoint.pt	results/Bengalese_Finches/hidden_size/hidden_size_16/Bird0/results_210531_091317/train_dur_600s/replicate_7/StandardizeSpect	0.02	2.209760445637321	Bird0	6	hidden_size	16	Bengalese Finch	without
110	min_segment_dur_majority_vote	0.98250373896499	0.926829268292683	0.727769827113813	1.8110476664311697	600	8	TweetyNet	results/Bengalese_Finches/hidden_size/hidden_size_16/Bird0/results_210531_091317	results/Bengalese_Finches/hidden_size/hidden_size_16/Bird0/results_210531_091317/config_BirdsongRecognition_bird00.toml	data/BirdsongRecognition/Bird0/Wave_prep_210528_224944.csv	results/Bengalese_Finches/hidden_size/hidden_size_16/Bird0/results_210531_091317/train_dur_600s/replicate_8/TweetyNet/checkpoints/max-val-acc-checkpoint.pt	results/Bengalese_Finches/hidden_size/hidden_size_16/Bird0/results_210531_091317/train_dur_600s/replicate_8/StandardizeSpect	0.02	1.7496261035009897	Bird0	6	hidden_size	16	Bengalese Finch	with
111	none	0.980372548417256	9.804878048780488	0.630760806621248	17.945653260654858	600	8	TweetyNet	results/Bengalese_Finches/hidden_size/hidden_size_16/Bird0/results_210531_091317	results/Bengalese_Finches/hidden_size/hidden_size_16/Bird0/results_210531_091317/config_BirdsongRecognition_bird00.toml	data/BirdsongRecognition/Bird0/Wave_prep_210528_224944.csv	results/Bengalese_Finches/hidden_size/hidden_size_16/Bird0/results_210531_091317/train_dur_600s/replicate_8/TweetyNet/checkpoints/max-val-acc-checkpoint.pt	results/Bengalese_Finches/hidden_size/hidden_size_16/Bird0/results_210531_091317/train_dur_600s/replicate_8/StandardizeSpect	0.02	1.9627451582743929	Bird0	6	hidden_size	16	Bengalese Finch	without
114	min_segment_dur_majority_vote	0.9839262493980788	0.7560975609756098	0.7591209085661625	1.52046173817822	600	9	TweetyNet	results/Bengalese_Finches/hidden_size/hidden_size_16/Bird0/results_210531_091317	results/Bengalese_Finches/hidden_size/hidden_size_16/Bird0/results_210531_091317/config_BirdsongRecognition_bird00.toml	data/BirdsongRecognition/Bird0/Wave_prep_210528_224944.csv	results/Bengalese_Finches/hidden_size/hidden_size_16/Bird0/results_210531_091317/train_dur_600s/replicate_9/TweetyNet/checkpoints/max-val-acc-checkpoint.pt	results/Bengalese_Finches/hidden_size/hidden_size_16/Bird0/results_210531_091317/train_dur_600s/replicate_9/StandardizeSpect	0.02	1.6073750601921066	Bird0	6	hidden_size	16	Bengalese Finch	with
115	none	0.9819529853345604	8.21951219512195	0.6647565489102346	15.556297599398633	600	9	TweetyNet	results/Bengalese_Finches/hidden_size/hidden_size_16/Bird0/results_210531_091317	results/Bengalese_Finches/hidden_size/hidden_size_16/Bird0/results_210531_091317/config_BirdsongRecognition_bird00.toml	data/BirdsongRecognition/Bird0/Wave_prep_210528_224944.csv	results/Bengalese_Finches/hidden_size/hidden_size_16/Bird0/results_210531_091317/train_dur_600s/replicate_9/TweetyNet/checkpoints/max-val-acc-checkpoint.pt	results/Bengalese_Finches/hidden_size/hidden_size_16/Bird0/results_210531_091317/train_dur_600s/replicate_9/StandardizeSpect	0.02	1.8047014665439565	Bird0	6	hidden_size	16	Bengalese Finch	without
118	min_segment_dur_majority_vote	0.9832482281918378	0.902439024390244	0.7516117154266201	1.61899843552704	600	10	TweetyNet	results/Bengalese_Finches/hidden_size/hidden_size_16/Bird0/results_210531_091317	results/Bengalese_Finches/hidden_size/hidden_size_16/Bird0/results_210531_091317/config_BirdsongRecognition_bird00.toml	data/BirdsongRecognition/Bird0/Wave_prep_210528_224944.csv	results/Bengalese_Finches/hidden_size/hidden_size_16/Bird0/results_210531_091317/train_dur_600s/replicate_10/TweetyNet/checkpoints/max-val-acc-checkpoint.pt	results/Bengalese_Finches/hidden_size/hidden_size_16/Bird0/results_210531_091317/train_dur_600s/replicate_10/StandardizeSpect	0.02	1.675177180816223	Bird0	6	hidden_size	16	Bengalese Finch	with
119	none	0.9803971306886962	9.48780487804878	0.6351140220918057	17.58334602531452	600	10	TweetyNet	results/Bengalese_Finches/hidden_size/hidden_size_16/Bird0/results_210531_091317	results/Bengalese_Finches/hidden_size/hidden_size_16/Bird0/results_210531_091317/config_BirdsongRecognition_bird00.toml	data/BirdsongRecognition/Bird0/Wave_prep_210528_224944.csv	results/Bengalese_Finches/hidden_size/hidden_size_16/Bird0/results_210531_091317/train_dur_600s/replicate_10/TweetyNet/checkpoints/max-val-acc-checkpoint.pt	results/Bengalese_Finches/hidden_size/hidden_size_16/Bird0/results_210531_091317/train_dur_600s/replicate_10/StandardizeSpect	0.02	1.960286931130384	Bird0	6	hidden_size	16	Bengalese Finch	without
122	min_segment_dur_majority_vote	0.9813748301034224	0.902439024390244	0.7252485827291536	1.96808063398912	480	1	TweetyNet	results/Bengalese_Finches/hidden_size/hidden_size_16/Bird0/results_210531_091317	results/Bengalese_Finches/hidden_size/hidden_size_16/Bird0/results_210531_091317/config_BirdsongRecognition_bird00.toml	data/BirdsongRecognition/Bird0/Wave_prep_210528_224944.csv	results/Bengalese_Finches/hidden_size/hidden_size_16/Bird0/results_210531_091317/train_dur_480s/replicate_1/TweetyNet/checkpoints/max-val-acc-checkpoint.pt	results/Bengalese_Finches/hidden_size/hidden_size_16/Bird0/results_210531_091317/train_dur_480s/replicate_1/StandardizeSpect	0.02	1.8625169896577696	Bird0	5	hidden_size	16	Bengalese Finch	with
123	none	0.9787790041996204	10.048780487804878	0.6233631078309817	18.454835729309018	480	1	TweetyNet	results/Bengalese_Finches/hidden_size/hidden_size_16/Bird0/results_210531_091317	results/Bengalese_Finches/hidden_size/hidden_size_16/Bird0/results_210531_091317/config_BirdsongRecognition_bird00.toml	data/BirdsongRecognition/Bird0/Wave_prep_210528_224944.csv	results/Bengalese_Finches/hidden_size/hidden_size_16/Bird0/results_210531_091317/train_dur_480s/replicate_1/TweetyNet/checkpoints/max-val-acc-checkpoint.pt	results/Bengalese_Finches/hidden_size/hidden_size_16/Bird0/results_210531_091317/train_dur_480s/replicate_1/StandardizeSpect	0.02	2.1220995800379616	Bird0	5	hidden_size	16	Bengalese Finch	without
126	min_segment_dur_majority_vote	0.9816824089614652	0.951219512195122	0.7334686750865221	1.8982683922359096	480	2	TweetyNet	results/Bengalese_Finches/hidden_size/hidden_size_16/Bird0/results_210531_091317	results/Bengalese_Finches/hidden_size/hidden_size_16/Bird0/results_210531_091317/config_BirdsongRecognition_bird00.toml	data/BirdsongRecognition/Bird0/Wave_prep_210528_224944.csv	results/Bengalese_Finches/hidden_size/hidden_size_16/Bird0/results_210531_091317/train_dur_480s/replicate_2/TweetyNet/checkpoints/max-val-acc-checkpoint.pt	results/Bengalese_Finches/hidden_size/hidden_size_16/Bird0/results_210531_091317/train_dur_480s/replicate_2/StandardizeSpect	0.02	1.8317591038534693	Bird0	5	hidden_size	16	Bengalese Finch	with
127	none	0.979078555112466	9.53658536585366	0.621051896509331	18.078784563864	480	2	TweetyNet	results/Bengalese_Finches/hidden_size/hidden_size_16/Bird0/results_210531_091317	results/Bengalese_Finches/hidden_size/hidden_size_16/Bird0/results_210531_091317/config_BirdsongRecognition_bird00.toml	data/BirdsongRecognition/Bird0/Wave_prep_210528_224944.csv	results/Bengalese_Finches/hidden_size/hidden_size_16/Bird0/results_210531_091317/train_dur_480s/replicate_2/TweetyNet/checkpoints/max-val-acc-checkpoint.pt	results/Bengalese_Finches/hidden_size/hidden_size_16/Bird0/results_210531_091317/train_dur_480s/replicate_2/StandardizeSpect	0.02	2.0921444887534	Bird0	5	hidden_size	16	Bengalese Finch	without
130	min_segment_dur_majority_vote	0.9816573540831048	0.8780487804878049	0.7665077343427096	1.45574976784819	480	3	TweetyNet	results/Bengalese_Finches/hidden_size/hidden_size_16/Bird0/results_210531_091317	results/Bengalese_Finches/hidden_size/hidden_size_16/Bird0/results_210531_091317/config_BirdsongRecognition_bird00.toml	data/BirdsongRecognition/Bird0/Wave_prep_210528_224944.csv	results/Bengalese_Finches/hidden_size/hidden_size_16/Bird0/results_210531_091317/train_dur_480s/replicate_3/TweetyNet/checkpoints/max-val-acc-checkpoint.pt	results/Bengalese_Finches/hidden_size/hidden_size_16/Bird0/results_210531_091317/train_dur_480s/replicate_3/StandardizeSpect	0.02	1.8342645916895275	Bird0	5	hidden_size	16	Bengalese Finch	with
131	none	0.9778125233779292	11.853658536585366	0.626938379139577	21.279050475397128	480	3	TweetyNet	results/Bengalese_Finches/hidden_size/hidden_size_16/Bird0/results_210531_091317	results/Bengalese_Finches/hidden_size/hidden_size_16/Bird0/results_210531_091317/config_BirdsongRecognition_bird00.toml	data/BirdsongRecognition/Bird0/Wave_prep_210528_224944.csv	results/Bengalese_Finches/hidden_size/hidden_size_16/Bird0/results_210531_091317/train_dur_480s/replicate_3/TweetyNet/checkpoints/max-val-acc-checkpoint.pt	results/Bengalese_Finches/hidden_size/hidden_size_16/Bird0/results_210531_091317/train_dur_480s/replicate_3/StandardizeSpect	0.02	2.218747662207088	Bird0	5	hidden_size	16	Bengalese Finch	without
134	min_segment_dur_majority_vote	0.9848208711032852	0.6585365853658537	0.7975388685418686	1.15089250991209	480	4	TweetyNet	results/Bengalese_Finches/hidden_size/hidden_size_16/Bird0/results_210531_091317	results/Bengalese_Finches/hidden_size/hidden_size_16/Bird0/results_210531_091317/config_BirdsongRecognition_bird00.toml	data/BirdsongRecognition/Bird0/Wave_prep_210528_224944.csv	results/Bengalese_Finches/hidden_size/hidden_size_16/Bird0/results_210531_091317/train_dur_480s/replicate_4/TweetyNet/checkpoints/max-val-acc-checkpoint.pt	results/Bengalese_Finches/hidden_size/hidden_size_16/Bird0/results_210531_091317/train_dur_480s/replicate_4/StandardizeSpect	0.02	1.51791288967148	Bird0	5	hidden_size	16	Bengalese Finch	with
135	none	0.981882083954579	9.0	0.6570550473127116	16.31288574589884	480	4	TweetyNet	results/Bengalese_Finches/hidden_size/hidden_size_16/Bird0/results_210531_091317	results/Bengalese_Finches/hidden_size/hidden_size_16/Bird0/results_210531_091317/config_BirdsongRecognition_bird00.toml	data/BirdsongRecognition/Bird0/Wave_prep_210528_224944.csv	results/Bengalese_Finches/hidden_size/hidden_size_16/Bird0/results_210531_091317/train_dur_480s/replicate_4/TweetyNet/checkpoints/max-val-acc-checkpoint.pt	results/Bengalese_Finches/hidden_size/hidden_size_16/Bird0/results_210531_091317/train_dur_480s/replicate_4/StandardizeSpect	0.02	1.8117916045421008	Bird0	5	hidden_size	16	Bengalese Finch	without
138	min_segment_dur_majority_vote	0.9803247303389068	1.024390243902439	0.7289354237884059	1.9358800095088495	480	5	TweetyNet	results/Bengalese_Finches/hidden_size/hidden_size_16/Bird0/results_210531_091317	results/Bengalese_Finches/hidden_size/hidden_size_16/Bird0/results_210531_091317/config_BirdsongRecognition_bird00.toml	data/BirdsongRecognition/Bird0/Wave_prep_210528_224944.csv	results/Bengalese_Finches/hidden_size/hidden_size_16/Bird0/results_210531_091317/train_dur_480s/replicate_5/TweetyNet/checkpoints/max-val-acc-checkpoint.pt	results/Bengalese_Finches/hidden_size/hidden_size_16/Bird0/results_210531_091317/train_dur_480s/replicate_5/StandardizeSpect	0.02	1.967526966109312	Bird0	5	hidden_size	16	Bengalese Finch	with
139	none	0.97752384100288	9.878048780487806	0.6124389632723576	17.55912312799467	480	5	TweetyNet	results/Bengalese_Finches/hidden_size/hidden_size_16/Bird0/results_210531_091317	results/Bengalese_Finches/hidden_size/hidden_size_16/Bird0/results_210531_091317/config_BirdsongRecognition_bird00.toml	data/BirdsongRecognition/Bird0/Wave_prep_210528_224944.csv	results/Bengalese_Finches/hidden_size/hidden_size_16/Bird0/results_210531_091317/train_dur_480s/replicate_5/TweetyNet/checkpoints/max-val-acc-checkpoint.pt	results/Bengalese_Finches/hidden_size/hidden_size_16/Bird0/results_210531_091317/train_dur_480s/replicate_5/StandardizeSpect	0.02	2.247615899711985	Bird0	5	hidden_size	16	Bengalese Finch	without
142	min_segment_dur_majority_vote	0.983591951467052	0.8292682926829268	0.783100965289201	1.37400531884558	480	6	TweetyNet	results/Bengalese_Finches/hidden_size/hidden_size_16/Bird0/results_210531_091317	results/Bengalese_Finches/hidden_size/hidden_size_16/Bird0/results_210531_091317/config_BirdsongRecognition_bird00.toml	data/BirdsongRecognition/Bird0/Wave_prep_210528_224944.csv	results/Bengalese_Finches/hidden_size/hidden_size_16/Bird0/results_210531_091317/train_dur_480s/replicate_6/TweetyNet/checkpoints/max-val-acc-checkpoint.pt	results/Bengalese_Finches/hidden_size/hidden_size_16/Bird0/results_210531_091317/train_dur_480s/replicate_6/StandardizeSpect	0.02	1.6408048532948083	Bird0	5	hidden_size	16	Bengalese Finch	with
143	none	0.9805453122294668	8.365853658536585	0.6488717104097864	15.299300226688562	480	6	TweetyNet	results/Bengalese_Finches/hidden_size/hidden_size_16/Bird0/results_210531_091317	results/Bengalese_Finches/hidden_size/hidden_size_16/Bird0/results_210531_091317/config_BirdsongRecognition_bird00.toml	data/BirdsongRecognition/Bird0/Wave_prep_210528_224944.csv	results/Bengalese_Finches/hidden_size/hidden_size_16/Bird0/results_210531_091317/train_dur_480s/replicate_6/TweetyNet/checkpoints/max-val-acc-checkpoint.pt	results/Bengalese_Finches/hidden_size/hidden_size_16/Bird0/results_210531_091317/train_dur_480s/replicate_6/StandardizeSpect	0.02	1.945468777053328	Bird0	5	hidden_size	16	Bengalese Finch	without
146	min_segment_dur_majority_vote	0.9834951029423744	0.7804878048780488	0.7585241416460975	1.40475987857135	480	7	TweetyNet	results/Bengalese_Finches/hidden_size/hidden_size_16/Bird0/results_210531_091317	results/Bengalese_Finches/hidden_size/hidden_size_16/Bird0/results_210531_091317/config_BirdsongRecognition_bird00.toml	data/BirdsongRecognition/Bird0/Wave_prep_210528_224944.csv	results/Bengalese_Finches/hidden_size/hidden_size_16/Bird0/results_210531_091317/train_dur_480s/replicate_7/TweetyNet/checkpoints/max-val-acc-checkpoint.pt	results/Bengalese_Finches/hidden_size/hidden_size_16/Bird0/results_210531_091317/train_dur_480s/replicate_7/StandardizeSpect	0.02	1.65048970576257	Bird0	5	hidden_size	16	Bengalese Finch	with
147	none	0.9807308186395248	10.195121951219512	0.635238448928748	18.99758280738929	480	7	TweetyNet	results/Bengalese_Finches/hidden_size/hidden_size_16/Bird0/results_210531_091317	results/Bengalese_Finches/hidden_size/hidden_size_16/Bird0/results_210531_091317/config_BirdsongRecognition_bird00.toml	data/BirdsongRecognition/Bird0/Wave_prep_210528_224944.csv	results/Bengalese_Finches/hidden_size/hidden_size_16/Bird0/results_210531_091317/train_dur_480s/replicate_7/TweetyNet/checkpoints/max-val-acc-checkpoint.pt	results/Bengalese_Finches/hidden_size/hidden_size_16/Bird0/results_210531_091317/train_dur_480s/replicate_7/StandardizeSpect	0.02	1.9269181360475167	Bird0	5	hidden_size	16	Bengalese Finch	without
150	min_segment_dur_majority_vote	0.9837837133272164	0.7804878048780488	0.7790112966699233	1.48455718752678	480	8	TweetyNet	results/Bengalese_Finches/hidden_size/hidden_size_16/Bird0/results_210531_091317	results/Bengalese_Finches/hidden_size/hidden_size_16/Bird0/results_210531_091317/config_BirdsongRecognition_bird00.toml	data/BirdsongRecognition/Bird0/Wave_prep_210528_224944.csv	results/Bengalese_Finches/hidden_size/hidden_size_16/Bird0/results_210531_091317/train_dur_480s/replicate_8/TweetyNet/checkpoints/max-val-acc-checkpoint.pt	results/Bengalese_Finches/hidden_size/hidden_size_16/Bird0/results_210531_091317/train_dur_480s/replicate_8/StandardizeSpect	0.02	1.621628667278352	Bird0	5	hidden_size	16	Bengalese Finch	with
151	none	0.9813996892279666	9.317073170731708	0.6561827734889856	16.99441520430473	480	8	TweetyNet	results/Bengalese_Finches/hidden_size/hidden_size_16/Bird0/results_210531_091317	results/Bengalese_Finches/hidden_size/hidden_size_16/Bird0/results_210531_091317/config_BirdsongRecognition_bird00.toml	data/BirdsongRecognition/Bird0/Wave_prep_210528_224944.csv	results/Bengalese_Finches/hidden_size/hidden_size_16/Bird0/results_210531_091317/train_dur_480s/replicate_8/TweetyNet/checkpoints/max-val-acc-checkpoint.pt	results/Bengalese_Finches/hidden_size/hidden_size_16/Bird0/results_210531_091317/train_dur_480s/replicate_8/StandardizeSpect	0.02	1.860031077203339	Bird0	5	hidden_size	16	Bengalese Finch	without
154	min_segment_dur_majority_vote	0.9825011094234984	0.951219512195122	0.7533548915693437	1.70936643539974	480	9	TweetyNet	results/Bengalese_Finches/hidden_size/hidden_size_16/Bird0/results_210531_091317	results/Bengalese_Finches/hidden_size/hidden_size_16/Bird0/results_210531_091317/config_BirdsongRecognition_bird00.toml	data/BirdsongRecognition/Bird0/Wave_prep_210528_224944.csv	results/Bengalese_Finches/hidden_size/hidden_size_16/Bird0/results_210531_091317/train_dur_480s/replicate_9/TweetyNet/checkpoints/max-val-acc-checkpoint.pt	results/Bengalese_Finches/hidden_size/hidden_size_16/Bird0/results_210531_091317/train_dur_480s/replicate_9/StandardizeSpect	0.02	1.749889057650167	Bird0	5	hidden_size	16	Bengalese Finch	with
155	none	0.979956875596327	8.707317073170731	0.6346408802295994	18.03159692164923	480	9	TweetyNet	results/Bengalese_Finches/hidden_size/hidden_size_16/Bird0/results_210531_091317	results/Bengalese_Finches/hidden_size/hidden_size_16/Bird0/results_210531_091317/config_BirdsongRecognition_bird00.toml	data/BirdsongRecognition/Bird0/Wave_prep_210528_224944.csv	results/Bengalese_Finches/hidden_size/hidden_size_16/Bird0/results_210531_091317/train_dur_480s/replicate_9/TweetyNet/checkpoints/max-val-acc-checkpoint.pt	results/Bengalese_Finches/hidden_size/hidden_size_16/Bird0/results_210531_091317/train_dur_480s/replicate_9/StandardizeSpect	0.02	2.004312440367295	Bird0	5	hidden_size	16	Bengalese Finch	without
158	min_segment_dur_majority_vote	0.9798038403698798	1.146341463414634	0.6914033706030944	2.16646316308413	480	10	TweetyNet	results/Bengalese_Finches/hidden_size/hidden_size_16/Bird0/results_210531_091317	results/Bengalese_Finches/hidden_size/hidden_size_16/Bird0/results_210531_091317/config_BirdsongRecognition_bird00.toml	data/BirdsongRecognition/Bird0/Wave_prep_210528_224944.csv	results/Bengalese_Finches/hidden_size/hidden_size_16/Bird0/results_210531_091317/train_dur_480s/replicate_10/TweetyNet/checkpoints/max-val-acc-checkpoint.pt	results/Bengalese_Finches/hidden_size/hidden_size_16/Bird0/results_210531_091317/train_dur_480s/replicate_10/StandardizeSpect	0.02	2.0196159630120225	Bird0	5	hidden_size	16	Bengalese Finch	with
159	none	0.9768205548203548	10.804878048780488	0.5814313474338323	20.53371045578452	480	10	TweetyNet	results/Bengalese_Finches/hidden_size/hidden_size_16/Bird0/results_210531_091317	results/Bengalese_Finches/hidden_size/hidden_size_16/Bird0/results_210531_091317/config_BirdsongRecognition_bird00.toml	data/BirdsongRecognition/Bird0/Wave_prep_210528_224944.csv	results/Bengalese_Finches/hidden_size/hidden_size_16/Bird0/results_210531_091317/train_dur_480s/replicate_10/TweetyNet/checkpoints/max-val-acc-checkpoint.pt	results/Bengalese_Finches/hidden_size/hidden_size_16/Bird0/results_210531_091317/train_dur_480s/replicate_10/StandardizeSpect	0.02	2.317944517964532	Bird0	5	hidden_size	16	Bengalese Finch	without
162	min_segment_dur_majority_vote	0.9602825296693996	3.414634146341464	0.4347773298775235	7.25048959235849	30	1	TweetyNet	results/Bengalese_Finches/hidden_size/hidden_size_16/Bird0/results_210531_091317	results/Bengalese_Finches/hidden_size/hidden_size_16/Bird0/results_210531_091317/config_BirdsongRecognition_bird00.toml	data/BirdsongRecognition/Bird0/Wave_prep_210528_224944.csv	results/Bengalese_Finches/hidden_size/hidden_size_16/Bird0/results_210531_091317/train_dur_30s/replicate_1/TweetyNet/checkpoints/max-val-acc-checkpoint.pt	results/Bengalese_Finches/hidden_size/hidden_size_16/Bird0/results_210531_091317/train_dur_30s/replicate_1/StandardizeSpect	0.02	3.971747033060036	Bird0	0	hidden_size	16	Bengalese Finch	with
163	none	0.9534240488553803	30.317073170731707	0.3434489109996034	58.381425198445335	30	1	TweetyNet	results/Bengalese_Finches/hidden_size/hidden_size_16/Bird0/results_210531_091317	results/Bengalese_Finches/hidden_size/hidden_size_16/Bird0/results_210531_091317/config_BirdsongRecognition_bird00.toml	data/BirdsongRecognition/Bird0/Wave_prep_210528_224944.csv	results/Bengalese_Finches/hidden_size/hidden_size_16/Bird0/results_210531_091317/train_dur_30s/replicate_1/TweetyNet/checkpoints/max-val-acc-checkpoint.pt	results/Bengalese_Finches/hidden_size/hidden_size_16/Bird0/results_210531_091317/train_dur_30s/replicate_1/StandardizeSpect	0.02	4.657595114461954	Bird0	0	hidden_size	16	Bengalese Finch	without
166	min_segment_dur_majority_vote	0.9644821261693758	2.8780487804878048	0.4953436142587619	5.813576049670631	30	2	TweetyNet	results/Bengalese_Finches/hidden_size/hidden_size_16/Bird0/results_210531_091317	results/Bengalese_Finches/hidden_size/hidden_size_16/Bird0/results_210531_091317/config_BirdsongRecognition_bird00.toml	data/BirdsongRecognition/Bird0/Wave_prep_210528_224944.csv	results/Bengalese_Finches/hidden_size/hidden_size_16/Bird0/results_210531_091317/train_dur_30s/replicate_2/TweetyNet/checkpoints/max-val-acc-checkpoint.pt	results/Bengalese_Finches/hidden_size/hidden_size_16/Bird0/results_210531_091317/train_dur_30s/replicate_2/StandardizeSpect	0.02	3.5517873830624214	Bird0	0	hidden_size	16	Bengalese Finch	with
167	none	0.955767436195918	26.804878048780488	0.362079878079721	49.30305117135279	30	2	TweetyNet	results/Bengalese_Finches/hidden_size/hidden_size_16/Bird0/results_210531_091317	results/Bengalese_Finches/hidden_size/hidden_size_16/Bird0/results_210531_091317/config_BirdsongRecognition_bird00.toml	data/BirdsongRecognition/Bird0/Wave_prep_210528_224944.csv	results/Bengalese_Finches/hidden_size/hidden_size_16/Bird0/results_210531_091317/train_dur_30s/replicate_2/TweetyNet/checkpoints/max-val-acc-checkpoint.pt	results/Bengalese_Finches/hidden_size/hidden_size_16/Bird0/results_210531_091317/train_dur_30s/replicate_2/StandardizeSpect	0.02	4.423256380408203	Bird0	0	hidden_size	16	Bengalese Finch	without
170	min_segment_dur_majority_vote	0.969816270351438	2.317073170731707	0.5337963779580137	4.59158330029471	30	3	TweetyNet	results/Bengalese_Finches/hidden_size/hidden_size_16/Bird0/results_210531_091317	results/Bengalese_Finches/hidden_size/hidden_size_16/Bird0/results_210531_091317/config_BirdsongRecognition_bird00.toml	data/BirdsongRecognition/Bird0/Wave_prep_210528_224944.csv	results/Bengalese_Finches/hidden_size/hidden_size_16/Bird0/results_210531_091317/train_dur_30s/replicate_3/TweetyNet/checkpoints/max-val-acc-checkpoint.pt	results/Bengalese_Finches/hidden_size/hidden_size_16/Bird0/results_210531_091317/train_dur_30s/replicate_3/StandardizeSpect	0.02	3.018372964856197	Bird0	0	hidden_size	16	Bengalese Finch	with
171	none	0.9609977259539152	27.463414634146343	0.3938183380981178	53.74152902060235	30	3	TweetyNet	results/Bengalese_Finches/hidden_size/hidden_size_16/Bird0/results_210531_091317	results/Bengalese_Finches/hidden_size/hidden_size_16/Bird0/results_210531_091317/config_BirdsongRecognition_bird00.toml	data/BirdsongRecognition/Bird0/Wave_prep_210528_224944.csv	results/Bengalese_Finches/hidden_size/hidden_size_16/Bird0/results_210531_091317/train_dur_30s/replicate_3/TweetyNet/checkpoints/max-val-acc-checkpoint.pt	results/Bengalese_Finches/hidden_size/hidden_size_16/Bird0/results_210531_091317/train_dur_30s/replicate_3/StandardizeSpect	0.02	3.900227404608492	Bird0	0	hidden_size	16	Bengalese Finch	without
174	min_segment_dur_majority_vote	0.9691195281721792	2.268292682926829	0.5479506690873696	4.44728941132928	30	4	TweetyNet	results/Bengalese_Finches/hidden_size/hidden_size_16/Bird0/results_210531_091317	results/Bengalese_Finches/hidden_size/hidden_size_16/Bird0/results_210531_091317/config_BirdsongRecognition_bird00.toml	data/BirdsongRecognition/Bird0/Wave_prep_210528_224944.csv	results/Bengalese_Finches/hidden_size/hidden_size_16/Bird0/results_210531_091317/train_dur_30s/replicate_4/TweetyNet/checkpoints/max-val-acc-checkpoint.pt	results/Bengalese_Finches/hidden_size/hidden_size_16/Bird0/results_210531_091317/train_dur_30s/replicate_4/StandardizeSpect	0.02	3.0880471827820832	Bird0	0	hidden_size	16	Bengalese Finch	with
175	none	0.9604131749639224	30.60975609756097	0.4035537709528147	53.7484348821701	30	4	TweetyNet	results/Bengalese_Finches/hidden_size/hidden_size_16/Bird0/results_210531_091317	results/Bengalese_Finches/hidden_size/hidden_size_16/Bird0/results_210531_091317/config_BirdsongRecognition_bird00.toml	data/BirdsongRecognition/Bird0/Wave_prep_210528_224944.csv	results/Bengalese_Finches/hidden_size/hidden_size_16/Bird0/results_210531_091317/train_dur_30s/replicate_4/TweetyNet/checkpoints/max-val-acc-checkpoint.pt	results/Bengalese_Finches/hidden_size/hidden_size_16/Bird0/results_210531_091317/train_dur_30s/replicate_4/StandardizeSpect	0.02	3.958682503607769	Bird0	0	hidden_size	16	Bengalese Finch	without
178	min_segment_dur_majority_vote	0.967985430918688	2.414634146341464	0.5231570530177849	4.65478270468633	30	5	TweetyNet	results/Bengalese_Finches/hidden_size/hidden_size_16/Bird0/results_210531_091317	results/Bengalese_Finches/hidden_size/hidden_size_16/Bird0/results_210531_091317/config_BirdsongRecognition_bird00.toml	data/BirdsongRecognition/Bird0/Wave_prep_210528_224944.csv	results/Bengalese_Finches/hidden_size/hidden_size_16/Bird0/results_210531_091317/train_dur_30s/replicate_5/TweetyNet/checkpoints/max-val-acc-checkpoint.pt	results/Bengalese_Finches/hidden_size/hidden_size_16/Bird0/results_210531_091317/train_dur_30s/replicate_5/StandardizeSpect	0.02	3.201456908131206	Bird0	0	hidden_size	16	Bengalese Finch	with
179	none	0.9592991373891744	31.75609756097561	0.3842977881761383	57.51061305067551	30	5	TweetyNet	results/Bengalese_Finches/hidden_size/hidden_size_16/Bird0/results_210531_091317	results/Bengalese_Finches/hidden_size/hidden_size_16/Bird0/results_210531_091317/config_BirdsongRecognition_bird00.toml	data/BirdsongRecognition/Bird0/Wave_prep_210528_224944.csv	results/Bengalese_Finches/hidden_size/hidden_size_16/Bird0/results_210531_091317/train_dur_30s/replicate_5/TweetyNet/checkpoints/max-val-acc-checkpoint.pt	results/Bengalese_Finches/hidden_size/hidden_size_16/Bird0/results_210531_091317/train_dur_30s/replicate_5/StandardizeSpect	0.02	4.070086261082551	Bird0	0	hidden_size	16	Bengalese Finch	without
182	min_segment_dur_majority_vote	0.966026978522181	2.7804878048780486	0.4845496934505712	5.36281243931656	30	6	TweetyNet	results/Bengalese_Finches/hidden_size/hidden_size_16/Bird0/results_210531_091317	results/Bengalese_Finches/hidden_size/hidden_size_16/Bird0/results_210531_091317/config_BirdsongRecognition_bird00.toml	data/BirdsongRecognition/Bird0/Wave_prep_210528_224944.csv	results/Bengalese_Finches/hidden_size/hidden_size_16/Bird0/results_210531_091317/train_dur_30s/replicate_6/TweetyNet/checkpoints/max-val-acc-checkpoint.pt	results/Bengalese_Finches/hidden_size/hidden_size_16/Bird0/results_210531_091317/train_dur_30s/replicate_6/StandardizeSpect	0.02	3.3973021477819	Bird0	0	hidden_size	16	Bengalese Finch	with
183	none	0.9551635940768431	40.97560975609756	0.338886344983446	76.1155033796528	30	6	TweetyNet	results/Bengalese_Finches/hidden_size/hidden_size_16/Bird0/results_210531_091317	results/Bengalese_Finches/hidden_size/hidden_size_16/Bird0/results_210531_091317/config_BirdsongRecognition_bird00.toml	data/BirdsongRecognition/Bird0/Wave_prep_210528_224944.csv	results/Bengalese_Finches/hidden_size/hidden_size_16/Bird0/results_210531_091317/train_dur_30s/replicate_6/TweetyNet/checkpoints/max-val-acc-checkpoint.pt	results/Bengalese_Finches/hidden_size/hidden_size_16/Bird0/results_210531_091317/train_dur_30s/replicate_6/StandardizeSpect	0.02	4.483640592315686	Bird0	0	hidden_size	16	Bengalese Finch	without
186	min_segment_dur_majority_vote	0.966234265716844	2.707317073170732	0.5195046769082953	4.98821703039942	30	7	TweetyNet	results/Bengalese_Finches/hidden_size/hidden_size_16/Bird0/results_210531_091317	results/Bengalese_Finches/hidden_size/hidden_size_16/Bird0/results_210531_091317/config_BirdsongRecognition_bird00.toml	data/BirdsongRecognition/Bird0/Wave_prep_210528_224944.csv	results/Bengalese_Finches/hidden_size/hidden_size_16/Bird0/results_210531_091317/train_dur_30s/replicate_7/TweetyNet/checkpoints/max-val-acc-checkpoint.pt	results/Bengalese_Finches/hidden_size/hidden_size_16/Bird0/results_210531_091317/train_dur_30s/replicate_7/StandardizeSpect	0.02	3.37657342831561	Bird0	0	hidden_size	16	Bengalese Finch	with
187	none	0.9580565593455352	28.09756097560976	0.4004119236133721	52.83398300070464	30	7	TweetyNet	results/Bengalese_Finches/hidden_size/hidden_size_16/Bird0/results_210531_091317	results/Bengalese_Finches/hidden_size/hidden_size_16/Bird0/results_210531_091317/config_BirdsongRecognition_bird00.toml	data/BirdsongRecognition/Bird0/Wave_prep_210528_224944.csv	results/Bengalese_Finches/hidden_size/hidden_size_16/Bird0/results_210531_091317/train_dur_30s/replicate_7/TweetyNet/checkpoints/max-val-acc-checkpoint.pt	results/Bengalese_Finches/hidden_size/hidden_size_16/Bird0/results_210531_091317/train_dur_30s/replicate_7/StandardizeSpect	0.02	4.194344065446476	Bird0	0	hidden_size	16	Bengalese Finch	without
190	min_segment_dur_majority_vote	0.9615485774913392	3.292682926829268	0.4727139173078333	6.01176884632618	30	8	TweetyNet	results/Bengalese_Finches/hidden_size/hidden_size_16/Bird0/results_210531_091317	results/Bengalese_Finches/hidden_size/hidden_size_16/Bird0/results_210531_091317/config_BirdsongRecognition_bird00.toml	data/BirdsongRecognition/Bird0/Wave_prep_210528_224944.csv	results/Bengalese_Finches/hidden_size/hidden_size_16/Bird0/results_210531_091317/train_dur_30s/replicate_8/TweetyNet/checkpoints/max-val-acc-checkpoint.pt	results/Bengalese_Finches/hidden_size/hidden_size_16/Bird0/results_210531_091317/train_dur_30s/replicate_8/StandardizeSpect	0.02	3.8451422508660738	Bird0	0	hidden_size	16	Bengalese Finch	with
191	none	0.95141030810567	31.585365853658537	0.34955469782749	56.966550757407695	30	8	TweetyNet	results/Bengalese_Finches/hidden_size/hidden_size_16/Bird0/results_210531_091317	results/Bengalese_Finches/hidden_size/hidden_size_16/Bird0/results_210531_091317/config_BirdsongRecognition_bird00.toml	data/BirdsongRecognition/Bird0/Wave_prep_210528_224944.csv	results/Bengalese_Finches/hidden_size/hidden_size_16/Bird0/results_210531_091317/train_dur_30s/replicate_8/TweetyNet/checkpoints/max-val-acc-checkpoint.pt	results/Bengalese_Finches/hidden_size/hidden_size_16/Bird0/results_210531_091317/train_dur_30s/replicate_8/StandardizeSpect	0.02	4.8589691894330045	Bird0	0	hidden_size	16	Bengalese Finch	without
194	min_segment_dur_majority_vote	0.9684849026807908	2.5365853658536586	0.5504826286730204	4.83704340183136	30	9	TweetyNet	results/Bengalese_Finches/hidden_size/hidden_size_16/Bird0/results_210531_091317	results/Bengalese_Finches/hidden_size/hidden_size_16/Bird0/results_210531_091317/config_BirdsongRecognition_bird00.toml	data/BirdsongRecognition/Bird0/Wave_prep_210528_224944.csv	results/Bengalese_Finches/hidden_size/hidden_size_16/Bird0/results_210531_091317/train_dur_30s/replicate_9/TweetyNet/checkpoints/max-val-acc-checkpoint.pt	results/Bengalese_Finches/hidden_size/hidden_size_16/Bird0/results_210531_091317/train_dur_30s/replicate_9/StandardizeSpect	0.02	3.1515097319209096	Bird0	0	hidden_size	16	Bengalese Finch	with
195	none	0.9597929559275312	31.17073170731708	0.4024644368621075	56.96362545662696	30	9	TweetyNet	results/Bengalese_Finches/hidden_size/hidden_size_16/Bird0/results_210531_091317	results/Bengalese_Finches/hidden_size/hidden_size_16/Bird0/results_210531_091317/config_BirdsongRecognition_bird00.toml	data/BirdsongRecognition/Bird0/Wave_prep_210528_224944.csv	results/Bengalese_Finches/hidden_size/hidden_size_16/Bird0/results_210531_091317/train_dur_30s/replicate_9/TweetyNet/checkpoints/max-val-acc-checkpoint.pt	results/Bengalese_Finches/hidden_size/hidden_size_16/Bird0/results_210531_091317/train_dur_30s/replicate_9/StandardizeSpect	0.02	4.020704407246889	Bird0	0	hidden_size	16	Bengalese Finch	without
198	min_segment_dur_majority_vote	0.9647353468184298	3.073170731707317	0.4901481589922939	6.10484853116993	30	10	TweetyNet	results/Bengalese_Finches/hidden_size/hidden_size_16/Bird0/results_210531_091317	results/Bengalese_Finches/hidden_size/hidden_size_16/Bird0/results_210531_091317/config_BirdsongRecognition_bird00.toml	data/BirdsongRecognition/Bird0/Wave_prep_210528_224944.csv	results/Bengalese_Finches/hidden_size/hidden_size_16/Bird0/results_210531_091317/train_dur_30s/replicate_10/TweetyNet/checkpoints/max-val-acc-checkpoint.pt	results/Bengalese_Finches/hidden_size/hidden_size_16/Bird0/results_210531_091317/train_dur_30s/replicate_10/StandardizeSpect	0.02	3.526465318157024	Bird0	0	hidden_size	16	Bengalese Finch	with
199	none	0.954699511118677	36.68292682926829	0.3583767077957052	67.71792917426372	30	10	TweetyNet	results/Bengalese_Finches/hidden_size/hidden_size_16/Bird0/results_210531_091317	results/Bengalese_Finches/hidden_size/hidden_size_16/Bird0/results_210531_091317/config_BirdsongRecognition_bird00.toml	data/BirdsongRecognition/Bird0/Wave_prep_210528_224944.csv	results/Bengalese_Finches/hidden_size/hidden_size_16/Bird0/results_210531_091317/train_dur_30s/replicate_10/TweetyNet/checkpoints/max-val-acc-checkpoint.pt	results/Bengalese_Finches/hidden_size/hidden_size_16/Bird0/results_210531_091317/train_dur_30s/replicate_10/StandardizeSpect	0.02	4.530048888132299	Bird0	0	hidden_size	16	Bengalese Finch	without
202	min_segment_dur_majority_vote	0.9795897353057016	1.0731707317073171	0.7021081178525226	2.03728957709482	180	1	TweetyNet	results/Bengalese_Finches/hidden_size/hidden_size_16/Bird0/results_210531_091317	results/Bengalese_Finches/hidden_size/hidden_size_16/Bird0/results_210531_091317/config_BirdsongRecognition_bird00.toml	data/BirdsongRecognition/Bird0/Wave_prep_210528_224944.csv	results/Bengalese_Finches/hidden_size/hidden_size_16/Bird0/results_210531_091317/train_dur_180s/replicate_1/TweetyNet/checkpoints/max-val-acc-checkpoint.pt	results/Bengalese_Finches/hidden_size/hidden_size_16/Bird0/results_210531_091317/train_dur_180s/replicate_1/StandardizeSpect	0.02	2.041026469429852	Bird0	4	hidden_size	16	Bengalese Finch	with
203	none	0.9762148636425648	12.634146341463415	0.5784778644209723	24.396561860123512	180	1	TweetyNet	results/Bengalese_Finches/hidden_size/hidden_size_16/Bird0/results_210531_091317	results/Bengalese_Finches/hidden_size/hidden_size_16/Bird0/results_210531_091317/config_BirdsongRecognition_bird00.toml	data/BirdsongRecognition/Bird0/Wave_prep_210528_224944.csv	results/Bengalese_Finches/hidden_size/hidden_size_16/Bird0/results_210531_091317/train_dur_180s/replicate_1/TweetyNet/checkpoints/max-val-acc-checkpoint.pt	results/Bengalese_Finches/hidden_size/hidden_size_16/Bird0/results_210531_091317/train_dur_180s/replicate_1/StandardizeSpect	0.02	2.378513635743529	Bird0	4	hidden_size	16	Bengalese Finch	without
206	min_segment_dur_majority_vote	0.979321205320008	1.2682926829268293	0.6723856622989273	2.5911946344168	180	2	TweetyNet	results/Bengalese_Finches/hidden_size/hidden_size_16/Bird0/results_210531_091317	results/Bengalese_Finches/hidden_size/hidden_size_16/Bird0/results_210531_091317/config_BirdsongRecognition_bird00.toml	data/BirdsongRecognition/Bird0/Wave_prep_210528_224944.csv	results/Bengalese_Finches/hidden_size/hidden_size_16/Bird0/results_210531_091317/train_dur_180s/replicate_2/TweetyNet/checkpoints/max-val-acc-checkpoint.pt	results/Bengalese_Finches/hidden_size/hidden_size_16/Bird0/results_210531_091317/train_dur_180s/replicate_2/StandardizeSpect	0.02	2.0678794679991896	Bird0	4	hidden_size	16	Bengalese Finch	with
207	none	0.9756909025932312	13.439024390243905	0.550546180046669	25.98160460015848	180	2	TweetyNet	results/Bengalese_Finches/hidden_size/hidden_size_16/Bird0/results_210531_091317	results/Bengalese_Finches/hidden_size/hidden_size_16/Bird0/results_210531_091317/config_BirdsongRecognition_bird00.toml	data/BirdsongRecognition/Bird0/Wave_prep_210528_224944.csv	results/Bengalese_Finches/hidden_size/hidden_size_16/Bird0/results_210531_091317/train_dur_180s/replicate_2/TweetyNet/checkpoints/max-val-acc-checkpoint.pt	results/Bengalese_Finches/hidden_size/hidden_size_16/Bird0/results_210531_091317/train_dur_180s/replicate_2/StandardizeSpect	0.02	2.430909740676868	Bird0	4	hidden_size	16	Bengalese Finch	without
210	min_segment_dur_majority_vote	0.9799711318544744	1.2439024390243902	0.7081338444934525	2.17656134955605	180	3	TweetyNet	results/Bengalese_Finches/hidden_size/hidden_size_16/Bird0/results_210531_091317	results/Bengalese_Finches/hidden_size/hidden_size_16/Bird0/results_210531_091317/config_BirdsongRecognition_bird00.toml	data/BirdsongRecognition/Bird0/Wave_prep_210528_224944.csv	results/Bengalese_Finches/hidden_size/hidden_size_16/Bird0/results_210531_091317/train_dur_180s/replicate_3/TweetyNet/checkpoints/max-val-acc-checkpoint.pt	results/Bengalese_Finches/hidden_size/hidden_size_16/Bird0/results_210531_091317/train_dur_180s/replicate_3/StandardizeSpect	0.02	2.0028868145525625	Bird0	4	hidden_size	16	Bengalese Finch	with
211	none	0.9756866526965456	13.560975609756095	0.5663740808651001	25.776345445405006	180	3	TweetyNet	results/Bengalese_Finches/hidden_size/hidden_size_16/Bird0/results_210531_091317	results/Bengalese_Finches/hidden_size/hidden_size_16/Bird0/results_210531_091317/config_BirdsongRecognition_bird00.toml	data/BirdsongRecognition/Bird0/Wave_prep_210528_224944.csv	results/Bengalese_Finches/hidden_size/hidden_size_16/Bird0/results_210531_091317/train_dur_180s/replicate_3/TweetyNet/checkpoints/max-val-acc-checkpoint.pt	results/Bengalese_Finches/hidden_size/hidden_size_16/Bird0/results_210531_091317/train_dur_180s/replicate_3/StandardizeSpect	0.02	2.431334730345436	Bird0	4	hidden_size	16	Bengalese Finch	without
214	min_segment_dur_majority_vote	0.977074630114467	1.5121951219512195	0.648036393380965	2.989384905988	180	4	TweetyNet	results/Bengalese_Finches/hidden_size/hidden_size_16/Bird0/results_210531_091317	results/Bengalese_Finches/hidden_size/hidden_size_16/Bird0/results_210531_091317/config_BirdsongRecognition_bird00.toml	data/BirdsongRecognition/Bird0/Wave_prep_210528_224944.csv	results/Bengalese_Finches/hidden_size/hidden_size_16/Bird0/results_210531_091317/train_dur_180s/replicate_4/TweetyNet/checkpoints/max-val-acc-checkpoint.pt	results/Bengalese_Finches/hidden_size/hidden_size_16/Bird0/results_210531_091317/train_dur_180s/replicate_4/StandardizeSpect	0.02	2.292536988553296	Bird0	4	hidden_size	16	Bengalese Finch	with
215	none	0.9736319480130669	13.926829268292684	0.5550952731860654	23.86856501218016	180	4	TweetyNet	results/Bengalese_Finches/hidden_size/hidden_size_16/Bird0/results_210531_091317	results/Bengalese_Finches/hidden_size/hidden_size_16/Bird0/results_210531_091317/config_BirdsongRecognition_bird00.toml	data/BirdsongRecognition/Bird0/Wave_prep_210528_224944.csv	results/Bengalese_Finches/hidden_size/hidden_size_16/Bird0/results_210531_091317/train_dur_180s/replicate_4/TweetyNet/checkpoints/max-val-acc-checkpoint.pt	results/Bengalese_Finches/hidden_size/hidden_size_16/Bird0/results_210531_091317/train_dur_180s/replicate_4/StandardizeSpect	0.02	2.636805198693326	Bird0	4	hidden_size	16	Bengalese Finch	without
218	min_segment_dur_majority_vote	0.9795954803566466	1.2195121951219512	0.6692306649929198	2.4943743914544703	180	5	TweetyNet	results/Bengalese_Finches/hidden_size/hidden_size_16/Bird0/results_210531_091317	results/Bengalese_Finches/hidden_size/hidden_size_16/Bird0/results_210531_091317/config_BirdsongRecognition_bird00.toml	data/BirdsongRecognition/Bird0/Wave_prep_210528_224944.csv	results/Bengalese_Finches/hidden_size/hidden_size_16/Bird0/results_210531_091317/train_dur_180s/replicate_5/TweetyNet/checkpoints/max-val-acc-checkpoint.pt	results/Bengalese_Finches/hidden_size/hidden_size_16/Bird0/results_210531_091317/train_dur_180s/replicate_5/StandardizeSpect	0.02	2.040451964335344	Bird0	4	hidden_size	16	Bengalese Finch	with
219	none	0.976343025899788	11.121951219512194	0.5645251325446867	20.39112708370768	180	5	TweetyNet	results/Bengalese_Finches/hidden_size/hidden_size_16/Bird0/results_210531_091317	results/Bengalese_Finches/hidden_size/hidden_size_16/Bird0/results_210531_091317/config_BirdsongRecognition_bird00.toml	data/BirdsongRecognition/Bird0/Wave_prep_210528_224944.csv	results/Bengalese_Finches/hidden_size/hidden_size_16/Bird0/results_210531_091317/train_dur_180s/replicate_5/TweetyNet/checkpoints/max-val-acc-checkpoint.pt	results/Bengalese_Finches/hidden_size/hidden_size_16/Bird0/results_210531_091317/train_dur_180s/replicate_5/StandardizeSpect	0.02	2.3656974100211947	Bird0	4	hidden_size	16	Bengalese Finch	without
222	min_segment_dur_majority_vote	0.9805258324124844	1.0	0.7255330575826672	1.75075757206004	180	6	TweetyNet	results/Bengalese_Finches/hidden_size/hidden_size_16/Bird0/results_210531_091317	results/Bengalese_Finches/hidden_size/hidden_size_16/Bird0/results_210531_091317/config_BirdsongRecognition_bird00.toml	data/BirdsongRecognition/Bird0/Wave_prep_210528_224944.csv	results/Bengalese_Finches/hidden_size/hidden_size_16/Bird0/results_210531_091317/train_dur_180s/replicate_6/TweetyNet/checkpoints/max-val-acc-checkpoint.pt	results/Bengalese_Finches/hidden_size/hidden_size_16/Bird0/results_210531_091317/train_dur_180s/replicate_6/StandardizeSpect	0.02	1.9474167587515745	Bird0	4	hidden_size	16	Bengalese Finch	with
223	none	0.9765263039740544	14.51219512195122	0.5870942482475574	25.306227873311048	180	6	TweetyNet	results/Bengalese_Finches/hidden_size/hidden_size_16/Bird0/results_210531_091317	results/Bengalese_Finches/hidden_size/hidden_size_16/Bird0/results_210531_091317/config_BirdsongRecognition_bird00.toml	data/BirdsongRecognition/Bird0/Wave_prep_210528_224944.csv	results/Bengalese_Finches/hidden_size/hidden_size_16/Bird0/results_210531_091317/train_dur_180s/replicate_6/TweetyNet/checkpoints/max-val-acc-checkpoint.pt	results/Bengalese_Finches/hidden_size/hidden_size_16/Bird0/results_210531_091317/train_dur_180s/replicate_6/StandardizeSpect	0.02	2.3473696025945623	Bird0	4	hidden_size	16	Bengalese Finch	without
226	min_segment_dur_majority_vote	0.9810239947201836	1.195121951219512	0.7005220874537814	2.27165697707257	180	7	TweetyNet	results/Bengalese_Finches/hidden_size/hidden_size_16/Bird0/results_210531_091317	results/Bengalese_Finches/hidden_size/hidden_size_16/Bird0/results_210531_091317/config_BirdsongRecognition_bird00.toml	data/BirdsongRecognition/Bird0/Wave_prep_210528_224944.csv	results/Bengalese_Finches/hidden_size/hidden_size_16/Bird0/results_210531_091317/train_dur_180s/replicate_7/TweetyNet/checkpoints/max-val-acc-checkpoint.pt	results/Bengalese_Finches/hidden_size/hidden_size_16/Bird0/results_210531_091317/train_dur_180s/replicate_7/StandardizeSpect	0.02	1.8976005279816464	Bird0	4	hidden_size	16	Bengalese Finch	with
227	none	0.9785551683635352	10.585365853658535	0.611270113590247	19.81733766832475	180	7	TweetyNet	results/Bengalese_Finches/hidden_size/hidden_size_16/Bird0/results_210531_091317	results/Bengalese_Finches/hidden_size/hidden_size_16/Bird0/results_210531_091317/config_BirdsongRecognition_bird00.toml	data/BirdsongRecognition/Bird0/Wave_prep_210528_224944.csv	results/Bengalese_Finches/hidden_size/hidden_size_16/Bird0/results_210531_091317/train_dur_180s/replicate_7/TweetyNet/checkpoints/max-val-acc-checkpoint.pt	results/Bengalese_Finches/hidden_size/hidden_size_16/Bird0/results_210531_091317/train_dur_180s/replicate_7/StandardizeSpect	0.02	2.1444831636464934	Bird0	4	hidden_size	16	Bengalese Finch	without
230	min_segment_dur_majority_vote	0.979182038998156	1.2195121951219512	0.6760596704515213	2.29628804518984	180	8	TweetyNet	results/Bengalese_Finches/hidden_size/hidden_size_16/Bird0/results_210531_091317	results/Bengalese_Finches/hidden_size/hidden_size_16/Bird0/results_210531_091317/config_BirdsongRecognition_bird00.toml	data/BirdsongRecognition/Bird0/Wave_prep_210528_224944.csv	results/Bengalese_Finches/hidden_size/hidden_size_16/Bird0/results_210531_091317/train_dur_180s/replicate_8/TweetyNet/checkpoints/max-val-acc-checkpoint.pt	results/Bengalese_Finches/hidden_size/hidden_size_16/Bird0/results_210531_091317/train_dur_180s/replicate_8/StandardizeSpect	0.02	2.0817961001843965	Bird0	4	hidden_size	16	Bengalese Finch	with
231	none	0.976458262536572	10.951219512195122	0.5804060331273784	21.01650797846792	180	8	TweetyNet	results/Bengalese_Finches/hidden_size/hidden_size_16/Bird0/results_210531_091317	results/Bengalese_Finches/hidden_size/hidden_size_16/Bird0/results_210531_091317/config_BirdsongRecognition_bird00.toml	data/BirdsongRecognition/Bird0/Wave_prep_210528_224944.csv	results/Bengalese_Finches/hidden_size/hidden_size_16/Bird0/results_210531_091317/train_dur_180s/replicate_8/TweetyNet/checkpoints/max-val-acc-checkpoint.pt	results/Bengalese_Finches/hidden_size/hidden_size_16/Bird0/results_210531_091317/train_dur_180s/replicate_8/StandardizeSpect	0.02	2.3541737463428025	Bird0	4	hidden_size	16	Bengalese Finch	without
234	min_segment_dur_majority_vote	0.9801033662298514	1.048780487804878	0.6897062489622822	2.36791990671983	180	9	TweetyNet	results/Bengalese_Finches/hidden_size/hidden_size_16/Bird0/results_210531_091317	results/Bengalese_Finches/hidden_size/hidden_size_16/Bird0/results_210531_091317/config_BirdsongRecognition_bird00.toml	data/BirdsongRecognition/Bird0/Wave_prep_210528_224944.csv	results/Bengalese_Finches/hidden_size/hidden_size_16/Bird0/results_210531_091317/train_dur_180s/replicate_9/TweetyNet/checkpoints/max-val-acc-checkpoint.pt	results/Bengalese_Finches/hidden_size/hidden_size_16/Bird0/results_210531_091317/train_dur_180s/replicate_9/StandardizeSpect	0.02	1.9896633770148608	Bird0	4	hidden_size	16	Bengalese Finch	with
235	none	0.976689942978308	12.0	0.563895994308765	23.80339619827384	180	9	TweetyNet	results/Bengalese_Finches/hidden_size/hidden_size_16/Bird0/results_210531_091317	results/Bengalese_Finches/hidden_size/hidden_size_16/Bird0/results_210531_091317/config_BirdsongRecognition_bird00.toml	data/BirdsongRecognition/Bird0/Wave_prep_210528_224944.csv	results/Bengalese_Finches/hidden_size/hidden_size_16/Bird0/results_210531_091317/train_dur_180s/replicate_9/TweetyNet/checkpoints/max-val-acc-checkpoint.pt	results/Bengalese_Finches/hidden_size/hidden_size_16/Bird0/results_210531_091317/train_dur_180s/replicate_9/StandardizeSpect	0.02	2.3310057021692088	Bird0	4	hidden_size	16	Bengalese Finch	without
238	min_segment_dur_majority_vote	0.9809848305636624	1.170731707317073	0.7143893600083694	2.1050058360829698	180	10	TweetyNet	results/Bengalese_Finches/hidden_size/hidden_size_16/Bird0/results_210531_091317	results/Bengalese_Finches/hidden_size/hidden_size_16/Bird0/results_210531_091317/config_BirdsongRecognition_bird00.toml	data/BirdsongRecognition/Bird0/Wave_prep_210528_224944.csv	results/Bengalese_Finches/hidden_size/hidden_size_16/Bird0/results_210531_091317/train_dur_180s/replicate_10/TweetyNet/checkpoints/max-val-acc-checkpoint.pt	results/Bengalese_Finches/hidden_size/hidden_size_16/Bird0/results_210531_091317/train_dur_180s/replicate_10/StandardizeSpect	0.02	1.901516943633752	Bird0	4	hidden_size	16	Bengalese Finch	with
239	none	0.9779688763437124	12.21951219512195	0.5930778065616675	21.8016124952622	180	10	TweetyNet	results/Bengalese_Finches/hidden_size/hidden_size_16/Bird0/results_210531_091317	results/Bengalese_Finches/hidden_size/hidden_size_16/Bird0/results_210531_091317/config_BirdsongRecognition_bird00.toml	data/BirdsongRecognition/Bird0/Wave_prep_210528_224944.csv	results/Bengalese_Finches/hidden_size/hidden_size_16/Bird0/results_210531_091317/train_dur_180s/replicate_10/TweetyNet/checkpoints/max-val-acc-checkpoint.pt	results/Bengalese_Finches/hidden_size/hidden_size_16/Bird0/results_210531_091317/train_dur_180s/replicate_10/StandardizeSpect	0.02	2.203112365628757	Bird0	4	hidden_size	16	Bengalese Finch	without
242	min_segment_dur_majority_vote	0.9654755868795736	2.756097560975609	0.4687018694111456	5.99938663576985	45	1	TweetyNet	results/Bengalese_Finches/hidden_size/hidden_size_16/Bird0/results_210531_091317	results/Bengalese_Finches/hidden_size/hidden_size_16/Bird0/results_210531_091317/config_BirdsongRecognition_bird00.toml	data/BirdsongRecognition/Bird0/Wave_prep_210528_224944.csv	results/Bengalese_Finches/hidden_size/hidden_size_16/Bird0/results_210531_091317/train_dur_45s/replicate_1/TweetyNet/checkpoints/max-val-acc-checkpoint.pt	results/Bengalese_Finches/hidden_size/hidden_size_16/Bird0/results_210531_091317/train_dur_45s/replicate_1/StandardizeSpect	0.02	3.4524413120426534	Bird0	1	hidden_size	16	Bengalese Finch	with
243	none	0.9598495709996838	27.02439024390244	0.378959143665596	49.66347503037671	45	1	TweetyNet	results/Bengalese_Finches/hidden_size/hidden_size_16/Bird0/results_210531_091317	results/Bengalese_Finches/hidden_size/hidden_size_16/Bird0/results_210531_091317/config_BirdsongRecognition_bird00.toml	data/BirdsongRecognition/Bird0/Wave_prep_210528_224944.csv	results/Bengalese_Finches/hidden_size/hidden_size_16/Bird0/results_210531_091317/train_dur_45s/replicate_1/TweetyNet/checkpoints/max-val-acc-checkpoint.pt	results/Bengalese_Finches/hidden_size/hidden_size_16/Bird0/results_210531_091317/train_dur_45s/replicate_1/StandardizeSpect	0.02	4.015042900031618	Bird0	1	hidden_size	16	Bengalese Finch	without
246	min_segment_dur_majority_vote	0.9678936227393328	2.5609756097560976	0.5003841908911097	4.99196236027381	45	2	TweetyNet	results/Bengalese_Finches/hidden_size/hidden_size_16/Bird0/results_210531_091317	results/Bengalese_Finches/hidden_size/hidden_size_16/Bird0/results_210531_091317/config_BirdsongRecognition_bird00.toml	data/BirdsongRecognition/Bird0/Wave_prep_210528_224944.csv	results/Bengalese_Finches/hidden_size/hidden_size_16/Bird0/results_210531_091317/train_dur_45s/replicate_2/TweetyNet/checkpoints/max-val-acc-checkpoint.pt	results/Bengalese_Finches/hidden_size/hidden_size_16/Bird0/results_210531_091317/train_dur_45s/replicate_2/StandardizeSpect	0.02	3.210637726066712	Bird0	1	hidden_size	16	Bengalese Finch	with
247	none	0.9614816364417664	23.07317073170732	0.3975688215845426	42.623376062392346	45	2	TweetyNet	results/Bengalese_Finches/hidden_size/hidden_size_16/Bird0/results_210531_091317	results/Bengalese_Finches/hidden_size/hidden_size_16/Bird0/results_210531_091317/config_BirdsongRecognition_bird00.toml	data/BirdsongRecognition/Bird0/Wave_prep_210528_224944.csv	results/Bengalese_Finches/hidden_size/hidden_size_16/Bird0/results_210531_091317/train_dur_45s/replicate_2/TweetyNet/checkpoints/max-val-acc-checkpoint.pt	results/Bengalese_Finches/hidden_size/hidden_size_16/Bird0/results_210531_091317/train_dur_45s/replicate_2/StandardizeSpect	0.02	3.851836355823357	Bird0	1	hidden_size	16	Bengalese Finch	without
250	min_segment_dur_majority_vote	0.9718595328513476	2.1707317073170733	0.5703758169249096	4.04357504494238	45	3	TweetyNet	results/Bengalese_Finches/hidden_size/hidden_size_16/Bird0/results_210531_091317	results/Bengalese_Finches/hidden_size/hidden_size_16/Bird0/results_210531_091317/config_BirdsongRecognition_bird00.toml	data/BirdsongRecognition/Bird0/Wave_prep_210528_224944.csv	results/Bengalese_Finches/hidden_size/hidden_size_16/Bird0/results_210531_091317/train_dur_45s/replicate_3/TweetyNet/checkpoints/max-val-acc-checkpoint.pt	results/Bengalese_Finches/hidden_size/hidden_size_16/Bird0/results_210531_091317/train_dur_45s/replicate_3/StandardizeSpect	0.02	2.814046714865248	Bird0	1	hidden_size	16	Bengalese Finch	with
251	none	0.9656125789208486	22.634146341463413	0.4566928541361995	42.14366774214235	45	3	TweetyNet	results/Bengalese_Finches/hidden_size/hidden_size_16/Bird0/results_210531_091317	results/Bengalese_Finches/hidden_size/hidden_size_16/Bird0/results_210531_091317/config_BirdsongRecognition_bird00.toml	data/BirdsongRecognition/Bird0/Wave_prep_210528_224944.csv	results/Bengalese_Finches/hidden_size/hidden_size_16/Bird0/results_210531_091317/train_dur_45s/replicate_3/TweetyNet/checkpoints/max-val-acc-checkpoint.pt	results/Bengalese_Finches/hidden_size/hidden_size_16/Bird0/results_210531_091317/train_dur_45s/replicate_3/StandardizeSpect	0.02	3.438742107915138	Bird0	1	hidden_size	16	Bengalese Finch	without
254	min_segment_dur_majority_vote	0.9692856677713844	2.756097560975609	0.528829589364658	4.7498588030130495	45	4	TweetyNet	results/Bengalese_Finches/hidden_size/hidden_size_16/Bird0/results_210531_091317	results/Bengalese_Finches/hidden_size/hidden_size_16/Bird0/results_210531_091317/config_BirdsongRecognition_bird00.toml	data/BirdsongRecognition/Bird0/Wave_prep_210528_224944.csv	results/Bengalese_Finches/hidden_size/hidden_size_16/Bird0/results_210531_091317/train_dur_45s/replicate_4/TweetyNet/checkpoints/max-val-acc-checkpoint.pt	results/Bengalese_Finches/hidden_size/hidden_size_16/Bird0/results_210531_091317/train_dur_45s/replicate_4/StandardizeSpect	0.02	3.071433222861564	Bird0	1	hidden_size	16	Bengalese Finch	with
255	none	0.962274694219496	29.97560975609756	0.3978311009605085	53.88880422901328	45	4	TweetyNet	results/Bengalese_Finches/hidden_size/hidden_size_16/Bird0/results_210531_091317	results/Bengalese_Finches/hidden_size/hidden_size_16/Bird0/results_210531_091317/config_BirdsongRecognition_bird00.toml	data/BirdsongRecognition/Bird0/Wave_prep_210528_224944.csv	results/Bengalese_Finches/hidden_size/hidden_size_16/Bird0/results_210531_091317/train_dur_45s/replicate_4/TweetyNet/checkpoints/max-val-acc-checkpoint.pt	results/Bengalese_Finches/hidden_size/hidden_size_16/Bird0/results_210531_091317/train_dur_45s/replicate_4/StandardizeSpect	0.02	3.7725305780503926	Bird0	1	hidden_size	16	Bengalese Finch	without
258	min_segment_dur_majority_vote	0.9721340936892744	1.7804878048780488	0.5951281708732996	3.46692067145701	45	5	TweetyNet	results/Bengalese_Finches/hidden_size/hidden_size_16/Bird0/results_210531_091317	results/Bengalese_Finches/hidden_size/hidden_size_16/Bird0/results_210531_091317/config_BirdsongRecognition_bird00.toml	data/BirdsongRecognition/Bird0/Wave_prep_210528_224944.csv	results/Bengalese_Finches/hidden_size/hidden_size_16/Bird0/results_210531_091317/train_dur_45s/replicate_5/TweetyNet/checkpoints/max-val-acc-checkpoint.pt	results/Bengalese_Finches/hidden_size/hidden_size_16/Bird0/results_210531_091317/train_dur_45s/replicate_5/StandardizeSpect	0.02	2.786590631072572	Bird0	1	hidden_size	16	Bengalese Finch	with
259	none	0.9663116094475508	22.4390243902439	0.4700492135392069	42.89370858300012	45	5	TweetyNet	results/Bengalese_Finches/hidden_size/hidden_size_16/Bird0/results_210531_091317	results/Bengalese_Finches/hidden_size/hidden_size_16/Bird0/results_210531_091317/config_BirdsongRecognition_bird00.toml	data/BirdsongRecognition/Bird0/Wave_prep_210528_224944.csv	results/Bengalese_Finches/hidden_size/hidden_size_16/Bird0/results_210531_091317/train_dur_45s/replicate_5/TweetyNet/checkpoints/max-val-acc-checkpoint.pt	results/Bengalese_Finches/hidden_size/hidden_size_16/Bird0/results_210531_091317/train_dur_45s/replicate_5/StandardizeSpect	0.02	3.368839055244932	Bird0	1	hidden_size	16	Bengalese Finch	without
262	min_segment_dur_majority_vote	0.9758741495585748	1.5121951219512195	0.6492334754902521	2.63419725958456	45	6	TweetyNet	results/Bengalese_Finches/hidden_size/hidden_size_16/Bird0/results_210531_091317	results/Bengalese_Finches/hidden_size/hidden_size_16/Bird0/results_210531_091317/config_BirdsongRecognition_bird00.toml	data/BirdsongRecognition/Bird0/Wave_prep_210528_224944.csv	results/Bengalese_Finches/hidden_size/hidden_size_16/Bird0/results_210531_091317/train_dur_45s/replicate_6/TweetyNet/checkpoints/max-val-acc-checkpoint.pt	results/Bengalese_Finches/hidden_size/hidden_size_16/Bird0/results_210531_091317/train_dur_45s/replicate_6/StandardizeSpect	0.02	2.4125850441425345	Bird0	1	hidden_size	16	Bengalese Finch	with
263	none	0.9664113253443516	29.82926829268293	0.4459393486627886	56.3485223760557	45	6	TweetyNet	results/Bengalese_Finches/hidden_size/hidden_size_16/Bird0/results_210531_091317	results/Bengalese_Finches/hidden_size/hidden_size_16/Bird0/results_210531_091317/config_BirdsongRecognition_bird00.toml	data/BirdsongRecognition/Bird0/Wave_prep_210528_224944.csv	results/Bengalese_Finches/hidden_size/hidden_size_16/Bird0/results_210531_091317/train_dur_45s/replicate_6/TweetyNet/checkpoints/max-val-acc-checkpoint.pt	results/Bengalese_Finches/hidden_size/hidden_size_16/Bird0/results_210531_091317/train_dur_45s/replicate_6/StandardizeSpect	0.02	3.358867465564841	Bird0	1	hidden_size	16	Bengalese Finch	without
266	min_segment_dur_majority_vote	0.9721451990594636	1.951219512195122	0.5935806205937414	3.5408072829598	45	7	TweetyNet	results/Bengalese_Finches/hidden_size/hidden_size_16/Bird0/results_210531_091317	results/Bengalese_Finches/hidden_size/hidden_size_16/Bird0/results_210531_091317/config_BirdsongRecognition_bird00.toml	data/BirdsongRecognition/Bird0/Wave_prep_210528_224944.csv	results/Bengalese_Finches/hidden_size/hidden_size_16/Bird0/results_210531_091317/train_dur_45s/replicate_7/TweetyNet/checkpoints/max-val-acc-checkpoint.pt	results/Bengalese_Finches/hidden_size/hidden_size_16/Bird0/results_210531_091317/train_dur_45s/replicate_7/StandardizeSpect	0.02	2.785480094053628	Bird0	1	hidden_size	16	Bengalese Finch	with
267	none	0.9666251239991492	23.70731707317073	0.4639228076770502	42.192385724973256	45	7	TweetyNet	results/Bengalese_Finches/hidden_size/hidden_size_16/Bird0/results_210531_091317	results/Bengalese_Finches/hidden_size/hidden_size_16/Bird0/results_210531_091317/config_BirdsongRecognition_bird00.toml	data/BirdsongRecognition/Bird0/Wave_prep_210528_224944.csv	results/Bengalese_Finches/hidden_size/hidden_size_16/Bird0/results_210531_091317/train_dur_45s/replicate_7/TweetyNet/checkpoints/max-val-acc-checkpoint.pt	results/Bengalese_Finches/hidden_size/hidden_size_16/Bird0/results_210531_091317/train_dur_45s/replicate_7/StandardizeSpect	0.02	3.337487600085076	Bird0	1	hidden_size	16	Bengalese Finch	without
270	min_segment_dur_majority_vote	0.9712542166632044	2.073170731707317	0.5929594373345163	3.78232955953308	45	8	TweetyNet	results/Bengalese_Finches/hidden_size/hidden_size_16/Bird0/results_210531_091317	results/Bengalese_Finches/hidden_size/hidden_size_16/Bird0/results_210531_091317/config_BirdsongRecognition_bird00.toml	data/BirdsongRecognition/Bird0/Wave_prep_210528_224944.csv	results/Bengalese_Finches/hidden_size/hidden_size_16/Bird0/results_210531_091317/train_dur_45s/replicate_8/TweetyNet/checkpoints/max-val-acc-checkpoint.pt	results/Bengalese_Finches/hidden_size/hidden_size_16/Bird0/results_210531_091317/train_dur_45s/replicate_8/StandardizeSpect	0.02	2.874578333679556	Bird0	1	hidden_size	16	Bengalese Finch	with
271	none	0.9642345702481272	27.902439024390244	0.445896731523148	51.91083494976832	45	8	TweetyNet	results/Bengalese_Finches/hidden_size/hidden_size_16/Bird0/results_210531_091317	results/Bengalese_Finches/hidden_size/hidden_size_16/Bird0/results_210531_091317/config_BirdsongRecognition_bird00.toml	data/BirdsongRecognition/Bird0/Wave_prep_210528_224944.csv	results/Bengalese_Finches/hidden_size/hidden_size_16/Bird0/results_210531_091317/train_dur_45s/replicate_8/TweetyNet/checkpoints/max-val-acc-checkpoint.pt	results/Bengalese_Finches/hidden_size/hidden_size_16/Bird0/results_210531_091317/train_dur_45s/replicate_8/StandardizeSpect	0.02	3.576542975187292	Bird0	1	hidden_size	16	Bengalese Finch	without
274	min_segment_dur_majority_vote	0.9711080903667588	1.951219512195122	0.5366176052991367	4.28597400875971	45	9	TweetyNet	results/Bengalese_Finches/hidden_size/hidden_size_16/Bird0/results_210531_091317	results/Bengalese_Finches/hidden_size/hidden_size_16/Bird0/results_210531_091317/config_BirdsongRecognition_bird00.toml	data/BirdsongRecognition/Bird0/Wave_prep_210528_224944.csv	results/Bengalese_Finches/hidden_size/hidden_size_16/Bird0/results_210531_091317/train_dur_45s/replicate_9/TweetyNet/checkpoints/max-val-acc-checkpoint.pt	results/Bengalese_Finches/hidden_size/hidden_size_16/Bird0/results_210531_091317/train_dur_45s/replicate_9/StandardizeSpect	0.02	2.8891909633241286	Bird0	1	hidden_size	16	Bengalese Finch	with
275	none	0.9652107456949656	26.682926829268293	0.4139148574055151	53.1455703117405	45	9	TweetyNet	results/Bengalese_Finches/hidden_size/hidden_size_16/Bird0/results_210531_091317	results/Bengalese_Finches/hidden_size/hidden_size_16/Bird0/results_210531_091317/config_BirdsongRecognition_bird00.toml	data/BirdsongRecognition/Bird0/Wave_prep_210528_224944.csv	results/Bengalese_Finches/hidden_size/hidden_size_16/Bird0/results_210531_091317/train_dur_45s/replicate_9/TweetyNet/checkpoints/max-val-acc-checkpoint.pt	results/Bengalese_Finches/hidden_size/hidden_size_16/Bird0/results_210531_091317/train_dur_45s/replicate_9/StandardizeSpect	0.02	3.4789254305034323	Bird0	1	hidden_size	16	Bengalese Finch	without
278	min_segment_dur_majority_vote	0.9700839894545008	2.024390243902439	0.6000044098542988	4.19300460093888	45	10	TweetyNet	results/Bengalese_Finches/hidden_size/hidden_size_16/Bird0/results_210531_091317	results/Bengalese_Finches/hidden_size/hidden_size_16/Bird0/results_210531_091317/config_BirdsongRecognition_bird00.toml	data/BirdsongRecognition/Bird0/Wave_prep_210528_224944.csv	results/Bengalese_Finches/hidden_size/hidden_size_16/Bird0/results_210531_091317/train_dur_45s/replicate_10/TweetyNet/checkpoints/max-val-acc-checkpoint.pt	results/Bengalese_Finches/hidden_size/hidden_size_16/Bird0/results_210531_091317/train_dur_45s/replicate_10/StandardizeSpect	0.02	2.9916010545499305	Bird0	1	hidden_size	16	Bengalese Finch	with
279	none	0.9616772102384626	28.341463414634145	0.4243449067274583	52.45283728845834	45	10	TweetyNet	results/Bengalese_Finches/hidden_size/hidden_size_16/Bird0/results_210531_091317	results/Bengalese_Finches/hidden_size/hidden_size_16/Bird0/results_210531_091317/config_BirdsongRecognition_bird00.toml	data/BirdsongRecognition/Bird0/Wave_prep_210528_224944.csv	results/Bengalese_Finches/hidden_size/hidden_size_16/Bird0/results_210531_091317/train_dur_45s/replicate_10/TweetyNet/checkpoints/max-val-acc-checkpoint.pt	results/Bengalese_Finches/hidden_size/hidden_size_16/Bird0/results_210531_091317/train_dur_45s/replicate_10/StandardizeSpect	0.02	3.832278976153736	Bird0	1	hidden_size	16	Bengalese Finch	without
282	min_segment_dur_majority_vote	0.9756470837525728	0.7631578947368421	0.7510103183326838	1.35627921366584	75	1	TweetyNet	results/Bengalese_Finches/hidden_size/hidden_size_16/Bird4/results_210531_143217	results/Bengalese_Finches/hidden_size/hidden_size_16/Bird4/results_210531_143217/config_BirdsongRecognition_bird04.toml	data/BirdsongRecognition/Bird4/Wave_prep_210528_224959.csv	results/Bengalese_Finches/hidden_size/hidden_size_16/Bird4/results_210531_143217/train_dur_75s/replicate_1/TweetyNet/checkpoints/max-val-acc-checkpoint.pt	results/Bengalese_Finches/hidden_size/hidden_size_16/Bird4/results_210531_143217/train_dur_75s/replicate_1/StandardizeSpect	0.02	2.4352916247427303	Bird4	2	hidden_size	16	Bengalese Finch	with
283	none	0.9733458716635404	9.31578947368421	0.6765256277090081	15.175282560109672	75	1	TweetyNet	results/Bengalese_Finches/hidden_size/hidden_size_16/Bird4/results_210531_143217	results/Bengalese_Finches/hidden_size/hidden_size_16/Bird4/results_210531_143217/config_BirdsongRecognition_bird04.toml	data/BirdsongRecognition/Bird4/Wave_prep_210528_224959.csv	results/Bengalese_Finches/hidden_size/hidden_size_16/Bird4/results_210531_143217/train_dur_75s/replicate_1/TweetyNet/checkpoints/max-val-acc-checkpoint.pt	results/Bengalese_Finches/hidden_size/hidden_size_16/Bird4/results_210531_143217/train_dur_75s/replicate_1/StandardizeSpect	0.02	2.6654128336459526	Bird4	2	hidden_size	16	Bengalese Finch	without
286	min_segment_dur_majority_vote	0.9767069490670016	0.7631578947368421	0.7567786860238995	1.37830746296704	75	2	TweetyNet	results/Bengalese_Finches/hidden_size/hidden_size_16/Bird4/results_210531_143217	results/Bengalese_Finches/hidden_size/hidden_size_16/Bird4/results_210531_143217/config_BirdsongRecognition_bird04.toml	data/BirdsongRecognition/Bird4/Wave_prep_210528_224959.csv	results/Bengalese_Finches/hidden_size/hidden_size_16/Bird4/results_210531_143217/train_dur_75s/replicate_2/TweetyNet/checkpoints/max-val-acc-checkpoint.pt	results/Bengalese_Finches/hidden_size/hidden_size_16/Bird4/results_210531_143217/train_dur_75s/replicate_2/StandardizeSpect	0.02	2.3293050932998383	Bird4	2	hidden_size	16	Bengalese Finch	with
287	none	0.9739990597223848	10.578947368421051	0.6651552556955588	17.1253840290717	75	2	TweetyNet	results/Bengalese_Finches/hidden_size/hidden_size_16/Bird4/results_210531_143217	results/Bengalese_Finches/hidden_size/hidden_size_16/Bird4/results_210531_143217/config_BirdsongRecognition_bird04.toml	data/BirdsongRecognition/Bird4/Wave_prep_210528_224959.csv	results/Bengalese_Finches/hidden_size/hidden_size_16/Bird4/results_210531_143217/train_dur_75s/replicate_2/TweetyNet/checkpoints/max-val-acc-checkpoint.pt	results/Bengalese_Finches/hidden_size/hidden_size_16/Bird4/results_210531_143217/train_dur_75s/replicate_2/StandardizeSpect	0.02	2.6000940277615348	Bird4	2	hidden_size	16	Bengalese Finch	without
290	min_segment_dur_majority_vote	0.9770273072940996	0.7894736842105263	0.7574763915376185	1.35289094637751	75	3	TweetyNet	results/Bengalese_Finches/hidden_size/hidden_size_16/Bird4/results_210531_143217	results/Bengalese_Finches/hidden_size/hidden_size_16/Bird4/results_210531_143217/config_BirdsongRecognition_bird04.toml	data/BirdsongRecognition/Bird4/Wave_prep_210528_224959.csv	results/Bengalese_Finches/hidden_size/hidden_size_16/Bird4/results_210531_143217/train_dur_75s/replicate_3/TweetyNet/checkpoints/max-val-acc-checkpoint.pt	results/Bengalese_Finches/hidden_size/hidden_size_16/Bird4/results_210531_143217/train_dur_75s/replicate_3/StandardizeSpect	0.02	2.297269270590041	Bird4	2	hidden_size	16	Bengalese Finch	with
291	none	0.9741718327355064	9.578947368421051	0.6658955724952289	15.16848842362072	75	3	TweetyNet	results/Bengalese_Finches/hidden_size/hidden_size_16/Bird4/results_210531_143217	results/Bengalese_Finches/hidden_size/hidden_size_16/Bird4/results_210531_143217/config_BirdsongRecognition_bird04.toml	data/BirdsongRecognition/Bird4/Wave_prep_210528_224959.csv	results/Bengalese_Finches/hidden_size/hidden_size_16/Bird4/results_210531_143217/train_dur_75s/replicate_3/TweetyNet/checkpoints/max-val-acc-checkpoint.pt	results/Bengalese_Finches/hidden_size/hidden_size_16/Bird4/results_210531_143217/train_dur_75s/replicate_3/StandardizeSpect	0.02	2.582816726449355	Bird4	2	hidden_size	16	Bengalese Finch	without
294	min_segment_dur_majority_vote	0.9750698979553704	1.0526315789473684	0.7159833993499783	1.75466985278716	75	4	TweetyNet	results/Bengalese_Finches/hidden_size/hidden_size_16/Bird4/results_210531_143217	results/Bengalese_Finches/hidden_size/hidden_size_16/Bird4/results_210531_143217/config_BirdsongRecognition_bird04.toml	data/BirdsongRecognition/Bird4/Wave_prep_210528_224959.csv	results/Bengalese_Finches/hidden_size/hidden_size_16/Bird4/results_210531_143217/train_dur_75s/replicate_4/TweetyNet/checkpoints/max-val-acc-checkpoint.pt	results/Bengalese_Finches/hidden_size/hidden_size_16/Bird4/results_210531_143217/train_dur_75s/replicate_4/StandardizeSpect	0.02	2.493010204462953	Bird4	2	hidden_size	16	Bengalese Finch	with
295	none	0.9721898494699482	11.86842105263158	0.631795449107653	18.924693246469808	75	4	TweetyNet	results/Bengalese_Finches/hidden_size/hidden_size_16/Bird4/results_210531_143217	results/Bengalese_Finches/hidden_size/hidden_size_16/Bird4/results_210531_143217/config_BirdsongRecognition_bird04.toml	data/BirdsongRecognition/Bird4/Wave_prep_210528_224959.csv	results/Bengalese_Finches/hidden_size/hidden_size_16/Bird4/results_210531_143217/train_dur_75s/replicate_4/TweetyNet/checkpoints/max-val-acc-checkpoint.pt	results/Bengalese_Finches/hidden_size/hidden_size_16/Bird4/results_210531_143217/train_dur_75s/replicate_4/StandardizeSpect	0.02	2.781015053005176	Bird4	2	hidden_size	16	Bengalese Finch	without
298	min_segment_dur_majority_vote	0.9762794100791394	0.8421052631578947	0.7687945833721744	1.45554317865642	75	5	TweetyNet	results/Bengalese_Finches/hidden_size/hidden_size_16/Bird4/results_210531_143217	results/Bengalese_Finches/hidden_size/hidden_size_16/Bird4/results_210531_143217/config_BirdsongRecognition_bird04.toml	data/BirdsongRecognition/Bird4/Wave_prep_210528_224959.csv	results/Bengalese_Finches/hidden_size/hidden_size_16/Bird4/results_210531_143217/train_dur_75s/replicate_5/TweetyNet/checkpoints/max-val-acc-checkpoint.pt	results/Bengalese_Finches/hidden_size/hidden_size_16/Bird4/results_210531_143217/train_dur_75s/replicate_5/StandardizeSpect	0.02	2.372058992086057	Bird4	2	hidden_size	16	Bengalese Finch	with
299	none	0.9738303568376456	12.894736842105264	0.6779322219182294	20.29090626284346	75	5	TweetyNet	results/Bengalese_Finches/hidden_size/hidden_size_16/Bird4/results_210531_143217	results/Bengalese_Finches/hidden_size/hidden_size_16/Bird4/results_210531_143217/config_BirdsongRecognition_bird04.toml	data/BirdsongRecognition/Bird4/Wave_prep_210528_224959.csv	results/Bengalese_Finches/hidden_size/hidden_size_16/Bird4/results_210531_143217/train_dur_75s/replicate_5/TweetyNet/checkpoints/max-val-acc-checkpoint.pt	results/Bengalese_Finches/hidden_size/hidden_size_16/Bird4/results_210531_143217/train_dur_75s/replicate_5/StandardizeSpect	0.02	2.616964316235426	Bird4	2	hidden_size	16	Bengalese Finch	without
302	min_segment_dur_majority_vote	0.9772207226290336	0.7368421052631579	0.7669437000297767	1.20671924251241	75	6	TweetyNet	results/Bengalese_Finches/hidden_size/hidden_size_16/Bird4/results_210531_143217	results/Bengalese_Finches/hidden_size/hidden_size_16/Bird4/results_210531_143217/config_BirdsongRecognition_bird04.toml	data/BirdsongRecognition/Bird4/Wave_prep_210528_224959.csv	results/Bengalese_Finches/hidden_size/hidden_size_16/Bird4/results_210531_143217/train_dur_75s/replicate_6/TweetyNet/checkpoints/max-val-acc-checkpoint.pt	results/Bengalese_Finches/hidden_size/hidden_size_16/Bird4/results_210531_143217/train_dur_75s/replicate_6/StandardizeSpect	0.02	2.277927737096652	Bird4	2	hidden_size	16	Bengalese Finch	with
303	none	0.9750223881818056	10.210526315789474	0.6856787195735045	15.87477414859698	75	6	TweetyNet	results/Bengalese_Finches/hidden_size/hidden_size_16/Bird4/results_210531_143217	results/Bengalese_Finches/hidden_size/hidden_size_16/Bird4/results_210531_143217/config_BirdsongRecognition_bird04.toml	data/BirdsongRecognition/Bird4/Wave_prep_210528_224959.csv	results/Bengalese_Finches/hidden_size/hidden_size_16/Bird4/results_210531_143217/train_dur_75s/replicate_6/TweetyNet/checkpoints/max-val-acc-checkpoint.pt	results/Bengalese_Finches/hidden_size/hidden_size_16/Bird4/results_210531_143217/train_dur_75s/replicate_6/StandardizeSpect	0.02	2.4977611818194467	Bird4	2	hidden_size	16	Bengalese Finch	without
306	min_segment_dur_majority_vote	0.9753204050219116	0.9736842105263158	0.7109820251336283	1.87661300665239	75	7	TweetyNet	results/Bengalese_Finches/hidden_size/hidden_size_16/Bird4/results_210531_143217	results/Bengalese_Finches/hidden_size/hidden_size_16/Bird4/results_210531_143217/config_BirdsongRecognition_bird04.toml	data/BirdsongRecognition/Bird4/Wave_prep_210528_224959.csv	results/Bengalese_Finches/hidden_size/hidden_size_16/Bird4/results_210531_143217/train_dur_75s/replicate_7/TweetyNet/checkpoints/max-val-acc-checkpoint.pt	results/Bengalese_Finches/hidden_size/hidden_size_16/Bird4/results_210531_143217/train_dur_75s/replicate_7/StandardizeSpect	0.02	2.467959497808836	Bird4	2	hidden_size	16	Bengalese Finch	with
307	none	0.973715976252036	8.868421052631579	0.6518207204559402	15.125511742519729	75	7	TweetyNet	results/Bengalese_Finches/hidden_size/hidden_size_16/Bird4/results_210531_143217	results/Bengalese_Finches/hidden_size/hidden_size_16/Bird4/results_210531_143217/config_BirdsongRecognition_bird04.toml	data/BirdsongRecognition/Bird4/Wave_prep_210528_224959.csv	results/Bengalese_Finches/hidden_size/hidden_size_16/Bird4/results_210531_143217/train_dur_75s/replicate_7/TweetyNet/checkpoints/max-val-acc-checkpoint.pt	results/Bengalese_Finches/hidden_size/hidden_size_16/Bird4/results_210531_143217/train_dur_75s/replicate_7/StandardizeSpect	0.02	2.6284023747964125	Bird4	2	hidden_size	16	Bengalese Finch	without
310	min_segment_dur_majority_vote	0.97840622234036	0.6052631578947368	0.7999898061880145	0.97590605539045	75	8	TweetyNet	results/Bengalese_Finches/hidden_size/hidden_size_16/Bird4/results_210531_143217	results/Bengalese_Finches/hidden_size/hidden_size_16/Bird4/results_210531_143217/config_BirdsongRecognition_bird04.toml	data/BirdsongRecognition/Bird4/Wave_prep_210528_224959.csv	results/Bengalese_Finches/hidden_size/hidden_size_16/Bird4/results_210531_143217/train_dur_75s/replicate_8/TweetyNet/checkpoints/max-val-acc-checkpoint.pt	results/Bengalese_Finches/hidden_size/hidden_size_16/Bird4/results_210531_143217/train_dur_75s/replicate_8/StandardizeSpect	0.02	2.159377765963999	Bird4	2	hidden_size	16	Bengalese Finch	with
311	none	0.9752417401502242	10.578947368421051	0.6954530334937694	16.13655290498754	75	8	TweetyNet	results/Bengalese_Finches/hidden_size/hidden_size_16/Bird4/results_210531_143217	results/Bengalese_Finches/hidden_size/hidden_size_16/Bird4/results_210531_143217/config_BirdsongRecognition_bird04.toml	data/BirdsongRecognition/Bird4/Wave_prep_210528_224959.csv	results/Bengalese_Finches/hidden_size/hidden_size_16/Bird4/results_210531_143217/train_dur_75s/replicate_8/TweetyNet/checkpoints/max-val-acc-checkpoint.pt	results/Bengalese_Finches/hidden_size/hidden_size_16/Bird4/results_210531_143217/train_dur_75s/replicate_8/StandardizeSpect	0.02	2.4758259849775754	Bird4	2	hidden_size	16	Bengalese Finch	without
314	min_segment_dur_majority_vote	0.9777235448702474	0.6842105263157895	0.7738834220699656	1.22867824040755	75	9	TweetyNet	results/Bengalese_Finches/hidden_size/hidden_size_16/Bird4/results_210531_143217	results/Bengalese_Finches/hidden_size/hidden_size_16/Bird4/results_210531_143217/config_BirdsongRecognition_bird04.toml	data/BirdsongRecognition/Bird4/Wave_prep_210528_224959.csv	results/Bengalese_Finches/hidden_size/hidden_size_16/Bird4/results_210531_143217/train_dur_75s/replicate_9/TweetyNet/checkpoints/max-val-acc-checkpoint.pt	results/Bengalese_Finches/hidden_size/hidden_size_16/Bird4/results_210531_143217/train_dur_75s/replicate_9/StandardizeSpect	0.02	2.2276455129752626	Bird4	2	hidden_size	16	Bengalese Finch	with
315	none	0.97525004317095	8.31578947368421	0.6851198349740258	13.462911567721788	75	9	TweetyNet	results/Bengalese_Finches/hidden_size/hidden_size_16/Bird4/results_210531_143217	results/Bengalese_Finches/hidden_size/hidden_size_16/Bird4/results_210531_143217/config_BirdsongRecognition_bird04.toml	data/BirdsongRecognition/Bird4/Wave_prep_210528_224959.csv	results/Bengalese_Finches/hidden_size/hidden_size_16/Bird4/results_210531_143217/train_dur_75s/replicate_9/TweetyNet/checkpoints/max-val-acc-checkpoint.pt	results/Bengalese_Finches/hidden_size/hidden_size_16/Bird4/results_210531_143217/train_dur_75s/replicate_9/StandardizeSpect	0.02	2.4749956829050013	Bird4	2	hidden_size	16	Bengalese Finch	without
318	min_segment_dur_majority_vote	0.9749216347127004	1.0263157894736843	0.6978281744100725	1.7301583576788502	75	10	TweetyNet	results/Bengalese_Finches/hidden_size/hidden_size_16/Bird4/results_210531_143217	results/Bengalese_Finches/hidden_size/hidden_size_16/Bird4/results_210531_143217/config_BirdsongRecognition_bird04.toml	data/BirdsongRecognition/Bird4/Wave_prep_210528_224959.csv	results/Bengalese_Finches/hidden_size/hidden_size_16/Bird4/results_210531_143217/train_dur_75s/replicate_10/TweetyNet/checkpoints/max-val-acc-checkpoint.pt	results/Bengalese_Finches/hidden_size/hidden_size_16/Bird4/results_210531_143217/train_dur_75s/replicate_10/StandardizeSpect	0.02	2.5078365287299453	Bird4	2	hidden_size	16	Bengalese Finch	with
319	none	0.972719449975927	8.81578947368421	0.6203127053227597	14.197817854914629	75	10	TweetyNet	results/Bengalese_Finches/hidden_size/hidden_size_16/Bird4/results_210531_143217	results/Bengalese_Finches/hidden_size/hidden_size_16/Bird4/results_210531_143217/config_BirdsongRecognition_bird04.toml	data/BirdsongRecognition/Bird4/Wave_prep_210528_224959.csv	results/Bengalese_Finches/hidden_size/hidden_size_16/Bird4/results_210531_143217/train_dur_75s/replicate_10/TweetyNet/checkpoints/max-val-acc-checkpoint.pt	results/Bengalese_Finches/hidden_size/hidden_size_16/Bird4/results_210531_143217/train_dur_75s/replicate_10/StandardizeSpect	0.02	2.728055002407304	Bird4	2	hidden_size	16	Bengalese Finch	without
322	min_segment_dur_majority_vote	0.9782480291156884	0.5789473684210527	0.7946122532847566	1.01678551621229	120	1	TweetyNet	results/Bengalese_Finches/hidden_size/hidden_size_16/Bird4/results_210531_143217	results/Bengalese_Finches/hidden_size/hidden_size_16/Bird4/results_210531_143217/config_BirdsongRecognition_bird04.toml	data/BirdsongRecognition/Bird4/Wave_prep_210528_224959.csv	results/Bengalese_Finches/hidden_size/hidden_size_16/Bird4/results_210531_143217/train_dur_120s/replicate_1/TweetyNet/checkpoints/max-val-acc-checkpoint.pt	results/Bengalese_Finches/hidden_size/hidden_size_16/Bird4/results_210531_143217/train_dur_120s/replicate_1/StandardizeSpect	0.02	2.1751970884311578	Bird4	3	hidden_size	16	Bengalese Finch	with
323	none	0.9763856828025332	8.921052631578947	0.7236681107637213	13.60805754541168	120	1	TweetyNet	results/Bengalese_Finches/hidden_size/hidden_size_16/Bird4/results_210531_143217	results/Bengalese_Finches/hidden_size/hidden_size_16/Bird4/results_210531_143217/config_BirdsongRecognition_bird04.toml	data/BirdsongRecognition/Bird4/Wave_prep_210528_224959.csv	results/Bengalese_Finches/hidden_size/hidden_size_16/Bird4/results_210531_143217/train_dur_120s/replicate_1/TweetyNet/checkpoints/max-val-acc-checkpoint.pt	results/Bengalese_Finches/hidden_size/hidden_size_16/Bird4/results_210531_143217/train_dur_120s/replicate_1/StandardizeSpect	0.02	2.361431719746676	Bird4	3	hidden_size	16	Bengalese Finch	without
326	min_segment_dur_majority_vote	0.978090149384965	0.6578947368421053	0.7726573981832798	1.25598651809688	120	2	TweetyNet	results/Bengalese_Finches/hidden_size/hidden_size_16/Bird4/results_210531_143217	results/Bengalese_Finches/hidden_size/hidden_size_16/Bird4/results_210531_143217/config_BirdsongRecognition_bird04.toml	data/BirdsongRecognition/Bird4/Wave_prep_210528_224959.csv	results/Bengalese_Finches/hidden_size/hidden_size_16/Bird4/results_210531_143217/train_dur_120s/replicate_2/TweetyNet/checkpoints/max-val-acc-checkpoint.pt	results/Bengalese_Finches/hidden_size/hidden_size_16/Bird4/results_210531_143217/train_dur_120s/replicate_2/StandardizeSpect	0.02	2.190985061503503	Bird4	3	hidden_size	16	Bengalese Finch	with
327	none	0.9763890496673384	7.236842105263157	0.7052599696481174	11.58435320621073	120	2	TweetyNet	results/Bengalese_Finches/hidden_size/hidden_size_16/Bird4/results_210531_143217	results/Bengalese_Finches/hidden_size/hidden_size_16/Bird4/results_210531_143217/config_BirdsongRecognition_bird04.toml	data/BirdsongRecognition/Bird4/Wave_prep_210528_224959.csv	results/Bengalese_Finches/hidden_size/hidden_size_16/Bird4/results_210531_143217/train_dur_120s/replicate_2/TweetyNet/checkpoints/max-val-acc-checkpoint.pt	results/Bengalese_Finches/hidden_size/hidden_size_16/Bird4/results_210531_143217/train_dur_120s/replicate_2/StandardizeSpect	0.02	2.361095033266169	Bird4	3	hidden_size	16	Bengalese Finch	without
330	min_segment_dur_majority_vote	0.977123434062019	0.8157894736842105	0.7414729944865535	1.46091358464168	120	3	TweetyNet	results/Bengalese_Finches/hidden_size/hidden_size_16/Bird4/results_210531_143217	results/Bengalese_Finches/hidden_size/hidden_size_16/Bird4/results_210531_143217/config_BirdsongRecognition_bird04.toml	data/BirdsongRecognition/Bird4/Wave_prep_210528_224959.csv	results/Bengalese_Finches/hidden_size/hidden_size_16/Bird4/results_210531_143217/train_dur_120s/replicate_3/TweetyNet/checkpoints/max-val-acc-checkpoint.pt	results/Bengalese_Finches/hidden_size/hidden_size_16/Bird4/results_210531_143217/train_dur_120s/replicate_3/StandardizeSpect	0.02	2.287656593798104	Bird4	3	hidden_size	16	Bengalese Finch	with
331	none	0.975393791760495	8.18421052631579	0.6817735714059658	13.53341372523958	120	3	TweetyNet	results/Bengalese_Finches/hidden_size/hidden_size_16/Bird4/results_210531_143217	results/Bengalese_Finches/hidden_size/hidden_size_16/Bird4/results_210531_143217/config_BirdsongRecognition_bird04.toml	data/BirdsongRecognition/Bird4/Wave_prep_210528_224959.csv	results/Bengalese_Finches/hidden_size/hidden_size_16/Bird4/results_210531_143217/train_dur_120s/replicate_3/TweetyNet/checkpoints/max-val-acc-checkpoint.pt	results/Bengalese_Finches/hidden_size/hidden_size_16/Bird4/results_210531_143217/train_dur_120s/replicate_3/StandardizeSpect	0.02	2.460620823950499	Bird4	3	hidden_size	16	Bengalese Finch	without
334	min_segment_dur_majority_vote	0.9783668272281528	0.7105263157894737	0.765970788329958	1.25911975568496	120	4	TweetyNet	results/Bengalese_Finches/hidden_size/hidden_size_16/Bird4/results_210531_143217	results/Bengalese_Finches/hidden_size/hidden_size_16/Bird4/results_210531_143217/config_BirdsongRecognition_bird04.toml	data/BirdsongRecognition/Bird4/Wave_prep_210528_224959.csv	results/Bengalese_Finches/hidden_size/hidden_size_16/Bird4/results_210531_143217/train_dur_120s/replicate_4/TweetyNet/checkpoints/max-val-acc-checkpoint.pt	results/Bengalese_Finches/hidden_size/hidden_size_16/Bird4/results_210531_143217/train_dur_120s/replicate_4/StandardizeSpect	0.02	2.1633172771847287	Bird4	3	hidden_size	16	Bengalese Finch	with
335	none	0.9762217699718752	7.394736842105263	0.695620868107077	11.93327253348867	120	4	TweetyNet	results/Bengalese_Finches/hidden_size/hidden_size_16/Bird4/results_210531_143217	results/Bengalese_Finches/hidden_size/hidden_size_16/Bird4/results_210531_143217/config_BirdsongRecognition_bird04.toml	data/BirdsongRecognition/Bird4/Wave_prep_210528_224959.csv	results/Bengalese_Finches/hidden_size/hidden_size_16/Bird4/results_210531_143217/train_dur_120s/replicate_4/TweetyNet/checkpoints/max-val-acc-checkpoint.pt	results/Bengalese_Finches/hidden_size/hidden_size_16/Bird4/results_210531_143217/train_dur_120s/replicate_4/StandardizeSpect	0.02	2.3778230028124847	Bird4	3	hidden_size	16	Bengalese Finch	without
338	min_segment_dur_majority_vote	0.976723932889086	0.7631578947368421	0.7516639726215141	1.33097058625033	120	5	TweetyNet	results/Bengalese_Finches/hidden_size/hidden_size_16/Bird4/results_210531_143217	results/Bengalese_Finches/hidden_size/hidden_size_16/Bird4/results_210531_143217/config_BirdsongRecognition_bird04.toml	data/BirdsongRecognition/Bird4/Wave_prep_210528_224959.csv	results/Bengalese_Finches/hidden_size/hidden_size_16/Bird4/results_210531_143217/train_dur_120s/replicate_5/TweetyNet/checkpoints/max-val-acc-checkpoint.pt	results/Bengalese_Finches/hidden_size/hidden_size_16/Bird4/results_210531_143217/train_dur_120s/replicate_5/StandardizeSpect	0.02	2.32760671109139	Bird4	3	hidden_size	16	Bengalese Finch	with
339	none	0.9751979657649992	6.894736842105263	0.6962217273595999	10.82461077173272	120	5	TweetyNet	results/Bengalese_Finches/hidden_size/hidden_size_16/Bird4/results_210531_143217	results/Bengalese_Finches/hidden_size/hidden_size_16/Bird4/results_210531_143217/config_BirdsongRecognition_bird04.toml	data/BirdsongRecognition/Bird4/Wave_prep_210528_224959.csv	results/Bengalese_Finches/hidden_size/hidden_size_16/Bird4/results_210531_143217/train_dur_120s/replicate_5/TweetyNet/checkpoints/max-val-acc-checkpoint.pt	results/Bengalese_Finches/hidden_size/hidden_size_16/Bird4/results_210531_143217/train_dur_120s/replicate_5/StandardizeSpect	0.02	2.4802034235000936	Bird4	3	hidden_size	16	Bengalese Finch	without
342	min_segment_dur_majority_vote	0.9770227928376528	0.8421052631578947	0.7490593992259515	1.42136959103959	120	6	TweetyNet	results/Bengalese_Finches/hidden_size/hidden_size_16/Bird4/results_210531_143217	results/Bengalese_Finches/hidden_size/hidden_size_16/Bird4/results_210531_143217/config_BirdsongRecognition_bird04.toml	data/BirdsongRecognition/Bird4/Wave_prep_210528_224959.csv	results/Bengalese_Finches/hidden_size/hidden_size_16/Bird4/results_210531_143217/train_dur_120s/replicate_6/TweetyNet/checkpoints/max-val-acc-checkpoint.pt	results/Bengalese_Finches/hidden_size/hidden_size_16/Bird4/results_210531_143217/train_dur_120s/replicate_6/StandardizeSpect	0.02	2.29772071623473	Bird4	3	hidden_size	16	Bengalese Finch	with
343	none	0.9751947570021916	9.13157894736842	0.6776259154253204	14.33859226843373	120	6	TweetyNet	results/Bengalese_Finches/hidden_size/hidden_size_16/Bird4/results_210531_143217	results/Bengalese_Finches/hidden_size/hidden_size_16/Bird4/results_210531_143217/config_BirdsongRecognition_bird04.toml	data/BirdsongRecognition/Bird4/Wave_prep_210528_224959.csv	results/Bengalese_Finches/hidden_size/hidden_size_16/Bird4/results_210531_143217/train_dur_120s/replicate_6/TweetyNet/checkpoints/max-val-acc-checkpoint.pt	results/Bengalese_Finches/hidden_size/hidden_size_16/Bird4/results_210531_143217/train_dur_120s/replicate_6/StandardizeSpect	0.02	2.4805242997808508	Bird4	3	hidden_size	16	Bengalese Finch	without
346	min_segment_dur_majority_vote	0.9785553723002696	0.631578947368421	0.7845527340905314	1.10580657816941	120	7	TweetyNet	results/Bengalese_Finches/hidden_size/hidden_size_16/Bird4/results_210531_143217	results/Bengalese_Finches/hidden_size/hidden_size_16/Bird4/results_210531_143217/config_BirdsongRecognition_bird04.toml	data/BirdsongRecognition/Bird4/Wave_prep_210528_224959.csv	results/Bengalese_Finches/hidden_size/hidden_size_16/Bird4/results_210531_143217/train_dur_120s/replicate_7/TweetyNet/checkpoints/max-val-acc-checkpoint.pt	results/Bengalese_Finches/hidden_size/hidden_size_16/Bird4/results_210531_143217/train_dur_120s/replicate_7/StandardizeSpect	0.02	2.1444627699730434	Bird4	3	hidden_size	16	Bengalese Finch	with
347	none	0.9767048535510968	7.052631578947368	0.7126805842320326	11.05002672192431	120	7	TweetyNet	results/Bengalese_Finches/hidden_size/hidden_size_16/Bird4/results_210531_143217	results/Bengalese_Finches/hidden_size/hidden_size_16/Bird4/results_210531_143217/config_BirdsongRecognition_bird04.toml	data/BirdsongRecognition/Bird4/Wave_prep_210528_224959.csv	results/Bengalese_Finches/hidden_size/hidden_size_16/Bird4/results_210531_143217/train_dur_120s/replicate_7/TweetyNet/checkpoints/max-val-acc-checkpoint.pt	results/Bengalese_Finches/hidden_size/hidden_size_16/Bird4/results_210531_143217/train_dur_120s/replicate_7/StandardizeSpect	0.02	2.329514644890329	Bird4	3	hidden_size	16	Bengalese Finch	without
350	min_segment_dur_majority_vote	0.9766950541630408	0.8157894736842105	0.7431361650173105	1.52856431267404	120	8	TweetyNet	results/Bengalese_Finches/hidden_size/hidden_size_16/Bird4/results_210531_143217	results/Bengalese_Finches/hidden_size/hidden_size_16/Bird4/results_210531_143217/config_BirdsongRecognition_bird04.toml	data/BirdsongRecognition/Bird4/Wave_prep_210528_224959.csv	results/Bengalese_Finches/hidden_size/hidden_size_16/Bird4/results_210531_143217/train_dur_120s/replicate_8/TweetyNet/checkpoints/max-val-acc-checkpoint.pt	results/Bengalese_Finches/hidden_size/hidden_size_16/Bird4/results_210531_143217/train_dur_120s/replicate_8/StandardizeSpect	0.02	2.33049458369593	Bird4	3	hidden_size	16	Bengalese Finch	with
351	none	0.9749597467182304	8.736842105263158	0.6784594603121871	14.07218602363404	120	8	TweetyNet	results/Bengalese_Finches/hidden_size/hidden_size_16/Bird4/results_210531_143217	results/Bengalese_Finches/hidden_size/hidden_size_16/Bird4/results_210531_143217/config_BirdsongRecognition_bird04.toml	data/BirdsongRecognition/Bird4/Wave_prep_210528_224959.csv	results/Bengalese_Finches/hidden_size/hidden_size_16/Bird4/results_210531_143217/train_dur_120s/replicate_8/TweetyNet/checkpoints/max-val-acc-checkpoint.pt	results/Bengalese_Finches/hidden_size/hidden_size_16/Bird4/results_210531_143217/train_dur_120s/replicate_8/StandardizeSpect	0.02	2.504025328176973	Bird4	3	hidden_size	16	Bengalese Finch	without
354	min_segment_dur_majority_vote	0.9767136654090064	0.7894736842105263	0.7303829534812283	1.38180243334418	120	9	TweetyNet	results/Bengalese_Finches/hidden_size/hidden_size_16/Bird4/results_210531_143217	results/Bengalese_Finches/hidden_size/hidden_size_16/Bird4/results_210531_143217/config_BirdsongRecognition_bird04.toml	data/BirdsongRecognition/Bird4/Wave_prep_210528_224959.csv	results/Bengalese_Finches/hidden_size/hidden_size_16/Bird4/results_210531_143217/train_dur_120s/replicate_9/TweetyNet/checkpoints/max-val-acc-checkpoint.pt	results/Bengalese_Finches/hidden_size/hidden_size_16/Bird4/results_210531_143217/train_dur_120s/replicate_9/StandardizeSpect	0.02	2.3286334590993607	Bird4	3	hidden_size	16	Bengalese Finch	with
355	none	0.9750048088248274	8.631578947368421	0.6643464158954817	13.45399838908166	120	9	TweetyNet	results/Bengalese_Finches/hidden_size/hidden_size_16/Bird4/results_210531_143217	results/Bengalese_Finches/hidden_size/hidden_size_16/Bird4/results_210531_143217/config_BirdsongRecognition_bird04.toml	data/BirdsongRecognition/Bird4/Wave_prep_210528_224959.csv	results/Bengalese_Finches/hidden_size/hidden_size_16/Bird4/results_210531_143217/train_dur_120s/replicate_9/TweetyNet/checkpoints/max-val-acc-checkpoint.pt	results/Bengalese_Finches/hidden_size/hidden_size_16/Bird4/results_210531_143217/train_dur_120s/replicate_9/StandardizeSpect	0.02	2.499519117517257	Bird4	3	hidden_size	16	Bengalese Finch	without
358	min_segment_dur_majority_vote	0.9764537788808156	0.7894736842105263	0.736235312454512	1.40025730335486	120	10	TweetyNet	results/Bengalese_Finches/hidden_size/hidden_size_16/Bird4/results_210531_143217	results/Bengalese_Finches/hidden_size/hidden_size_16/Bird4/results_210531_143217/config_BirdsongRecognition_bird04.toml	data/BirdsongRecognition/Bird4/Wave_prep_210528_224959.csv	results/Bengalese_Finches/hidden_size/hidden_size_16/Bird4/results_210531_143217/train_dur_120s/replicate_10/TweetyNet/checkpoints/max-val-acc-checkpoint.pt	results/Bengalese_Finches/hidden_size/hidden_size_16/Bird4/results_210531_143217/train_dur_120s/replicate_10/StandardizeSpect	0.02	2.3546221119184474	Bird4	3	hidden_size	16	Bengalese Finch	with
359	none	0.9748943494151994	6.7105263157894735	0.6835533714657371	10.78382504165261	120	10	TweetyNet	results/Bengalese_Finches/hidden_size/hidden_size_16/Bird4/results_210531_143217	results/Bengalese_Finches/hidden_size/hidden_size_16/Bird4/results_210531_143217/config_BirdsongRecognition_bird04.toml	data/BirdsongRecognition/Bird4/Wave_prep_210528_224959.csv	results/Bengalese_Finches/hidden_size/hidden_size_16/Bird4/results_210531_143217/train_dur_120s/replicate_10/TweetyNet/checkpoints/max-val-acc-checkpoint.pt	results/Bengalese_Finches/hidden_size/hidden_size_16/Bird4/results_210531_143217/train_dur_120s/replicate_10/StandardizeSpect	0.02	2.510565058480063	Bird4	3	hidden_size	16	Bengalese Finch	without
362	min_segment_dur_majority_vote	0.9809858199524768	0.4473684210526316	0.8251852956398428	0.79510503681241	600	1	TweetyNet	results/Bengalese_Finches/hidden_size/hidden_size_16/Bird4/results_210531_143217	results/Bengalese_Finches/hidden_size/hidden_size_16/Bird4/results_210531_143217/config_BirdsongRecognition_bird04.toml	data/BirdsongRecognition/Bird4/Wave_prep_210528_224959.csv	results/Bengalese_Finches/hidden_size/hidden_size_16/Bird4/results_210531_143217/train_dur_600s/replicate_1/TweetyNet/checkpoints/max-val-acc-checkpoint.pt	results/Bengalese_Finches/hidden_size/hidden_size_16/Bird4/results_210531_143217/train_dur_600s/replicate_1/StandardizeSpect	0.02	1.901418004752331	Bird4	6	hidden_size	16	Bengalese Finch	with
363	none	0.9800462773788045	5.394736842105263	0.7795856723821203	8.976961524810791	600	1	TweetyNet	results/Bengalese_Finches/hidden_size/hidden_size_16/Bird4/results_210531_143217	results/Bengalese_Finches/hidden_size/hidden_size_16/Bird4/results_210531_143217/config_BirdsongRecognition_bird04.toml	data/BirdsongRecognition/Bird4/Wave_prep_210528_224959.csv	results/Bengalese_Finches/hidden_size/hidden_size_16/Bird4/results_210531_143217/train_dur_600s/replicate_1/TweetyNet/checkpoints/max-val-acc-checkpoint.pt	results/Bengalese_Finches/hidden_size/hidden_size_16/Bird4/results_210531_143217/train_dur_600s/replicate_1/StandardizeSpect	0.02	1.9953722621195549	Bird4	6	hidden_size	16	Bengalese Finch	without
366	min_segment_dur_majority_vote	0.9818980992813529	0.3684210526315789	0.8459745805166682	0.64479311789795	600	2	TweetyNet	results/Bengalese_Finches/hidden_size/hidden_size_16/Bird4/results_210531_143217	results/Bengalese_Finches/hidden_size/hidden_size_16/Bird4/results_210531_143217/config_BirdsongRecognition_bird04.toml	data/BirdsongRecognition/Bird4/Wave_prep_210528_224959.csv	results/Bengalese_Finches/hidden_size/hidden_size_16/Bird4/results_210531_143217/train_dur_600s/replicate_2/TweetyNet/checkpoints/max-val-acc-checkpoint.pt	results/Bengalese_Finches/hidden_size/hidden_size_16/Bird4/results_210531_143217/train_dur_600s/replicate_2/StandardizeSpect	0.02	1.8101900718647257	Bird4	6	hidden_size	16	Bengalese Finch	with
367	none	0.9806357090588568	4.605263157894737	0.7804736023368339	7.52938323566321	600	2	TweetyNet	results/Bengalese_Finches/hidden_size/hidden_size_16/Bird4/results_210531_143217	results/Bengalese_Finches/hidden_size/hidden_size_16/Bird4/results_210531_143217/config_BirdsongRecognition_bird04.toml	data/BirdsongRecognition/Bird4/Wave_prep_210528_224959.csv	results/Bengalese_Finches/hidden_size/hidden_size_16/Bird4/results_210531_143217/train_dur_600s/replicate_2/TweetyNet/checkpoints/max-val-acc-checkpoint.pt	results/Bengalese_Finches/hidden_size/hidden_size_16/Bird4/results_210531_143217/train_dur_600s/replicate_2/StandardizeSpect	0.02	1.936429094114312	Bird4	6	hidden_size	16	Bengalese Finch	without
370	min_segment_dur_majority_vote	0.981670167063658	0.3947368421052631	0.8448190698028126	0.7586692453013301	600	3	TweetyNet	results/Bengalese_Finches/hidden_size/hidden_size_16/Bird4/results_210531_143217	results/Bengalese_Finches/hidden_size/hidden_size_16/Bird4/results_210531_143217/config_BirdsongRecognition_bird04.toml	data/BirdsongRecognition/Bird4/Wave_prep_210528_224959.csv	results/Bengalese_Finches/hidden_size/hidden_size_16/Bird4/results_210531_143217/train_dur_600s/replicate_3/TweetyNet/checkpoints/max-val-acc-checkpoint.pt	results/Bengalese_Finches/hidden_size/hidden_size_16/Bird4/results_210531_143217/train_dur_600s/replicate_3/StandardizeSpect	0.02	1.832983293634205	Bird4	6	hidden_size	16	Bengalese Finch	with
371	none	0.980254496853094	5.315789473684211	0.7784500909547533	9.16256038896956	600	3	TweetyNet	results/Bengalese_Finches/hidden_size/hidden_size_16/Bird4/results_210531_143217	results/Bengalese_Finches/hidden_size/hidden_size_16/Bird4/results_210531_143217/config_BirdsongRecognition_bird04.toml	data/BirdsongRecognition/Bird4/Wave_prep_210528_224959.csv	results/Bengalese_Finches/hidden_size/hidden_size_16/Bird4/results_210531_143217/train_dur_600s/replicate_3/TweetyNet/checkpoints/max-val-acc-checkpoint.pt	results/Bengalese_Finches/hidden_size/hidden_size_16/Bird4/results_210531_143217/train_dur_600s/replicate_3/StandardizeSpect	0.02	1.974550314690593	Bird4	6	hidden_size	16	Bengalese Finch	without
374	min_segment_dur_majority_vote	0.9815764240674344	0.4473684210526316	0.8238499174789806	0.79738771976332	600	4	TweetyNet	results/Bengalese_Finches/hidden_size/hidden_size_16/Bird4/results_210531_143217	results/Bengalese_Finches/hidden_size/hidden_size_16/Bird4/results_210531_143217/config_BirdsongRecognition_bird04.toml	data/BirdsongRecognition/Bird4/Wave_prep_210528_224959.csv	results/Bengalese_Finches/hidden_size/hidden_size_16/Bird4/results_210531_143217/train_dur_600s/replicate_4/TweetyNet/checkpoints/max-val-acc-checkpoint.pt	results/Bengalese_Finches/hidden_size/hidden_size_16/Bird4/results_210531_143217/train_dur_600s/replicate_4/StandardizeSpect	0.02	1.8423575932565608	Bird4	6	hidden_size	16	Bengalese Finch	with
375	none	0.9808158840014944	3.973684210526316	0.7820663912670286	6.24499836549152	600	4	TweetyNet	results/Bengalese_Finches/hidden_size/hidden_size_16/Bird4/results_210531_143217	results/Bengalese_Finches/hidden_size/hidden_size_16/Bird4/results_210531_143217/config_BirdsongRecognition_bird04.toml	data/BirdsongRecognition/Bird4/Wave_prep_210528_224959.csv	results/Bengalese_Finches/hidden_size/hidden_size_16/Bird4/results_210531_143217/train_dur_600s/replicate_4/TweetyNet/checkpoints/max-val-acc-checkpoint.pt	results/Bengalese_Finches/hidden_size/hidden_size_16/Bird4/results_210531_143217/train_dur_600s/replicate_4/StandardizeSpect	0.02	1.9184115998505669	Bird4	6	hidden_size	16	Bengalese Finch	without
378	min_segment_dur_majority_vote	0.9806919599788956	0.5789473684210527	0.802613823888644	1.05426739732299	600	5	TweetyNet	results/Bengalese_Finches/hidden_size/hidden_size_16/Bird4/results_210531_143217	results/Bengalese_Finches/hidden_size/hidden_size_16/Bird4/results_210531_143217/config_BirdsongRecognition_bird04.toml	data/BirdsongRecognition/Bird4/Wave_prep_210528_224959.csv	results/Bengalese_Finches/hidden_size/hidden_size_16/Bird4/results_210531_143217/train_dur_600s/replicate_5/TweetyNet/checkpoints/max-val-acc-checkpoint.pt	results/Bengalese_Finches/hidden_size/hidden_size_16/Bird4/results_210531_143217/train_dur_600s/replicate_5/StandardizeSpect	0.02	1.9308040021104311	Bird4	6	hidden_size	16	Bengalese Finch	with
379	none	0.979266142533598	6.157894736842105	0.7367344492670298	9.5810391079009	600	5	TweetyNet	results/Bengalese_Finches/hidden_size/hidden_size_16/Bird4/results_210531_143217	results/Bengalese_Finches/hidden_size/hidden_size_16/Bird4/results_210531_143217/config_BirdsongRecognition_bird04.toml	data/BirdsongRecognition/Bird4/Wave_prep_210528_224959.csv	results/Bengalese_Finches/hidden_size/hidden_size_16/Bird4/results_210531_143217/train_dur_600s/replicate_5/TweetyNet/checkpoints/max-val-acc-checkpoint.pt	results/Bengalese_Finches/hidden_size/hidden_size_16/Bird4/results_210531_143217/train_dur_600s/replicate_5/StandardizeSpect	0.02	2.0733857466402106	Bird4	6	hidden_size	16	Bengalese Finch	without
382	min_segment_dur_majority_vote	0.9810232438897144	0.4736842105263157	0.8224815202664426	0.89815513699632	600	6	TweetyNet	results/Bengalese_Finches/hidden_size/hidden_size_16/Bird4/results_210531_143217	results/Bengalese_Finches/hidden_size/hidden_size_16/Bird4/results_210531_143217/config_BirdsongRecognition_bird04.toml	data/BirdsongRecognition/Bird4/Wave_prep_210528_224959.csv	results/Bengalese_Finches/hidden_size/hidden_size_16/Bird4/results_210531_143217/train_dur_600s/replicate_6/TweetyNet/checkpoints/max-val-acc-checkpoint.pt	results/Bengalese_Finches/hidden_size/hidden_size_16/Bird4/results_210531_143217/train_dur_600s/replicate_6/StandardizeSpect	0.02	1.8976756110285489	Bird4	6	hidden_size	16	Bengalese Finch	with
383	none	0.9796075165886724	5.394736842105263	0.7583218344722298	8.52502305060752	600	6	TweetyNet	results/Bengalese_Finches/hidden_size/hidden_size_16/Bird4/results_210531_143217	results/Bengalese_Finches/hidden_size/hidden_size_16/Bird4/results_210531_143217/config_BirdsongRecognition_bird04.toml	data/BirdsongRecognition/Bird4/Wave_prep_210528_224959.csv	results/Bengalese_Finches/hidden_size/hidden_size_16/Bird4/results_210531_143217/train_dur_600s/replicate_6/TweetyNet/checkpoints/max-val-acc-checkpoint.pt	results/Bengalese_Finches/hidden_size/hidden_size_16/Bird4/results_210531_143217/train_dur_600s/replicate_6/StandardizeSpect	0.02	2.039248341132771	Bird4	6	hidden_size	16	Bengalese Finch	without
386	min_segment_dur_majority_vote	0.9795378710971888	0.5526315789473685	0.7936968721805041	1.11626159859272	600	7	TweetyNet	results/Bengalese_Finches/hidden_size/hidden_size_16/Bird4/results_210531_143217	results/Bengalese_Finches/hidden_size/hidden_size_16/Bird4/results_210531_143217/config_BirdsongRecognition_bird04.toml	data/BirdsongRecognition/Bird4/Wave_prep_210528_224959.csv	results/Bengalese_Finches/hidden_size/hidden_size_16/Bird4/results_210531_143217/train_dur_600s/replicate_7/TweetyNet/checkpoints/max-val-acc-checkpoint.pt	results/Bengalese_Finches/hidden_size/hidden_size_16/Bird4/results_210531_143217/train_dur_600s/replicate_7/StandardizeSpect	0.02	2.0462128902811183	Bird4	6	hidden_size	16	Bengalese Finch	with
387	none	0.9782332095861812	5.657894736842105	0.7361888939978197	8.79970333002975	600	7	TweetyNet	results/Bengalese_Finches/hidden_size/hidden_size_16/Bird4/results_210531_143217	results/Bengalese_Finches/hidden_size/hidden_size_16/Bird4/results_210531_143217/config_BirdsongRecognition_bird04.toml	data/BirdsongRecognition/Bird4/Wave_prep_210528_224959.csv	results/Bengalese_Finches/hidden_size/hidden_size_16/Bird4/results_210531_143217/train_dur_600s/replicate_7/TweetyNet/checkpoints/max-val-acc-checkpoint.pt	results/Bengalese_Finches/hidden_size/hidden_size_16/Bird4/results_210531_143217/train_dur_600s/replicate_7/StandardizeSpect	0.02	2.1766790413818904	Bird4	6	hidden_size	16	Bengalese Finch	without
390	min_segment_dur_majority_vote	0.9821636650104124	0.3421052631578947	0.8648596828898221	0.62615866875979	600	8	TweetyNet	results/Bengalese_Finches/hidden_size/hidden_size_16/Bird4/results_210531_143217	results/Bengalese_Finches/hidden_size/hidden_size_16/Bird4/results_210531_143217/config_BirdsongRecognition_bird04.toml	data/BirdsongRecognition/Bird4/Wave_prep_210528_224959.csv	results/Bengalese_Finches/hidden_size/hidden_size_16/Bird4/results_210531_143217/train_dur_600s/replicate_8/TweetyNet/checkpoints/max-val-acc-checkpoint.pt	results/Bengalese_Finches/hidden_size/hidden_size_16/Bird4/results_210531_143217/train_dur_600s/replicate_8/StandardizeSpect	0.02	1.7836334989587588	Bird4	6	hidden_size	16	Bengalese Finch	with
391	none	0.9807309180886086	4.368421052631579	0.7964418472894268	7.05520173589268	600	8	TweetyNet	results/Bengalese_Finches/hidden_size/hidden_size_16/Bird4/results_210531_143217	results/Bengalese_Finches/hidden_size/hidden_size_16/Bird4/results_210531_143217/config_BirdsongRecognition_bird04.toml	data/BirdsongRecognition/Bird4/Wave_prep_210528_224959.csv	results/Bengalese_Finches/hidden_size/hidden_size_16/Bird4/results_210531_143217/train_dur_600s/replicate_8/TweetyNet/checkpoints/max-val-acc-checkpoint.pt	results/Bengalese_Finches/hidden_size/hidden_size_16/Bird4/results_210531_143217/train_dur_600s/replicate_8/StandardizeSpect	0.02	1.9269081911391428	Bird4	6	hidden_size	16	Bengalese Finch	without
394	min_segment_dur_majority_vote	0.981681130973756	0.4473684210526316	0.8255741007365595	0.72768643953573	600	9	TweetyNet	results/Bengalese_Finches/hidden_size/hidden_size_16/Bird4/results_210531_143217	results/Bengalese_Finches/hidden_size/hidden_size_16/Bird4/results_210531_143217/config_BirdsongRecognition_bird04.toml	data/BirdsongRecognition/Bird4/Wave_prep_210528_224959.csv	results/Bengalese_Finches/hidden_size/hidden_size_16/Bird4/results_210531_143217/train_dur_600s/replicate_9/TweetyNet/checkpoints/max-val-acc-checkpoint.pt	results/Bengalese_Finches/hidden_size/hidden_size_16/Bird4/results_210531_143217/train_dur_600s/replicate_9/StandardizeSpect	0.02	1.8318869026244025	Bird4	6	hidden_size	16	Bengalese Finch	with
395	none	0.9805473712999726	5.921052631578948	0.7728096641128344	9.23086435400093	600	9	TweetyNet	results/Bengalese_Finches/hidden_size/hidden_size_16/Bird4/results_210531_143217	results/Bengalese_Finches/hidden_size/hidden_size_16/Bird4/results_210531_143217/config_BirdsongRecognition_bird04.toml	data/BirdsongRecognition/Bird4/Wave_prep_210528_224959.csv	results/Bengalese_Finches/hidden_size/hidden_size_16/Bird4/results_210531_143217/train_dur_600s/replicate_9/TweetyNet/checkpoints/max-val-acc-checkpoint.pt	results/Bengalese_Finches/hidden_size/hidden_size_16/Bird4/results_210531_143217/train_dur_600s/replicate_9/StandardizeSpect	0.02	1.94526287000274	Bird4	6	hidden_size	16	Bengalese Finch	without
398	min_segment_dur_majority_vote	0.9804353315913044	0.5263157894736842	0.7957438839819867	0.97773635148992	600	10	TweetyNet	results/Bengalese_Finches/hidden_size/hidden_size_16/Bird4/results_210531_143217	results/Bengalese_Finches/hidden_size/hidden_size_16/Bird4/results_210531_143217/config_BirdsongRecognition_bird04.toml	data/BirdsongRecognition/Bird4/Wave_prep_210528_224959.csv	results/Bengalese_Finches/hidden_size/hidden_size_16/Bird4/results_210531_143217/train_dur_600s/replicate_10/TweetyNet/checkpoints/max-val-acc-checkpoint.pt	results/Bengalese_Finches/hidden_size/hidden_size_16/Bird4/results_210531_143217/train_dur_600s/replicate_10/StandardizeSpect	0.02	1.956466840869564	Bird4	6	hidden_size	16	Bengalese Finch	with
399	none	0.979704318846886	5.131578947368421	0.7587059812699185	8.729175910600171	600	10	TweetyNet	results/Bengalese_Finches/hidden_size/hidden_size_16/Bird4/results_210531_143217	results/Bengalese_Finches/hidden_size/hidden_size_16/Bird4/results_210531_143217/config_BirdsongRecognition_bird04.toml	data/BirdsongRecognition/Bird4/Wave_prep_210528_224959.csv	results/Bengalese_Finches/hidden_size/hidden_size_16/Bird4/results_210531_143217/train_dur_600s/replicate_10/TweetyNet/checkpoints/max-val-acc-checkpoint.pt	results/Bengalese_Finches/hidden_size/hidden_size_16/Bird4/results_210531_143217/train_dur_600s/replicate_10/StandardizeSpect	0.02	2.0295681153113865	Bird4	6	hidden_size	16	Bengalese Finch	without
402	min_segment_dur_majority_vote	0.9802633601189806	0.6052631578947368	0.7995433609071536	1.09074635121676	480	1	TweetyNet	results/Bengalese_Finches/hidden_size/hidden_size_16/Bird4/results_210531_143217	results/Bengalese_Finches/hidden_size/hidden_size_16/Bird4/results_210531_143217/config_BirdsongRecognition_bird04.toml	data/BirdsongRecognition/Bird4/Wave_prep_210528_224959.csv	results/Bengalese_Finches/hidden_size/hidden_size_16/Bird4/results_210531_143217/train_dur_480s/replicate_1/TweetyNet/checkpoints/max-val-acc-checkpoint.pt	results/Bengalese_Finches/hidden_size/hidden_size_16/Bird4/results_210531_143217/train_dur_480s/replicate_1/StandardizeSpect	0.02	1.9736639881019369	Bird4	5	hidden_size	16	Bengalese Finch	with
403	none	0.9791656204980966	5.684210526315789	0.7498924718334405	9.46549453168986	480	1	TweetyNet	results/Bengalese_Finches/hidden_size/hidden_size_16/Bird4/results_210531_143217	results/Bengalese_Finches/hidden_size/hidden_size_16/Bird4/results_210531_143217/config_BirdsongRecognition_bird04.toml	data/BirdsongRecognition/Bird4/Wave_prep_210528_224959.csv	results/Bengalese_Finches/hidden_size/hidden_size_16/Bird4/results_210531_143217/train_dur_480s/replicate_1/TweetyNet/checkpoints/max-val-acc-checkpoint.pt	results/Bengalese_Finches/hidden_size/hidden_size_16/Bird4/results_210531_143217/train_dur_480s/replicate_1/StandardizeSpect	0.02	2.0834379501903366	Bird4	5	hidden_size	16	Bengalese Finch	without
406	min_segment_dur_majority_vote	0.9801536126730732	0.5263157894736842	0.8041664666910874	1.08579726276368	480	2	TweetyNet	results/Bengalese_Finches/hidden_size/hidden_size_16/Bird4/results_210531_143217	results/Bengalese_Finches/hidden_size/hidden_size_16/Bird4/results_210531_143217/config_BirdsongRecognition_bird04.toml	data/BirdsongRecognition/Bird4/Wave_prep_210528_224959.csv	results/Bengalese_Finches/hidden_size/hidden_size_16/Bird4/results_210531_143217/train_dur_480s/replicate_2/TweetyNet/checkpoints/max-val-acc-checkpoint.pt	results/Bengalese_Finches/hidden_size/hidden_size_16/Bird4/results_210531_143217/train_dur_480s/replicate_2/StandardizeSpect	0.02	1.9846387326926784	Bird4	5	hidden_size	16	Bengalese Finch	with
407	none	0.9794976739840364	4.7368421052631575	0.7710945145614762	8.55702448978399	480	2	TweetyNet	results/Bengalese_Finches/hidden_size/hidden_size_16/Bird4/results_210531_143217	results/Bengalese_Finches/hidden_size/hidden_size_16/Bird4/results_210531_143217/config_BirdsongRecognition_bird04.toml	data/BirdsongRecognition/Bird4/Wave_prep_210528_224959.csv	results/Bengalese_Finches/hidden_size/hidden_size_16/Bird4/results_210531_143217/train_dur_480s/replicate_2/TweetyNet/checkpoints/max-val-acc-checkpoint.pt	results/Bengalese_Finches/hidden_size/hidden_size_16/Bird4/results_210531_143217/train_dur_480s/replicate_2/StandardizeSpect	0.02	2.050232601596347	Bird4	5	hidden_size	16	Bengalese Finch	without
410	min_segment_dur_majority_vote	0.9802724746372792	0.5526315789473685	0.7969875299092972	1.02412616352124	480	3	TweetyNet	results/Bengalese_Finches/hidden_size/hidden_size_16/Bird4/results_210531_143217	results/Bengalese_Finches/hidden_size/hidden_size_16/Bird4/results_210531_143217/config_BirdsongRecognition_bird04.toml	data/BirdsongRecognition/Bird4/Wave_prep_210528_224959.csv	results/Bengalese_Finches/hidden_size/hidden_size_16/Bird4/results_210531_143217/train_dur_480s/replicate_3/TweetyNet/checkpoints/max-val-acc-checkpoint.pt	results/Bengalese_Finches/hidden_size/hidden_size_16/Bird4/results_210531_143217/train_dur_480s/replicate_3/StandardizeSpect	0.02	1.9727525362720928	Bird4	5	hidden_size	16	Bengalese Finch	with
411	none	0.9791985970455904	5.2368421052631575	0.7500774423901163	8.38926631980383	480	3	TweetyNet	results/Bengalese_Finches/hidden_size/hidden_size_16/Bird4/results_210531_143217	results/Bengalese_Finches/hidden_size/hidden_size_16/Bird4/results_210531_143217/config_BirdsongRecognition_bird04.toml	data/BirdsongRecognition/Bird4/Wave_prep_210528_224959.csv	results/Bengalese_Finches/hidden_size/hidden_size_16/Bird4/results_210531_143217/train_dur_480s/replicate_3/TweetyNet/checkpoints/max-val-acc-checkpoint.pt	results/Bengalese_Finches/hidden_size/hidden_size_16/Bird4/results_210531_143217/train_dur_480s/replicate_3/StandardizeSpect	0.02	2.0801402954409576	Bird4	5	hidden_size	16	Bengalese Finch	without
414	min_segment_dur_majority_vote	0.9815339727758656	0.4210526315789473	0.8478858073256265	0.75839307900801	480	4	TweetyNet	results/Bengalese_Finches/hidden_size/hidden_size_16/Bird4/results_210531_143217	results/Bengalese_Finches/hidden_size/hidden_size_16/Bird4/results_210531_143217/config_BirdsongRecognition_bird04.toml	data/BirdsongRecognition/Bird4/Wave_prep_210528_224959.csv	results/Bengalese_Finches/hidden_size/hidden_size_16/Bird4/results_210531_143217/train_dur_480s/replicate_4/TweetyNet/checkpoints/max-val-acc-checkpoint.pt	results/Bengalese_Finches/hidden_size/hidden_size_16/Bird4/results_210531_143217/train_dur_480s/replicate_4/StandardizeSpect	0.02	1.8466027224134265	Bird4	5	hidden_size	16	Bengalese Finch	with
415	none	0.9797223446914034	6.078947368421052	0.7745627685675934	10.05783011799941	480	4	TweetyNet	results/Bengalese_Finches/hidden_size/hidden_size_16/Bird4/results_210531_143217	results/Bengalese_Finches/hidden_size/hidden_size_16/Bird4/results_210531_143217/config_BirdsongRecognition_bird04.toml	data/BirdsongRecognition/Bird4/Wave_prep_210528_224959.csv	results/Bengalese_Finches/hidden_size/hidden_size_16/Bird4/results_210531_143217/train_dur_480s/replicate_4/TweetyNet/checkpoints/max-val-acc-checkpoint.pt	results/Bengalese_Finches/hidden_size/hidden_size_16/Bird4/results_210531_143217/train_dur_480s/replicate_4/StandardizeSpect	0.02	2.02776553085966	Bird4	5	hidden_size	16	Bengalese Finch	without
418	min_segment_dur_majority_vote	0.9791203829934032	0.6578947368421053	0.7554831156818205	1.20161155738829	480	5	TweetyNet	results/Bengalese_Finches/hidden_size/hidden_size_16/Bird4/results_210531_143217	results/Bengalese_Finches/hidden_size/hidden_size_16/Bird4/results_210531_143217/config_BirdsongRecognition_bird04.toml	data/BirdsongRecognition/Bird4/Wave_prep_210528_224959.csv	results/Bengalese_Finches/hidden_size/hidden_size_16/Bird4/results_210531_143217/train_dur_480s/replicate_5/TweetyNet/checkpoints/max-val-acc-checkpoint.pt	results/Bengalese_Finches/hidden_size/hidden_size_16/Bird4/results_210531_143217/train_dur_480s/replicate_5/StandardizeSpect	0.02	2.0879617006596685	Bird4	5	hidden_size	16	Bengalese Finch	with
419	none	0.9779887090500416	6.7368421052631575	0.7136907213465268	10.85986665614762	480	5	TweetyNet	results/Bengalese_Finches/hidden_size/hidden_size_16/Bird4/results_210531_143217	results/Bengalese_Finches/hidden_size/hidden_size_16/Bird4/results_210531_143217/config_BirdsongRecognition_bird04.toml	data/BirdsongRecognition/Bird4/Wave_prep_210528_224959.csv	results/Bengalese_Finches/hidden_size/hidden_size_16/Bird4/results_210531_143217/train_dur_480s/replicate_5/TweetyNet/checkpoints/max-val-acc-checkpoint.pt	results/Bengalese_Finches/hidden_size/hidden_size_16/Bird4/results_210531_143217/train_dur_480s/replicate_5/StandardizeSpect	0.02	2.201129094995835	Bird4	5	hidden_size	16	Bengalese Finch	without
422	min_segment_dur_majority_vote	0.9801311939730086	0.5789473684210527	0.7907422004362727	1.11658768724622	480	6	TweetyNet	results/Bengalese_Finches/hidden_size/hidden_size_16/Bird4/results_210531_143217	results/Bengalese_Finches/hidden_size/hidden_size_16/Bird4/results_210531_143217/config_BirdsongRecognition_bird04.toml	data/BirdsongRecognition/Bird4/Wave_prep_210528_224959.csv	results/Bengalese_Finches/hidden_size/hidden_size_16/Bird4/results_210531_143217/train_dur_480s/replicate_6/TweetyNet/checkpoints/max-val-acc-checkpoint.pt	results/Bengalese_Finches/hidden_size/hidden_size_16/Bird4/results_210531_143217/train_dur_480s/replicate_6/StandardizeSpect	0.02	1.986880602699137	Bird4	5	hidden_size	16	Bengalese Finch	with
423	none	0.9794206284640692	4.342105263157895	0.7528944757006176	6.795729792619929	480	6	TweetyNet	results/Bengalese_Finches/hidden_size/hidden_size_16/Bird4/results_210531_143217	results/Bengalese_Finches/hidden_size/hidden_size_16/Bird4/results_210531_143217/config_BirdsongRecognition_bird04.toml	data/BirdsongRecognition/Bird4/Wave_prep_210528_224959.csv	results/Bengalese_Finches/hidden_size/hidden_size_16/Bird4/results_210531_143217/train_dur_480s/replicate_6/TweetyNet/checkpoints/max-val-acc-checkpoint.pt	results/Bengalese_Finches/hidden_size/hidden_size_16/Bird4/results_210531_143217/train_dur_480s/replicate_6/StandardizeSpect	0.02	2.0579371535930813	Bird4	5	hidden_size	16	Bengalese Finch	without
426	min_segment_dur_majority_vote	0.980162153035542	0.5	0.8159030817986457	0.99474213411515	480	7	TweetyNet	results/Bengalese_Finches/hidden_size/hidden_size_16/Bird4/results_210531_143217	results/Bengalese_Finches/hidden_size/hidden_size_16/Bird4/results_210531_143217/config_BirdsongRecognition_bird04.toml	data/BirdsongRecognition/Bird4/Wave_prep_210528_224959.csv	results/Bengalese_Finches/hidden_size/hidden_size_16/Bird4/results_210531_143217/train_dur_480s/replicate_7/TweetyNet/checkpoints/max-val-acc-checkpoint.pt	results/Bengalese_Finches/hidden_size/hidden_size_16/Bird4/results_210531_143217/train_dur_480s/replicate_7/StandardizeSpect	0.02	1.983784696445812	Bird4	5	hidden_size	16	Bengalese Finch	with
427	none	0.9785795074872684	6.289473684210527	0.7425484226935432	10.298388838913947	480	7	TweetyNet	results/Bengalese_Finches/hidden_size/hidden_size_16/Bird4/results_210531_143217	results/Bengalese_Finches/hidden_size/hidden_size_16/Bird4/results_210531_143217/config_BirdsongRecognition_bird04.toml	data/BirdsongRecognition/Bird4/Wave_prep_210528_224959.csv	results/Bengalese_Finches/hidden_size/hidden_size_16/Bird4/results_210531_143217/train_dur_480s/replicate_7/TweetyNet/checkpoints/max-val-acc-checkpoint.pt	results/Bengalese_Finches/hidden_size/hidden_size_16/Bird4/results_210531_143217/train_dur_480s/replicate_7/StandardizeSpect	0.02	2.1420492512731704	Bird4	5	hidden_size	16	Bengalese Finch	without
430	min_segment_dur_majority_vote	0.980814922076336	0.4473684210526316	0.8200168724232477	0.80174100176559	480	8	TweetyNet	results/Bengalese_Finches/hidden_size/hidden_size_16/Bird4/results_210531_143217	results/Bengalese_Finches/hidden_size/hidden_size_16/Bird4/results_210531_143217/config_BirdsongRecognition_bird04.toml	data/BirdsongRecognition/Bird4/Wave_prep_210528_224959.csv	results/Bengalese_Finches/hidden_size/hidden_size_16/Bird4/results_210531_143217/train_dur_480s/replicate_8/TweetyNet/checkpoints/max-val-acc-checkpoint.pt	results/Bengalese_Finches/hidden_size/hidden_size_16/Bird4/results_210531_143217/train_dur_480s/replicate_8/StandardizeSpect	0.02	1.9185077923663865	Bird4	5	hidden_size	16	Bengalese Finch	with
431	none	0.9792303299803043	6.184210526315789	0.7532104165833201	9.916238309500333	480	8	TweetyNet	results/Bengalese_Finches/hidden_size/hidden_size_16/Bird4/results_210531_143217	results/Bengalese_Finches/hidden_size/hidden_size_16/Bird4/results_210531_143217/config_BirdsongRecognition_bird04.toml	data/BirdsongRecognition/Bird4/Wave_prep_210528_224959.csv	results/Bengalese_Finches/hidden_size/hidden_size_16/Bird4/results_210531_143217/train_dur_480s/replicate_8/TweetyNet/checkpoints/max-val-acc-checkpoint.pt	results/Bengalese_Finches/hidden_size/hidden_size_16/Bird4/results_210531_143217/train_dur_480s/replicate_8/StandardizeSpect	0.02	2.076967001969565	Bird4	5	hidden_size	16	Bengalese Finch	without
434	min_segment_dur_majority_vote	0.9787496808522126	0.5789473684210527	0.794239316214169	1.13345691922678	480	9	TweetyNet	results/Bengalese_Finches/hidden_size/hidden_size_16/Bird4/results_210531_143217	results/Bengalese_Finches/hidden_size/hidden_size_16/Bird4/results_210531_143217/config_BirdsongRecognition_bird04.toml	data/BirdsongRecognition/Bird4/Wave_prep_210528_224959.csv	results/Bengalese_Finches/hidden_size/hidden_size_16/Bird4/results_210531_143217/train_dur_480s/replicate_9/TweetyNet/checkpoints/max-val-acc-checkpoint.pt	results/Bengalese_Finches/hidden_size/hidden_size_16/Bird4/results_210531_143217/train_dur_480s/replicate_9/StandardizeSpect	0.02	2.125031914778741	Bird4	5	hidden_size	16	Bengalese Finch	with
435	none	0.9776129620686982	5.921052631578948	0.7469166520171109	9.51684097523115	480	9	TweetyNet	results/Bengalese_Finches/hidden_size/hidden_size_16/Bird4/results_210531_143217	results/Bengalese_Finches/hidden_size/hidden_size_16/Bird4/results_210531_143217/config_BirdsongRecognition_bird04.toml	data/BirdsongRecognition/Bird4/Wave_prep_210528_224959.csv	results/Bengalese_Finches/hidden_size/hidden_size_16/Bird4/results_210531_143217/train_dur_480s/replicate_9/TweetyNet/checkpoints/max-val-acc-checkpoint.pt	results/Bengalese_Finches/hidden_size/hidden_size_16/Bird4/results_210531_143217/train_dur_480s/replicate_9/StandardizeSpect	0.02	2.238703793130181	Bird4	5	hidden_size	16	Bengalese Finch	without
438	min_segment_dur_majority_vote	0.9812273518104702	0.5263157894736842	0.8249377191274966	0.94144531616272	480	10	TweetyNet	results/Bengalese_Finches/hidden_size/hidden_size_16/Bird4/results_210531_143217	results/Bengalese_Finches/hidden_size/hidden_size_16/Bird4/results_210531_143217/config_BirdsongRecognition_bird04.toml	data/BirdsongRecognition/Bird4/Wave_prep_210528_224959.csv	results/Bengalese_Finches/hidden_size/hidden_size_16/Bird4/results_210531_143217/train_dur_480s/replicate_10/TweetyNet/checkpoints/max-val-acc-checkpoint.pt	results/Bengalese_Finches/hidden_size/hidden_size_16/Bird4/results_210531_143217/train_dur_480s/replicate_10/StandardizeSpect	0.02	1.877264818952984	Bird4	5	hidden_size	16	Bengalese Finch	with
439	none	0.9799080815176862	6.526315789473684	0.7665120950399354	10.57786348276889	480	10	TweetyNet	results/Bengalese_Finches/hidden_size/hidden_size_16/Bird4/results_210531_143217	results/Bengalese_Finches/hidden_size/hidden_size_16/Bird4/results_210531_143217/config_BirdsongRecognition_bird04.toml	data/BirdsongRecognition/Bird4/Wave_prep_210528_224959.csv	results/Bengalese_Finches/hidden_size/hidden_size_16/Bird4/results_210531_143217/train_dur_480s/replicate_10/TweetyNet/checkpoints/max-val-acc-checkpoint.pt	results/Bengalese_Finches/hidden_size/hidden_size_16/Bird4/results_210531_143217/train_dur_480s/replicate_10/StandardizeSpect	0.02	2.009191848231384	Bird4	5	hidden_size	16	Bengalese Finch	without
442	min_segment_dur_majority_vote	0.9734037899705512	1.0526315789473684	0.6884944072266704	1.69189209851525	30	1	TweetyNet	results/Bengalese_Finches/hidden_size/hidden_size_16/Bird4/results_210531_143217	results/Bengalese_Finches/hidden_size/hidden_size_16/Bird4/results_210531_143217/config_BirdsongRecognition_bird04.toml	data/BirdsongRecognition/Bird4/Wave_prep_210528_224959.csv	results/Bengalese_Finches/hidden_size/hidden_size_16/Bird4/results_210531_143217/train_dur_30s/replicate_1/TweetyNet/checkpoints/max-val-acc-checkpoint.pt	results/Bengalese_Finches/hidden_size/hidden_size_16/Bird4/results_210531_143217/train_dur_30s/replicate_1/StandardizeSpect	0.02	2.6596210029448897	Bird4	0	hidden_size	16	Bengalese Finch	with
443	none	0.9699805159624848	13.736842105263158	0.6076661888969462	20.83717176261873	30	1	TweetyNet	results/Bengalese_Finches/hidden_size/hidden_size_16/Bird4/results_210531_143217	results/Bengalese_Finches/hidden_size/hidden_size_16/Bird4/results_210531_143217/config_BirdsongRecognition_bird04.toml	data/BirdsongRecognition/Bird4/Wave_prep_210528_224959.csv	results/Bengalese_Finches/hidden_size/hidden_size_16/Bird4/results_210531_143217/train_dur_30s/replicate_1/TweetyNet/checkpoints/max-val-acc-checkpoint.pt	results/Bengalese_Finches/hidden_size/hidden_size_16/Bird4/results_210531_143217/train_dur_30s/replicate_1/StandardizeSpect	0.02	3.0019484037515087	Bird4	0	hidden_size	16	Bengalese Finch	without
446	min_segment_dur_majority_vote	0.9704521500713932	1.4473684210526316	0.6509610820924832	2.64244441490102	30	2	TweetyNet	results/Bengalese_Finches/hidden_size/hidden_size_16/Bird4/results_210531_143217	results/Bengalese_Finches/hidden_size/hidden_size_16/Bird4/results_210531_143217/config_BirdsongRecognition_bird04.toml	data/BirdsongRecognition/Bird4/Wave_prep_210528_224959.csv	results/Bengalese_Finches/hidden_size/hidden_size_16/Bird4/results_210531_143217/train_dur_30s/replicate_2/TweetyNet/checkpoints/max-val-acc-checkpoint.pt	results/Bengalese_Finches/hidden_size/hidden_size_16/Bird4/results_210531_143217/train_dur_30s/replicate_2/StandardizeSpect	0.02	2.95478499286067	Bird4	0	hidden_size	16	Bengalese Finch	with
447	none	0.9660449042890612	17.289473684210527	0.5476092320719816	27.041521671428548	30	2	TweetyNet	results/Bengalese_Finches/hidden_size/hidden_size_16/Bird4/results_210531_143217	results/Bengalese_Finches/hidden_size/hidden_size_16/Bird4/results_210531_143217/config_BirdsongRecognition_bird04.toml	data/BirdsongRecognition/Bird4/Wave_prep_210528_224959.csv	results/Bengalese_Finches/hidden_size/hidden_size_16/Bird4/results_210531_143217/train_dur_30s/replicate_2/TweetyNet/checkpoints/max-val-acc-checkpoint.pt	results/Bengalese_Finches/hidden_size/hidden_size_16/Bird4/results_210531_143217/train_dur_30s/replicate_2/StandardizeSpect	0.02	3.39550957109388	Bird4	0	hidden_size	16	Bengalese Finch	without
450	min_segment_dur_majority_vote	0.9699618742077822	1.4473684210526316	0.6346774556212478	2.61390474760788	30	3	TweetyNet	results/Bengalese_Finches/hidden_size/hidden_size_16/Bird4/results_210531_143217	results/Bengalese_Finches/hidden_size/hidden_size_16/Bird4/results_210531_143217/config_BirdsongRecognition_bird04.toml	data/BirdsongRecognition/Bird4/Wave_prep_210528_224959.csv	results/Bengalese_Finches/hidden_size/hidden_size_16/Bird4/results_210531_143217/train_dur_30s/replicate_3/TweetyNet/checkpoints/max-val-acc-checkpoint.pt	results/Bengalese_Finches/hidden_size/hidden_size_16/Bird4/results_210531_143217/train_dur_30s/replicate_3/StandardizeSpect	0.02	3.003812579221776	Bird4	0	hidden_size	16	Bengalese Finch	with
451	none	0.9658583957513304	15.657894736842104	0.5494977814879571	24.25268238907212	30	3	TweetyNet	results/Bengalese_Finches/hidden_size/hidden_size_16/Bird4/results_210531_143217	results/Bengalese_Finches/hidden_size/hidden_size_16/Bird4/results_210531_143217/config_BirdsongRecognition_bird04.toml	data/BirdsongRecognition/Bird4/Wave_prep_210528_224959.csv	results/Bengalese_Finches/hidden_size/hidden_size_16/Bird4/results_210531_143217/train_dur_30s/replicate_3/TweetyNet/checkpoints/max-val-acc-checkpoint.pt	results/Bengalese_Finches/hidden_size/hidden_size_16/Bird4/results_210531_143217/train_dur_30s/replicate_3/StandardizeSpect	0.02	3.414160424866952	Bird4	0	hidden_size	16	Bengalese Finch	without
454	min_segment_dur_majority_vote	0.9727719243356132	1.368421052631579	0.6620984395975665	2.41194191552714	30	4	TweetyNet	results/Bengalese_Finches/hidden_size/hidden_size_16/Bird4/results_210531_143217	results/Bengalese_Finches/hidden_size/hidden_size_16/Bird4/results_210531_143217/config_BirdsongRecognition_bird04.toml	data/BirdsongRecognition/Bird4/Wave_prep_210528_224959.csv	results/Bengalese_Finches/hidden_size/hidden_size_16/Bird4/results_210531_143217/train_dur_30s/replicate_4/TweetyNet/checkpoints/max-val-acc-checkpoint.pt	results/Bengalese_Finches/hidden_size/hidden_size_16/Bird4/results_210531_143217/train_dur_30s/replicate_4/StandardizeSpect	0.02	2.7228075664386675	Bird4	0	hidden_size	16	Bengalese Finch	with
455	none	0.967958658754718	15.552631578947368	0.5489681475553191	24.76064915864458	30	4	TweetyNet	results/Bengalese_Finches/hidden_size/hidden_size_16/Bird4/results_210531_143217	results/Bengalese_Finches/hidden_size/hidden_size_16/Bird4/results_210531_143217/config_BirdsongRecognition_bird04.toml	data/BirdsongRecognition/Bird4/Wave_prep_210528_224959.csv	results/Bengalese_Finches/hidden_size/hidden_size_16/Bird4/results_210531_143217/train_dur_30s/replicate_4/TweetyNet/checkpoints/max-val-acc-checkpoint.pt	results/Bengalese_Finches/hidden_size/hidden_size_16/Bird4/results_210531_143217/train_dur_30s/replicate_4/StandardizeSpect	0.02	3.2041341245281907	Bird4	0	hidden_size	16	Bengalese Finch	without
458	min_segment_dur_majority_vote	0.974742695819032	1.131578947368421	0.7194148167688148	2.0255532445157503	30	5	TweetyNet	results/Bengalese_Finches/hidden_size/hidden_size_16/Bird4/results_210531_143217	results/Bengalese_Finches/hidden_size/hidden_size_16/Bird4/results_210531_143217/config_BirdsongRecognition_bird04.toml	data/BirdsongRecognition/Bird4/Wave_prep_210528_224959.csv	results/Bengalese_Finches/hidden_size/hidden_size_16/Bird4/results_210531_143217/train_dur_30s/replicate_5/TweetyNet/checkpoints/max-val-acc-checkpoint.pt	results/Bengalese_Finches/hidden_size/hidden_size_16/Bird4/results_210531_143217/train_dur_30s/replicate_5/StandardizeSpect	0.02	2.5257304180967943	Bird4	0	hidden_size	16	Bengalese Finch	with
459	none	0.9706842592748512	14.526315789473683	0.5985896382295376	23.04244752023461	30	5	TweetyNet	results/Bengalese_Finches/hidden_size/hidden_size_16/Bird4/results_210531_143217	results/Bengalese_Finches/hidden_size/hidden_size_16/Bird4/results_210531_143217/config_BirdsongRecognition_bird04.toml	data/BirdsongRecognition/Bird4/Wave_prep_210528_224959.csv	results/Bengalese_Finches/hidden_size/hidden_size_16/Bird4/results_210531_143217/train_dur_30s/replicate_5/TweetyNet/checkpoints/max-val-acc-checkpoint.pt	results/Bengalese_Finches/hidden_size/hidden_size_16/Bird4/results_210531_143217/train_dur_30s/replicate_5/StandardizeSpect	0.02	2.9315740725148864	Bird4	0	hidden_size	16	Bengalese Finch	without
462	min_segment_dur_majority_vote	0.9670185847214936	2.0526315789473686	0.6144959892182457	3.91993326634528	30	6	TweetyNet	results/Bengalese_Finches/hidden_size/hidden_size_16/Bird4/results_210531_143217	results/Bengalese_Finches/hidden_size/hidden_size_16/Bird4/results_210531_143217/config_BirdsongRecognition_bird04.toml	data/BirdsongRecognition/Bird4/Wave_prep_210528_224959.csv	results/Bengalese_Finches/hidden_size/hidden_size_16/Bird4/results_210531_143217/train_dur_30s/replicate_6/TweetyNet/checkpoints/max-val-acc-checkpoint.pt	results/Bengalese_Finches/hidden_size/hidden_size_16/Bird4/results_210531_143217/train_dur_30s/replicate_6/StandardizeSpect	0.02	3.29814152785064	Bird4	0	hidden_size	16	Bengalese Finch	with
463	none	0.96315296329874	12.026315789473683	0.5392593833217851	19.58516832759264	30	6	TweetyNet	results/Bengalese_Finches/hidden_size/hidden_size_16/Bird4/results_210531_143217	results/Bengalese_Finches/hidden_size/hidden_size_16/Bird4/results_210531_143217/config_BirdsongRecognition_bird04.toml	data/BirdsongRecognition/Bird4/Wave_prep_210528_224959.csv	results/Bengalese_Finches/hidden_size/hidden_size_16/Bird4/results_210531_143217/train_dur_30s/replicate_6/TweetyNet/checkpoints/max-val-acc-checkpoint.pt	results/Bengalese_Finches/hidden_size/hidden_size_16/Bird4/results_210531_143217/train_dur_30s/replicate_6/StandardizeSpect	0.02	3.684703670126	Bird4	0	hidden_size	16	Bengalese Finch	without
466	min_segment_dur_majority_vote	0.9718735056867588	1.1578947368421053	0.660639838067221	1.95326255355458	30	7	TweetyNet	results/Bengalese_Finches/hidden_size/hidden_size_16/Bird4/results_210531_143217	results/Bengalese_Finches/hidden_size/hidden_size_16/Bird4/results_210531_143217/config_BirdsongRecognition_bird04.toml	data/BirdsongRecognition/Bird4/Wave_prep_210528_224959.csv	results/Bengalese_Finches/hidden_size/hidden_size_16/Bird4/results_210531_143217/train_dur_30s/replicate_7/TweetyNet/checkpoints/max-val-acc-checkpoint.pt	results/Bengalese_Finches/hidden_size/hidden_size_16/Bird4/results_210531_143217/train_dur_30s/replicate_7/StandardizeSpect	0.02	2.8126494313241324	Bird4	0	hidden_size	16	Bengalese Finch	with
467	none	0.9669649483252276	16.07894736842105	0.5506098528107964	24.60942474560856	30	7	TweetyNet	results/Bengalese_Finches/hidden_size/hidden_size_16/Bird4/results_210531_143217	results/Bengalese_Finches/hidden_size/hidden_size_16/Bird4/results_210531_143217/config_BirdsongRecognition_bird04.toml	data/BirdsongRecognition/Bird4/Wave_prep_210528_224959.csv	results/Bengalese_Finches/hidden_size/hidden_size_16/Bird4/results_210531_143217/train_dur_30s/replicate_7/TweetyNet/checkpoints/max-val-acc-checkpoint.pt	results/Bengalese_Finches/hidden_size/hidden_size_16/Bird4/results_210531_143217/train_dur_30s/replicate_7/StandardizeSpect	0.02	3.303505167477228	Bird4	0	hidden_size	16	Bengalese Finch	without
470	min_segment_dur_majority_vote	0.9717131248004192	1.3421052631578947	0.6453209417831447	2.15108207241367	30	8	TweetyNet	results/Bengalese_Finches/hidden_size/hidden_size_16/Bird4/results_210531_143217	results/Bengalese_Finches/hidden_size/hidden_size_16/Bird4/results_210531_143217/config_BirdsongRecognition_bird04.toml	data/BirdsongRecognition/Bird4/Wave_prep_210528_224959.csv	results/Bengalese_Finches/hidden_size/hidden_size_16/Bird4/results_210531_143217/train_dur_30s/replicate_8/TweetyNet/checkpoints/max-val-acc-checkpoint.pt	results/Bengalese_Finches/hidden_size/hidden_size_16/Bird4/results_210531_143217/train_dur_30s/replicate_8/StandardizeSpect	0.02	2.828687519958073	Bird4	0	hidden_size	16	Bengalese Finch	with
471	none	0.9671119808293852	16.394736842105264	0.5485416684820466	24.7577922859252	30	8	TweetyNet	results/Bengalese_Finches/hidden_size/hidden_size_16/Bird4/results_210531_143217	results/Bengalese_Finches/hidden_size/hidden_size_16/Bird4/results_210531_143217/config_BirdsongRecognition_bird04.toml	data/BirdsongRecognition/Bird4/Wave_prep_210528_224959.csv	results/Bengalese_Finches/hidden_size/hidden_size_16/Bird4/results_210531_143217/train_dur_30s/replicate_8/TweetyNet/checkpoints/max-val-acc-checkpoint.pt	results/Bengalese_Finches/hidden_size/hidden_size_16/Bird4/results_210531_143217/train_dur_30s/replicate_8/StandardizeSpect	0.02	3.288801917061479	Bird4	0	hidden_size	16	Bengalese Finch	without
474	min_segment_dur_majority_vote	0.9712437531439516	1.5263157894736843	0.6446031703839712	2.83610690826493	30	9	TweetyNet	results/Bengalese_Finches/hidden_size/hidden_size_16/Bird4/results_210531_143217	results/Bengalese_Finches/hidden_size/hidden_size_16/Bird4/results_210531_143217/config_BirdsongRecognition_bird04.toml	data/BirdsongRecognition/Bird4/Wave_prep_210528_224959.csv	results/Bengalese_Finches/hidden_size/hidden_size_16/Bird4/results_210531_143217/train_dur_30s/replicate_9/TweetyNet/checkpoints/max-val-acc-checkpoint.pt	results/Bengalese_Finches/hidden_size/hidden_size_16/Bird4/results_210531_143217/train_dur_30s/replicate_9/StandardizeSpect	0.02	2.875624685604828	Bird4	0	hidden_size	16	Bengalese Finch	with
475	none	0.9677462498025776	13.447368421052632	0.5642633421305433	21.758523626874855	30	9	TweetyNet	results/Bengalese_Finches/hidden_size/hidden_size_16/Bird4/results_210531_143217	results/Bengalese_Finches/hidden_size/hidden_size_16/Bird4/results_210531_143217/config_BirdsongRecognition_bird04.toml	data/BirdsongRecognition/Bird4/Wave_prep_210528_224959.csv	results/Bengalese_Finches/hidden_size/hidden_size_16/Bird4/results_210531_143217/train_dur_30s/replicate_9/TweetyNet/checkpoints/max-val-acc-checkpoint.pt	results/Bengalese_Finches/hidden_size/hidden_size_16/Bird4/results_210531_143217/train_dur_30s/replicate_9/StandardizeSpect	0.02	3.225375019742227	Bird4	0	hidden_size	16	Bengalese Finch	without
478	min_segment_dur_majority_vote	0.9733348140835584	1.1578947368421053	0.6984588389699893	1.89857294894021	30	10	TweetyNet	results/Bengalese_Finches/hidden_size/hidden_size_16/Bird4/results_210531_143217	results/Bengalese_Finches/hidden_size/hidden_size_16/Bird4/results_210531_143217/config_BirdsongRecognition_bird04.toml	data/BirdsongRecognition/Bird4/Wave_prep_210528_224959.csv	results/Bengalese_Finches/hidden_size/hidden_size_16/Bird4/results_210531_143217/train_dur_30s/replicate_10/TweetyNet/checkpoints/max-val-acc-checkpoint.pt	results/Bengalese_Finches/hidden_size/hidden_size_16/Bird4/results_210531_143217/train_dur_30s/replicate_10/StandardizeSpect	0.02	2.6665185916441514	Bird4	0	hidden_size	16	Bengalese Finch	with
479	none	0.96947239460224	13.18421052631579	0.5973486749853144	20.54058741501727	30	10	TweetyNet	results/Bengalese_Finches/hidden_size/hidden_size_16/Bird4/results_210531_143217	results/Bengalese_Finches/hidden_size/hidden_size_16/Bird4/results_210531_143217/config_BirdsongRecognition_bird04.toml	data/BirdsongRecognition/Bird4/Wave_prep_210528_224959.csv	results/Bengalese_Finches/hidden_size/hidden_size_16/Bird4/results_210531_143217/train_dur_30s/replicate_10/TweetyNet/checkpoints/max-val-acc-checkpoint.pt	results/Bengalese_Finches/hidden_size/hidden_size_16/Bird4/results_210531_143217/train_dur_30s/replicate_10/StandardizeSpect	0.02	3.052760539776012	Bird4	0	hidden_size	16	Bengalese Finch	without
482	min_segment_dur_majority_vote	0.979025679418312	0.6052631578947368	0.7947328795599796	1.06470321334679	180	1	TweetyNet	results/Bengalese_Finches/hidden_size/hidden_size_16/Bird4/results_210531_143217	results/Bengalese_Finches/hidden_size/hidden_size_16/Bird4/results_210531_143217/config_BirdsongRecognition_bird04.toml	data/BirdsongRecognition/Bird4/Wave_prep_210528_224959.csv	results/Bengalese_Finches/hidden_size/hidden_size_16/Bird4/results_210531_143217/train_dur_180s/replicate_1/TweetyNet/checkpoints/max-val-acc-checkpoint.pt	results/Bengalese_Finches/hidden_size/hidden_size_16/Bird4/results_210531_143217/train_dur_180s/replicate_1/StandardizeSpect	0.02	2.097432058168802	Bird4	4	hidden_size	16	Bengalese Finch	with
483	none	0.9765888150480294	8.421052631578947	0.6975351611780628	13.40949844383208	180	1	TweetyNet	results/Bengalese_Finches/hidden_size/hidden_size_16/Bird4/results_210531_143217	results/Bengalese_Finches/hidden_size/hidden_size_16/Bird4/results_210531_143217/config_BirdsongRecognition_bird04.toml	data/BirdsongRecognition/Bird4/Wave_prep_210528_224959.csv	results/Bengalese_Finches/hidden_size/hidden_size_16/Bird4/results_210531_143217/train_dur_180s/replicate_1/TweetyNet/checkpoints/max-val-acc-checkpoint.pt	results/Bengalese_Finches/hidden_size/hidden_size_16/Bird4/results_210531_143217/train_dur_180s/replicate_1/StandardizeSpect	0.02	2.3411184951970587	Bird4	4	hidden_size	16	Bengalese Finch	without
486	min_segment_dur_majority_vote	0.9806228194641587	0.5	0.8295062853442235	0.8575332906771699	180	2	TweetyNet	results/Bengalese_Finches/hidden_size/hidden_size_16/Bird4/results_210531_143217	results/Bengalese_Finches/hidden_size/hidden_size_16/Bird4/results_210531_143217/config_BirdsongRecognition_bird04.toml	data/BirdsongRecognition/Bird4/Wave_prep_210528_224959.csv	results/Bengalese_Finches/hidden_size/hidden_size_16/Bird4/results_210531_143217/train_dur_180s/replicate_2/TweetyNet/checkpoints/max-val-acc-checkpoint.pt	results/Bengalese_Finches/hidden_size/hidden_size_16/Bird4/results_210531_143217/train_dur_180s/replicate_2/StandardizeSpect	0.02	1.9377180535841247	Bird4	4	hidden_size	16	Bengalese Finch	with
487	none	0.9786525147156804	6.842105263157895	0.7468077351281576	11.10313064575495	180	2	TweetyNet	results/Bengalese_Finches/hidden_size/hidden_size_16/Bird4/results_210531_143217	results/Bengalese_Finches/hidden_size/hidden_size_16/Bird4/results_210531_143217/config_BirdsongRecognition_bird04.toml	data/BirdsongRecognition/Bird4/Wave_prep_210528_224959.csv	results/Bengalese_Finches/hidden_size/hidden_size_16/Bird4/results_210531_143217/train_dur_180s/replicate_2/TweetyNet/checkpoints/max-val-acc-checkpoint.pt	results/Bengalese_Finches/hidden_size/hidden_size_16/Bird4/results_210531_143217/train_dur_180s/replicate_2/StandardizeSpect	0.02	2.134748528431951	Bird4	4	hidden_size	16	Bengalese Finch	without
490	min_segment_dur_majority_vote	0.9763931539828886	1.0	0.7261196382701255	1.7505719804594402	180	3	TweetyNet	results/Bengalese_Finches/hidden_size/hidden_size_16/Bird4/results_210531_143217	results/Bengalese_Finches/hidden_size/hidden_size_16/Bird4/results_210531_143217/config_BirdsongRecognition_bird04.toml	data/BirdsongRecognition/Bird4/Wave_prep_210528_224959.csv	results/Bengalese_Finches/hidden_size/hidden_size_16/Bird4/results_210531_143217/train_dur_180s/replicate_3/TweetyNet/checkpoints/max-val-acc-checkpoint.pt	results/Bengalese_Finches/hidden_size/hidden_size_16/Bird4/results_210531_143217/train_dur_180s/replicate_3/StandardizeSpect	0.02	2.3606846017111383	Bird4	4	hidden_size	16	Bengalese Finch	with
491	none	0.974772731159706	8.394736842105264	0.6670182000715045	13.68934760650464	180	3	TweetyNet	results/Bengalese_Finches/hidden_size/hidden_size_16/Bird4/results_210531_143217	results/Bengalese_Finches/hidden_size/hidden_size_16/Bird4/results_210531_143217/config_BirdsongRecognition_bird04.toml	data/BirdsongRecognition/Bird4/Wave_prep_210528_224959.csv	results/Bengalese_Finches/hidden_size/hidden_size_16/Bird4/results_210531_143217/train_dur_180s/replicate_3/TweetyNet/checkpoints/max-val-acc-checkpoint.pt	results/Bengalese_Finches/hidden_size/hidden_size_16/Bird4/results_210531_143217/train_dur_180s/replicate_3/StandardizeSpect	0.02	2.5227268840294137	Bird4	4	hidden_size	16	Bengalese Finch	without
494	min_segment_dur_majority_vote	0.9780903346305552	0.6842105263157895	0.7699753365094443	1.36115343444601	180	4	TweetyNet	results/Bengalese_Finches/hidden_size/hidden_size_16/Bird4/results_210531_143217	results/Bengalese_Finches/hidden_size/hidden_size_16/Bird4/results_210531_143217/config_BirdsongRecognition_bird04.toml	data/BirdsongRecognition/Bird4/Wave_prep_210528_224959.csv	results/Bengalese_Finches/hidden_size/hidden_size_16/Bird4/results_210531_143217/train_dur_180s/replicate_4/TweetyNet/checkpoints/max-val-acc-checkpoint.pt	results/Bengalese_Finches/hidden_size/hidden_size_16/Bird4/results_210531_143217/train_dur_180s/replicate_4/StandardizeSpect	0.02	2.190966536944494	Bird4	4	hidden_size	16	Bengalese Finch	with
495	none	0.976320005330564	8.31578947368421	0.6917411815322542	13.22138137633363	180	4	TweetyNet	results/Bengalese_Finches/hidden_size/hidden_size_16/Bird4/results_210531_143217	results/Bengalese_Finches/hidden_size/hidden_size_16/Bird4/results_210531_143217/config_BirdsongRecognition_bird04.toml	data/BirdsongRecognition/Bird4/Wave_prep_210528_224959.csv	results/Bengalese_Finches/hidden_size/hidden_size_16/Bird4/results_210531_143217/train_dur_180s/replicate_4/TweetyNet/checkpoints/max-val-acc-checkpoint.pt	results/Bengalese_Finches/hidden_size/hidden_size_16/Bird4/results_210531_143217/train_dur_180s/replicate_4/StandardizeSpect	0.02	2.3679994669435933	Bird4	4	hidden_size	16	Bengalese Finch	without
498	min_segment_dur_majority_vote	0.9787383702835694	0.5789473684210527	0.7818451994539003	1.05876210489771	180	5	TweetyNet	results/Bengalese_Finches/hidden_size/hidden_size_16/Bird4/results_210531_143217	results/Bengalese_Finches/hidden_size/hidden_size_16/Bird4/results_210531_143217/config_BirdsongRecognition_bird04.toml	data/BirdsongRecognition/Bird4/Wave_prep_210528_224959.csv	results/Bengalese_Finches/hidden_size/hidden_size_16/Bird4/results_210531_143217/train_dur_180s/replicate_5/TweetyNet/checkpoints/max-val-acc-checkpoint.pt	results/Bengalese_Finches/hidden_size/hidden_size_16/Bird4/results_210531_143217/train_dur_180s/replicate_5/StandardizeSpect	0.02	2.126162971643064	Bird4	4	hidden_size	16	Bengalese Finch	with
499	none	0.97626942642508	8.631578947368421	0.6885288828011739	13.42104446656132	180	5	TweetyNet	results/Bengalese_Finches/hidden_size/hidden_size_16/Bird4/results_210531_143217	results/Bengalese_Finches/hidden_size/hidden_size_16/Bird4/results_210531_143217/config_BirdsongRecognition_bird04.toml	data/BirdsongRecognition/Bird4/Wave_prep_210528_224959.csv	results/Bengalese_Finches/hidden_size/hidden_size_16/Bird4/results_210531_143217/train_dur_180s/replicate_5/TweetyNet/checkpoints/max-val-acc-checkpoint.pt	results/Bengalese_Finches/hidden_size/hidden_size_16/Bird4/results_210531_143217/train_dur_180s/replicate_5/StandardizeSpect	0.02	2.373057357491992	Bird4	4	hidden_size	16	Bengalese Finch	without
502	min_segment_dur_majority_vote	0.9786556762222476	0.6052631578947368	0.7895437630394614	1.02066189764865	180	6	TweetyNet	results/Bengalese_Finches/hidden_size/hidden_size_16/Bird4/results_210531_143217	results/Bengalese_Finches/hidden_size/hidden_size_16/Bird4/results_210531_143217/config_BirdsongRecognition_bird04.toml	data/BirdsongRecognition/Bird4/Wave_prep_210528_224959.csv	results/Bengalese_Finches/hidden_size/hidden_size_16/Bird4/results_210531_143217/train_dur_180s/replicate_6/TweetyNet/checkpoints/max-val-acc-checkpoint.pt	results/Bengalese_Finches/hidden_size/hidden_size_16/Bird4/results_210531_143217/train_dur_180s/replicate_6/StandardizeSpect	0.02	2.1344323777752527	Bird4	4	hidden_size	16	Bengalese Finch	with
503	none	0.9769177224235532	7.105263157894737	0.7187519490185973	11.80984558845058	180	6	TweetyNet	results/Bengalese_Finches/hidden_size/hidden_size_16/Bird4/results_210531_143217	results/Bengalese_Finches/hidden_size/hidden_size_16/Bird4/results_210531_143217/config_BirdsongRecognition_bird04.toml	data/BirdsongRecognition/Bird4/Wave_prep_210528_224959.csv	results/Bengalese_Finches/hidden_size/hidden_size_16/Bird4/results_210531_143217/train_dur_180s/replicate_6/TweetyNet/checkpoints/max-val-acc-checkpoint.pt	results/Bengalese_Finches/hidden_size/hidden_size_16/Bird4/results_210531_143217/train_dur_180s/replicate_6/StandardizeSpect	0.02	2.3082277576446764	Bird4	4	hidden_size	16	Bengalese Finch	without
506	min_segment_dur_majority_vote	0.978067736185958	0.7368421052631579	0.7589183441940963	1.37786560102912	180	7	TweetyNet	results/Bengalese_Finches/hidden_size/hidden_size_16/Bird4/results_210531_143217	results/Bengalese_Finches/hidden_size/hidden_size_16/Bird4/results_210531_143217/config_BirdsongRecognition_bird04.toml	data/BirdsongRecognition/Bird4/Wave_prep_210528_224959.csv	results/Bengalese_Finches/hidden_size/hidden_size_16/Bird4/results_210531_143217/train_dur_180s/replicate_7/TweetyNet/checkpoints/max-val-acc-checkpoint.pt	results/Bengalese_Finches/hidden_size/hidden_size_16/Bird4/results_210531_143217/train_dur_180s/replicate_7/StandardizeSpect	0.02	2.1932263814041897	Bird4	4	hidden_size	16	Bengalese Finch	with
507	none	0.9767865136527988	7.263157894736842	0.7013700738146227	11.15742652989347	180	7	TweetyNet	results/Bengalese_Finches/hidden_size/hidden_size_16/Bird4/results_210531_143217	results/Bengalese_Finches/hidden_size/hidden_size_16/Bird4/results_210531_143217/config_BirdsongRecognition_bird04.toml	data/BirdsongRecognition/Bird4/Wave_prep_210528_224959.csv	results/Bengalese_Finches/hidden_size/hidden_size_16/Bird4/results_210531_143217/train_dur_180s/replicate_7/TweetyNet/checkpoints/max-val-acc-checkpoint.pt	results/Bengalese_Finches/hidden_size/hidden_size_16/Bird4/results_210531_143217/train_dur_180s/replicate_7/StandardizeSpect	0.02	2.321348634720133	Bird4	4	hidden_size	16	Bengalese Finch	without
510	min_segment_dur_majority_vote	0.9786967653228164	0.5526315789473685	0.8054891632666953	1.07510108282085	180	8	TweetyNet	results/Bengalese_Finches/hidden_size/hidden_size_16/Bird4/results_210531_143217	results/Bengalese_Finches/hidden_size/hidden_size_16/Bird4/results_210531_143217/config_BirdsongRecognition_bird04.toml	data/BirdsongRecognition/Bird4/Wave_prep_210528_224959.csv	results/Bengalese_Finches/hidden_size/hidden_size_16/Bird4/results_210531_143217/train_dur_180s/replicate_8/TweetyNet/checkpoints/max-val-acc-checkpoint.pt	results/Bengalese_Finches/hidden_size/hidden_size_16/Bird4/results_210531_143217/train_dur_180s/replicate_8/StandardizeSpect	0.02	2.1303234677183647	Bird4	4	hidden_size	16	Bengalese Finch	with
511	none	0.977357874746542	6.105263157894737	0.7444475745613003	9.48504254728639	180	8	TweetyNet	results/Bengalese_Finches/hidden_size/hidden_size_16/Bird4/results_210531_143217	results/Bengalese_Finches/hidden_size/hidden_size_16/Bird4/results_210531_143217/config_BirdsongRecognition_bird04.toml	data/BirdsongRecognition/Bird4/Wave_prep_210528_224959.csv	results/Bengalese_Finches/hidden_size/hidden_size_16/Bird4/results_210531_143217/train_dur_180s/replicate_8/TweetyNet/checkpoints/max-val-acc-checkpoint.pt	results/Bengalese_Finches/hidden_size/hidden_size_16/Bird4/results_210531_143217/train_dur_180s/replicate_8/StandardizeSpect	0.02	2.264212525345799	Bird4	4	hidden_size	16	Bengalese Finch	without
514	min_segment_dur_majority_vote	0.9791506512355374	0.5263157894736842	0.8077563748735529	0.9358988483521	180	9	TweetyNet	results/Bengalese_Finches/hidden_size/hidden_size_16/Bird4/results_210531_143217	results/Bengalese_Finches/hidden_size/hidden_size_16/Bird4/results_210531_143217/config_BirdsongRecognition_bird04.toml	data/BirdsongRecognition/Bird4/Wave_prep_210528_224959.csv	results/Bengalese_Finches/hidden_size/hidden_size_16/Bird4/results_210531_143217/train_dur_180s/replicate_9/TweetyNet/checkpoints/max-val-acc-checkpoint.pt	results/Bengalese_Finches/hidden_size/hidden_size_16/Bird4/results_210531_143217/train_dur_180s/replicate_9/StandardizeSpect	0.02	2.084934876446265	Bird4	4	hidden_size	16	Bengalese Finch	with
515	none	0.976956418203528	6.894736842105263	0.7240571842692217	11.521342045610549	180	9	TweetyNet	results/Bengalese_Finches/hidden_size/hidden_size_16/Bird4/results_210531_143217	results/Bengalese_Finches/hidden_size/hidden_size_16/Bird4/results_210531_143217/config_BirdsongRecognition_bird04.toml	data/BirdsongRecognition/Bird4/Wave_prep_210528_224959.csv	results/Bengalese_Finches/hidden_size/hidden_size_16/Bird4/results_210531_143217/train_dur_180s/replicate_9/TweetyNet/checkpoints/max-val-acc-checkpoint.pt	results/Bengalese_Finches/hidden_size/hidden_size_16/Bird4/results_210531_143217/train_dur_180s/replicate_9/StandardizeSpect	0.02	2.3043581796472146	Bird4	4	hidden_size	16	Bengalese Finch	without
518	min_segment_dur_majority_vote	0.9777090312764042	0.631578947368421	0.7694433851522313	1.24225371614095	180	10	TweetyNet	results/Bengalese_Finches/hidden_size/hidden_size_16/Bird4/results_210531_143217	results/Bengalese_Finches/hidden_size/hidden_size_16/Bird4/results_210531_143217/config_BirdsongRecognition_bird04.toml	data/BirdsongRecognition/Bird4/Wave_prep_210528_224959.csv	results/Bengalese_Finches/hidden_size/hidden_size_16/Bird4/results_210531_143217/train_dur_180s/replicate_10/TweetyNet/checkpoints/max-val-acc-checkpoint.pt	results/Bengalese_Finches/hidden_size/hidden_size_16/Bird4/results_210531_143217/train_dur_180s/replicate_10/StandardizeSpect	0.02	2.2290968723595816	Bird4	4	hidden_size	16	Bengalese Finch	with
519	none	0.9761505822582028	8.026315789473685	0.7056753731421354	12.9077343355166	180	10	TweetyNet	results/Bengalese_Finches/hidden_size/hidden_size_16/Bird4/results_210531_143217	results/Bengalese_Finches/hidden_size/hidden_size_16/Bird4/results_210531_143217/config_BirdsongRecognition_bird04.toml	data/BirdsongRecognition/Bird4/Wave_prep_210528_224959.csv	results/Bengalese_Finches/hidden_size/hidden_size_16/Bird4/results_210531_143217/train_dur_180s/replicate_10/TweetyNet/checkpoints/max-val-acc-checkpoint.pt	results/Bengalese_Finches/hidden_size/hidden_size_16/Bird4/results_210531_143217/train_dur_180s/replicate_10/StandardizeSpect	0.02	2.3849417741797163	Bird4	4	hidden_size	16	Bengalese Finch	without
522	min_segment_dur_majority_vote	0.9715648077966677	1.3421052631578947	0.6431835872944064	2.28824249679088	45	1	TweetyNet	results/Bengalese_Finches/hidden_size/hidden_size_16/Bird4/results_210531_143217	results/Bengalese_Finches/hidden_size/hidden_size_16/Bird4/results_210531_143217/config_BirdsongRecognition_bird04.toml	data/BirdsongRecognition/Bird4/Wave_prep_210528_224959.csv	results/Bengalese_Finches/hidden_size/hidden_size_16/Bird4/results_210531_143217/train_dur_45s/replicate_1/TweetyNet/checkpoints/max-val-acc-checkpoint.pt	results/Bengalese_Finches/hidden_size/hidden_size_16/Bird4/results_210531_143217/train_dur_45s/replicate_1/StandardizeSpect	0.02	2.843519220333235	Bird4	1	hidden_size	16	Bengalese Finch	with
523	none	0.9677644996444074	12.86842105263158	0.5560632688722911	20.12045395627467	45	1	TweetyNet	results/Bengalese_Finches/hidden_size/hidden_size_16/Bird4/results_210531_143217	results/Bengalese_Finches/hidden_size/hidden_size_16/Bird4/results_210531_143217/config_BirdsongRecognition_bird04.toml	data/BirdsongRecognition/Bird4/Wave_prep_210528_224959.csv	results/Bengalese_Finches/hidden_size/hidden_size_16/Bird4/results_210531_143217/train_dur_45s/replicate_1/TweetyNet/checkpoints/max-val-acc-checkpoint.pt	results/Bengalese_Finches/hidden_size/hidden_size_16/Bird4/results_210531_143217/train_dur_45s/replicate_1/StandardizeSpect	0.02	3.223550035559264	Bird4	1	hidden_size	16	Bengalese Finch	without
526	min_segment_dur_majority_vote	0.9744962774731012	1.105263157894737	0.6893106144088526	1.9942590500376	45	2	TweetyNet	results/Bengalese_Finches/hidden_size/hidden_size_16/Bird4/results_210531_143217	results/Bengalese_Finches/hidden_size/hidden_size_16/Bird4/results_210531_143217/config_BirdsongRecognition_bird04.toml	data/BirdsongRecognition/Bird4/Wave_prep_210528_224959.csv	results/Bengalese_Finches/hidden_size/hidden_size_16/Bird4/results_210531_143217/train_dur_45s/replicate_2/TweetyNet/checkpoints/max-val-acc-checkpoint.pt	results/Bengalese_Finches/hidden_size/hidden_size_16/Bird4/results_210531_143217/train_dur_45s/replicate_2/StandardizeSpect	0.02	2.550372252689892	Bird4	1	hidden_size	16	Bengalese Finch	with
527	none	0.9707808102491874	14.18421052631579	0.5861805307795288	22.04981432449942	45	2	TweetyNet	results/Bengalese_Finches/hidden_size/hidden_size_16/Bird4/results_210531_143217	results/Bengalese_Finches/hidden_size/hidden_size_16/Bird4/results_210531_143217/config_BirdsongRecognition_bird04.toml	data/BirdsongRecognition/Bird4/Wave_prep_210528_224959.csv	results/Bengalese_Finches/hidden_size/hidden_size_16/Bird4/results_210531_143217/train_dur_45s/replicate_2/TweetyNet/checkpoints/max-val-acc-checkpoint.pt	results/Bengalese_Finches/hidden_size/hidden_size_16/Bird4/results_210531_143217/train_dur_45s/replicate_2/StandardizeSpect	0.02	2.9219189750812613	Bird4	1	hidden_size	16	Bengalese Finch	without
530	min_segment_dur_majority_vote	0.9737548918113358	1.0789473684210529	0.6827867154857712	1.99356032906008	45	3	TweetyNet	results/Bengalese_Finches/hidden_size/hidden_size_16/Bird4/results_210531_143217	results/Bengalese_Finches/hidden_size/hidden_size_16/Bird4/results_210531_143217/config_BirdsongRecognition_bird04.toml	data/BirdsongRecognition/Bird4/Wave_prep_210528_224959.csv	results/Bengalese_Finches/hidden_size/hidden_size_16/Bird4/results_210531_143217/train_dur_45s/replicate_3/TweetyNet/checkpoints/max-val-acc-checkpoint.pt	results/Bengalese_Finches/hidden_size/hidden_size_16/Bird4/results_210531_143217/train_dur_45s/replicate_3/StandardizeSpect	0.02	2.624510818866421	Bird4	1	hidden_size	16	Bengalese Finch	with
531	none	0.9711105081807514	11.078947368421051	0.6025028355137426	17.53544446973646	45	3	TweetyNet	results/Bengalese_Finches/hidden_size/hidden_size_16/Bird4/results_210531_143217	results/Bengalese_Finches/hidden_size/hidden_size_16/Bird4/results_210531_143217/config_BirdsongRecognition_bird04.toml	data/BirdsongRecognition/Bird4/Wave_prep_210528_224959.csv	results/Bengalese_Finches/hidden_size/hidden_size_16/Bird4/results_210531_143217/train_dur_45s/replicate_3/TweetyNet/checkpoints/max-val-acc-checkpoint.pt	results/Bengalese_Finches/hidden_size/hidden_size_16/Bird4/results_210531_143217/train_dur_45s/replicate_3/StandardizeSpect	0.02	2.8889491819248603	Bird4	1	hidden_size	16	Bengalese Finch	without
534	min_segment_dur_majority_vote	0.9712202396116764	1.5	0.6475366277134719	2.85979552669792	45	4	TweetyNet	results/Bengalese_Finches/hidden_size/hidden_size_16/Bird4/results_210531_143217	results/Bengalese_Finches/hidden_size/hidden_size_16/Bird4/results_210531_143217/config_BirdsongRecognition_bird04.toml	data/BirdsongRecognition/Bird4/Wave_prep_210528_224959.csv	results/Bengalese_Finches/hidden_size/hidden_size_16/Bird4/results_210531_143217/train_dur_45s/replicate_4/TweetyNet/checkpoints/max-val-acc-checkpoint.pt	results/Bengalese_Finches/hidden_size/hidden_size_16/Bird4/results_210531_143217/train_dur_45s/replicate_4/StandardizeSpect	0.02	2.8779760388323528	Bird4	1	hidden_size	16	Bengalese Finch	with
535	none	0.968956475782614	8.368421052631579	0.5914763093267285	13.594268962754311	45	4	TweetyNet	results/Bengalese_Finches/hidden_size/hidden_size_16/Bird4/results_210531_143217	results/Bengalese_Finches/hidden_size/hidden_size_16/Bird4/results_210531_143217/config_BirdsongRecognition_bird04.toml	data/BirdsongRecognition/Bird4/Wave_prep_210528_224959.csv	results/Bengalese_Finches/hidden_size/hidden_size_16/Bird4/results_210531_143217/train_dur_45s/replicate_4/TweetyNet/checkpoints/max-val-acc-checkpoint.pt	results/Bengalese_Finches/hidden_size/hidden_size_16/Bird4/results_210531_143217/train_dur_45s/replicate_4/StandardizeSpect	0.02	3.1043524217385987	Bird4	1	hidden_size	16	Bengalese Finch	without
538	min_segment_dur_majority_vote	0.9750706930899454	0.8947368421052632	0.7192623265284966	1.56966178848926	45	5	TweetyNet	results/Bengalese_Finches/hidden_size/hidden_size_16/Bird4/results_210531_143217	results/Bengalese_Finches/hidden_size/hidden_size_16/Bird4/results_210531_143217/config_BirdsongRecognition_bird04.toml	data/BirdsongRecognition/Bird4/Wave_prep_210528_224959.csv	results/Bengalese_Finches/hidden_size/hidden_size_16/Bird4/results_210531_143217/train_dur_45s/replicate_5/TweetyNet/checkpoints/max-val-acc-checkpoint.pt	results/Bengalese_Finches/hidden_size/hidden_size_16/Bird4/results_210531_143217/train_dur_45s/replicate_5/StandardizeSpect	0.02	2.492930691005457	Bird4	1	hidden_size	16	Bengalese Finch	with
539	none	0.9727041834096816	9.842105263157896	0.6523456638292735	15.63553333313345	45	5	TweetyNet	results/Bengalese_Finches/hidden_size/hidden_size_16/Bird4/results_210531_143217	results/Bengalese_Finches/hidden_size/hidden_size_16/Bird4/results_210531_143217/config_BirdsongRecognition_bird04.toml	data/BirdsongRecognition/Bird4/Wave_prep_210528_224959.csv	results/Bengalese_Finches/hidden_size/hidden_size_16/Bird4/results_210531_143217/train_dur_45s/replicate_5/TweetyNet/checkpoints/max-val-acc-checkpoint.pt	results/Bengalese_Finches/hidden_size/hidden_size_16/Bird4/results_210531_143217/train_dur_45s/replicate_5/StandardizeSpect	0.02	2.729581659031844	Bird4	1	hidden_size	16	Bengalese Finch	without
542	min_segment_dur_majority_vote	0.9719267475404608	1.368421052631579	0.6789015553849299	2.59379768296642	45	6	TweetyNet	results/Bengalese_Finches/hidden_size/hidden_size_16/Bird4/results_210531_143217	results/Bengalese_Finches/hidden_size/hidden_size_16/Bird4/results_210531_143217/config_BirdsongRecognition_bird04.toml	data/BirdsongRecognition/Bird4/Wave_prep_210528_224959.csv	results/Bengalese_Finches/hidden_size/hidden_size_16/Bird4/results_210531_143217/train_dur_45s/replicate_6/TweetyNet/checkpoints/max-val-acc-checkpoint.pt	results/Bengalese_Finches/hidden_size/hidden_size_16/Bird4/results_210531_143217/train_dur_45s/replicate_6/StandardizeSpect	0.02	2.8073252459539177	Bird4	1	hidden_size	16	Bengalese Finch	with
543	none	0.9675341684429508	14.0	0.5753474115553026	22.07463616437914	45	6	TweetyNet	results/Bengalese_Finches/hidden_size/hidden_size_16/Bird4/results_210531_143217	results/Bengalese_Finches/hidden_size/hidden_size_16/Bird4/results_210531_143217/config_BirdsongRecognition_bird04.toml	data/BirdsongRecognition/Bird4/Wave_prep_210528_224959.csv	results/Bengalese_Finches/hidden_size/hidden_size_16/Bird4/results_210531_143217/train_dur_45s/replicate_6/TweetyNet/checkpoints/max-val-acc-checkpoint.pt	results/Bengalese_Finches/hidden_size/hidden_size_16/Bird4/results_210531_143217/train_dur_45s/replicate_6/StandardizeSpect	0.02	3.2465831557049074	Bird4	1	hidden_size	16	Bengalese Finch	without
546	min_segment_dur_majority_vote	0.9748485954297416	0.8157894736842105	0.7363956438934739	1.3973180544648098	45	7	TweetyNet	results/Bengalese_Finches/hidden_size/hidden_size_16/Bird4/results_210531_143217	results/Bengalese_Finches/hidden_size/hidden_size_16/Bird4/results_210531_143217/config_BirdsongRecognition_bird04.toml	data/BirdsongRecognition/Bird4/Wave_prep_210528_224959.csv	results/Bengalese_Finches/hidden_size/hidden_size_16/Bird4/results_210531_143217/train_dur_45s/replicate_7/TweetyNet/checkpoints/max-val-acc-checkpoint.pt	results/Bengalese_Finches/hidden_size/hidden_size_16/Bird4/results_210531_143217/train_dur_45s/replicate_7/StandardizeSpect	0.02	2.515140457025844	Bird4	1	hidden_size	16	Bengalese Finch	with
547	none	0.9717998334309448	9.86842105263158	0.6460623004349135	15.27248180853556	45	7	TweetyNet	results/Bengalese_Finches/hidden_size/hidden_size_16/Bird4/results_210531_143217	results/Bengalese_Finches/hidden_size/hidden_size_16/Bird4/results_210531_143217/config_BirdsongRecognition_bird04.toml	data/BirdsongRecognition/Bird4/Wave_prep_210528_224959.csv	results/Bengalese_Finches/hidden_size/hidden_size_16/Bird4/results_210531_143217/train_dur_45s/replicate_7/TweetyNet/checkpoints/max-val-acc-checkpoint.pt	results/Bengalese_Finches/hidden_size/hidden_size_16/Bird4/results_210531_143217/train_dur_45s/replicate_7/StandardizeSpect	0.02	2.8200166569055107	Bird4	1	hidden_size	16	Bengalese Finch	without
550	min_segment_dur_majority_vote	0.9762285036732008	0.7894736842105263	0.721330400225227	1.32128569182907	45	8	TweetyNet	results/Bengalese_Finches/hidden_size/hidden_size_16/Bird4/results_210531_143217	results/Bengalese_Finches/hidden_size/hidden_size_16/Bird4/results_210531_143217/config_BirdsongRecognition_bird04.toml	data/BirdsongRecognition/Bird4/Wave_prep_210528_224959.csv	results/Bengalese_Finches/hidden_size/hidden_size_16/Bird4/results_210531_143217/train_dur_45s/replicate_8/TweetyNet/checkpoints/max-val-acc-checkpoint.pt	results/Bengalese_Finches/hidden_size/hidden_size_16/Bird4/results_210531_143217/train_dur_45s/replicate_8/StandardizeSpect	0.02	2.37714963267992	Bird4	1	hidden_size	16	Bengalese Finch	with
551	none	0.973432019621548	12.263157894736842	0.6357625741968321	18.84304903765859	45	8	TweetyNet	results/Bengalese_Finches/hidden_size/hidden_size_16/Bird4/results_210531_143217	results/Bengalese_Finches/hidden_size/hidden_size_16/Bird4/results_210531_143217/config_BirdsongRecognition_bird04.toml	data/BirdsongRecognition/Bird4/Wave_prep_210528_224959.csv	results/Bengalese_Finches/hidden_size/hidden_size_16/Bird4/results_210531_143217/train_dur_45s/replicate_8/TweetyNet/checkpoints/max-val-acc-checkpoint.pt	results/Bengalese_Finches/hidden_size/hidden_size_16/Bird4/results_210531_143217/train_dur_45s/replicate_8/StandardizeSpect	0.02	2.656798037845187	Bird4	1	hidden_size	16	Bengalese Finch	without
554	min_segment_dur_majority_vote	0.9733273429507444	1.131578947368421	0.6793976451353504	1.9778849123486104	45	9	TweetyNet	results/Bengalese_Finches/hidden_size/hidden_size_16/Bird4/results_210531_143217	results/Bengalese_Finches/hidden_size/hidden_size_16/Bird4/results_210531_143217/config_BirdsongRecognition_bird04.toml	data/BirdsongRecognition/Bird4/Wave_prep_210528_224959.csv	results/Bengalese_Finches/hidden_size/hidden_size_16/Bird4/results_210531_143217/train_dur_45s/replicate_9/TweetyNet/checkpoints/max-val-acc-checkpoint.pt	results/Bengalese_Finches/hidden_size/hidden_size_16/Bird4/results_210531_143217/train_dur_45s/replicate_9/StandardizeSpect	0.02	2.667265704925559	Bird4	1	hidden_size	16	Bengalese Finch	with
555	none	0.9699477701211232	13.236842105263158	0.5847911862071427	20.011527678225	45	9	TweetyNet	results/Bengalese_Finches/hidden_size/hidden_size_16/Bird4/results_210531_143217	results/Bengalese_Finches/hidden_size/hidden_size_16/Bird4/results_210531_143217/config_BirdsongRecognition_bird04.toml	data/BirdsongRecognition/Bird4/Wave_prep_210528_224959.csv	results/Bengalese_Finches/hidden_size/hidden_size_16/Bird4/results_210531_143217/train_dur_45s/replicate_9/TweetyNet/checkpoints/max-val-acc-checkpoint.pt	results/Bengalese_Finches/hidden_size/hidden_size_16/Bird4/results_210531_143217/train_dur_45s/replicate_9/StandardizeSpect	0.02	3.00522298788769	Bird4	1	hidden_size	16	Bengalese Finch	without
558	min_segment_dur_majority_vote	0.9726774785421182	1.236842105263158	0.6543511335197523	2.33844052381683	45	10	TweetyNet	results/Bengalese_Finches/hidden_size/hidden_size_16/Bird4/results_210531_143217	results/Bengalese_Finches/hidden_size/hidden_size_16/Bird4/results_210531_143217/config_BirdsongRecognition_bird04.toml	data/BirdsongRecognition/Bird4/Wave_prep_210528_224959.csv	results/Bengalese_Finches/hidden_size/hidden_size_16/Bird4/results_210531_143217/train_dur_45s/replicate_10/TweetyNet/checkpoints/max-val-acc-checkpoint.pt	results/Bengalese_Finches/hidden_size/hidden_size_16/Bird4/results_210531_143217/train_dur_45s/replicate_10/StandardizeSpect	0.02	2.732252145788183	Bird4	1	hidden_size	16	Bengalese Finch	with
559	none	0.9690974948733484	12.947368421052632	0.563896572670618	20.78482092193196	45	10	TweetyNet	results/Bengalese_Finches/hidden_size/hidden_size_16/Bird4/results_210531_143217	results/Bengalese_Finches/hidden_size/hidden_size_16/Bird4/results_210531_143217/config_BirdsongRecognition_bird04.toml	data/BirdsongRecognition/Bird4/Wave_prep_210528_224959.csv	results/Bengalese_Finches/hidden_size/hidden_size_16/Bird4/results_210531_143217/train_dur_45s/replicate_10/TweetyNet/checkpoints/max-val-acc-checkpoint.pt	results/Bengalese_Finches/hidden_size/hidden_size_16/Bird4/results_210531_143217/train_dur_45s/replicate_10/StandardizeSpect	0.02	3.090250512665172	Bird4	1	hidden_size	16	Bengalese Finch	without
562	min_segment_dur_majority_vote	0.9802924905601968	0.5428571428571428	0.8476505099398313	1.06194714242696	75	1	TweetyNet	results/Bengalese_Finches/hidden_size/hidden_size_16/Bird7/results_210531_190257	results/Bengalese_Finches/hidden_size/hidden_size_16/Bird7/results_210531_190257/config_BirdsongRecognition_bird07.toml	data/BirdsongRecognition/Bird7/Wave_prep_210527_213331.csv	results/Bengalese_Finches/hidden_size/hidden_size_16/Bird7/results_210531_190257/train_dur_75s/replicate_1/TweetyNet/checkpoints/max-val-acc-checkpoint.pt	results/Bengalese_Finches/hidden_size/hidden_size_16/Bird7/results_210531_190257/train_dur_75s/replicate_1/StandardizeSpect	0.02	1.970750943980326	Bird7	2	hidden_size	16	Bengalese Finch	with
563	none	0.9772498852191092	11.657142857142857	0.7316363943889659	18.95916750949532	75	1	TweetyNet	results/Bengalese_Finches/hidden_size/hidden_size_16/Bird7/results_210531_190257	results/Bengalese_Finches/hidden_size/hidden_size_16/Bird7/results_210531_190257/config_BirdsongRecognition_bird07.toml	data/BirdsongRecognition/Bird7/Wave_prep_210527_213331.csv	results/Bengalese_Finches/hidden_size/hidden_size_16/Bird7/results_210531_190257/train_dur_75s/replicate_1/TweetyNet/checkpoints/max-val-acc-checkpoint.pt	results/Bengalese_Finches/hidden_size/hidden_size_16/Bird7/results_210531_190257/train_dur_75s/replicate_1/StandardizeSpect	0.02	2.275011478089084	Bird7	2	hidden_size	16	Bengalese Finch	without
566	min_segment_dur_majority_vote	0.9817140628803864	0.2285714285714285	0.8687389518791746	0.39609892880116	75	2	TweetyNet	results/Bengalese_Finches/hidden_size/hidden_size_16/Bird7/results_210531_190257	results/Bengalese_Finches/hidden_size/hidden_size_16/Bird7/results_210531_190257/config_BirdsongRecognition_bird07.toml	data/BirdsongRecognition/Bird7/Wave_prep_210527_213331.csv	results/Bengalese_Finches/hidden_size/hidden_size_16/Bird7/results_210531_190257/train_dur_75s/replicate_2/TweetyNet/checkpoints/max-val-acc-checkpoint.pt	results/Bengalese_Finches/hidden_size/hidden_size_16/Bird7/results_210531_190257/train_dur_75s/replicate_2/StandardizeSpect	0.02	1.828593711961346	Bird7	2	hidden_size	16	Bengalese Finch	with
567	none	0.9769509877258944	14.17142857142857	0.7048759578175476	23.43379172057701	75	2	TweetyNet	results/Bengalese_Finches/hidden_size/hidden_size_16/Bird7/results_210531_190257	results/Bengalese_Finches/hidden_size/hidden_size_16/Bird7/results_210531_190257/config_BirdsongRecognition_bird07.toml	data/BirdsongRecognition/Bird7/Wave_prep_210527_213331.csv	results/Bengalese_Finches/hidden_size/hidden_size_16/Bird7/results_210531_190257/train_dur_75s/replicate_2/TweetyNet/checkpoints/max-val-acc-checkpoint.pt	results/Bengalese_Finches/hidden_size/hidden_size_16/Bird7/results_210531_190257/train_dur_75s/replicate_2/StandardizeSpect	0.02	2.3049012274105607	Bird7	2	hidden_size	16	Bengalese Finch	without
570	min_segment_dur_majority_vote	0.9821440115949992	0.3428571428571428	0.8799808225271092	0.6273742369690299	75	3	TweetyNet	results/Bengalese_Finches/hidden_size/hidden_size_16/Bird7/results_210531_190257	results/Bengalese_Finches/hidden_size/hidden_size_16/Bird7/results_210531_190257/config_BirdsongRecognition_bird07.toml	data/BirdsongRecognition/Bird7/Wave_prep_210527_213331.csv	results/Bengalese_Finches/hidden_size/hidden_size_16/Bird7/results_210531_190257/train_dur_75s/replicate_3/TweetyNet/checkpoints/max-val-acc-checkpoint.pt	results/Bengalese_Finches/hidden_size/hidden_size_16/Bird7/results_210531_190257/train_dur_75s/replicate_3/StandardizeSpect	0.02	1.785598840500091	Bird7	2	hidden_size	16	Bengalese Finch	with
571	none	0.97781542944139	11.82857142857143	0.7292179200620544	19.45133682260773	75	3	TweetyNet	results/Bengalese_Finches/hidden_size/hidden_size_16/Bird7/results_210531_190257	results/Bengalese_Finches/hidden_size/hidden_size_16/Bird7/results_210531_190257/config_BirdsongRecognition_bird07.toml	data/BirdsongRecognition/Bird7/Wave_prep_210527_213331.csv	results/Bengalese_Finches/hidden_size/hidden_size_16/Bird7/results_210531_190257/train_dur_75s/replicate_3/TweetyNet/checkpoints/max-val-acc-checkpoint.pt	results/Bengalese_Finches/hidden_size/hidden_size_16/Bird7/results_210531_190257/train_dur_75s/replicate_3/StandardizeSpect	0.02	2.218457055860989	Bird7	2	hidden_size	16	Bengalese Finch	without
574	min_segment_dur_majority_vote	0.980175595151648	0.6285714285714286	0.8121418038544664	1.04462952426402	75	4	TweetyNet	results/Bengalese_Finches/hidden_size/hidden_size_16/Bird7/results_210531_190257	results/Bengalese_Finches/hidden_size/hidden_size_16/Bird7/results_210531_190257/config_BirdsongRecognition_bird07.toml	data/BirdsongRecognition/Bird7/Wave_prep_210527_213331.csv	results/Bengalese_Finches/hidden_size/hidden_size_16/Bird7/results_210531_190257/train_dur_75s/replicate_4/TweetyNet/checkpoints/max-val-acc-checkpoint.pt	results/Bengalese_Finches/hidden_size/hidden_size_16/Bird7/results_210531_190257/train_dur_75s/replicate_4/StandardizeSpect	0.02	1.9824404848351904	Bird7	2	hidden_size	16	Bengalese Finch	with
575	none	0.9760170007390622	14.314285714285717	0.6842334617903983	22.17501863771259	75	4	TweetyNet	results/Bengalese_Finches/hidden_size/hidden_size_16/Bird7/results_210531_190257	results/Bengalese_Finches/hidden_size/hidden_size_16/Bird7/results_210531_190257/config_BirdsongRecognition_bird07.toml	data/BirdsongRecognition/Bird7/Wave_prep_210527_213331.csv	results/Bengalese_Finches/hidden_size/hidden_size_16/Bird7/results_210531_190257/train_dur_75s/replicate_4/TweetyNet/checkpoints/max-val-acc-checkpoint.pt	results/Bengalese_Finches/hidden_size/hidden_size_16/Bird7/results_210531_190257/train_dur_75s/replicate_4/StandardizeSpect	0.02	2.398299926093783	Bird7	2	hidden_size	16	Bengalese Finch	without
578	min_segment_dur_majority_vote	0.981122071983103	0.3714285714285714	0.8455436333310463	0.63733949919516	75	5	TweetyNet	results/Bengalese_Finches/hidden_size/hidden_size_16/Bird7/results_210531_190257	results/Bengalese_Finches/hidden_size/hidden_size_16/Bird7/results_210531_190257/config_BirdsongRecognition_bird07.toml	data/BirdsongRecognition/Bird7/Wave_prep_210527_213331.csv	results/Bengalese_Finches/hidden_size/hidden_size_16/Bird7/results_210531_190257/train_dur_75s/replicate_5/TweetyNet/checkpoints/max-val-acc-checkpoint.pt	results/Bengalese_Finches/hidden_size/hidden_size_16/Bird7/results_210531_190257/train_dur_75s/replicate_5/StandardizeSpect	0.02	1.8877928016897028	Bird7	2	hidden_size	16	Bengalese Finch	with
579	none	0.976860751790229	13.514285714285714	0.6889187235943248	21.22667530456473	75	5	TweetyNet	results/Bengalese_Finches/hidden_size/hidden_size_16/Bird7/results_210531_190257	results/Bengalese_Finches/hidden_size/hidden_size_16/Bird7/results_210531_190257/config_BirdsongRecognition_bird07.toml	data/BirdsongRecognition/Bird7/Wave_prep_210527_213331.csv	results/Bengalese_Finches/hidden_size/hidden_size_16/Bird7/results_210531_190257/train_dur_75s/replicate_5/TweetyNet/checkpoints/max-val-acc-checkpoint.pt	results/Bengalese_Finches/hidden_size/hidden_size_16/Bird7/results_210531_190257/train_dur_75s/replicate_5/StandardizeSpect	0.02	2.313924820977098	Bird7	2	hidden_size	16	Bengalese Finch	without
582	min_segment_dur_majority_vote	0.9805030796419316	0.6	0.8298787736924655	1.07088581802758	75	6	TweetyNet	results/Bengalese_Finches/hidden_size/hidden_size_16/Bird7/results_210531_190257	results/Bengalese_Finches/hidden_size/hidden_size_16/Bird7/results_210531_190257/config_BirdsongRecognition_bird07.toml	data/BirdsongRecognition/Bird7/Wave_prep_210527_213331.csv	results/Bengalese_Finches/hidden_size/hidden_size_16/Bird7/results_210531_190257/train_dur_75s/replicate_6/TweetyNet/checkpoints/max-val-acc-checkpoint.pt	results/Bengalese_Finches/hidden_size/hidden_size_16/Bird7/results_210531_190257/train_dur_75s/replicate_6/StandardizeSpect	0.02	1.949692035806838	Bird7	2	hidden_size	16	Bengalese Finch	with
583	none	0.977215695516492	14.457142857142856	0.7084512362624046	23.600804934519708	75	6	TweetyNet	results/Bengalese_Finches/hidden_size/hidden_size_16/Bird7/results_210531_190257	results/Bengalese_Finches/hidden_size/hidden_size_16/Bird7/results_210531_190257/config_BirdsongRecognition_bird07.toml	data/BirdsongRecognition/Bird7/Wave_prep_210527_213331.csv	results/Bengalese_Finches/hidden_size/hidden_size_16/Bird7/results_210531_190257/train_dur_75s/replicate_6/TweetyNet/checkpoints/max-val-acc-checkpoint.pt	results/Bengalese_Finches/hidden_size/hidden_size_16/Bird7/results_210531_190257/train_dur_75s/replicate_6/StandardizeSpect	0.02	2.27843044835081	Bird7	2	hidden_size	16	Bengalese Finch	without
586	min_segment_dur_majority_vote	0.9805369757363724	0.4571428571428571	0.860963117320318	0.70535489569188	75	7	TweetyNet	results/Bengalese_Finches/hidden_size/hidden_size_16/Bird7/results_210531_190257	results/Bengalese_Finches/hidden_size/hidden_size_16/Bird7/results_210531_190257/config_BirdsongRecognition_bird07.toml	data/BirdsongRecognition/Bird7/Wave_prep_210527_213331.csv	results/Bengalese_Finches/hidden_size/hidden_size_16/Bird7/results_210531_190257/train_dur_75s/replicate_7/TweetyNet/checkpoints/max-val-acc-checkpoint.pt	results/Bengalese_Finches/hidden_size/hidden_size_16/Bird7/results_210531_190257/train_dur_75s/replicate_7/StandardizeSpect	0.02	1.946302426362756	Bird7	2	hidden_size	16	Bengalese Finch	with
587	none	0.9766919613914344	12.6	0.7300924318338902	20.39116657525205	75	7	TweetyNet	results/Bengalese_Finches/hidden_size/hidden_size_16/Bird7/results_210531_190257	results/Bengalese_Finches/hidden_size/hidden_size_16/Bird7/results_210531_190257/config_BirdsongRecognition_bird07.toml	data/BirdsongRecognition/Bird7/Wave_prep_210527_213331.csv	results/Bengalese_Finches/hidden_size/hidden_size_16/Bird7/results_210531_190257/train_dur_75s/replicate_7/TweetyNet/checkpoints/max-val-acc-checkpoint.pt	results/Bengalese_Finches/hidden_size/hidden_size_16/Bird7/results_210531_190257/train_dur_75s/replicate_7/StandardizeSpect	0.02	2.330803860856568	Bird7	2	hidden_size	16	Bengalese Finch	without
590	min_segment_dur_majority_vote	0.979953321055036	0.8571428571428571	0.7971857862050514	1.46802178967884	75	8	TweetyNet	results/Bengalese_Finches/hidden_size/hidden_size_16/Bird7/results_210531_190257	results/Bengalese_Finches/hidden_size/hidden_size_16/Bird7/results_210531_190257/config_BirdsongRecognition_bird07.toml	data/BirdsongRecognition/Bird7/Wave_prep_210527_213331.csv	results/Bengalese_Finches/hidden_size/hidden_size_16/Bird7/results_210531_190257/train_dur_75s/replicate_8/TweetyNet/checkpoints/max-val-acc-checkpoint.pt	results/Bengalese_Finches/hidden_size/hidden_size_16/Bird7/results_210531_190257/train_dur_75s/replicate_8/StandardizeSpect	0.02	2.0046678944963925	Bird7	2	hidden_size	16	Bengalese Finch	with
591	none	0.9761759576407314	15.6	0.6810121202605818	25.49188968124898	75	8	TweetyNet	results/Bengalese_Finches/hidden_size/hidden_size_16/Bird7/results_210531_190257	results/Bengalese_Finches/hidden_size/hidden_size_16/Bird7/results_210531_190257/config_BirdsongRecognition_bird07.toml	data/BirdsongRecognition/Bird7/Wave_prep_210527_213331.csv	results/Bengalese_Finches/hidden_size/hidden_size_16/Bird7/results_210531_190257/train_dur_75s/replicate_8/TweetyNet/checkpoints/max-val-acc-checkpoint.pt	results/Bengalese_Finches/hidden_size/hidden_size_16/Bird7/results_210531_190257/train_dur_75s/replicate_8/StandardizeSpect	0.02	2.3824042359268605	Bird7	2	hidden_size	16	Bengalese Finch	without
594	min_segment_dur_majority_vote	0.981504766004194	0.2571428571428571	0.8704383624542565	0.50239069986969	75	9	TweetyNet	results/Bengalese_Finches/hidden_size/hidden_size_16/Bird7/results_210531_190257	results/Bengalese_Finches/hidden_size/hidden_size_16/Bird7/results_210531_190257/config_BirdsongRecognition_bird07.toml	data/BirdsongRecognition/Bird7/Wave_prep_210527_213331.csv	results/Bengalese_Finches/hidden_size/hidden_size_16/Bird7/results_210531_190257/train_dur_75s/replicate_9/TweetyNet/checkpoints/max-val-acc-checkpoint.pt	results/Bengalese_Finches/hidden_size/hidden_size_16/Bird7/results_210531_190257/train_dur_75s/replicate_9/StandardizeSpect	0.02	1.8495233995806104	Bird7	2	hidden_size	16	Bengalese Finch	with
595	none	0.977209229281207	13.028571428571428	0.7153251556184429	20.26672596257112	75	9	TweetyNet	results/Bengalese_Finches/hidden_size/hidden_size_16/Bird7/results_210531_190257	results/Bengalese_Finches/hidden_size/hidden_size_16/Bird7/results_210531_190257/config_BirdsongRecognition_bird07.toml	data/BirdsongRecognition/Bird7/Wave_prep_210527_213331.csv	results/Bengalese_Finches/hidden_size/hidden_size_16/Bird7/results_210531_190257/train_dur_75s/replicate_9/TweetyNet/checkpoints/max-val-acc-checkpoint.pt	results/Bengalese_Finches/hidden_size/hidden_size_16/Bird7/results_210531_190257/train_dur_75s/replicate_9/StandardizeSpect	0.02	2.2790770718792985	Bird7	2	hidden_size	16	Bengalese Finch	without
598	min_segment_dur_majority_vote	0.9808621432557754	0.5428571428571428	0.8488651980334053	0.95562582143363	75	10	TweetyNet	results/Bengalese_Finches/hidden_size/hidden_size_16/Bird7/results_210531_190257	results/Bengalese_Finches/hidden_size/hidden_size_16/Bird7/results_210531_190257/config_BirdsongRecognition_bird07.toml	data/BirdsongRecognition/Bird7/Wave_prep_210527_213331.csv	results/Bengalese_Finches/hidden_size/hidden_size_16/Bird7/results_210531_190257/train_dur_75s/replicate_10/TweetyNet/checkpoints/max-val-acc-checkpoint.pt	results/Bengalese_Finches/hidden_size/hidden_size_16/Bird7/results_210531_190257/train_dur_75s/replicate_10/StandardizeSpect	0.02	1.9137856744224635	Bird7	2	hidden_size	16	Bengalese Finch	with
599	none	0.9767528202582796	14.428571428571429	0.7017496808999492	23.1975000815998	75	10	TweetyNet	results/Bengalese_Finches/hidden_size/hidden_size_16/Bird7/results_210531_190257	results/Bengalese_Finches/hidden_size/hidden_size_16/Bird7/results_210531_190257/config_BirdsongRecognition_bird07.toml	data/BirdsongRecognition/Bird7/Wave_prep_210527_213331.csv	results/Bengalese_Finches/hidden_size/hidden_size_16/Bird7/results_210531_190257/train_dur_75s/replicate_10/TweetyNet/checkpoints/max-val-acc-checkpoint.pt	results/Bengalese_Finches/hidden_size/hidden_size_16/Bird7/results_210531_190257/train_dur_75s/replicate_10/StandardizeSpect	0.02	2.3247179741720303	Bird7	2	hidden_size	16	Bengalese Finch	without
602	min_segment_dur_majority_vote	0.982347943529007	0.3142857142857143	0.8894540399206498	0.64235602976523	120	1	TweetyNet	results/Bengalese_Finches/hidden_size/hidden_size_16/Bird7/results_210531_190257	results/Bengalese_Finches/hidden_size/hidden_size_16/Bird7/results_210531_190257/config_BirdsongRecognition_bird07.toml	data/BirdsongRecognition/Bird7/Wave_prep_210527_213331.csv	results/Bengalese_Finches/hidden_size/hidden_size_16/Bird7/results_210531_190257/train_dur_120s/replicate_1/TweetyNet/checkpoints/max-val-acc-checkpoint.pt	results/Bengalese_Finches/hidden_size/hidden_size_16/Bird7/results_210531_190257/train_dur_120s/replicate_1/StandardizeSpect	0.02	1.7652056470992994	Bird7	3	hidden_size	16	Bengalese Finch	with
603	none	0.9786799920234392	10.857142857142858	0.7432682341941694	18.048548072851787	120	1	TweetyNet	results/Bengalese_Finches/hidden_size/hidden_size_16/Bird7/results_210531_190257	results/Bengalese_Finches/hidden_size/hidden_size_16/Bird7/results_210531_190257/config_BirdsongRecognition_bird07.toml	data/BirdsongRecognition/Bird7/Wave_prep_210527_213331.csv	results/Bengalese_Finches/hidden_size/hidden_size_16/Bird7/results_210531_190257/train_dur_120s/replicate_1/TweetyNet/checkpoints/max-val-acc-checkpoint.pt	results/Bengalese_Finches/hidden_size/hidden_size_16/Bird7/results_210531_190257/train_dur_120s/replicate_1/StandardizeSpect	0.02	2.132000797656075	Bird7	3	hidden_size	16	Bengalese Finch	without
606	min_segment_dur_majority_vote	0.9814599315841918	0.4571428571428571	0.8550314781106967	0.80032528111704	120	2	TweetyNet	results/Bengalese_Finches/hidden_size/hidden_size_16/Bird7/results_210531_190257	results/Bengalese_Finches/hidden_size/hidden_size_16/Bird7/results_210531_190257/config_BirdsongRecognition_bird07.toml	data/BirdsongRecognition/Bird7/Wave_prep_210527_213331.csv	results/Bengalese_Finches/hidden_size/hidden_size_16/Bird7/results_210531_190257/train_dur_120s/replicate_2/TweetyNet/checkpoints/max-val-acc-checkpoint.pt	results/Bengalese_Finches/hidden_size/hidden_size_16/Bird7/results_210531_190257/train_dur_120s/replicate_2/StandardizeSpect	0.02	1.854006841580824	Bird7	3	hidden_size	16	Bengalese Finch	with
607	none	0.9787628199075146	9.857142857142858	0.7451990749644111	15.65846012139988	120	2	TweetyNet	results/Bengalese_Finches/hidden_size/hidden_size_16/Bird7/results_210531_190257	results/Bengalese_Finches/hidden_size/hidden_size_16/Bird7/results_210531_190257/config_BirdsongRecognition_bird07.toml	data/BirdsongRecognition/Bird7/Wave_prep_210527_213331.csv	results/Bengalese_Finches/hidden_size/hidden_size_16/Bird7/results_210531_190257/train_dur_120s/replicate_2/TweetyNet/checkpoints/max-val-acc-checkpoint.pt	results/Bengalese_Finches/hidden_size/hidden_size_16/Bird7/results_210531_190257/train_dur_120s/replicate_2/StandardizeSpect	0.02	2.123718009248543	Bird7	3	hidden_size	16	Bengalese Finch	without
610	min_segment_dur_majority_vote	0.9814554419333602	0.5142857142857142	0.8367723482243269	1.01708868597651	120	3	TweetyNet	results/Bengalese_Finches/hidden_size/hidden_size_16/Bird7/results_210531_190257	results/Bengalese_Finches/hidden_size/hidden_size_16/Bird7/results_210531_190257/config_BirdsongRecognition_bird07.toml	data/BirdsongRecognition/Bird7/Wave_prep_210527_213331.csv	results/Bengalese_Finches/hidden_size/hidden_size_16/Bird7/results_210531_190257/train_dur_120s/replicate_3/TweetyNet/checkpoints/max-val-acc-checkpoint.pt	results/Bengalese_Finches/hidden_size/hidden_size_16/Bird7/results_210531_190257/train_dur_120s/replicate_3/StandardizeSpect	0.02	1.85445580666398	Bird7	3	hidden_size	16	Bengalese Finch	with
611	none	0.9789980581714466	10.542857142857144	0.728367025795106	17.224673955908308	120	3	TweetyNet	results/Bengalese_Finches/hidden_size/hidden_size_16/Bird7/results_210531_190257	results/Bengalese_Finches/hidden_size/hidden_size_16/Bird7/results_210531_190257/config_BirdsongRecognition_bird07.toml	data/BirdsongRecognition/Bird7/Wave_prep_210527_213331.csv	results/Bengalese_Finches/hidden_size/hidden_size_16/Bird7/results_210531_190257/train_dur_120s/replicate_3/TweetyNet/checkpoints/max-val-acc-checkpoint.pt	results/Bengalese_Finches/hidden_size/hidden_size_16/Bird7/results_210531_190257/train_dur_120s/replicate_3/StandardizeSpect	0.02	2.1001941828553417	Bird7	3	hidden_size	16	Bengalese Finch	without
614	min_segment_dur_majority_vote	0.9825787279953848	0.3428571428571428	0.8748363210325193	0.63123477473246	120	4	TweetyNet	results/Bengalese_Finches/hidden_size/hidden_size_16/Bird7/results_210531_190257	results/Bengalese_Finches/hidden_size/hidden_size_16/Bird7/results_210531_190257/config_BirdsongRecognition_bird07.toml	data/BirdsongRecognition/Bird7/Wave_prep_210527_213331.csv	results/Bengalese_Finches/hidden_size/hidden_size_16/Bird7/results_210531_190257/train_dur_120s/replicate_4/TweetyNet/checkpoints/max-val-acc-checkpoint.pt	results/Bengalese_Finches/hidden_size/hidden_size_16/Bird7/results_210531_190257/train_dur_120s/replicate_4/StandardizeSpect	0.02	1.7421272004615296	Bird7	3	hidden_size	16	Bengalese Finch	with
615	none	0.979105282573654	10.142857142857142	0.7287858860636	15.769539841631367	120	4	TweetyNet	results/Bengalese_Finches/hidden_size/hidden_size_16/Bird7/results_210531_190257	results/Bengalese_Finches/hidden_size/hidden_size_16/Bird7/results_210531_190257/config_BirdsongRecognition_bird07.toml	data/BirdsongRecognition/Bird7/Wave_prep_210527_213331.csv	results/Bengalese_Finches/hidden_size/hidden_size_16/Bird7/results_210531_190257/train_dur_120s/replicate_4/TweetyNet/checkpoints/max-val-acc-checkpoint.pt	results/Bengalese_Finches/hidden_size/hidden_size_16/Bird7/results_210531_190257/train_dur_120s/replicate_4/StandardizeSpect	0.02	2.089471742634608	Bird7	3	hidden_size	16	Bengalese Finch	without
618	min_segment_dur_majority_vote	0.9809589123080954	0.6	0.858196905036827	1.02837982724073	120	5	TweetyNet	results/Bengalese_Finches/hidden_size/hidden_size_16/Bird7/results_210531_190257	results/Bengalese_Finches/hidden_size/hidden_size_16/Bird7/results_210531_190257/config_BirdsongRecognition_bird07.toml	data/BirdsongRecognition/Bird7/Wave_prep_210527_213331.csv	results/Bengalese_Finches/hidden_size/hidden_size_16/Bird7/results_210531_190257/train_dur_120s/replicate_5/TweetyNet/checkpoints/max-val-acc-checkpoint.pt	results/Bengalese_Finches/hidden_size/hidden_size_16/Bird7/results_210531_190257/train_dur_120s/replicate_5/StandardizeSpect	0.02	1.90410876919046	Bird7	3	hidden_size	16	Bengalese Finch	with
619	none	0.977491217276272	11.17142857142857	0.7359100259754764	19.05129625761851	120	5	TweetyNet	results/Bengalese_Finches/hidden_size/hidden_size_16/Bird7/results_210531_190257	results/Bengalese_Finches/hidden_size/hidden_size_16/Bird7/results_210531_190257/config_BirdsongRecognition_bird07.toml	data/BirdsongRecognition/Bird7/Wave_prep_210527_213331.csv	results/Bengalese_Finches/hidden_size/hidden_size_16/Bird7/results_210531_190257/train_dur_120s/replicate_5/TweetyNet/checkpoints/max-val-acc-checkpoint.pt	results/Bengalese_Finches/hidden_size/hidden_size_16/Bird7/results_210531_190257/train_dur_120s/replicate_5/StandardizeSpect	0.02	2.2508782723728027	Bird7	3	hidden_size	16	Bengalese Finch	without
622	min_segment_dur_majority_vote	0.9822770087336652	0.3428571428571428	0.878325925194955	0.53131634101255	120	6	TweetyNet	results/Bengalese_Finches/hidden_size/hidden_size_16/Bird7/results_210531_190257	results/Bengalese_Finches/hidden_size/hidden_size_16/Bird7/results_210531_190257/config_BirdsongRecognition_bird07.toml	data/BirdsongRecognition/Bird7/Wave_prep_210527_213331.csv	results/Bengalese_Finches/hidden_size/hidden_size_16/Bird7/results_210531_190257/train_dur_120s/replicate_6/TweetyNet/checkpoints/max-val-acc-checkpoint.pt	results/Bengalese_Finches/hidden_size/hidden_size_16/Bird7/results_210531_190257/train_dur_120s/replicate_6/StandardizeSpect	0.02	1.7722991266334809	Bird7	3	hidden_size	16	Bengalese Finch	with
623	none	0.9800256804893748	8.628571428571428	0.7826288846387652	14.293190589649573	120	6	TweetyNet	results/Bengalese_Finches/hidden_size/hidden_size_16/Bird7/results_210531_190257	results/Bengalese_Finches/hidden_size/hidden_size_16/Bird7/results_210531_190257/config_BirdsongRecognition_bird07.toml	data/BirdsongRecognition/Bird7/Wave_prep_210527_213331.csv	results/Bengalese_Finches/hidden_size/hidden_size_16/Bird7/results_210531_190257/train_dur_120s/replicate_6/TweetyNet/checkpoints/max-val-acc-checkpoint.pt	results/Bengalese_Finches/hidden_size/hidden_size_16/Bird7/results_210531_190257/train_dur_120s/replicate_6/StandardizeSpect	0.02	1.9974319510625336	Bird7	3	hidden_size	16	Bengalese Finch	without
626	min_segment_dur_majority_vote	0.9828629333926864	0.3428571428571428	0.8777879401161773	0.58563092902434	120	7	TweetyNet	results/Bengalese_Finches/hidden_size/hidden_size_16/Bird7/results_210531_190257	results/Bengalese_Finches/hidden_size/hidden_size_16/Bird7/results_210531_190257/config_BirdsongRecognition_bird07.toml	data/BirdsongRecognition/Bird7/Wave_prep_210527_213331.csv	results/Bengalese_Finches/hidden_size/hidden_size_16/Bird7/results_210531_190257/train_dur_120s/replicate_7/TweetyNet/checkpoints/max-val-acc-checkpoint.pt	results/Bengalese_Finches/hidden_size/hidden_size_16/Bird7/results_210531_190257/train_dur_120s/replicate_7/StandardizeSpect	0.02	1.7137066607313622	Bird7	3	hidden_size	16	Bengalese Finch	with
627	none	0.9798783244518496	9.057142857142855	0.7577633193773584	14.80944250159193	120	7	TweetyNet	results/Bengalese_Finches/hidden_size/hidden_size_16/Bird7/results_210531_190257	results/Bengalese_Finches/hidden_size/hidden_size_16/Bird7/results_210531_190257/config_BirdsongRecognition_bird07.toml	data/BirdsongRecognition/Bird7/Wave_prep_210527_213331.csv	results/Bengalese_Finches/hidden_size/hidden_size_16/Bird7/results_210531_190257/train_dur_120s/replicate_7/TweetyNet/checkpoints/max-val-acc-checkpoint.pt	results/Bengalese_Finches/hidden_size/hidden_size_16/Bird7/results_210531_190257/train_dur_120s/replicate_7/StandardizeSpect	0.02	2.0121675548150253	Bird7	3	hidden_size	16	Bengalese Finch	without
630	min_segment_dur_majority_vote	0.9819511743085944	0.4285714285714285	0.8556646013999939	0.7592764758391001	120	8	TweetyNet	results/Bengalese_Finches/hidden_size/hidden_size_16/Bird7/results_210531_190257	results/Bengalese_Finches/hidden_size/hidden_size_16/Bird7/results_210531_190257/config_BirdsongRecognition_bird07.toml	data/BirdsongRecognition/Bird7/Wave_prep_210527_213331.csv	results/Bengalese_Finches/hidden_size/hidden_size_16/Bird7/results_210531_190257/train_dur_120s/replicate_8/TweetyNet/checkpoints/max-val-acc-checkpoint.pt	results/Bengalese_Finches/hidden_size/hidden_size_16/Bird7/results_210531_190257/train_dur_120s/replicate_8/StandardizeSpect	0.02	1.8048825691405648	Bird7	3	hidden_size	16	Bengalese Finch	with
631	none	0.9787081172832076	10.257142857142858	0.7396852014987624	17.08271287204689	120	8	TweetyNet	results/Bengalese_Finches/hidden_size/hidden_size_16/Bird7/results_210531_190257	results/Bengalese_Finches/hidden_size/hidden_size_16/Bird7/results_210531_190257/config_BirdsongRecognition_bird07.toml	data/BirdsongRecognition/Bird7/Wave_prep_210527_213331.csv	results/Bengalese_Finches/hidden_size/hidden_size_16/Bird7/results_210531_190257/train_dur_120s/replicate_8/TweetyNet/checkpoints/max-val-acc-checkpoint.pt	results/Bengalese_Finches/hidden_size/hidden_size_16/Bird7/results_210531_190257/train_dur_120s/replicate_8/StandardizeSpect	0.02	2.12918827167925	Bird7	3	hidden_size	16	Bengalese Finch	without
634	min_segment_dur_majority_vote	0.9828021034689892	0.3428571428571428	0.8909032860180706	0.6720070812207599	120	9	TweetyNet	results/Bengalese_Finches/hidden_size/hidden_size_16/Bird7/results_210531_190257	results/Bengalese_Finches/hidden_size/hidden_size_16/Bird7/results_210531_190257/config_BirdsongRecognition_bird07.toml	data/BirdsongRecognition/Bird7/Wave_prep_210527_213331.csv	results/Bengalese_Finches/hidden_size/hidden_size_16/Bird7/results_210531_190257/train_dur_120s/replicate_9/TweetyNet/checkpoints/max-val-acc-checkpoint.pt	results/Bengalese_Finches/hidden_size/hidden_size_16/Bird7/results_210531_190257/train_dur_120s/replicate_9/StandardizeSpect	0.02	1.719789653101067	Bird7	3	hidden_size	16	Bengalese Finch	with
635	none	0.9796268102734824	10.342857142857143	0.763030496874864	16.35332107020712	120	9	TweetyNet	results/Bengalese_Finches/hidden_size/hidden_size_16/Bird7/results_210531_190257	results/Bengalese_Finches/hidden_size/hidden_size_16/Bird7/results_210531_190257/config_BirdsongRecognition_bird07.toml	data/BirdsongRecognition/Bird7/Wave_prep_210527_213331.csv	results/Bengalese_Finches/hidden_size/hidden_size_16/Bird7/results_210531_190257/train_dur_120s/replicate_9/TweetyNet/checkpoints/max-val-acc-checkpoint.pt	results/Bengalese_Finches/hidden_size/hidden_size_16/Bird7/results_210531_190257/train_dur_120s/replicate_9/StandardizeSpect	0.02	2.037318972651758	Bird7	3	hidden_size	16	Bengalese Finch	without
638	min_segment_dur_majority_vote	0.982880765958566	0.2857142857142857	0.8902911770898742	0.52606076040873	120	10	TweetyNet	results/Bengalese_Finches/hidden_size/hidden_size_16/Bird7/results_210531_190257	results/Bengalese_Finches/hidden_size/hidden_size_16/Bird7/results_210531_190257/config_BirdsongRecognition_bird07.toml	data/BirdsongRecognition/Bird7/Wave_prep_210527_213331.csv	results/Bengalese_Finches/hidden_size/hidden_size_16/Bird7/results_210531_190257/train_dur_120s/replicate_10/TweetyNet/checkpoints/max-val-acc-checkpoint.pt	results/Bengalese_Finches/hidden_size/hidden_size_16/Bird7/results_210531_190257/train_dur_120s/replicate_10/StandardizeSpect	0.02	1.7119234041434006	Bird7	3	hidden_size	16	Bengalese Finch	with
639	none	0.9796006700216237	10.485714285714286	0.7507164475031604	17.22381356404151	120	10	TweetyNet	results/Bengalese_Finches/hidden_size/hidden_size_16/Bird7/results_210531_190257	results/Bengalese_Finches/hidden_size/hidden_size_16/Bird7/results_210531_190257/config_BirdsongRecognition_bird07.toml	data/BirdsongRecognition/Bird7/Wave_prep_210527_213331.csv	results/Bengalese_Finches/hidden_size/hidden_size_16/Bird7/results_210531_190257/train_dur_120s/replicate_10/TweetyNet/checkpoints/max-val-acc-checkpoint.pt	results/Bengalese_Finches/hidden_size/hidden_size_16/Bird7/results_210531_190257/train_dur_120s/replicate_10/StandardizeSpect	0.02	2.0399329978376457	Bird7	3	hidden_size	16	Bengalese Finch	without
642	min_segment_dur_majority_vote	0.9838824526092338	0.2857142857142857	0.8876938264527374	0.55166682057438	600	1	TweetyNet	results/Bengalese_Finches/hidden_size/hidden_size_16/Bird7/results_210531_190257	results/Bengalese_Finches/hidden_size/hidden_size_16/Bird7/results_210531_190257/config_BirdsongRecognition_bird07.toml	data/BirdsongRecognition/Bird7/Wave_prep_210527_213331.csv	results/Bengalese_Finches/hidden_size/hidden_size_16/Bird7/results_210531_190257/train_dur_600s/replicate_1/TweetyNet/checkpoints/max-val-acc-checkpoint.pt	results/Bengalese_Finches/hidden_size/hidden_size_16/Bird7/results_210531_190257/train_dur_600s/replicate_1/StandardizeSpect	0.02	1.6117547390766207	Bird7	6	hidden_size	16	Bengalese Finch	with
643	none	0.9812762058318388	7.6	0.7611951056554513	12.2167287984214	600	1	TweetyNet	results/Bengalese_Finches/hidden_size/hidden_size_16/Bird7/results_210531_190257	results/Bengalese_Finches/hidden_size/hidden_size_16/Bird7/results_210531_190257/config_BirdsongRecognition_bird07.toml	data/BirdsongRecognition/Bird7/Wave_prep_210527_213331.csv	results/Bengalese_Finches/hidden_size/hidden_size_16/Bird7/results_210531_190257/train_dur_600s/replicate_1/TweetyNet/checkpoints/max-val-acc-checkpoint.pt	results/Bengalese_Finches/hidden_size/hidden_size_16/Bird7/results_210531_190257/train_dur_600s/replicate_1/StandardizeSpect	0.02	1.8723794168161167	Bird7	6	hidden_size	16	Bengalese Finch	without
646	min_segment_dur_majority_vote	0.9850730357184544	0.1714285714285714	0.9184357308119536	0.2608536088428	600	2	TweetyNet	results/Bengalese_Finches/hidden_size/hidden_size_16/Bird7/results_210531_190257	results/Bengalese_Finches/hidden_size/hidden_size_16/Bird7/results_210531_190257/config_BirdsongRecognition_bird07.toml	data/BirdsongRecognition/Bird7/Wave_prep_210527_213331.csv	results/Bengalese_Finches/hidden_size/hidden_size_16/Bird7/results_210531_190257/train_dur_600s/replicate_2/TweetyNet/checkpoints/max-val-acc-checkpoint.pt	results/Bengalese_Finches/hidden_size/hidden_size_16/Bird7/results_210531_190257/train_dur_600s/replicate_2/StandardizeSpect	0.02	1.4926964281545607	Bird7	6	hidden_size	16	Bengalese Finch	with
647	none	0.9820599785217776	7.857142857142857	0.7765872764278874	12.46635318761599	600	2	TweetyNet	results/Bengalese_Finches/hidden_size/hidden_size_16/Bird7/results_210531_190257	results/Bengalese_Finches/hidden_size/hidden_size_16/Bird7/results_210531_190257/config_BirdsongRecognition_bird07.toml	data/BirdsongRecognition/Bird7/Wave_prep_210527_213331.csv	results/Bengalese_Finches/hidden_size/hidden_size_16/Bird7/results_210531_190257/train_dur_600s/replicate_2/TweetyNet/checkpoints/max-val-acc-checkpoint.pt	results/Bengalese_Finches/hidden_size/hidden_size_16/Bird7/results_210531_190257/train_dur_600s/replicate_2/StandardizeSpect	0.02	1.794002147822238	Bird7	6	hidden_size	16	Bengalese Finch	without
650	min_segment_dur_majority_vote	0.9844893440470716	0.2	0.9178970630291632	0.38982186281105	600	3	TweetyNet	results/Bengalese_Finches/hidden_size/hidden_size_16/Bird7/results_210531_190257	results/Bengalese_Finches/hidden_size/hidden_size_16/Bird7/results_210531_190257/config_BirdsongRecognition_bird07.toml	data/BirdsongRecognition/Bird7/Wave_prep_210527_213331.csv	results/Bengalese_Finches/hidden_size/hidden_size_16/Bird7/results_210531_190257/train_dur_600s/replicate_3/TweetyNet/checkpoints/max-val-acc-checkpoint.pt	results/Bengalese_Finches/hidden_size/hidden_size_16/Bird7/results_210531_190257/train_dur_600s/replicate_3/StandardizeSpect	0.02	1.5510655952928445	Bird7	6	hidden_size	16	Bengalese Finch	with
651	none	0.9824933594378558	6.514285714285714	0.8105183019306438	10.563229662881367	600	3	TweetyNet	results/Bengalese_Finches/hidden_size/hidden_size_16/Bird7/results_210531_190257	results/Bengalese_Finches/hidden_size/hidden_size_16/Bird7/results_210531_190257/config_BirdsongRecognition_bird07.toml	data/BirdsongRecognition/Bird7/Wave_prep_210527_213331.csv	results/Bengalese_Finches/hidden_size/hidden_size_16/Bird7/results_210531_190257/train_dur_600s/replicate_3/TweetyNet/checkpoints/max-val-acc-checkpoint.pt	results/Bengalese_Finches/hidden_size/hidden_size_16/Bird7/results_210531_190257/train_dur_600s/replicate_3/StandardizeSpect	0.02	1.7506640562144238	Bird7	6	hidden_size	16	Bengalese Finch	without
654	min_segment_dur_majority_vote	0.9833040622530634	0.3142857142857143	0.8844533292881936	0.62953266374092	600	4	TweetyNet	results/Bengalese_Finches/hidden_size/hidden_size_16/Bird7/results_210531_190257	results/Bengalese_Finches/hidden_size/hidden_size_16/Bird7/results_210531_190257/config_BirdsongRecognition_bird07.toml	data/BirdsongRecognition/Bird7/Wave_prep_210527_213331.csv	results/Bengalese_Finches/hidden_size/hidden_size_16/Bird7/results_210531_190257/train_dur_600s/replicate_4/TweetyNet/checkpoints/max-val-acc-checkpoint.pt	results/Bengalese_Finches/hidden_size/hidden_size_16/Bird7/results_210531_190257/train_dur_600s/replicate_4/StandardizeSpect	0.02	1.6695937746936562	Bird7	6	hidden_size	16	Bengalese Finch	with
655	none	0.9820007551071956	6.285714285714286	0.8135390290620513	10.50558676000038	600	4	TweetyNet	results/Bengalese_Finches/hidden_size/hidden_size_16/Bird7/results_210531_190257	results/Bengalese_Finches/hidden_size/hidden_size_16/Bird7/results_210531_190257/config_BirdsongRecognition_bird07.toml	data/BirdsongRecognition/Bird7/Wave_prep_210527_213331.csv	results/Bengalese_Finches/hidden_size/hidden_size_16/Bird7/results_210531_190257/train_dur_600s/replicate_4/TweetyNet/checkpoints/max-val-acc-checkpoint.pt	results/Bengalese_Finches/hidden_size/hidden_size_16/Bird7/results_210531_190257/train_dur_600s/replicate_4/StandardizeSpect	0.02	1.7999244892804356	Bird7	6	hidden_size	16	Bengalese Finch	without
658	min_segment_dur_majority_vote	0.9845363051450554	0.2	0.9077371260539208	0.429094714809	600	5	TweetyNet	results/Bengalese_Finches/hidden_size/hidden_size_16/Bird7/results_210531_190257	results/Bengalese_Finches/hidden_size/hidden_size_16/Bird7/results_210531_190257/config_BirdsongRecognition_bird07.toml	data/BirdsongRecognition/Bird7/Wave_prep_210527_213331.csv	results/Bengalese_Finches/hidden_size/hidden_size_16/Bird7/results_210531_190257/train_dur_600s/replicate_5/TweetyNet/checkpoints/max-val-acc-checkpoint.pt	results/Bengalese_Finches/hidden_size/hidden_size_16/Bird7/results_210531_190257/train_dur_600s/replicate_5/StandardizeSpect	0.02	1.5463694854944587	Bird7	6	hidden_size	16	Bengalese Finch	with
659	none	0.982607951393038	6.971428571428572	0.8073689860465774	11.47724644458136	600	5	TweetyNet	results/Bengalese_Finches/hidden_size/hidden_size_16/Bird7/results_210531_190257	results/Bengalese_Finches/hidden_size/hidden_size_16/Bird7/results_210531_190257/config_BirdsongRecognition_bird07.toml	data/BirdsongRecognition/Bird7/Wave_prep_210527_213331.csv	results/Bengalese_Finches/hidden_size/hidden_size_16/Bird7/results_210531_190257/train_dur_600s/replicate_5/TweetyNet/checkpoints/max-val-acc-checkpoint.pt	results/Bengalese_Finches/hidden_size/hidden_size_16/Bird7/results_210531_190257/train_dur_600s/replicate_5/StandardizeSpect	0.02	1.7392048606961863	Bird7	6	hidden_size	16	Bengalese Finch	without
662	min_segment_dur_majority_vote	0.9845676236296852	0.2285714285714285	0.9027950941979366	0.40695835250708	600	6	TweetyNet	results/Bengalese_Finches/hidden_size/hidden_size_16/Bird7/results_210531_190257	results/Bengalese_Finches/hidden_size/hidden_size_16/Bird7/results_210531_190257/config_BirdsongRecognition_bird07.toml	data/BirdsongRecognition/Bird7/Wave_prep_210527_213331.csv	results/Bengalese_Finches/hidden_size/hidden_size_16/Bird7/results_210531_190257/train_dur_600s/replicate_6/TweetyNet/checkpoints/max-val-acc-checkpoint.pt	results/Bengalese_Finches/hidden_size/hidden_size_16/Bird7/results_210531_190257/train_dur_600s/replicate_6/StandardizeSpect	0.02	1.543237637031469	Bird7	6	hidden_size	16	Bengalese Finch	with
663	none	0.9822120210792076	6.971428571428572	0.7855522853857607	11.44190217831884	600	6	TweetyNet	results/Bengalese_Finches/hidden_size/hidden_size_16/Bird7/results_210531_190257	results/Bengalese_Finches/hidden_size/hidden_size_16/Bird7/results_210531_190257/config_BirdsongRecognition_bird07.toml	data/BirdsongRecognition/Bird7/Wave_prep_210527_213331.csv	results/Bengalese_Finches/hidden_size/hidden_size_16/Bird7/results_210531_190257/train_dur_600s/replicate_6/TweetyNet/checkpoints/max-val-acc-checkpoint.pt	results/Bengalese_Finches/hidden_size/hidden_size_16/Bird7/results_210531_190257/train_dur_600s/replicate_6/StandardizeSpect	0.02	1.7787978920792311	Bird7	6	hidden_size	16	Bengalese Finch	without
666	min_segment_dur_majority_vote	0.983771701145776	0.2857142857142857	0.8951025595196935	0.58159117922905	600	7	TweetyNet	results/Bengalese_Finches/hidden_size/hidden_size_16/Bird7/results_210531_190257	results/Bengalese_Finches/hidden_size/hidden_size_16/Bird7/results_210531_190257/config_BirdsongRecognition_bird07.toml	data/BirdsongRecognition/Bird7/Wave_prep_210527_213331.csv	results/Bengalese_Finches/hidden_size/hidden_size_16/Bird7/results_210531_190257/train_dur_600s/replicate_7/TweetyNet/checkpoints/max-val-acc-checkpoint.pt	results/Bengalese_Finches/hidden_size/hidden_size_16/Bird7/results_210531_190257/train_dur_600s/replicate_7/StandardizeSpect	0.02	1.6228298854224057	Bird7	6	hidden_size	16	Bengalese Finch	with
667	none	0.9819556302181774	7.171428571428572	0.7974965181697754	11.733670694840953	600	7	TweetyNet	results/Bengalese_Finches/hidden_size/hidden_size_16/Bird7/results_210531_190257	results/Bengalese_Finches/hidden_size/hidden_size_16/Bird7/results_210531_190257/config_BirdsongRecognition_bird07.toml	data/BirdsongRecognition/Bird7/Wave_prep_210527_213331.csv	results/Bengalese_Finches/hidden_size/hidden_size_16/Bird7/results_210531_190257/train_dur_600s/replicate_7/TweetyNet/checkpoints/max-val-acc-checkpoint.pt	results/Bengalese_Finches/hidden_size/hidden_size_16/Bird7/results_210531_190257/train_dur_600s/replicate_7/StandardizeSpect	0.02	1.804436978182256	Bird7	6	hidden_size	16	Bengalese Finch	without
670	min_segment_dur_majority_vote	0.9840155639823538	0.2571428571428571	0.90106214062501	0.43623423728465	600	8	TweetyNet	results/Bengalese_Finches/hidden_size/hidden_size_16/Bird7/results_210531_190257	results/Bengalese_Finches/hidden_size/hidden_size_16/Bird7/results_210531_190257/config_BirdsongRecognition_bird07.toml	data/BirdsongRecognition/Bird7/Wave_prep_210527_213331.csv	results/Bengalese_Finches/hidden_size/hidden_size_16/Bird7/results_210531_190257/train_dur_600s/replicate_8/TweetyNet/checkpoints/max-val-acc-checkpoint.pt	results/Bengalese_Finches/hidden_size/hidden_size_16/Bird7/results_210531_190257/train_dur_600s/replicate_8/StandardizeSpect	0.02	1.5984436017646209	Bird7	6	hidden_size	16	Bengalese Finch	with
671	none	0.982262415763248	5.771428571428571	0.8111877441321321	9.40333650467597	600	8	TweetyNet	results/Bengalese_Finches/hidden_size/hidden_size_16/Bird7/results_210531_190257	results/Bengalese_Finches/hidden_size/hidden_size_16/Bird7/results_210531_190257/config_BirdsongRecognition_bird07.toml	data/BirdsongRecognition/Bird7/Wave_prep_210527_213331.csv	results/Bengalese_Finches/hidden_size/hidden_size_16/Bird7/results_210531_190257/train_dur_600s/replicate_8/TweetyNet/checkpoints/max-val-acc-checkpoint.pt	results/Bengalese_Finches/hidden_size/hidden_size_16/Bird7/results_210531_190257/train_dur_600s/replicate_8/StandardizeSpect	0.02	1.7737584236751869	Bird7	6	hidden_size	16	Bengalese Finch	without
674	min_segment_dur_majority_vote	0.9841983484797538	0.2571428571428571	0.8916110819250544	0.45691038653223	600	9	TweetyNet	results/Bengalese_Finches/hidden_size/hidden_size_16/Bird7/results_210531_190257	results/Bengalese_Finches/hidden_size/hidden_size_16/Bird7/results_210531_190257/config_BirdsongRecognition_bird07.toml	data/BirdsongRecognition/Bird7/Wave_prep_210527_213331.csv	results/Bengalese_Finches/hidden_size/hidden_size_16/Bird7/results_210531_190257/train_dur_600s/replicate_9/TweetyNet/checkpoints/max-val-acc-checkpoint.pt	results/Bengalese_Finches/hidden_size/hidden_size_16/Bird7/results_210531_190257/train_dur_600s/replicate_9/StandardizeSpect	0.02	1.5801651520246152	Bird7	6	hidden_size	16	Bengalese Finch	with
675	none	0.9825561672272296	6.8	0.7979666016525551	10.8377484037226	600	9	TweetyNet	results/Bengalese_Finches/hidden_size/hidden_size_16/Bird7/results_210531_190257	results/Bengalese_Finches/hidden_size/hidden_size_16/Bird7/results_210531_190257/config_BirdsongRecognition_bird07.toml	data/BirdsongRecognition/Bird7/Wave_prep_210527_213331.csv	results/Bengalese_Finches/hidden_size/hidden_size_16/Bird7/results_210531_190257/train_dur_600s/replicate_9/TweetyNet/checkpoints/max-val-acc-checkpoint.pt	results/Bengalese_Finches/hidden_size/hidden_size_16/Bird7/results_210531_190257/train_dur_600s/replicate_9/StandardizeSpect	0.02	1.744383277277051	Bird7	6	hidden_size	16	Bengalese Finch	without
678	min_segment_dur_majority_vote	0.9841575125604068	0.2285714285714285	0.899079220860828	0.43099145085545	600	10	TweetyNet	results/Bengalese_Finches/hidden_size/hidden_size_16/Bird7/results_210531_190257	results/Bengalese_Finches/hidden_size/hidden_size_16/Bird7/results_210531_190257/config_BirdsongRecognition_bird07.toml	data/BirdsongRecognition/Bird7/Wave_prep_210527_213331.csv	results/Bengalese_Finches/hidden_size/hidden_size_16/Bird7/results_210531_190257/train_dur_600s/replicate_10/TweetyNet/checkpoints/max-val-acc-checkpoint.pt	results/Bengalese_Finches/hidden_size/hidden_size_16/Bird7/results_210531_190257/train_dur_600s/replicate_10/StandardizeSpect	0.02	1.5842487439593156	Bird7	6	hidden_size	16	Bengalese Finch	with
679	none	0.981593047116809	8.457142857142857	0.7800538570813801	13.61247161447205	600	10	TweetyNet	results/Bengalese_Finches/hidden_size/hidden_size_16/Bird7/results_210531_190257	results/Bengalese_Finches/hidden_size/hidden_size_16/Bird7/results_210531_190257/config_BirdsongRecognition_bird07.toml	data/BirdsongRecognition/Bird7/Wave_prep_210527_213331.csv	results/Bengalese_Finches/hidden_size/hidden_size_16/Bird7/results_210531_190257/train_dur_600s/replicate_10/TweetyNet/checkpoints/max-val-acc-checkpoint.pt	results/Bengalese_Finches/hidden_size/hidden_size_16/Bird7/results_210531_190257/train_dur_600s/replicate_10/StandardizeSpect	0.02	1.8406952883191048	Bird7	6	hidden_size	16	Bengalese Finch	without
682	min_segment_dur_majority_vote	0.9842828794249062	0.2571428571428571	0.9021248621855764	0.54288320209146	480	1	TweetyNet	results/Bengalese_Finches/hidden_size/hidden_size_16/Bird7/results_210531_190257	results/Bengalese_Finches/hidden_size/hidden_size_16/Bird7/results_210531_190257/config_BirdsongRecognition_bird07.toml	data/BirdsongRecognition/Bird7/Wave_prep_210527_213331.csv	results/Bengalese_Finches/hidden_size/hidden_size_16/Bird7/results_210531_190257/train_dur_480s/replicate_1/TweetyNet/checkpoints/max-val-acc-checkpoint.pt	results/Bengalese_Finches/hidden_size/hidden_size_16/Bird7/results_210531_190257/train_dur_480s/replicate_1/StandardizeSpect	0.02	1.571712057509378	Bird7	5	hidden_size	16	Bengalese Finch	with
683	none	0.9823708894029676	5.714285714285714	0.7997235388586997	9.436126166783987	480	1	TweetyNet	results/Bengalese_Finches/hidden_size/hidden_size_16/Bird7/results_210531_190257	results/Bengalese_Finches/hidden_size/hidden_size_16/Bird7/results_210531_190257/config_BirdsongRecognition_bird07.toml	data/BirdsongRecognition/Bird7/Wave_prep_210527_213331.csv	results/Bengalese_Finches/hidden_size/hidden_size_16/Bird7/results_210531_190257/train_dur_480s/replicate_1/TweetyNet/checkpoints/max-val-acc-checkpoint.pt	results/Bengalese_Finches/hidden_size/hidden_size_16/Bird7/results_210531_190257/train_dur_480s/replicate_1/StandardizeSpect	0.02	1.7629110597032316	Bird7	5	hidden_size	16	Bengalese Finch	without
686	min_segment_dur_majority_vote	0.9839425427114667	0.2857142857142857	0.8959545426217155	0.53049696564335	480	2	TweetyNet	results/Bengalese_Finches/hidden_size/hidden_size_16/Bird7/results_210531_190257	results/Bengalese_Finches/hidden_size/hidden_size_16/Bird7/results_210531_190257/config_BirdsongRecognition_bird07.toml	data/BirdsongRecognition/Bird7/Wave_prep_210527_213331.csv	results/Bengalese_Finches/hidden_size/hidden_size_16/Bird7/results_210531_190257/train_dur_480s/replicate_2/TweetyNet/checkpoints/max-val-acc-checkpoint.pt	results/Bengalese_Finches/hidden_size/hidden_size_16/Bird7/results_210531_190257/train_dur_480s/replicate_2/StandardizeSpect	0.02	1.605745728853314	Bird7	5	hidden_size	16	Bengalese Finch	with
687	none	0.9817765356595972	7.3428571428571425	0.7867479893590886	11.940384430409209	480	2	TweetyNet	results/Bengalese_Finches/hidden_size/hidden_size_16/Bird7/results_210531_190257	results/Bengalese_Finches/hidden_size/hidden_size_16/Bird7/results_210531_190257/config_BirdsongRecognition_bird07.toml	data/BirdsongRecognition/Bird7/Wave_prep_210527_213331.csv	results/Bengalese_Finches/hidden_size/hidden_size_16/Bird7/results_210531_190257/train_dur_480s/replicate_2/TweetyNet/checkpoints/max-val-acc-checkpoint.pt	results/Bengalese_Finches/hidden_size/hidden_size_16/Bird7/results_210531_190257/train_dur_480s/replicate_2/StandardizeSpect	0.02	1.8223464340402784	Bird7	5	hidden_size	16	Bengalese Finch	without
690	min_segment_dur_majority_vote	0.9830694023822828	0.2857142857142857	0.8823701899512025	0.54595787828962	480	3	TweetyNet	results/Bengalese_Finches/hidden_size/hidden_size_16/Bird7/results_210531_190257	results/Bengalese_Finches/hidden_size/hidden_size_16/Bird7/results_210531_190257/config_BirdsongRecognition_bird07.toml	data/BirdsongRecognition/Bird7/Wave_prep_210527_213331.csv	results/Bengalese_Finches/hidden_size/hidden_size_16/Bird7/results_210531_190257/train_dur_480s/replicate_3/TweetyNet/checkpoints/max-val-acc-checkpoint.pt	results/Bengalese_Finches/hidden_size/hidden_size_16/Bird7/results_210531_190257/train_dur_480s/replicate_3/StandardizeSpect	0.02	1.6930597617717091	Bird7	5	hidden_size	16	Bengalese Finch	with
691	none	0.9804878633402668	8.371428571428572	0.759664353309241	13.500565533290478	480	3	TweetyNet	results/Bengalese_Finches/hidden_size/hidden_size_16/Bird7/results_210531_190257	results/Bengalese_Finches/hidden_size/hidden_size_16/Bird7/results_210531_190257/config_BirdsongRecognition_bird07.toml	data/BirdsongRecognition/Bird7/Wave_prep_210527_213331.csv	results/Bengalese_Finches/hidden_size/hidden_size_16/Bird7/results_210531_190257/train_dur_480s/replicate_3/TweetyNet/checkpoints/max-val-acc-checkpoint.pt	results/Bengalese_Finches/hidden_size/hidden_size_16/Bird7/results_210531_190257/train_dur_480s/replicate_3/StandardizeSpect	0.02	1.951213665973317	Bird7	5	hidden_size	16	Bengalese Finch	without
694	min_segment_dur_majority_vote	0.9843716687775688	0.2571428571428571	0.9052066732839624	0.4588383736651599	480	4	TweetyNet	results/Bengalese_Finches/hidden_size/hidden_size_16/Bird7/results_210531_190257	results/Bengalese_Finches/hidden_size/hidden_size_16/Bird7/results_210531_190257/config_BirdsongRecognition_bird07.toml	data/BirdsongRecognition/Bird7/Wave_prep_210527_213331.csv	results/Bengalese_Finches/hidden_size/hidden_size_16/Bird7/results_210531_190257/train_dur_480s/replicate_4/TweetyNet/checkpoints/max-val-acc-checkpoint.pt	results/Bengalese_Finches/hidden_size/hidden_size_16/Bird7/results_210531_190257/train_dur_480s/replicate_4/StandardizeSpect	0.02	1.5628331222431124	Bird7	5	hidden_size	16	Bengalese Finch	with
695	none	0.9814796749057936	7.771428571428571	0.7753172483550099	12.410466548725338	480	4	TweetyNet	results/Bengalese_Finches/hidden_size/hidden_size_16/Bird7/results_210531_190257	results/Bengalese_Finches/hidden_size/hidden_size_16/Bird7/results_210531_190257/config_BirdsongRecognition_bird07.toml	data/BirdsongRecognition/Bird7/Wave_prep_210527_213331.csv	results/Bengalese_Finches/hidden_size/hidden_size_16/Bird7/results_210531_190257/train_dur_480s/replicate_4/TweetyNet/checkpoints/max-val-acc-checkpoint.pt	results/Bengalese_Finches/hidden_size/hidden_size_16/Bird7/results_210531_190257/train_dur_480s/replicate_4/StandardizeSpect	0.02	1.852032509420632	Bird7	5	hidden_size	16	Bengalese Finch	without
698	min_segment_dur_majority_vote	0.9834908873785188	0.1714285714285714	0.9011862563790254	0.31571603000174	480	5	TweetyNet	results/Bengalese_Finches/hidden_size/hidden_size_16/Bird7/results_210531_190257	results/Bengalese_Finches/hidden_size/hidden_size_16/Bird7/results_210531_190257/config_BirdsongRecognition_bird07.toml	data/BirdsongRecognition/Bird7/Wave_prep_210527_213331.csv	results/Bengalese_Finches/hidden_size/hidden_size_16/Bird7/results_210531_190257/train_dur_480s/replicate_5/TweetyNet/checkpoints/max-val-acc-checkpoint.pt	results/Bengalese_Finches/hidden_size/hidden_size_16/Bird7/results_210531_190257/train_dur_480s/replicate_5/StandardizeSpect	0.02	1.6509112621481248	Bird7	5	hidden_size	16	Bengalese Finch	with
699	none	0.9807407211099396	9.82857142857143	0.7694755533218262	15.62648944197218	480	5	TweetyNet	results/Bengalese_Finches/hidden_size/hidden_size_16/Bird7/results_210531_190257	results/Bengalese_Finches/hidden_size/hidden_size_16/Bird7/results_210531_190257/config_BirdsongRecognition_bird07.toml	data/BirdsongRecognition/Bird7/Wave_prep_210527_213331.csv	results/Bengalese_Finches/hidden_size/hidden_size_16/Bird7/results_210531_190257/train_dur_480s/replicate_5/TweetyNet/checkpoints/max-val-acc-checkpoint.pt	results/Bengalese_Finches/hidden_size/hidden_size_16/Bird7/results_210531_190257/train_dur_480s/replicate_5/StandardizeSpect	0.02	1.9259278890060405	Bird7	5	hidden_size	16	Bengalese Finch	without
702	min_segment_dur_majority_vote	0.983348648624719	0.2571428571428571	0.8872595192498173	0.38378586662781	480	6	TweetyNet	results/Bengalese_Finches/hidden_size/hidden_size_16/Bird7/results_210531_190257	results/Bengalese_Finches/hidden_size/hidden_size_16/Bird7/results_210531_190257/config_BirdsongRecognition_bird07.toml	data/BirdsongRecognition/Bird7/Wave_prep_210527_213331.csv	results/Bengalese_Finches/hidden_size/hidden_size_16/Bird7/results_210531_190257/train_dur_480s/replicate_6/TweetyNet/checkpoints/max-val-acc-checkpoint.pt	results/Bengalese_Finches/hidden_size/hidden_size_16/Bird7/results_210531_190257/train_dur_480s/replicate_6/StandardizeSpect	0.02	1.6651351375280954	Bird7	5	hidden_size	16	Bengalese Finch	with
703	none	0.9813552804243812	7.485714285714286	0.8007662833091211	11.39302153148917	480	6	TweetyNet	results/Bengalese_Finches/hidden_size/hidden_size_16/Bird7/results_210531_190257	results/Bengalese_Finches/hidden_size/hidden_size_16/Bird7/results_210531_190257/config_BirdsongRecognition_bird07.toml	data/BirdsongRecognition/Bird7/Wave_prep_210527_213331.csv	results/Bengalese_Finches/hidden_size/hidden_size_16/Bird7/results_210531_190257/train_dur_480s/replicate_6/TweetyNet/checkpoints/max-val-acc-checkpoint.pt	results/Bengalese_Finches/hidden_size/hidden_size_16/Bird7/results_210531_190257/train_dur_480s/replicate_6/StandardizeSpect	0.02	1.8644719575618751	Bird7	5	hidden_size	16	Bengalese Finch	without
706	min_segment_dur_majority_vote	0.984980381204415	0.1714285714285714	0.9159112470997368	0.31492501592169	480	7	TweetyNet	results/Bengalese_Finches/hidden_size/hidden_size_16/Bird7/results_210531_190257	results/Bengalese_Finches/hidden_size/hidden_size_16/Bird7/results_210531_190257/config_BirdsongRecognition_bird07.toml	data/BirdsongRecognition/Bird7/Wave_prep_210527_213331.csv	results/Bengalese_Finches/hidden_size/hidden_size_16/Bird7/results_210531_190257/train_dur_480s/replicate_7/TweetyNet/checkpoints/max-val-acc-checkpoint.pt	results/Bengalese_Finches/hidden_size/hidden_size_16/Bird7/results_210531_190257/train_dur_480s/replicate_7/StandardizeSpect	0.02	1.5019618795585	Bird7	5	hidden_size	16	Bengalese Finch	with
707	none	0.982804710241308	4.828571428571428	0.7975920907296916	7.72549633935106	480	7	TweetyNet	results/Bengalese_Finches/hidden_size/hidden_size_16/Bird7/results_210531_190257	results/Bengalese_Finches/hidden_size/hidden_size_16/Bird7/results_210531_190257/config_BirdsongRecognition_bird07.toml	data/BirdsongRecognition/Bird7/Wave_prep_210527_213331.csv	results/Bengalese_Finches/hidden_size/hidden_size_16/Bird7/results_210531_190257/train_dur_480s/replicate_7/TweetyNet/checkpoints/max-val-acc-checkpoint.pt	results/Bengalese_Finches/hidden_size/hidden_size_16/Bird7/results_210531_190257/train_dur_480s/replicate_7/StandardizeSpect	0.02	1.7195289758692112	Bird7	5	hidden_size	16	Bengalese Finch	without
710	min_segment_dur_majority_vote	0.9846327721582276	0.2	0.9110528251196122	0.37619622522836	480	8	TweetyNet	results/Bengalese_Finches/hidden_size/hidden_size_16/Bird7/results_210531_190257	results/Bengalese_Finches/hidden_size/hidden_size_16/Bird7/results_210531_190257/config_BirdsongRecognition_bird07.toml	data/BirdsongRecognition/Bird7/Wave_prep_210527_213331.csv	results/Bengalese_Finches/hidden_size/hidden_size_16/Bird7/results_210531_190257/train_dur_480s/replicate_8/TweetyNet/checkpoints/max-val-acc-checkpoint.pt	results/Bengalese_Finches/hidden_size/hidden_size_16/Bird7/results_210531_190257/train_dur_480s/replicate_8/StandardizeSpect	0.02	1.5367227841772355	Bird7	5	hidden_size	16	Bengalese Finch	with
711	none	0.9824254013710092	6.571428571428571	0.794831054705532	10.53514945022441	480	8	TweetyNet	results/Bengalese_Finches/hidden_size/hidden_size_16/Bird7/results_210531_190257	results/Bengalese_Finches/hidden_size/hidden_size_16/Bird7/results_210531_190257/config_BirdsongRecognition_bird07.toml	data/BirdsongRecognition/Bird7/Wave_prep_210527_213331.csv	results/Bengalese_Finches/hidden_size/hidden_size_16/Bird7/results_210531_190257/train_dur_480s/replicate_8/TweetyNet/checkpoints/max-val-acc-checkpoint.pt	results/Bengalese_Finches/hidden_size/hidden_size_16/Bird7/results_210531_190257/train_dur_480s/replicate_8/StandardizeSpect	0.02	1.757459862899069	Bird7	5	hidden_size	16	Bengalese Finch	without
714	min_segment_dur_majority_vote	0.9843386564748772	0.2	0.8988611580597621	0.36455198259801	480	9	TweetyNet	results/Bengalese_Finches/hidden_size/hidden_size_16/Bird7/results_210531_190257	results/Bengalese_Finches/hidden_size/hidden_size_16/Bird7/results_210531_190257/config_BirdsongRecognition_bird07.toml	data/BirdsongRecognition/Bird7/Wave_prep_210527_213331.csv	results/Bengalese_Finches/hidden_size/hidden_size_16/Bird7/results_210531_190257/train_dur_480s/replicate_9/TweetyNet/checkpoints/max-val-acc-checkpoint.pt	results/Bengalese_Finches/hidden_size/hidden_size_16/Bird7/results_210531_190257/train_dur_480s/replicate_9/StandardizeSpect	0.02	1.5661343525122828	Bird7	5	hidden_size	16	Bengalese Finch	with
715	none	0.9824104529810688	6.714285714285714	0.801388792097438	10.9108936920867	480	9	TweetyNet	results/Bengalese_Finches/hidden_size/hidden_size_16/Bird7/results_210531_190257	results/Bengalese_Finches/hidden_size/hidden_size_16/Bird7/results_210531_190257/config_BirdsongRecognition_bird07.toml	data/BirdsongRecognition/Bird7/Wave_prep_210527_213331.csv	results/Bengalese_Finches/hidden_size/hidden_size_16/Bird7/results_210531_190257/train_dur_480s/replicate_9/TweetyNet/checkpoints/max-val-acc-checkpoint.pt	results/Bengalese_Finches/hidden_size/hidden_size_16/Bird7/results_210531_190257/train_dur_480s/replicate_9/StandardizeSpect	0.02	1.758954701893134	Bird7	5	hidden_size	16	Bengalese Finch	without
718	min_segment_dur_majority_vote	0.9841626044525408	0.2	0.897970354775836	0.34737467081009	480	10	TweetyNet	results/Bengalese_Finches/hidden_size/hidden_size_16/Bird7/results_210531_190257	results/Bengalese_Finches/hidden_size/hidden_size_16/Bird7/results_210531_190257/config_BirdsongRecognition_bird07.toml	data/BirdsongRecognition/Bird7/Wave_prep_210527_213331.csv	results/Bengalese_Finches/hidden_size/hidden_size_16/Bird7/results_210531_190257/train_dur_480s/replicate_10/TweetyNet/checkpoints/max-val-acc-checkpoint.pt	results/Bengalese_Finches/hidden_size/hidden_size_16/Bird7/results_210531_190257/train_dur_480s/replicate_10/StandardizeSpect	0.02	1.583739554745911	Bird7	5	hidden_size	16	Bengalese Finch	with
719	none	0.9814150403214086	7.142857142857143	0.7818982218841852	11.79656338601674	480	10	TweetyNet	results/Bengalese_Finches/hidden_size/hidden_size_16/Bird7/results_210531_190257	results/Bengalese_Finches/hidden_size/hidden_size_16/Bird7/results_210531_190257/config_BirdsongRecognition_bird07.toml	data/BirdsongRecognition/Bird7/Wave_prep_210527_213331.csv	results/Bengalese_Finches/hidden_size/hidden_size_16/Bird7/results_210531_190257/train_dur_480s/replicate_10/TweetyNet/checkpoints/max-val-acc-checkpoint.pt	results/Bengalese_Finches/hidden_size/hidden_size_16/Bird7/results_210531_190257/train_dur_480s/replicate_10/StandardizeSpect	0.02	1.8584959678591413	Bird7	5	hidden_size	16	Bengalese Finch	without
722	min_segment_dur_majority_vote	0.9789841935968036	0.6285714285714286	0.8413145223333938	1.10370370736103	30	1	TweetyNet	results/Bengalese_Finches/hidden_size/hidden_size_16/Bird7/results_210531_190257	results/Bengalese_Finches/hidden_size/hidden_size_16/Bird7/results_210531_190257/config_BirdsongRecognition_bird07.toml	data/BirdsongRecognition/Bird7/Wave_prep_210527_213331.csv	results/Bengalese_Finches/hidden_size/hidden_size_16/Bird7/results_210531_190257/train_dur_30s/replicate_1/TweetyNet/checkpoints/max-val-acc-checkpoint.pt	results/Bengalese_Finches/hidden_size/hidden_size_16/Bird7/results_210531_190257/train_dur_30s/replicate_1/StandardizeSpect	0.02	2.1015806403196446	Bird7	0	hidden_size	16	Bengalese Finch	with
723	none	0.9739444266011986	17.65714285714286	0.6908383240275501	28.76237777854818	30	1	TweetyNet	results/Bengalese_Finches/hidden_size/hidden_size_16/Bird7/results_210531_190257	results/Bengalese_Finches/hidden_size/hidden_size_16/Bird7/results_210531_190257/config_BirdsongRecognition_bird07.toml	data/BirdsongRecognition/Bird7/Wave_prep_210527_213331.csv	results/Bengalese_Finches/hidden_size/hidden_size_16/Bird7/results_210531_190257/train_dur_30s/replicate_1/TweetyNet/checkpoints/max-val-acc-checkpoint.pt	results/Bengalese_Finches/hidden_size/hidden_size_16/Bird7/results_210531_190257/train_dur_30s/replicate_1/StandardizeSpect	0.02	2.605557339880138	Bird7	0	hidden_size	16	Bengalese Finch	without
726	min_segment_dur_majority_vote	0.9774859163792828	0.9142857142857144	0.8019645912004484	1.5043428163584	30	2	TweetyNet	results/Bengalese_Finches/hidden_size/hidden_size_16/Bird7/results_210531_190257	results/Bengalese_Finches/hidden_size/hidden_size_16/Bird7/results_210531_190257/config_BirdsongRecognition_bird07.toml	data/BirdsongRecognition/Bird7/Wave_prep_210527_213331.csv	results/Bengalese_Finches/hidden_size/hidden_size_16/Bird7/results_210531_190257/train_dur_30s/replicate_2/TweetyNet/checkpoints/max-val-acc-checkpoint.pt	results/Bengalese_Finches/hidden_size/hidden_size_16/Bird7/results_210531_190257/train_dur_30s/replicate_2/StandardizeSpect	0.02	2.251408362071728	Bird7	0	hidden_size	16	Bengalese Finch	with
727	none	0.9714493577110976	19.485714285714284	0.638730236617143	30.851476058536708	30	2	TweetyNet	results/Bengalese_Finches/hidden_size/hidden_size_16/Bird7/results_210531_190257	results/Bengalese_Finches/hidden_size/hidden_size_16/Bird7/results_210531_190257/config_BirdsongRecognition_bird07.toml	data/BirdsongRecognition/Bird7/Wave_prep_210527_213331.csv	results/Bengalese_Finches/hidden_size/hidden_size_16/Bird7/results_210531_190257/train_dur_30s/replicate_2/TweetyNet/checkpoints/max-val-acc-checkpoint.pt	results/Bengalese_Finches/hidden_size/hidden_size_16/Bird7/results_210531_190257/train_dur_30s/replicate_2/StandardizeSpect	0.02	2.8550642288902472	Bird7	0	hidden_size	16	Bengalese Finch	without
730	min_segment_dur_majority_vote	0.9781000369998236	0.8571428571428571	0.8010320005545063	1.47759554097897	30	3	TweetyNet	results/Bengalese_Finches/hidden_size/hidden_size_16/Bird7/results_210531_190257	results/Bengalese_Finches/hidden_size/hidden_size_16/Bird7/results_210531_190257/config_BirdsongRecognition_bird07.toml	data/BirdsongRecognition/Bird7/Wave_prep_210527_213331.csv	results/Bengalese_Finches/hidden_size/hidden_size_16/Bird7/results_210531_190257/train_dur_30s/replicate_3/TweetyNet/checkpoints/max-val-acc-checkpoint.pt	results/Bengalese_Finches/hidden_size/hidden_size_16/Bird7/results_210531_190257/train_dur_30s/replicate_3/StandardizeSpect	0.02	2.189996300017649	Bird7	0	hidden_size	16	Bengalese Finch	with
731	none	0.972460001595526	22.142857142857142	0.6270704746767446	35.54183805212074	30	3	TweetyNet	results/Bengalese_Finches/hidden_size/hidden_size_16/Bird7/results_210531_190257	results/Bengalese_Finches/hidden_size/hidden_size_16/Bird7/results_210531_190257/config_BirdsongRecognition_bird07.toml	data/BirdsongRecognition/Bird7/Wave_prep_210527_213331.csv	results/Bengalese_Finches/hidden_size/hidden_size_16/Bird7/results_210531_190257/train_dur_30s/replicate_3/TweetyNet/checkpoints/max-val-acc-checkpoint.pt	results/Bengalese_Finches/hidden_size/hidden_size_16/Bird7/results_210531_190257/train_dur_30s/replicate_3/StandardizeSpect	0.02	2.7539998404473964	Bird7	0	hidden_size	16	Bengalese Finch	without
734	min_segment_dur_majority_vote	0.9778407033550672	0.9142857142857144	0.7971272724949553	1.49500566133954	30	4	TweetyNet	results/Bengalese_Finches/hidden_size/hidden_size_16/Bird7/results_210531_190257	results/Bengalese_Finches/hidden_size/hidden_size_16/Bird7/results_210531_190257/config_BirdsongRecognition_bird07.toml	data/BirdsongRecognition/Bird7/Wave_prep_210527_213331.csv	results/Bengalese_Finches/hidden_size/hidden_size_16/Bird7/results_210531_190257/train_dur_30s/replicate_4/TweetyNet/checkpoints/max-val-acc-checkpoint.pt	results/Bengalese_Finches/hidden_size/hidden_size_16/Bird7/results_210531_190257/train_dur_30s/replicate_4/StandardizeSpect	0.02	2.215929664493277	Bird7	0	hidden_size	16	Bengalese Finch	with
735	none	0.9716381951055744	22.34285714285714	0.6206092254322043	35.46471082474722	30	4	TweetyNet	results/Bengalese_Finches/hidden_size/hidden_size_16/Bird7/results_210531_190257	results/Bengalese_Finches/hidden_size/hidden_size_16/Bird7/results_210531_190257/config_BirdsongRecognition_bird07.toml	data/BirdsongRecognition/Bird7/Wave_prep_210527_213331.csv	results/Bengalese_Finches/hidden_size/hidden_size_16/Bird7/results_210531_190257/train_dur_30s/replicate_4/TweetyNet/checkpoints/max-val-acc-checkpoint.pt	results/Bengalese_Finches/hidden_size/hidden_size_16/Bird7/results_210531_190257/train_dur_30s/replicate_4/StandardizeSpect	0.02	2.8361804894425635	Bird7	0	hidden_size	16	Bengalese Finch	without
738	min_segment_dur_majority_vote	0.9786396703543682	0.6571428571428571	0.8316873285594151	0.99026895071343	30	5	TweetyNet	results/Bengalese_Finches/hidden_size/hidden_size_16/Bird7/results_210531_190257	results/Bengalese_Finches/hidden_size/hidden_size_16/Bird7/results_210531_190257/config_BirdsongRecognition_bird07.toml	data/BirdsongRecognition/Bird7/Wave_prep_210527_213331.csv	results/Bengalese_Finches/hidden_size/hidden_size_16/Bird7/results_210531_190257/train_dur_30s/replicate_5/TweetyNet/checkpoints/max-val-acc-checkpoint.pt	results/Bengalese_Finches/hidden_size/hidden_size_16/Bird7/results_210531_190257/train_dur_30s/replicate_5/StandardizeSpect	0.02	2.136032964563184	Bird7	0	hidden_size	16	Bengalese Finch	with
739	none	0.9729969994679576	18.62857142857143	0.6618563585968243	30.0219165825132	30	5	TweetyNet	results/Bengalese_Finches/hidden_size/hidden_size_16/Bird7/results_210531_190257	results/Bengalese_Finches/hidden_size/hidden_size_16/Bird7/results_210531_190257/config_BirdsongRecognition_bird07.toml	data/BirdsongRecognition/Bird7/Wave_prep_210527_213331.csv	results/Bengalese_Finches/hidden_size/hidden_size_16/Bird7/results_210531_190257/train_dur_30s/replicate_5/TweetyNet/checkpoints/max-val-acc-checkpoint.pt	results/Bengalese_Finches/hidden_size/hidden_size_16/Bird7/results_210531_190257/train_dur_30s/replicate_5/StandardizeSpect	0.02	2.700300053204252	Bird7	0	hidden_size	16	Bengalese Finch	without
742	min_segment_dur_majority_vote	0.980596129215375	0.4857142857142857	0.8430910716338634	0.82639472589171	30	6	TweetyNet	results/Bengalese_Finches/hidden_size/hidden_size_16/Bird7/results_210531_190257	results/Bengalese_Finches/hidden_size/hidden_size_16/Bird7/results_210531_190257/config_BirdsongRecognition_bird07.toml	data/BirdsongRecognition/Bird7/Wave_prep_210527_213331.csv	results/Bengalese_Finches/hidden_size/hidden_size_16/Bird7/results_210531_190257/train_dur_30s/replicate_6/TweetyNet/checkpoints/max-val-acc-checkpoint.pt	results/Bengalese_Finches/hidden_size/hidden_size_16/Bird7/results_210531_190257/train_dur_30s/replicate_6/StandardizeSpect	0.02	1.940387078462502	Bird7	0	hidden_size	16	Bengalese Finch	with
743	none	0.9766181467263124	12.571428571428571	0.7020425157646771	19.92171272909068	30	6	TweetyNet	results/Bengalese_Finches/hidden_size/hidden_size_16/Bird7/results_210531_190257	results/Bengalese_Finches/hidden_size/hidden_size_16/Bird7/results_210531_190257/config_BirdsongRecognition_bird07.toml	data/BirdsongRecognition/Bird7/Wave_prep_210527_213331.csv	results/Bengalese_Finches/hidden_size/hidden_size_16/Bird7/results_210531_190257/train_dur_30s/replicate_6/TweetyNet/checkpoints/max-val-acc-checkpoint.pt	results/Bengalese_Finches/hidden_size/hidden_size_16/Bird7/results_210531_190257/train_dur_30s/replicate_6/StandardizeSpect	0.02	2.338185327368747	Bird7	0	hidden_size	16	Bengalese Finch	without
746	min_segment_dur_majority_vote	0.9773557726250192	0.6571428571428571	0.8050227516636563	1.1719875523136298	30	7	TweetyNet	results/Bengalese_Finches/hidden_size/hidden_size_16/Bird7/results_210531_190257	results/Bengalese_Finches/hidden_size/hidden_size_16/Bird7/results_210531_190257/config_BirdsongRecognition_bird07.toml	data/BirdsongRecognition/Bird7/Wave_prep_210527_213331.csv	results/Bengalese_Finches/hidden_size/hidden_size_16/Bird7/results_210531_190257/train_dur_30s/replicate_7/TweetyNet/checkpoints/max-val-acc-checkpoint.pt	results/Bengalese_Finches/hidden_size/hidden_size_16/Bird7/results_210531_190257/train_dur_30s/replicate_7/StandardizeSpect	0.02	2.264422737498073	Bird7	0	hidden_size	16	Bengalese Finch	with
747	none	0.9722366147002832	19.685714285714287	0.6583115834507783	31.26695674250632	30	7	TweetyNet	results/Bengalese_Finches/hidden_size/hidden_size_16/Bird7/results_210531_190257	results/Bengalese_Finches/hidden_size/hidden_size_16/Bird7/results_210531_190257/config_BirdsongRecognition_bird07.toml	data/BirdsongRecognition/Bird7/Wave_prep_210527_213331.csv	results/Bengalese_Finches/hidden_size/hidden_size_16/Bird7/results_210531_190257/train_dur_30s/replicate_7/TweetyNet/checkpoints/max-val-acc-checkpoint.pt	results/Bengalese_Finches/hidden_size/hidden_size_16/Bird7/results_210531_190257/train_dur_30s/replicate_7/StandardizeSpect	0.02	2.776338529971678	Bird7	0	hidden_size	16	Bengalese Finch	without
750	min_segment_dur_majority_vote	0.9767382555125604	0.7142857142857143	0.7881320639991921	1.1948954542781	30	8	TweetyNet	results/Bengalese_Finches/hidden_size/hidden_size_16/Bird7/results_210531_190257	results/Bengalese_Finches/hidden_size/hidden_size_16/Bird7/results_210531_190257/config_BirdsongRecognition_bird07.toml	data/BirdsongRecognition/Bird7/Wave_prep_210527_213331.csv	results/Bengalese_Finches/hidden_size/hidden_size_16/Bird7/results_210531_190257/train_dur_30s/replicate_8/TweetyNet/checkpoints/max-val-acc-checkpoint.pt	results/Bengalese_Finches/hidden_size/hidden_size_16/Bird7/results_210531_190257/train_dur_30s/replicate_8/StandardizeSpect	0.02	2.326174448743945	Bird7	0	hidden_size	16	Bengalese Finch	with
751	none	0.9700689371011068	22.085714285714285	0.617838006846895	34.028865453011456	30	8	TweetyNet	results/Bengalese_Finches/hidden_size/hidden_size_16/Bird7/results_210531_190257	results/Bengalese_Finches/hidden_size/hidden_size_16/Bird7/results_210531_190257/config_BirdsongRecognition_bird07.toml	data/BirdsongRecognition/Bird7/Wave_prep_210527_213331.csv	results/Bengalese_Finches/hidden_size/hidden_size_16/Bird7/results_210531_190257/train_dur_30s/replicate_8/TweetyNet/checkpoints/max-val-acc-checkpoint.pt	results/Bengalese_Finches/hidden_size/hidden_size_16/Bird7/results_210531_190257/train_dur_30s/replicate_8/StandardizeSpect	0.02	2.9931062898893246	Bird7	0	hidden_size	16	Bengalese Finch	without
754	min_segment_dur_majority_vote	0.9729091102514849	1.7714285714285714	0.6797761084034105	2.88204131300143	30	9	TweetyNet	results/Bengalese_Finches/hidden_size/hidden_size_16/Bird7/results_210531_190257	results/Bengalese_Finches/hidden_size/hidden_size_16/Bird7/results_210531_190257/config_BirdsongRecognition_bird07.toml	data/BirdsongRecognition/Bird7/Wave_prep_210527_213331.csv	results/Bengalese_Finches/hidden_size/hidden_size_16/Bird7/results_210531_190257/train_dur_30s/replicate_9/TweetyNet/checkpoints/max-val-acc-checkpoint.pt	results/Bengalese_Finches/hidden_size/hidden_size_16/Bird7/results_210531_190257/train_dur_30s/replicate_9/StandardizeSpect	0.02	2.7090889748515257	Bird7	0	hidden_size	16	Bengalese Finch	with
755	none	0.9629057438323604	34.542857142857144	0.4948668272400782	54.85792538064024	30	9	TweetyNet	results/Bengalese_Finches/hidden_size/hidden_size_16/Bird7/results_210531_190257	results/Bengalese_Finches/hidden_size/hidden_size_16/Bird7/results_210531_190257/config_BirdsongRecognition_bird07.toml	data/BirdsongRecognition/Bird7/Wave_prep_210527_213331.csv	results/Bengalese_Finches/hidden_size/hidden_size_16/Bird7/results_210531_190257/train_dur_30s/replicate_9/TweetyNet/checkpoints/max-val-acc-checkpoint.pt	results/Bengalese_Finches/hidden_size/hidden_size_16/Bird7/results_210531_190257/train_dur_30s/replicate_9/StandardizeSpect	0.02	3.7094256167639728	Bird7	0	hidden_size	16	Bengalese Finch	without
758	min_segment_dur_majority_vote	0.978252696167642	0.4857142857142857	0.845576524687458	0.73103078991464	30	10	TweetyNet	results/Bengalese_Finches/hidden_size/hidden_size_16/Bird7/results_210531_190257	results/Bengalese_Finches/hidden_size/hidden_size_16/Bird7/results_210531_190257/config_BirdsongRecognition_bird07.toml	data/BirdsongRecognition/Bird7/Wave_prep_210527_213331.csv	results/Bengalese_Finches/hidden_size/hidden_size_16/Bird7/results_210531_190257/train_dur_30s/replicate_10/TweetyNet/checkpoints/max-val-acc-checkpoint.pt	results/Bengalese_Finches/hidden_size/hidden_size_16/Bird7/results_210531_190257/train_dur_30s/replicate_10/StandardizeSpect	0.02	2.174730383235812	Bird7	0	hidden_size	16	Bengalese Finch	with
759	none	0.9736570434428	15.228571428571428	0.6965664879102353	24.1236546317073	30	10	TweetyNet	results/Bengalese_Finches/hidden_size/hidden_size_16/Bird7/results_210531_190257	results/Bengalese_Finches/hidden_size/hidden_size_16/Bird7/results_210531_190257/config_BirdsongRecognition_bird07.toml	data/BirdsongRecognition/Bird7/Wave_prep_210527_213331.csv	results/Bengalese_Finches/hidden_size/hidden_size_16/Bird7/results_210531_190257/train_dur_30s/replicate_10/TweetyNet/checkpoints/max-val-acc-checkpoint.pt	results/Bengalese_Finches/hidden_size/hidden_size_16/Bird7/results_210531_190257/train_dur_30s/replicate_10/StandardizeSpect	0.02	2.634295655720009	Bird7	0	hidden_size	16	Bengalese Finch	without
762	min_segment_dur_majority_vote	0.9838082399156386	0.2285714285714285	0.9080204828385494	0.50845979417407	180	1	TweetyNet	results/Bengalese_Finches/hidden_size/hidden_size_16/Bird7/results_210531_190257	results/Bengalese_Finches/hidden_size/hidden_size_16/Bird7/results_210531_190257/config_BirdsongRecognition_bird07.toml	data/BirdsongRecognition/Bird7/Wave_prep_210527_213331.csv	results/Bengalese_Finches/hidden_size/hidden_size_16/Bird7/results_210531_190257/train_dur_180s/replicate_1/TweetyNet/checkpoints/max-val-acc-checkpoint.pt	results/Bengalese_Finches/hidden_size/hidden_size_16/Bird7/results_210531_190257/train_dur_180s/replicate_1/StandardizeSpect	0.02	1.6191760084361406	Bird7	4	hidden_size	16	Bengalese Finch	with
763	none	0.981035145883136	8.82857142857143	0.7721844403805888	14.078323619145868	180	1	TweetyNet	results/Bengalese_Finches/hidden_size/hidden_size_16/Bird7/results_210531_190257	results/Bengalese_Finches/hidden_size/hidden_size_16/Bird7/results_210531_190257/config_BirdsongRecognition_bird07.toml	data/BirdsongRecognition/Bird7/Wave_prep_210527_213331.csv	results/Bengalese_Finches/hidden_size/hidden_size_16/Bird7/results_210531_190257/train_dur_180s/replicate_1/TweetyNet/checkpoints/max-val-acc-checkpoint.pt	results/Bengalese_Finches/hidden_size/hidden_size_16/Bird7/results_210531_190257/train_dur_180s/replicate_1/StandardizeSpect	0.02	1.8964854116863883	Bird7	4	hidden_size	16	Bengalese Finch	without
766	min_segment_dur_majority_vote	0.9819937829364512	0.4571428571428571	0.867323004312476	0.8855540289345799	180	2	TweetyNet	results/Bengalese_Finches/hidden_size/hidden_size_16/Bird7/results_210531_190257	results/Bengalese_Finches/hidden_size/hidden_size_16/Bird7/results_210531_190257/config_BirdsongRecognition_bird07.toml	data/BirdsongRecognition/Bird7/Wave_prep_210527_213331.csv	results/Bengalese_Finches/hidden_size/hidden_size_16/Bird7/results_210531_190257/train_dur_180s/replicate_2/TweetyNet/checkpoints/max-val-acc-checkpoint.pt	results/Bengalese_Finches/hidden_size/hidden_size_16/Bird7/results_210531_190257/train_dur_180s/replicate_2/StandardizeSpect	0.02	1.8006217063548655	Bird7	4	hidden_size	16	Bengalese Finch	with
767	none	0.9794810974924418	8.6	0.7581373609392326	13.782679001008342	180	2	TweetyNet	results/Bengalese_Finches/hidden_size/hidden_size_16/Bird7/results_210531_190257	results/Bengalese_Finches/hidden_size/hidden_size_16/Bird7/results_210531_190257/config_BirdsongRecognition_bird07.toml	data/BirdsongRecognition/Bird7/Wave_prep_210527_213331.csv	results/Bengalese_Finches/hidden_size/hidden_size_16/Bird7/results_210531_190257/train_dur_180s/replicate_2/TweetyNet/checkpoints/max-val-acc-checkpoint.pt	results/Bengalese_Finches/hidden_size/hidden_size_16/Bird7/results_210531_190257/train_dur_180s/replicate_2/StandardizeSpect	0.02	2.0518902507558168	Bird7	4	hidden_size	16	Bengalese Finch	without
770	min_segment_dur_majority_vote	0.9824314067703394	0.4	0.8596302540687931	0.62158810728907	180	3	TweetyNet	results/Bengalese_Finches/hidden_size/hidden_size_16/Bird7/results_210531_190257	results/Bengalese_Finches/hidden_size/hidden_size_16/Bird7/results_210531_190257/config_BirdsongRecognition_bird07.toml	data/BirdsongRecognition/Bird7/Wave_prep_210527_213331.csv	results/Bengalese_Finches/hidden_size/hidden_size_16/Bird7/results_210531_190257/train_dur_180s/replicate_3/TweetyNet/checkpoints/max-val-acc-checkpoint.pt	results/Bengalese_Finches/hidden_size/hidden_size_16/Bird7/results_210531_190257/train_dur_180s/replicate_3/StandardizeSpect	0.02	1.7568593229660645	Bird7	4	hidden_size	16	Bengalese Finch	with
771	none	0.980011986457197	9.657142857142857	0.7475832495106928	15.20383018371578	180	3	TweetyNet	results/Bengalese_Finches/hidden_size/hidden_size_16/Bird7/results_210531_190257	results/Bengalese_Finches/hidden_size/hidden_size_16/Bird7/results_210531_190257/config_BirdsongRecognition_bird07.toml	data/BirdsongRecognition/Bird7/Wave_prep_210527_213331.csv	results/Bengalese_Finches/hidden_size/hidden_size_16/Bird7/results_210531_190257/train_dur_180s/replicate_3/TweetyNet/checkpoints/max-val-acc-checkpoint.pt	results/Bengalese_Finches/hidden_size/hidden_size_16/Bird7/results_210531_190257/train_dur_180s/replicate_3/StandardizeSpect	0.02	1.9988013542803	Bird7	4	hidden_size	16	Bengalese Finch	without
774	min_segment_dur_majority_vote	0.9823413220849302	0.4285714285714285	0.8629084614768564	0.73918506745977	180	4	TweetyNet	results/Bengalese_Finches/hidden_size/hidden_size_16/Bird7/results_210531_190257	results/Bengalese_Finches/hidden_size/hidden_size_16/Bird7/results_210531_190257/config_BirdsongRecognition_bird07.toml	data/BirdsongRecognition/Bird7/Wave_prep_210527_213331.csv	results/Bengalese_Finches/hidden_size/hidden_size_16/Bird7/results_210531_190257/train_dur_180s/replicate_4/TweetyNet/checkpoints/max-val-acc-checkpoint.pt	results/Bengalese_Finches/hidden_size/hidden_size_16/Bird7/results_210531_190257/train_dur_180s/replicate_4/StandardizeSpect	0.02	1.765867791506981	Bird7	4	hidden_size	16	Bengalese Finch	with
775	none	0.9793790308068832	10.771428571428572	0.7442817101539967	16.869561744527818	180	4	TweetyNet	results/Bengalese_Finches/hidden_size/hidden_size_16/Bird7/results_210531_190257	results/Bengalese_Finches/hidden_size/hidden_size_16/Bird7/results_210531_190257/config_BirdsongRecognition_bird07.toml	data/BirdsongRecognition/Bird7/Wave_prep_210527_213331.csv	results/Bengalese_Finches/hidden_size/hidden_size_16/Bird7/results_210531_190257/train_dur_180s/replicate_4/TweetyNet/checkpoints/max-val-acc-checkpoint.pt	results/Bengalese_Finches/hidden_size/hidden_size_16/Bird7/results_210531_190257/train_dur_180s/replicate_4/StandardizeSpect	0.02	2.0620969193116845	Bird7	4	hidden_size	16	Bengalese Finch	without
778	min_segment_dur_majority_vote	0.9837556286947992	0.2285714285714285	0.9068089287929294	0.3953368607495899	180	5	TweetyNet	results/Bengalese_Finches/hidden_size/hidden_size_16/Bird7/results_210531_190257	results/Bengalese_Finches/hidden_size/hidden_size_16/Bird7/results_210531_190257/config_BirdsongRecognition_bird07.toml	data/BirdsongRecognition/Bird7/Wave_prep_210527_213331.csv	results/Bengalese_Finches/hidden_size/hidden_size_16/Bird7/results_210531_190257/train_dur_180s/replicate_5/TweetyNet/checkpoints/max-val-acc-checkpoint.pt	results/Bengalese_Finches/hidden_size/hidden_size_16/Bird7/results_210531_190257/train_dur_180s/replicate_5/StandardizeSpect	0.02	1.624437130520073	Bird7	4	hidden_size	16	Bengalese Finch	with
779	none	0.9805989416993576	9.285714285714286	0.7629190711321313	14.67338965265663	180	5	TweetyNet	results/Bengalese_Finches/hidden_size/hidden_size_16/Bird7/results_210531_190257	results/Bengalese_Finches/hidden_size/hidden_size_16/Bird7/results_210531_190257/config_BirdsongRecognition_bird07.toml	data/BirdsongRecognition/Bird7/Wave_prep_210527_213331.csv	results/Bengalese_Finches/hidden_size/hidden_size_16/Bird7/results_210531_190257/train_dur_180s/replicate_5/TweetyNet/checkpoints/max-val-acc-checkpoint.pt	results/Bengalese_Finches/hidden_size/hidden_size_16/Bird7/results_210531_190257/train_dur_180s/replicate_5/StandardizeSpect	0.02	1.9401058300642315	Bird7	4	hidden_size	16	Bengalese Finch	without
782	min_segment_dur_majority_vote	0.9831654277262984	0.3142857142857143	0.87665050004476	0.60094294127907	180	6	TweetyNet	results/Bengalese_Finches/hidden_size/hidden_size_16/Bird7/results_210531_190257	results/Bengalese_Finches/hidden_size/hidden_size_16/Bird7/results_210531_190257/config_BirdsongRecognition_bird07.toml	data/BirdsongRecognition/Bird7/Wave_prep_210527_213331.csv	results/Bengalese_Finches/hidden_size/hidden_size_16/Bird7/results_210531_190257/train_dur_180s/replicate_6/TweetyNet/checkpoints/max-val-acc-checkpoint.pt	results/Bengalese_Finches/hidden_size/hidden_size_16/Bird7/results_210531_190257/train_dur_180s/replicate_6/StandardizeSpect	0.02	1.6834572273701554	Bird7	4	hidden_size	16	Bengalese Finch	with
783	none	0.979565530534526	10.2	0.7369214013304716	16.4945322867115	180	6	TweetyNet	results/Bengalese_Finches/hidden_size/hidden_size_16/Bird7/results_210531_190257	results/Bengalese_Finches/hidden_size/hidden_size_16/Bird7/results_210531_190257/config_BirdsongRecognition_bird07.toml	data/BirdsongRecognition/Bird7/Wave_prep_210527_213331.csv	results/Bengalese_Finches/hidden_size/hidden_size_16/Bird7/results_210531_190257/train_dur_180s/replicate_6/TweetyNet/checkpoints/max-val-acc-checkpoint.pt	results/Bengalese_Finches/hidden_size/hidden_size_16/Bird7/results_210531_190257/train_dur_180s/replicate_6/StandardizeSpect	0.02	2.0434469465474003	Bird7	4	hidden_size	16	Bengalese Finch	without
786	min_segment_dur_majority_vote	0.983483347945778	0.3714285714285714	0.8705718617493551	0.6422425672768	180	7	TweetyNet	results/Bengalese_Finches/hidden_size/hidden_size_16/Bird7/results_210531_190257	results/Bengalese_Finches/hidden_size/hidden_size_16/Bird7/results_210531_190257/config_BirdsongRecognition_bird07.toml	data/BirdsongRecognition/Bird7/Wave_prep_210527_213331.csv	results/Bengalese_Finches/hidden_size/hidden_size_16/Bird7/results_210531_190257/train_dur_180s/replicate_7/TweetyNet/checkpoints/max-val-acc-checkpoint.pt	results/Bengalese_Finches/hidden_size/hidden_size_16/Bird7/results_210531_190257/train_dur_180s/replicate_7/StandardizeSpect	0.02	1.6516652054221923	Bird7	4	hidden_size	16	Bengalese Finch	with
787	none	0.9814478479372888	6.6	0.7694794348596018	10.802192460434371	180	7	TweetyNet	results/Bengalese_Finches/hidden_size/hidden_size_16/Bird7/results_210531_190257	results/Bengalese_Finches/hidden_size/hidden_size_16/Bird7/results_210531_190257/config_BirdsongRecognition_bird07.toml	data/BirdsongRecognition/Bird7/Wave_prep_210527_213331.csv	results/Bengalese_Finches/hidden_size/hidden_size_16/Bird7/results_210531_190257/train_dur_180s/replicate_7/TweetyNet/checkpoints/max-val-acc-checkpoint.pt	results/Bengalese_Finches/hidden_size/hidden_size_16/Bird7/results_210531_190257/train_dur_180s/replicate_7/StandardizeSpect	0.02	1.8552152062711325	Bird7	4	hidden_size	16	Bengalese Finch	without
790	min_segment_dur_majority_vote	0.9827963554469262	0.3428571428571428	0.8777497503239224	0.63263430573855	180	8	TweetyNet	results/Bengalese_Finches/hidden_size/hidden_size_16/Bird7/results_210531_190257	results/Bengalese_Finches/hidden_size/hidden_size_16/Bird7/results_210531_190257/config_BirdsongRecognition_bird07.toml	data/BirdsongRecognition/Bird7/Wave_prep_210527_213331.csv	results/Bengalese_Finches/hidden_size/hidden_size_16/Bird7/results_210531_190257/train_dur_180s/replicate_8/TweetyNet/checkpoints/max-val-acc-checkpoint.pt	results/Bengalese_Finches/hidden_size/hidden_size_16/Bird7/results_210531_190257/train_dur_180s/replicate_8/StandardizeSpect	0.02	1.7203644553073771	Bird7	4	hidden_size	16	Bengalese Finch	with
791	none	0.9801156879191674	8.428571428571429	0.7479468407778403	13.64050545822165	180	8	TweetyNet	results/Bengalese_Finches/hidden_size/hidden_size_16/Bird7/results_210531_190257	results/Bengalese_Finches/hidden_size/hidden_size_16/Bird7/results_210531_190257/config_BirdsongRecognition_bird07.toml	data/BirdsongRecognition/Bird7/Wave_prep_210527_213331.csv	results/Bengalese_Finches/hidden_size/hidden_size_16/Bird7/results_210531_190257/train_dur_180s/replicate_8/TweetyNet/checkpoints/max-val-acc-checkpoint.pt	results/Bengalese_Finches/hidden_size/hidden_size_16/Bird7/results_210531_190257/train_dur_180s/replicate_8/StandardizeSpect	0.02	1.988431208083264	Bird7	4	hidden_size	16	Bengalese Finch	without
794	min_segment_dur_majority_vote	0.9821017664627644	0.3428571428571428	0.8722003243834271	0.6794580500605201	180	9	TweetyNet	results/Bengalese_Finches/hidden_size/hidden_size_16/Bird7/results_210531_190257	results/Bengalese_Finches/hidden_size/hidden_size_16/Bird7/results_210531_190257/config_BirdsongRecognition_bird07.toml	data/BirdsongRecognition/Bird7/Wave_prep_210527_213331.csv	results/Bengalese_Finches/hidden_size/hidden_size_16/Bird7/results_210531_190257/train_dur_180s/replicate_9/TweetyNet/checkpoints/max-val-acc-checkpoint.pt	results/Bengalese_Finches/hidden_size/hidden_size_16/Bird7/results_210531_190257/train_dur_180s/replicate_9/StandardizeSpect	0.02	1.789823353723552	Bird7	4	hidden_size	16	Bengalese Finch	with
795	none	0.9785902100590028	10.571428571428571	0.7294272767245582	16.782893985533732	180	9	TweetyNet	results/Bengalese_Finches/hidden_size/hidden_size_16/Bird7/results_210531_190257	results/Bengalese_Finches/hidden_size/hidden_size_16/Bird7/results_210531_190257/config_BirdsongRecognition_bird07.toml	data/BirdsongRecognition/Bird7/Wave_prep_210527_213331.csv	results/Bengalese_Finches/hidden_size/hidden_size_16/Bird7/results_210531_190257/train_dur_180s/replicate_9/TweetyNet/checkpoints/max-val-acc-checkpoint.pt	results/Bengalese_Finches/hidden_size/hidden_size_16/Bird7/results_210531_190257/train_dur_180s/replicate_9/StandardizeSpect	0.02	2.140978994099718	Bird7	4	hidden_size	16	Bengalese Finch	without
798	min_segment_dur_majority_vote	0.98264161270288	0.4	0.8772710951563435	0.7323554394991499	180	10	TweetyNet	results/Bengalese_Finches/hidden_size/hidden_size_16/Bird7/results_210531_190257	results/Bengalese_Finches/hidden_size/hidden_size_16/Bird7/results_210531_190257/config_BirdsongRecognition_bird07.toml	data/BirdsongRecognition/Bird7/Wave_prep_210527_213331.csv	results/Bengalese_Finches/hidden_size/hidden_size_16/Bird7/results_210531_190257/train_dur_180s/replicate_10/TweetyNet/checkpoints/max-val-acc-checkpoint.pt	results/Bengalese_Finches/hidden_size/hidden_size_16/Bird7/results_210531_190257/train_dur_180s/replicate_10/StandardizeSpect	0.02	1.7358387297120137	Bird7	4	hidden_size	16	Bengalese Finch	with
799	none	0.9794525632846188	9.771428571428572	0.7470410277571283	15.35092862934128	180	10	TweetyNet	results/Bengalese_Finches/hidden_size/hidden_size_16/Bird7/results_210531_190257	results/Bengalese_Finches/hidden_size/hidden_size_16/Bird7/results_210531_190257/config_BirdsongRecognition_bird07.toml	data/BirdsongRecognition/Bird7/Wave_prep_210527_213331.csv	results/Bengalese_Finches/hidden_size/hidden_size_16/Bird7/results_210531_190257/train_dur_180s/replicate_10/TweetyNet/checkpoints/max-val-acc-checkpoint.pt	results/Bengalese_Finches/hidden_size/hidden_size_16/Bird7/results_210531_190257/train_dur_180s/replicate_10/StandardizeSpect	0.02	2.0547436715381173	Bird7	4	hidden_size	16	Bengalese Finch	without
802	min_segment_dur_majority_vote	0.97800648323158	0.9142857142857144	0.7790880065026524	1.67451745374719	45	1	TweetyNet	results/Bengalese_Finches/hidden_size/hidden_size_16/Bird7/results_210531_190257	results/Bengalese_Finches/hidden_size/hidden_size_16/Bird7/results_210531_190257/config_BirdsongRecognition_bird07.toml	data/BirdsongRecognition/Bird7/Wave_prep_210527_213331.csv	results/Bengalese_Finches/hidden_size/hidden_size_16/Bird7/results_210531_190257/train_dur_45s/replicate_1/TweetyNet/checkpoints/max-val-acc-checkpoint.pt	results/Bengalese_Finches/hidden_size/hidden_size_16/Bird7/results_210531_190257/train_dur_45s/replicate_1/StandardizeSpect	0.02	2.1993516768420096	Bird7	1	hidden_size	16	Bengalese Finch	with
803	none	0.9720016324214245	23.0	0.6158976238090467	37.184797738148	45	1	TweetyNet	results/Bengalese_Finches/hidden_size/hidden_size_16/Bird7/results_210531_190257	results/Bengalese_Finches/hidden_size/hidden_size_16/Bird7/results_210531_190257/config_BirdsongRecognition_bird07.toml	data/BirdsongRecognition/Bird7/Wave_prep_210527_213331.csv	results/Bengalese_Finches/hidden_size/hidden_size_16/Bird7/results_210531_190257/train_dur_45s/replicate_1/TweetyNet/checkpoints/max-val-acc-checkpoint.pt	results/Bengalese_Finches/hidden_size/hidden_size_16/Bird7/results_210531_190257/train_dur_45s/replicate_1/StandardizeSpect	0.02	2.7998367578575545	Bird7	1	hidden_size	16	Bengalese Finch	without
806	min_segment_dur_majority_vote	0.9789628428067514	0.5714285714285714	0.8138542197589995	1.1222797989993	45	2	TweetyNet	results/Bengalese_Finches/hidden_size/hidden_size_16/Bird7/results_210531_190257	results/Bengalese_Finches/hidden_size/hidden_size_16/Bird7/results_210531_190257/config_BirdsongRecognition_bird07.toml	data/BirdsongRecognition/Bird7/Wave_prep_210527_213331.csv	results/Bengalese_Finches/hidden_size/hidden_size_16/Bird7/results_210531_190257/train_dur_45s/replicate_2/TweetyNet/checkpoints/max-val-acc-checkpoint.pt	results/Bengalese_Finches/hidden_size/hidden_size_16/Bird7/results_210531_190257/train_dur_45s/replicate_2/StandardizeSpect	0.02	2.103715719324861	Bird7	1	hidden_size	16	Bengalese Finch	with
807	none	0.9731010002800462	21.457142857142856	0.6494920093998581	34.46008485602149	45	2	TweetyNet	results/Bengalese_Finches/hidden_size/hidden_size_16/Bird7/results_210531_190257	results/Bengalese_Finches/hidden_size/hidden_size_16/Bird7/results_210531_190257/config_BirdsongRecognition_bird07.toml	data/BirdsongRecognition/Bird7/Wave_prep_210527_213331.csv	results/Bengalese_Finches/hidden_size/hidden_size_16/Bird7/results_210531_190257/train_dur_45s/replicate_2/TweetyNet/checkpoints/max-val-acc-checkpoint.pt	results/Bengalese_Finches/hidden_size/hidden_size_16/Bird7/results_210531_190257/train_dur_45s/replicate_2/StandardizeSpect	0.02	2.68989997199538	Bird7	1	hidden_size	16	Bengalese Finch	without
810	min_segment_dur_majority_vote	0.9796510623089668	0.6285714285714286	0.8244043120657936	1.04616756954135	45	3	TweetyNet	results/Bengalese_Finches/hidden_size/hidden_size_16/Bird7/results_210531_190257	results/Bengalese_Finches/hidden_size/hidden_size_16/Bird7/results_210531_190257/config_BirdsongRecognition_bird07.toml	data/BirdsongRecognition/Bird7/Wave_prep_210527_213331.csv	results/Bengalese_Finches/hidden_size/hidden_size_16/Bird7/results_210531_190257/train_dur_45s/replicate_3/TweetyNet/checkpoints/max-val-acc-checkpoint.pt	results/Bengalese_Finches/hidden_size/hidden_size_16/Bird7/results_210531_190257/train_dur_45s/replicate_3/StandardizeSpect	0.02	2.0348937691033187	Bird7	1	hidden_size	16	Bengalese Finch	with
811	none	0.9740446830333396	20.742857142857144	0.6471884033923364	33.917907516586894	45	3	TweetyNet	results/Bengalese_Finches/hidden_size/hidden_size_16/Bird7/results_210531_190257	results/Bengalese_Finches/hidden_size/hidden_size_16/Bird7/results_210531_190257/config_BirdsongRecognition_bird07.toml	data/BirdsongRecognition/Bird7/Wave_prep_210527_213331.csv	results/Bengalese_Finches/hidden_size/hidden_size_16/Bird7/results_210531_190257/train_dur_45s/replicate_3/TweetyNet/checkpoints/max-val-acc-checkpoint.pt	results/Bengalese_Finches/hidden_size/hidden_size_16/Bird7/results_210531_190257/train_dur_45s/replicate_3/StandardizeSpect	0.02	2.595531696666032	Bird7	1	hidden_size	16	Bengalese Finch	without
814	min_segment_dur_majority_vote	0.97887870149965	0.6285714285714286	0.8168221565566868	1.10064450770118	45	4	TweetyNet	results/Bengalese_Finches/hidden_size/hidden_size_16/Bird7/results_210531_190257	results/Bengalese_Finches/hidden_size/hidden_size_16/Bird7/results_210531_190257/config_BirdsongRecognition_bird07.toml	data/BirdsongRecognition/Bird7/Wave_prep_210527_213331.csv	results/Bengalese_Finches/hidden_size/hidden_size_16/Bird7/results_210531_190257/train_dur_45s/replicate_4/TweetyNet/checkpoints/max-val-acc-checkpoint.pt	results/Bengalese_Finches/hidden_size/hidden_size_16/Bird7/results_210531_190257/train_dur_45s/replicate_4/StandardizeSpect	0.02	2.112129850034994	Bird7	1	hidden_size	16	Bengalese Finch	with
815	none	0.9743416303985972	16.0	0.671637917934663	25.968366631271373	45	4	TweetyNet	results/Bengalese_Finches/hidden_size/hidden_size_16/Bird7/results_210531_190257	results/Bengalese_Finches/hidden_size/hidden_size_16/Bird7/results_210531_190257/config_BirdsongRecognition_bird07.toml	data/BirdsongRecognition/Bird7/Wave_prep_210527_213331.csv	results/Bengalese_Finches/hidden_size/hidden_size_16/Bird7/results_210531_190257/train_dur_45s/replicate_4/TweetyNet/checkpoints/max-val-acc-checkpoint.pt	results/Bengalese_Finches/hidden_size/hidden_size_16/Bird7/results_210531_190257/train_dur_45s/replicate_4/StandardizeSpect	0.02	2.5658369601402664	Bird7	1	hidden_size	16	Bengalese Finch	without
818	min_segment_dur_majority_vote	0.9788783084052262	0.6	0.8268894465438442	0.95737471191183	45	5	TweetyNet	results/Bengalese_Finches/hidden_size/hidden_size_16/Bird7/results_210531_190257	results/Bengalese_Finches/hidden_size/hidden_size_16/Bird7/results_210531_190257/config_BirdsongRecognition_bird07.toml	data/BirdsongRecognition/Bird7/Wave_prep_210527_213331.csv	results/Bengalese_Finches/hidden_size/hidden_size_16/Bird7/results_210531_190257/train_dur_45s/replicate_5/TweetyNet/checkpoints/max-val-acc-checkpoint.pt	results/Bengalese_Finches/hidden_size/hidden_size_16/Bird7/results_210531_190257/train_dur_45s/replicate_5/StandardizeSpect	0.02	2.112169159477384	Bird7	1	hidden_size	16	Bengalese Finch	with
819	none	0.9741562913938572	19.17142857142857	0.6793948131207515	30.86611182663394	45	5	TweetyNet	results/Bengalese_Finches/hidden_size/hidden_size_16/Bird7/results_210531_190257	results/Bengalese_Finches/hidden_size/hidden_size_16/Bird7/results_210531_190257/config_BirdsongRecognition_bird07.toml	data/BirdsongRecognition/Bird7/Wave_prep_210527_213331.csv	results/Bengalese_Finches/hidden_size/hidden_size_16/Bird7/results_210531_190257/train_dur_45s/replicate_5/TweetyNet/checkpoints/max-val-acc-checkpoint.pt	results/Bengalese_Finches/hidden_size/hidden_size_16/Bird7/results_210531_190257/train_dur_45s/replicate_5/StandardizeSpect	0.02	2.5843708606142823	Bird7	1	hidden_size	16	Bengalese Finch	without
822	min_segment_dur_majority_vote	0.9808947236320004	0.3714285714285714	0.8477740434634333	0.62040461696895	45	6	TweetyNet	results/Bengalese_Finches/hidden_size/hidden_size_16/Bird7/results_210531_190257	results/Bengalese_Finches/hidden_size/hidden_size_16/Bird7/results_210531_190257/config_BirdsongRecognition_bird07.toml	data/BirdsongRecognition/Bird7/Wave_prep_210527_213331.csv	results/Bengalese_Finches/hidden_size/hidden_size_16/Bird7/results_210531_190257/train_dur_45s/replicate_6/TweetyNet/checkpoints/max-val-acc-checkpoint.pt	results/Bengalese_Finches/hidden_size/hidden_size_16/Bird7/results_210531_190257/train_dur_45s/replicate_6/StandardizeSpect	0.02	1.9105276367999524	Bird7	1	hidden_size	16	Bengalese Finch	with
823	none	0.9750903089132608	19.11428571428572	0.6612691913378654	30.43075042335397	45	6	TweetyNet	results/Bengalese_Finches/hidden_size/hidden_size_16/Bird7/results_210531_190257	results/Bengalese_Finches/hidden_size/hidden_size_16/Bird7/results_210531_190257/config_BirdsongRecognition_bird07.toml	data/BirdsongRecognition/Bird7/Wave_prep_210527_213331.csv	results/Bengalese_Finches/hidden_size/hidden_size_16/Bird7/results_210531_190257/train_dur_45s/replicate_6/TweetyNet/checkpoints/max-val-acc-checkpoint.pt	results/Bengalese_Finches/hidden_size/hidden_size_16/Bird7/results_210531_190257/train_dur_45s/replicate_6/StandardizeSpect	0.02	2.4909691086739127	Bird7	1	hidden_size	16	Bengalese Finch	without
826	min_segment_dur_majority_vote	0.9762514915697654	0.8857142857142857	0.7926868764962004	1.48780892905792	45	7	TweetyNet	results/Bengalese_Finches/hidden_size/hidden_size_16/Bird7/results_210531_190257	results/Bengalese_Finches/hidden_size/hidden_size_16/Bird7/results_210531_190257/config_BirdsongRecognition_bird07.toml	data/BirdsongRecognition/Bird7/Wave_prep_210527_213331.csv	results/Bengalese_Finches/hidden_size/hidden_size_16/Bird7/results_210531_190257/train_dur_45s/replicate_7/TweetyNet/checkpoints/max-val-acc-checkpoint.pt	results/Bengalese_Finches/hidden_size/hidden_size_16/Bird7/results_210531_190257/train_dur_45s/replicate_7/StandardizeSpect	0.02	2.374850843023457	Bird7	1	hidden_size	16	Bengalese Finch	with
827	none	0.9726733114687988	13.571428571428571	0.6861829687384703	21.58421613321092	45	7	TweetyNet	results/Bengalese_Finches/hidden_size/hidden_size_16/Bird7/results_210531_190257	results/Bengalese_Finches/hidden_size/hidden_size_16/Bird7/results_210531_190257/config_BirdsongRecognition_bird07.toml	data/BirdsongRecognition/Bird7/Wave_prep_210527_213331.csv	results/Bengalese_Finches/hidden_size/hidden_size_16/Bird7/results_210531_190257/train_dur_45s/replicate_7/TweetyNet/checkpoints/max-val-acc-checkpoint.pt	results/Bengalese_Finches/hidden_size/hidden_size_16/Bird7/results_210531_190257/train_dur_45s/replicate_7/StandardizeSpect	0.02	2.732668853120135	Bird7	1	hidden_size	16	Bengalese Finch	without
830	min_segment_dur_majority_vote	0.9792093756690612	0.7142857142857143	0.8010276282844638	1.19843004387703	45	8	TweetyNet	results/Bengalese_Finches/hidden_size/hidden_size_16/Bird7/results_210531_190257	results/Bengalese_Finches/hidden_size/hidden_size_16/Bird7/results_210531_190257/config_BirdsongRecognition_bird07.toml	data/BirdsongRecognition/Bird7/Wave_prep_210527_213331.csv	results/Bengalese_Finches/hidden_size/hidden_size_16/Bird7/results_210531_190257/train_dur_45s/replicate_8/TweetyNet/checkpoints/max-val-acc-checkpoint.pt	results/Bengalese_Finches/hidden_size/hidden_size_16/Bird7/results_210531_190257/train_dur_45s/replicate_8/StandardizeSpect	0.02	2.0790624330938923	Bird7	1	hidden_size	16	Bengalese Finch	with
831	none	0.9743779187499474	15.942857142857145	0.6545340763334738	25.52369913468847	45	8	TweetyNet	results/Bengalese_Finches/hidden_size/hidden_size_16/Bird7/results_210531_190257	results/Bengalese_Finches/hidden_size/hidden_size_16/Bird7/results_210531_190257/config_BirdsongRecognition_bird07.toml	data/BirdsongRecognition/Bird7/Wave_prep_210527_213331.csv	results/Bengalese_Finches/hidden_size/hidden_size_16/Bird7/results_210531_190257/train_dur_45s/replicate_8/TweetyNet/checkpoints/max-val-acc-checkpoint.pt	results/Bengalese_Finches/hidden_size/hidden_size_16/Bird7/results_210531_190257/train_dur_45s/replicate_8/StandardizeSpect	0.02	2.562208125005261	Bird7	1	hidden_size	16	Bengalese Finch	without
834	min_segment_dur_majority_vote	0.9790271984357648	0.5428571428571428	0.8304963431978881	0.94411202150208	45	9	TweetyNet	results/Bengalese_Finches/hidden_size/hidden_size_16/Bird7/results_210531_190257	results/Bengalese_Finches/hidden_size/hidden_size_16/Bird7/results_210531_190257/config_BirdsongRecognition_bird07.toml	data/BirdsongRecognition/Bird7/Wave_prep_210527_213331.csv	results/Bengalese_Finches/hidden_size/hidden_size_16/Bird7/results_210531_190257/train_dur_45s/replicate_9/TweetyNet/checkpoints/max-val-acc-checkpoint.pt	results/Bengalese_Finches/hidden_size/hidden_size_16/Bird7/results_210531_190257/train_dur_45s/replicate_9/StandardizeSpect	0.02	2.097280156423509	Bird7	1	hidden_size	16	Bengalese Finch	with
835	none	0.9750569084825136	15.542857142857144	0.7085345265510756	25.269414504013497	45	9	TweetyNet	results/Bengalese_Finches/hidden_size/hidden_size_16/Bird7/results_210531_190257	results/Bengalese_Finches/hidden_size/hidden_size_16/Bird7/results_210531_190257/config_BirdsongRecognition_bird07.toml	data/BirdsongRecognition/Bird7/Wave_prep_210527_213331.csv	results/Bengalese_Finches/hidden_size/hidden_size_16/Bird7/results_210531_190257/train_dur_45s/replicate_9/TweetyNet/checkpoints/max-val-acc-checkpoint.pt	results/Bengalese_Finches/hidden_size/hidden_size_16/Bird7/results_210531_190257/train_dur_45s/replicate_9/StandardizeSpect	0.02	2.4943091517486526	Bird7	1	hidden_size	16	Bengalese Finch	without
838	min_segment_dur_majority_vote	0.9784985696487892	0.4857142857142857	0.8226833873514362	0.89709005637553	45	10	TweetyNet	results/Bengalese_Finches/hidden_size/hidden_size_16/Bird7/results_210531_190257	results/Bengalese_Finches/hidden_size/hidden_size_16/Bird7/results_210531_190257/config_BirdsongRecognition_bird07.toml	data/BirdsongRecognition/Bird7/Wave_prep_210527_213331.csv	results/Bengalese_Finches/hidden_size/hidden_size_16/Bird7/results_210531_190257/train_dur_45s/replicate_10/TweetyNet/checkpoints/max-val-acc-checkpoint.pt	results/Bengalese_Finches/hidden_size/hidden_size_16/Bird7/results_210531_190257/train_dur_45s/replicate_10/StandardizeSpect	0.02	2.150143035121077	Bird7	1	hidden_size	16	Bengalese Finch	with
839	none	0.9735992623284924	15.457142857142856	0.6826788075236616	24.46510797922788	45	10	TweetyNet	results/Bengalese_Finches/hidden_size/hidden_size_16/Bird7/results_210531_190257	results/Bengalese_Finches/hidden_size/hidden_size_16/Bird7/results_210531_190257/config_BirdsongRecognition_bird07.toml	data/BirdsongRecognition/Bird7/Wave_prep_210527_213331.csv	results/Bengalese_Finches/hidden_size/hidden_size_16/Bird7/results_210531_190257/train_dur_45s/replicate_10/TweetyNet/checkpoints/max-val-acc-checkpoint.pt	results/Bengalese_Finches/hidden_size/hidden_size_16/Bird7/results_210531_190257/train_dur_45s/replicate_10/StandardizeSpect	0.02	2.6400737671507746	Bird7	1	hidden_size	16	Bengalese Finch	without
842	min_segment_dur_majority_vote	0.9816474089506508	0.4516129032258064	0.8660014162681232	0.52745624599213	75	1	TweetyNet	results/Bengalese_Finches/hidden_size/hidden_size_16/Bird9/results_210603_122731	results/Bengalese_Finches/hidden_size/hidden_size_16/Bird9/results_210603_122731/config_BirdsongRecognition_bird09.toml	data/BirdsongRecognition/Bird9/Wave_prep_210527_213350.csv	results/Bengalese_Finches/hidden_size/hidden_size_16/Bird9/results_210603_122731/train_dur_75s/replicate_1/TweetyNet/checkpoints/max-val-acc-checkpoint.pt	results/Bengalese_Finches/hidden_size/hidden_size_16/Bird9/results_210603_122731/train_dur_75s/replicate_1/StandardizeSpect	0.02	1.8352591049349165	Bird9	2	hidden_size	16	Bengalese Finch	with
843	none	0.9792848326274272	11.32258064516129	0.7693627297266051	13.012232491264438	75	1	TweetyNet	results/Bengalese_Finches/hidden_size/hidden_size_16/Bird9/results_210603_122731	results/Bengalese_Finches/hidden_size/hidden_size_16/Bird9/results_210603_122731/config_BirdsongRecognition_bird09.toml	data/BirdsongRecognition/Bird9/Wave_prep_210527_213350.csv	results/Bengalese_Finches/hidden_size/hidden_size_16/Bird9/results_210603_122731/train_dur_75s/replicate_1/TweetyNet/checkpoints/max-val-acc-checkpoint.pt	results/Bengalese_Finches/hidden_size/hidden_size_16/Bird9/results_210603_122731/train_dur_75s/replicate_1/StandardizeSpect	0.02	2.071516737257273	Bird9	2	hidden_size	16	Bengalese Finch	without
846	min_segment_dur_majority_vote	0.981551041232005	0.4516129032258064	0.8529271046540504	0.4528117957938299	75	2	TweetyNet	results/Bengalese_Finches/hidden_size/hidden_size_16/Bird9/results_210603_122731	results/Bengalese_Finches/hidden_size/hidden_size_16/Bird9/results_210603_122731/config_BirdsongRecognition_bird09.toml	data/BirdsongRecognition/Bird9/Wave_prep_210527_213350.csv	results/Bengalese_Finches/hidden_size/hidden_size_16/Bird9/results_210603_122731/train_dur_75s/replicate_2/TweetyNet/checkpoints/max-val-acc-checkpoint.pt	results/Bengalese_Finches/hidden_size/hidden_size_16/Bird9/results_210603_122731/train_dur_75s/replicate_2/StandardizeSpect	0.02	1.8448958767995016	Bird9	2	hidden_size	16	Bengalese Finch	with
847	none	0.9798487508053147	8.225806451612904	0.7828530326149473	9.02651777748585	75	2	TweetyNet	results/Bengalese_Finches/hidden_size/hidden_size_16/Bird9/results_210603_122731	results/Bengalese_Finches/hidden_size/hidden_size_16/Bird9/results_210603_122731/config_BirdsongRecognition_bird09.toml	data/BirdsongRecognition/Bird9/Wave_prep_210527_213350.csv	results/Bengalese_Finches/hidden_size/hidden_size_16/Bird9/results_210603_122731/train_dur_75s/replicate_2/TweetyNet/checkpoints/max-val-acc-checkpoint.pt	results/Bengalese_Finches/hidden_size/hidden_size_16/Bird9/results_210603_122731/train_dur_75s/replicate_2/StandardizeSpect	0.02	2.015124919468525	Bird9	2	hidden_size	16	Bengalese Finch	without
850	min_segment_dur_majority_vote	0.9813628145456116	0.4838709677419355	0.8448332105332036	0.56094817359558	75	3	TweetyNet	results/Bengalese_Finches/hidden_size/hidden_size_16/Bird9/results_210603_122731	results/Bengalese_Finches/hidden_size/hidden_size_16/Bird9/results_210603_122731/config_BirdsongRecognition_bird09.toml	data/BirdsongRecognition/Bird9/Wave_prep_210527_213350.csv	results/Bengalese_Finches/hidden_size/hidden_size_16/Bird9/results_210603_122731/train_dur_75s/replicate_3/TweetyNet/checkpoints/max-val-acc-checkpoint.pt	results/Bengalese_Finches/hidden_size/hidden_size_16/Bird9/results_210603_122731/train_dur_75s/replicate_3/StandardizeSpect	0.02	1.8637185454388527	Bird9	2	hidden_size	16	Bengalese Finch	with
851	none	0.9786383530141206	11.419354838709678	0.7369833215812178	12.775094507735622	75	3	TweetyNet	results/Bengalese_Finches/hidden_size/hidden_size_16/Bird9/results_210603_122731	results/Bengalese_Finches/hidden_size/hidden_size_16/Bird9/results_210603_122731/config_BirdsongRecognition_bird09.toml	data/BirdsongRecognition/Bird9/Wave_prep_210527_213350.csv	results/Bengalese_Finches/hidden_size/hidden_size_16/Bird9/results_210603_122731/train_dur_75s/replicate_3/TweetyNet/checkpoints/max-val-acc-checkpoint.pt	results/Bengalese_Finches/hidden_size/hidden_size_16/Bird9/results_210603_122731/train_dur_75s/replicate_3/StandardizeSpect	0.02	2.136164698587939	Bird9	2	hidden_size	16	Bengalese Finch	without
854	min_segment_dur_majority_vote	0.9804728095296326	0.7096774193548387	0.8304325370733473	0.862678732623	75	4	TweetyNet	results/Bengalese_Finches/hidden_size/hidden_size_16/Bird9/results_210603_122731	results/Bengalese_Finches/hidden_size/hidden_size_16/Bird9/results_210603_122731/config_BirdsongRecognition_bird09.toml	data/BirdsongRecognition/Bird9/Wave_prep_210527_213350.csv	results/Bengalese_Finches/hidden_size/hidden_size_16/Bird9/results_210603_122731/train_dur_75s/replicate_4/TweetyNet/checkpoints/max-val-acc-checkpoint.pt	results/Bengalese_Finches/hidden_size/hidden_size_16/Bird9/results_210603_122731/train_dur_75s/replicate_4/StandardizeSpect	0.02	1.952719047036744	Bird9	2	hidden_size	16	Bengalese Finch	with
855	none	0.9788059779780508	7.354838709677419	0.7653467183352644	8.45811095550046	75	4	TweetyNet	results/Bengalese_Finches/hidden_size/hidden_size_16/Bird9/results_210603_122731	results/Bengalese_Finches/hidden_size/hidden_size_16/Bird9/results_210603_122731/config_BirdsongRecognition_bird09.toml	data/BirdsongRecognition/Bird9/Wave_prep_210527_213350.csv	results/Bengalese_Finches/hidden_size/hidden_size_16/Bird9/results_210603_122731/train_dur_75s/replicate_4/TweetyNet/checkpoints/max-val-acc-checkpoint.pt	results/Bengalese_Finches/hidden_size/hidden_size_16/Bird9/results_210603_122731/train_dur_75s/replicate_4/StandardizeSpect	0.02	2.119402202194909	Bird9	2	hidden_size	16	Bengalese Finch	without
858	min_segment_dur_majority_vote	0.9811039957979816	0.4516129032258064	0.8580331133190507	0.50516403564029	75	5	TweetyNet	results/Bengalese_Finches/hidden_size/hidden_size_16/Bird9/results_210603_122731	results/Bengalese_Finches/hidden_size/hidden_size_16/Bird9/results_210603_122731/config_BirdsongRecognition_bird09.toml	data/BirdsongRecognition/Bird9/Wave_prep_210527_213350.csv	results/Bengalese_Finches/hidden_size/hidden_size_16/Bird9/results_210603_122731/train_dur_75s/replicate_5/TweetyNet/checkpoints/max-val-acc-checkpoint.pt	results/Bengalese_Finches/hidden_size/hidden_size_16/Bird9/results_210603_122731/train_dur_75s/replicate_5/StandardizeSpect	0.02	1.8896004202018533	Bird9	2	hidden_size	16	Bengalese Finch	with
859	none	0.9785244761237624	9.774193548387096	0.7557466245127094	10.95187622335682	75	5	TweetyNet	results/Bengalese_Finches/hidden_size/hidden_size_16/Bird9/results_210603_122731	results/Bengalese_Finches/hidden_size/hidden_size_16/Bird9/results_210603_122731/config_BirdsongRecognition_bird09.toml	data/BirdsongRecognition/Bird9/Wave_prep_210527_213350.csv	results/Bengalese_Finches/hidden_size/hidden_size_16/Bird9/results_210603_122731/train_dur_75s/replicate_5/TweetyNet/checkpoints/max-val-acc-checkpoint.pt	results/Bengalese_Finches/hidden_size/hidden_size_16/Bird9/results_210603_122731/train_dur_75s/replicate_5/StandardizeSpect	0.02	2.1475523876237634	Bird9	2	hidden_size	16	Bengalese Finch	without
862	min_segment_dur_majority_vote	0.9808226092015592	0.4838709677419355	0.8516370925875696	0.5412061095287299	75	6	TweetyNet	results/Bengalese_Finches/hidden_size/hidden_size_16/Bird9/results_210603_122731	results/Bengalese_Finches/hidden_size/hidden_size_16/Bird9/results_210603_122731/config_BirdsongRecognition_bird09.toml	data/BirdsongRecognition/Bird9/Wave_prep_210527_213350.csv	results/Bengalese_Finches/hidden_size/hidden_size_16/Bird9/results_210603_122731/train_dur_75s/replicate_6/TweetyNet/checkpoints/max-val-acc-checkpoint.pt	results/Bengalese_Finches/hidden_size/hidden_size_16/Bird9/results_210603_122731/train_dur_75s/replicate_6/StandardizeSpect	0.02	1.917739079844094	Bird9	2	hidden_size	16	Bengalese Finch	with
863	none	0.9787069908435732	8.612903225806452	0.763914017345905	9.71341032002546	75	6	TweetyNet	results/Bengalese_Finches/hidden_size/hidden_size_16/Bird9/results_210603_122731	results/Bengalese_Finches/hidden_size/hidden_size_16/Bird9/results_210603_122731/config_BirdsongRecognition_bird09.toml	data/BirdsongRecognition/Bird9/Wave_prep_210527_213350.csv	results/Bengalese_Finches/hidden_size/hidden_size_16/Bird9/results_210603_122731/train_dur_75s/replicate_6/TweetyNet/checkpoints/max-val-acc-checkpoint.pt	results/Bengalese_Finches/hidden_size/hidden_size_16/Bird9/results_210603_122731/train_dur_75s/replicate_6/StandardizeSpect	0.02	2.1293009156426845	Bird9	2	hidden_size	16	Bengalese Finch	without
866	min_segment_dur_majority_vote	0.9808293386367876	0.4838709677419355	0.8647044523368663	0.5353352673387599	75	7	TweetyNet	results/Bengalese_Finches/hidden_size/hidden_size_16/Bird9/results_210603_122731	results/Bengalese_Finches/hidden_size/hidden_size_16/Bird9/results_210603_122731/config_BirdsongRecognition_bird09.toml	data/BirdsongRecognition/Bird9/Wave_prep_210527_213350.csv	results/Bengalese_Finches/hidden_size/hidden_size_16/Bird9/results_210603_122731/train_dur_75s/replicate_7/TweetyNet/checkpoints/max-val-acc-checkpoint.pt	results/Bengalese_Finches/hidden_size/hidden_size_16/Bird9/results_210603_122731/train_dur_75s/replicate_7/StandardizeSpect	0.02	1.917066136321244	Bird9	2	hidden_size	16	Bengalese Finch	with
867	none	0.9789089391399208	8.35483870967742	0.7826630430534409	9.44332032793666	75	7	TweetyNet	results/Bengalese_Finches/hidden_size/hidden_size_16/Bird9/results_210603_122731	results/Bengalese_Finches/hidden_size/hidden_size_16/Bird9/results_210603_122731/config_BirdsongRecognition_bird09.toml	data/BirdsongRecognition/Bird9/Wave_prep_210527_213350.csv	results/Bengalese_Finches/hidden_size/hidden_size_16/Bird9/results_210603_122731/train_dur_75s/replicate_7/TweetyNet/checkpoints/max-val-acc-checkpoint.pt	results/Bengalese_Finches/hidden_size/hidden_size_16/Bird9/results_210603_122731/train_dur_75s/replicate_7/StandardizeSpect	0.02	2.109106086007906	Bird9	2	hidden_size	16	Bengalese Finch	without
870	min_segment_dur_majority_vote	0.9812501141789748	0.4838709677419355	0.8517220609094387	0.59861851926646	75	8	TweetyNet	results/Bengalese_Finches/hidden_size/hidden_size_16/Bird9/results_210603_122731	results/Bengalese_Finches/hidden_size/hidden_size_16/Bird9/results_210603_122731/config_BirdsongRecognition_bird09.toml	data/BirdsongRecognition/Bird9/Wave_prep_210527_213350.csv	results/Bengalese_Finches/hidden_size/hidden_size_16/Bird9/results_210603_122731/train_dur_75s/replicate_8/TweetyNet/checkpoints/max-val-acc-checkpoint.pt	results/Bengalese_Finches/hidden_size/hidden_size_16/Bird9/results_210603_122731/train_dur_75s/replicate_8/StandardizeSpect	0.02	1.8749885821025325	Bird9	2	hidden_size	16	Bengalese Finch	with
871	none	0.9784291880402058	11.419354838709678	0.7401177960734067	12.80876581381869	75	8	TweetyNet	results/Bengalese_Finches/hidden_size/hidden_size_16/Bird9/results_210603_122731	results/Bengalese_Finches/hidden_size/hidden_size_16/Bird9/results_210603_122731/config_BirdsongRecognition_bird09.toml	data/BirdsongRecognition/Bird9/Wave_prep_210527_213350.csv	results/Bengalese_Finches/hidden_size/hidden_size_16/Bird9/results_210603_122731/train_dur_75s/replicate_8/TweetyNet/checkpoints/max-val-acc-checkpoint.pt	results/Bengalese_Finches/hidden_size/hidden_size_16/Bird9/results_210603_122731/train_dur_75s/replicate_8/StandardizeSpect	0.02	2.157081195979416	Bird9	2	hidden_size	16	Bengalese Finch	without
874	min_segment_dur_majority_vote	0.9812338957547256	0.5161290322580645	0.8506977674807604	0.58009835552264	75	9	TweetyNet	results/Bengalese_Finches/hidden_size/hidden_size_16/Bird9/results_210603_122731	results/Bengalese_Finches/hidden_size/hidden_size_16/Bird9/results_210603_122731/config_BirdsongRecognition_bird09.toml	data/BirdsongRecognition/Bird9/Wave_prep_210527_213350.csv	results/Bengalese_Finches/hidden_size/hidden_size_16/Bird9/results_210603_122731/train_dur_75s/replicate_9/TweetyNet/checkpoints/max-val-acc-checkpoint.pt	results/Bengalese_Finches/hidden_size/hidden_size_16/Bird9/results_210603_122731/train_dur_75s/replicate_9/StandardizeSpect	0.02	1.8766104245274475	Bird9	2	hidden_size	16	Bengalese Finch	with
875	none	0.9796388452615952	8.161290322580646	0.7870468699292787	9.1556704885648	75	9	TweetyNet	results/Bengalese_Finches/hidden_size/hidden_size_16/Bird9/results_210603_122731	results/Bengalese_Finches/hidden_size/hidden_size_16/Bird9/results_210603_122731/config_BirdsongRecognition_bird09.toml	data/BirdsongRecognition/Bird9/Wave_prep_210527_213350.csv	results/Bengalese_Finches/hidden_size/hidden_size_16/Bird9/results_210603_122731/train_dur_75s/replicate_9/TweetyNet/checkpoints/max-val-acc-checkpoint.pt	results/Bengalese_Finches/hidden_size/hidden_size_16/Bird9/results_210603_122731/train_dur_75s/replicate_9/StandardizeSpect	0.02	2.036115473840483	Bird9	2	hidden_size	16	Bengalese Finch	without
878	min_segment_dur_majority_vote	0.9813162082585304	0.5161290322580645	0.8420468836769914	0.5821676996669299	75	10	TweetyNet	results/Bengalese_Finches/hidden_size/hidden_size_16/Bird9/results_210603_122731	results/Bengalese_Finches/hidden_size/hidden_size_16/Bird9/results_210603_122731/config_BirdsongRecognition_bird09.toml	data/BirdsongRecognition/Bird9/Wave_prep_210527_213350.csv	results/Bengalese_Finches/hidden_size/hidden_size_16/Bird9/results_210603_122731/train_dur_75s/replicate_10/TweetyNet/checkpoints/max-val-acc-checkpoint.pt	results/Bengalese_Finches/hidden_size/hidden_size_16/Bird9/results_210603_122731/train_dur_75s/replicate_10/StandardizeSpect	0.02	1.8683791741469724	Bird9	2	hidden_size	16	Bengalese Finch	with
879	none	0.979556682560438	8.0	0.7694827052114291	8.98502062538756	75	10	TweetyNet	results/Bengalese_Finches/hidden_size/hidden_size_16/Bird9/results_210603_122731	results/Bengalese_Finches/hidden_size/hidden_size_16/Bird9/results_210603_122731/config_BirdsongRecognition_bird09.toml	data/BirdsongRecognition/Bird9/Wave_prep_210527_213350.csv	results/Bengalese_Finches/hidden_size/hidden_size_16/Bird9/results_210603_122731/train_dur_75s/replicate_10/TweetyNet/checkpoints/max-val-acc-checkpoint.pt	results/Bengalese_Finches/hidden_size/hidden_size_16/Bird9/results_210603_122731/train_dur_75s/replicate_10/StandardizeSpect	0.02	2.044331743956196	Bird9	2	hidden_size	16	Bengalese Finch	without
882	min_segment_dur_majority_vote	0.9815225853600325	0.5806451612903226	0.8493096427052327	0.68024505586819	120	1	TweetyNet	results/Bengalese_Finches/hidden_size/hidden_size_16/Bird9/results_210603_122731	results/Bengalese_Finches/hidden_size/hidden_size_16/Bird9/results_210603_122731/config_BirdsongRecognition_bird09.toml	data/BirdsongRecognition/Bird9/Wave_prep_210527_213350.csv	results/Bengalese_Finches/hidden_size/hidden_size_16/Bird9/results_210603_122731/train_dur_120s/replicate_1/TweetyNet/checkpoints/max-val-acc-checkpoint.pt	results/Bengalese_Finches/hidden_size/hidden_size_16/Bird9/results_210603_122731/train_dur_120s/replicate_1/StandardizeSpect	0.02	1.847741463996766	Bird9	3	hidden_size	16	Bengalese Finch	with
883	none	0.979525977414754	9.290322580645162	0.7686858526763086	10.69584579654137	120	1	TweetyNet	results/Bengalese_Finches/hidden_size/hidden_size_16/Bird9/results_210603_122731	results/Bengalese_Finches/hidden_size/hidden_size_16/Bird9/results_210603_122731/config_BirdsongRecognition_bird09.toml	data/BirdsongRecognition/Bird9/Wave_prep_210527_213350.csv	results/Bengalese_Finches/hidden_size/hidden_size_16/Bird9/results_210603_122731/train_dur_120s/replicate_1/TweetyNet/checkpoints/max-val-acc-checkpoint.pt	results/Bengalese_Finches/hidden_size/hidden_size_16/Bird9/results_210603_122731/train_dur_120s/replicate_1/StandardizeSpect	0.02	2.0474022585246	Bird9	3	hidden_size	16	Bengalese Finch	without
886	min_segment_dur_majority_vote	0.9810968170618956	0.7096774193548387	0.8226046024792335	0.8031800834904099	120	2	TweetyNet	results/Bengalese_Finches/hidden_size/hidden_size_16/Bird9/results_210603_122731	results/Bengalese_Finches/hidden_size/hidden_size_16/Bird9/results_210603_122731/config_BirdsongRecognition_bird09.toml	data/BirdsongRecognition/Bird9/Wave_prep_210527_213350.csv	results/Bengalese_Finches/hidden_size/hidden_size_16/Bird9/results_210603_122731/train_dur_120s/replicate_2/TweetyNet/checkpoints/max-val-acc-checkpoint.pt	results/Bengalese_Finches/hidden_size/hidden_size_16/Bird9/results_210603_122731/train_dur_120s/replicate_2/StandardizeSpect	0.02	1.8903182938104333	Bird9	3	hidden_size	16	Bengalese Finch	with
887	none	0.9796553276180638	7.193548387096774	0.7645193479873467	8.03480129262277	120	2	TweetyNet	results/Bengalese_Finches/hidden_size/hidden_size_16/Bird9/results_210603_122731	results/Bengalese_Finches/hidden_size/hidden_size_16/Bird9/results_210603_122731/config_BirdsongRecognition_bird09.toml	data/BirdsongRecognition/Bird9/Wave_prep_210527_213350.csv	results/Bengalese_Finches/hidden_size/hidden_size_16/Bird9/results_210603_122731/train_dur_120s/replicate_2/TweetyNet/checkpoints/max-val-acc-checkpoint.pt	results/Bengalese_Finches/hidden_size/hidden_size_16/Bird9/results_210603_122731/train_dur_120s/replicate_2/StandardizeSpect	0.02	2.034467238193616	Bird9	3	hidden_size	16	Bengalese Finch	without
890	min_segment_dur_majority_vote	0.9817877612212746	0.4838709677419355	0.8620120902379819	0.5357205408646301	120	3	TweetyNet	results/Bengalese_Finches/hidden_size/hidden_size_16/Bird9/results_210603_122731	results/Bengalese_Finches/hidden_size/hidden_size_16/Bird9/results_210603_122731/config_BirdsongRecognition_bird09.toml	data/BirdsongRecognition/Bird9/Wave_prep_210527_213350.csv	results/Bengalese_Finches/hidden_size/hidden_size_16/Bird9/results_210603_122731/train_dur_120s/replicate_3/TweetyNet/checkpoints/max-val-acc-checkpoint.pt	results/Bengalese_Finches/hidden_size/hidden_size_16/Bird9/results_210603_122731/train_dur_120s/replicate_3/StandardizeSpect	0.02	1.821223877872536	Bird9	3	hidden_size	16	Bengalese Finch	with
891	none	0.9793138716287249	8.774193548387096	0.7637037173826099	9.86107205443296	120	3	TweetyNet	results/Bengalese_Finches/hidden_size/hidden_size_16/Bird9/results_210603_122731	results/Bengalese_Finches/hidden_size/hidden_size_16/Bird9/results_210603_122731/config_BirdsongRecognition_bird09.toml	data/BirdsongRecognition/Bird9/Wave_prep_210527_213350.csv	results/Bengalese_Finches/hidden_size/hidden_size_16/Bird9/results_210603_122731/train_dur_120s/replicate_3/TweetyNet/checkpoints/max-val-acc-checkpoint.pt	results/Bengalese_Finches/hidden_size/hidden_size_16/Bird9/results_210603_122731/train_dur_120s/replicate_3/StandardizeSpect	0.02	2.068612837127526	Bird9	3	hidden_size	16	Bengalese Finch	without
894	min_segment_dur_majority_vote	0.9819471265607472	0.4516129032258064	0.8490249234974603	0.49797834574687	120	4	TweetyNet	results/Bengalese_Finches/hidden_size/hidden_size_16/Bird9/results_210603_122731	results/Bengalese_Finches/hidden_size/hidden_size_16/Bird9/results_210603_122731/config_BirdsongRecognition_bird09.toml	data/BirdsongRecognition/Bird9/Wave_prep_210527_213350.csv	results/Bengalese_Finches/hidden_size/hidden_size_16/Bird9/results_210603_122731/train_dur_120s/replicate_4/TweetyNet/checkpoints/max-val-acc-checkpoint.pt	results/Bengalese_Finches/hidden_size/hidden_size_16/Bird9/results_210603_122731/train_dur_120s/replicate_4/StandardizeSpect	0.02	1.805287343925266	Bird9	3	hidden_size	16	Bengalese Finch	with
895	none	0.9804313899951504	6.870967741935484	0.7875727641105024	7.90561531083936	120	4	TweetyNet	results/Bengalese_Finches/hidden_size/hidden_size_16/Bird9/results_210603_122731	results/Bengalese_Finches/hidden_size/hidden_size_16/Bird9/results_210603_122731/config_BirdsongRecognition_bird09.toml	data/BirdsongRecognition/Bird9/Wave_prep_210527_213350.csv	results/Bengalese_Finches/hidden_size/hidden_size_16/Bird9/results_210603_122731/train_dur_120s/replicate_4/TweetyNet/checkpoints/max-val-acc-checkpoint.pt	results/Bengalese_Finches/hidden_size/hidden_size_16/Bird9/results_210603_122731/train_dur_120s/replicate_4/StandardizeSpect	0.02	1.9568610004849551	Bird9	3	hidden_size	16	Bengalese Finch	without
898	min_segment_dur_majority_vote	0.9801375763124016	0.6451612903225806	0.8161705146937456	0.73244546324653	120	5	TweetyNet	results/Bengalese_Finches/hidden_size/hidden_size_16/Bird9/results_210603_122731	results/Bengalese_Finches/hidden_size/hidden_size_16/Bird9/results_210603_122731/config_BirdsongRecognition_bird09.toml	data/BirdsongRecognition/Bird9/Wave_prep_210527_213350.csv	results/Bengalese_Finches/hidden_size/hidden_size_16/Bird9/results_210603_122731/train_dur_120s/replicate_5/TweetyNet/checkpoints/max-val-acc-checkpoint.pt	results/Bengalese_Finches/hidden_size/hidden_size_16/Bird9/results_210603_122731/train_dur_120s/replicate_5/StandardizeSpect	0.02	1.986242368759828	Bird9	3	hidden_size	16	Bengalese Finch	with
899	none	0.9781326033625396	8.580645161290322	0.7390234578637674	9.659512705056873	120	5	TweetyNet	results/Bengalese_Finches/hidden_size/hidden_size_16/Bird9/results_210603_122731	results/Bengalese_Finches/hidden_size/hidden_size_16/Bird9/results_210603_122731/config_BirdsongRecognition_bird09.toml	data/BirdsongRecognition/Bird9/Wave_prep_210527_213350.csv	results/Bengalese_Finches/hidden_size/hidden_size_16/Bird9/results_210603_122731/train_dur_120s/replicate_5/TweetyNet/checkpoints/max-val-acc-checkpoint.pt	results/Bengalese_Finches/hidden_size/hidden_size_16/Bird9/results_210603_122731/train_dur_120s/replicate_5/StandardizeSpect	0.02	2.186739663746051	Bird9	3	hidden_size	16	Bengalese Finch	without
902	min_segment_dur_majority_vote	0.9820453721262004	0.5161290322580645	0.8366216619598296	0.57912224695729	120	6	TweetyNet	results/Bengalese_Finches/hidden_size/hidden_size_16/Bird9/results_210603_122731	results/Bengalese_Finches/hidden_size/hidden_size_16/Bird9/results_210603_122731/config_BirdsongRecognition_bird09.toml	data/BirdsongRecognition/Bird9/Wave_prep_210527_213350.csv	results/Bengalese_Finches/hidden_size/hidden_size_16/Bird9/results_210603_122731/train_dur_120s/replicate_6/TweetyNet/checkpoints/max-val-acc-checkpoint.pt	results/Bengalese_Finches/hidden_size/hidden_size_16/Bird9/results_210603_122731/train_dur_120s/replicate_6/StandardizeSpect	0.02	1.7954627873799534	Bird9	3	hidden_size	16	Bengalese Finch	with
903	none	0.9799391373877668	9.129032258064516	0.7461741733987256	10.74237489103143	120	6	TweetyNet	results/Bengalese_Finches/hidden_size/hidden_size_16/Bird9/results_210603_122731	results/Bengalese_Finches/hidden_size/hidden_size_16/Bird9/results_210603_122731/config_BirdsongRecognition_bird09.toml	data/BirdsongRecognition/Bird9/Wave_prep_210527_213350.csv	results/Bengalese_Finches/hidden_size/hidden_size_16/Bird9/results_210603_122731/train_dur_120s/replicate_6/TweetyNet/checkpoints/max-val-acc-checkpoint.pt	results/Bengalese_Finches/hidden_size/hidden_size_16/Bird9/results_210603_122731/train_dur_120s/replicate_6/StandardizeSpect	0.02	2.006086261223317	Bird9	3	hidden_size	16	Bengalese Finch	without
906	min_segment_dur_majority_vote	0.9801186241984428	0.7419354838709677	0.8087423832806754	0.82653337430998	120	7	TweetyNet	results/Bengalese_Finches/hidden_size/hidden_size_16/Bird9/results_210603_122731	results/Bengalese_Finches/hidden_size/hidden_size_16/Bird9/results_210603_122731/config_BirdsongRecognition_bird09.toml	data/BirdsongRecognition/Bird9/Wave_prep_210527_213350.csv	results/Bengalese_Finches/hidden_size/hidden_size_16/Bird9/results_210603_122731/train_dur_120s/replicate_7/TweetyNet/checkpoints/max-val-acc-checkpoint.pt	results/Bengalese_Finches/hidden_size/hidden_size_16/Bird9/results_210603_122731/train_dur_120s/replicate_7/StandardizeSpect	0.02	1.9881375801557133	Bird9	3	hidden_size	16	Bengalese Finch	with
907	none	0.9784850608017044	8.806451612903226	0.7438770760048482	9.79948795975785	120	7	TweetyNet	results/Bengalese_Finches/hidden_size/hidden_size_16/Bird9/results_210603_122731	results/Bengalese_Finches/hidden_size/hidden_size_16/Bird9/results_210603_122731/config_BirdsongRecognition_bird09.toml	data/BirdsongRecognition/Bird9/Wave_prep_210527_213350.csv	results/Bengalese_Finches/hidden_size/hidden_size_16/Bird9/results_210603_122731/train_dur_120s/replicate_7/TweetyNet/checkpoints/max-val-acc-checkpoint.pt	results/Bengalese_Finches/hidden_size/hidden_size_16/Bird9/results_210603_122731/train_dur_120s/replicate_7/StandardizeSpect	0.02	2.1514939198295724	Bird9	3	hidden_size	16	Bengalese Finch	without
910	min_segment_dur_majority_vote	0.980310376138766	0.6774193548387096	0.8335396655758304	0.79930587867216	120	8	TweetyNet	results/Bengalese_Finches/hidden_size/hidden_size_16/Bird9/results_210603_122731	results/Bengalese_Finches/hidden_size/hidden_size_16/Bird9/results_210603_122731/config_BirdsongRecognition_bird09.toml	data/BirdsongRecognition/Bird9/Wave_prep_210527_213350.csv	results/Bengalese_Finches/hidden_size/hidden_size_16/Bird9/results_210603_122731/train_dur_120s/replicate_8/TweetyNet/checkpoints/max-val-acc-checkpoint.pt	results/Bengalese_Finches/hidden_size/hidden_size_16/Bird9/results_210603_122731/train_dur_120s/replicate_8/StandardizeSpect	0.02	1.968962386123396	Bird9	3	hidden_size	16	Bengalese Finch	with
911	none	0.9782900505222644	10.516129032258064	0.7518730397234995	12.1148803504386	120	8	TweetyNet	results/Bengalese_Finches/hidden_size/hidden_size_16/Bird9/results_210603_122731	results/Bengalese_Finches/hidden_size/hidden_size_16/Bird9/results_210603_122731/config_BirdsongRecognition_bird09.toml	data/BirdsongRecognition/Bird9/Wave_prep_210527_213350.csv	results/Bengalese_Finches/hidden_size/hidden_size_16/Bird9/results_210603_122731/train_dur_120s/replicate_8/TweetyNet/checkpoints/max-val-acc-checkpoint.pt	results/Bengalese_Finches/hidden_size/hidden_size_16/Bird9/results_210603_122731/train_dur_120s/replicate_8/StandardizeSpect	0.02	2.1709949477735635	Bird9	3	hidden_size	16	Bengalese Finch	without
914	min_segment_dur_majority_vote	0.980323250557362	0.6129032258064516	0.8305987022005176	0.6803471897986201	120	9	TweetyNet	results/Bengalese_Finches/hidden_size/hidden_size_16/Bird9/results_210603_122731	results/Bengalese_Finches/hidden_size/hidden_size_16/Bird9/results_210603_122731/config_BirdsongRecognition_bird09.toml	data/BirdsongRecognition/Bird9/Wave_prep_210527_213350.csv	results/Bengalese_Finches/hidden_size/hidden_size_16/Bird9/results_210603_122731/train_dur_120s/replicate_9/TweetyNet/checkpoints/max-val-acc-checkpoint.pt	results/Bengalese_Finches/hidden_size/hidden_size_16/Bird9/results_210603_122731/train_dur_120s/replicate_9/StandardizeSpect	0.02	1.9676749442637864	Bird9	3	hidden_size	16	Bengalese Finch	with
915	none	0.9781776093776106	8.419354838709678	0.741467785739372	9.5249637745327	120	9	TweetyNet	results/Bengalese_Finches/hidden_size/hidden_size_16/Bird9/results_210603_122731	results/Bengalese_Finches/hidden_size/hidden_size_16/Bird9/results_210603_122731/config_BirdsongRecognition_bird09.toml	data/BirdsongRecognition/Bird9/Wave_prep_210527_213350.csv	results/Bengalese_Finches/hidden_size/hidden_size_16/Bird9/results_210603_122731/train_dur_120s/replicate_9/TweetyNet/checkpoints/max-val-acc-checkpoint.pt	results/Bengalese_Finches/hidden_size/hidden_size_16/Bird9/results_210603_122731/train_dur_120s/replicate_9/StandardizeSpect	0.02	2.1822390622389443	Bird9	3	hidden_size	16	Bengalese Finch	without
918	min_segment_dur_majority_vote	0.9819289302502652	0.4838709677419355	0.8594506966432844	0.52758354494331	120	10	TweetyNet	results/Bengalese_Finches/hidden_size/hidden_size_16/Bird9/results_210603_122731	results/Bengalese_Finches/hidden_size/hidden_size_16/Bird9/results_210603_122731/config_BirdsongRecognition_bird09.toml	data/BirdsongRecognition/Bird9/Wave_prep_210527_213350.csv	results/Bengalese_Finches/hidden_size/hidden_size_16/Bird9/results_210603_122731/train_dur_120s/replicate_10/TweetyNet/checkpoints/max-val-acc-checkpoint.pt	results/Bengalese_Finches/hidden_size/hidden_size_16/Bird9/results_210603_122731/train_dur_120s/replicate_10/StandardizeSpect	0.02	1.8071069749734825	Bird9	3	hidden_size	16	Bengalese Finch	with
919	none	0.9803202225659547	6.645161290322581	0.7938585986475607	7.28314375410804	120	10	TweetyNet	results/Bengalese_Finches/hidden_size/hidden_size_16/Bird9/results_210603_122731	results/Bengalese_Finches/hidden_size/hidden_size_16/Bird9/results_210603_122731/config_BirdsongRecognition_bird09.toml	data/BirdsongRecognition/Bird9/Wave_prep_210527_213350.csv	results/Bengalese_Finches/hidden_size/hidden_size_16/Bird9/results_210603_122731/train_dur_120s/replicate_10/TweetyNet/checkpoints/max-val-acc-checkpoint.pt	results/Bengalese_Finches/hidden_size/hidden_size_16/Bird9/results_210603_122731/train_dur_120s/replicate_10/StandardizeSpect	0.02	1.9679777434045247	Bird9	3	hidden_size	16	Bengalese Finch	without
922	min_segment_dur_majority_vote	0.9847151064247306	0.3225806451612903	0.8923628006542879	0.33933004188763	600	1	TweetyNet	results/Bengalese_Finches/hidden_size/hidden_size_16/Bird9/results_210603_122731	results/Bengalese_Finches/hidden_size/hidden_size_16/Bird9/results_210603_122731/config_BirdsongRecognition_bird09.toml	data/BirdsongRecognition/Bird9/Wave_prep_210527_213350.csv	results/Bengalese_Finches/hidden_size/hidden_size_16/Bird9/results_210603_122731/train_dur_600s/replicate_1/TweetyNet/checkpoints/max-val-acc-checkpoint.pt	results/Bengalese_Finches/hidden_size/hidden_size_16/Bird9/results_210603_122731/train_dur_600s/replicate_1/StandardizeSpect	0.02	1.528489357526941	Bird9	6	hidden_size	16	Bengalese Finch	with
923	none	0.983860255808914	4.096774193548387	0.8433016003083997	4.72821658848477	600	1	TweetyNet	results/Bengalese_Finches/hidden_size/hidden_size_16/Bird9/results_210603_122731	results/Bengalese_Finches/hidden_size/hidden_size_16/Bird9/results_210603_122731/config_BirdsongRecognition_bird09.toml	data/BirdsongRecognition/Bird9/Wave_prep_210527_213350.csv	results/Bengalese_Finches/hidden_size/hidden_size_16/Bird9/results_210603_122731/train_dur_600s/replicate_1/TweetyNet/checkpoints/max-val-acc-checkpoint.pt	results/Bengalese_Finches/hidden_size/hidden_size_16/Bird9/results_210603_122731/train_dur_600s/replicate_1/StandardizeSpect	0.02	1.6139744191086105	Bird9	6	hidden_size	16	Bengalese Finch	without
926	min_segment_dur_majority_vote	0.9837046315855104	0.3225806451612903	0.8765502445537547	0.33867778518377	600	2	TweetyNet	results/Bengalese_Finches/hidden_size/hidden_size_16/Bird9/results_210603_122731	results/Bengalese_Finches/hidden_size/hidden_size_16/Bird9/results_210603_122731/config_BirdsongRecognition_bird09.toml	data/BirdsongRecognition/Bird9/Wave_prep_210527_213350.csv	results/Bengalese_Finches/hidden_size/hidden_size_16/Bird9/results_210603_122731/train_dur_600s/replicate_2/TweetyNet/checkpoints/max-val-acc-checkpoint.pt	results/Bengalese_Finches/hidden_size/hidden_size_16/Bird9/results_210603_122731/train_dur_600s/replicate_2/StandardizeSpect	0.02	1.629536841448953	Bird9	6	hidden_size	16	Bengalese Finch	with
927	none	0.9824612430920502	5.32258064516129	0.8101569329659137	5.87709691760405	600	2	TweetyNet	results/Bengalese_Finches/hidden_size/hidden_size_16/Bird9/results_210603_122731	results/Bengalese_Finches/hidden_size/hidden_size_16/Bird9/results_210603_122731/config_BirdsongRecognition_bird09.toml	data/BirdsongRecognition/Bird9/Wave_prep_210527_213350.csv	results/Bengalese_Finches/hidden_size/hidden_size_16/Bird9/results_210603_122731/train_dur_600s/replicate_2/TweetyNet/checkpoints/max-val-acc-checkpoint.pt	results/Bengalese_Finches/hidden_size/hidden_size_16/Bird9/results_210603_122731/train_dur_600s/replicate_2/StandardizeSpect	0.02	1.7538756907949815	Bird9	6	hidden_size	16	Bengalese Finch	without
930	min_segment_dur_majority_vote	0.984431223670814	0.3548387096774194	0.8786605291270401	0.3904299779362	600	3	TweetyNet	results/Bengalese_Finches/hidden_size/hidden_size_16/Bird9/results_210603_122731	results/Bengalese_Finches/hidden_size/hidden_size_16/Bird9/results_210603_122731/config_BirdsongRecognition_bird09.toml	data/BirdsongRecognition/Bird9/Wave_prep_210527_213350.csv	results/Bengalese_Finches/hidden_size/hidden_size_16/Bird9/results_210603_122731/train_dur_600s/replicate_3/TweetyNet/checkpoints/max-val-acc-checkpoint.pt	results/Bengalese_Finches/hidden_size/hidden_size_16/Bird9/results_210603_122731/train_dur_600s/replicate_3/StandardizeSpect	0.02	1.5568776329185852	Bird9	6	hidden_size	16	Bengalese Finch	with
931	none	0.9836747080055812	3.6774193548387095	0.8315727851639589	3.9781882104975104	600	3	TweetyNet	results/Bengalese_Finches/hidden_size/hidden_size_16/Bird9/results_210603_122731	results/Bengalese_Finches/hidden_size/hidden_size_16/Bird9/results_210603_122731/config_BirdsongRecognition_bird09.toml	data/BirdsongRecognition/Bird9/Wave_prep_210527_213350.csv	results/Bengalese_Finches/hidden_size/hidden_size_16/Bird9/results_210603_122731/train_dur_600s/replicate_3/TweetyNet/checkpoints/max-val-acc-checkpoint.pt	results/Bengalese_Finches/hidden_size/hidden_size_16/Bird9/results_210603_122731/train_dur_600s/replicate_3/StandardizeSpect	0.02	1.63252919944189	Bird9	6	hidden_size	16	Bengalese Finch	without
934	min_segment_dur_majority_vote	0.9840564580058514	0.3225806451612903	0.8802052922038415	0.34832769674473	600	4	TweetyNet	results/Bengalese_Finches/hidden_size/hidden_size_16/Bird9/results_210603_122731	results/Bengalese_Finches/hidden_size/hidden_size_16/Bird9/results_210603_122731/config_BirdsongRecognition_bird09.toml	data/BirdsongRecognition/Bird9/Wave_prep_210527_213350.csv	results/Bengalese_Finches/hidden_size/hidden_size_16/Bird9/results_210603_122731/train_dur_600s/replicate_4/TweetyNet/checkpoints/max-val-acc-checkpoint.pt	results/Bengalese_Finches/hidden_size/hidden_size_16/Bird9/results_210603_122731/train_dur_600s/replicate_4/StandardizeSpect	0.02	1.5943541994148602	Bird9	6	hidden_size	16	Bengalese Finch	with
935	none	0.9826398606293634	5.451612903225806	0.8108663158225504	6.29335881548673	600	4	TweetyNet	results/Bengalese_Finches/hidden_size/hidden_size_16/Bird9/results_210603_122731	results/Bengalese_Finches/hidden_size/hidden_size_16/Bird9/results_210603_122731/config_BirdsongRecognition_bird09.toml	data/BirdsongRecognition/Bird9/Wave_prep_210527_213350.csv	results/Bengalese_Finches/hidden_size/hidden_size_16/Bird9/results_210603_122731/train_dur_600s/replicate_4/TweetyNet/checkpoints/max-val-acc-checkpoint.pt	results/Bengalese_Finches/hidden_size/hidden_size_16/Bird9/results_210603_122731/train_dur_600s/replicate_4/StandardizeSpect	0.02	1.736013937063663	Bird9	6	hidden_size	16	Bengalese Finch	without
938	min_segment_dur_majority_vote	0.984347609241486	0.3870967741935484	0.8791421506633003	0.39325876632157	600	5	TweetyNet	results/Bengalese_Finches/hidden_size/hidden_size_16/Bird9/results_210603_122731	results/Bengalese_Finches/hidden_size/hidden_size_16/Bird9/results_210603_122731/config_BirdsongRecognition_bird09.toml	data/BirdsongRecognition/Bird9/Wave_prep_210527_213350.csv	results/Bengalese_Finches/hidden_size/hidden_size_16/Bird9/results_210603_122731/train_dur_600s/replicate_5/TweetyNet/checkpoints/max-val-acc-checkpoint.pt	results/Bengalese_Finches/hidden_size/hidden_size_16/Bird9/results_210603_122731/train_dur_600s/replicate_5/StandardizeSpect	0.02	1.565239075851388	Bird9	6	hidden_size	16	Bengalese Finch	with
939	none	0.9830723810958748	4.967741935483871	0.8067711317064435	5.568936548714079	600	5	TweetyNet	results/Bengalese_Finches/hidden_size/hidden_size_16/Bird9/results_210603_122731	results/Bengalese_Finches/hidden_size/hidden_size_16/Bird9/results_210603_122731/config_BirdsongRecognition_bird09.toml	data/BirdsongRecognition/Bird9/Wave_prep_210527_213350.csv	results/Bengalese_Finches/hidden_size/hidden_size_16/Bird9/results_210603_122731/train_dur_600s/replicate_5/TweetyNet/checkpoints/max-val-acc-checkpoint.pt	results/Bengalese_Finches/hidden_size/hidden_size_16/Bird9/results_210603_122731/train_dur_600s/replicate_5/StandardizeSpect	0.02	1.6927618904125086	Bird9	6	hidden_size	16	Bengalese Finch	without
942	min_segment_dur_majority_vote	0.9844550608893802	0.1935483870967742	0.9022567835112948	0.20763442559195	600	6	TweetyNet	results/Bengalese_Finches/hidden_size/hidden_size_16/Bird9/results_210603_122731	results/Bengalese_Finches/hidden_size/hidden_size_16/Bird9/results_210603_122731/config_BirdsongRecognition_bird09.toml	data/BirdsongRecognition/Bird9/Wave_prep_210527_213350.csv	results/Bengalese_Finches/hidden_size/hidden_size_16/Bird9/results_210603_122731/train_dur_600s/replicate_6/TweetyNet/checkpoints/max-val-acc-checkpoint.pt	results/Bengalese_Finches/hidden_size/hidden_size_16/Bird9/results_210603_122731/train_dur_600s/replicate_6/StandardizeSpect	0.02	1.5544939110619826	Bird9	6	hidden_size	16	Bengalese Finch	with
943	none	0.9830772750113834	4.612903225806452	0.827764254342593	5.26451452591608	600	6	TweetyNet	results/Bengalese_Finches/hidden_size/hidden_size_16/Bird9/results_210603_122731	results/Bengalese_Finches/hidden_size/hidden_size_16/Bird9/results_210603_122731/config_BirdsongRecognition_bird09.toml	data/BirdsongRecognition/Bird9/Wave_prep_210527_213350.csv	results/Bengalese_Finches/hidden_size/hidden_size_16/Bird9/results_210603_122731/train_dur_600s/replicate_6/TweetyNet/checkpoints/max-val-acc-checkpoint.pt	results/Bengalese_Finches/hidden_size/hidden_size_16/Bird9/results_210603_122731/train_dur_600s/replicate_6/StandardizeSpect	0.02	1.6922724988616578	Bird9	6	hidden_size	16	Bengalese Finch	without
946	min_segment_dur_majority_vote	0.9844548839185602	0.2580645161290322	0.896775788473458	0.26602448672402	600	7	TweetyNet	results/Bengalese_Finches/hidden_size/hidden_size_16/Bird9/results_210603_122731	results/Bengalese_Finches/hidden_size/hidden_size_16/Bird9/results_210603_122731/config_BirdsongRecognition_bird09.toml	data/BirdsongRecognition/Bird9/Wave_prep_210527_213350.csv	results/Bengalese_Finches/hidden_size/hidden_size_16/Bird9/results_210603_122731/train_dur_600s/replicate_7/TweetyNet/checkpoints/max-val-acc-checkpoint.pt	results/Bengalese_Finches/hidden_size/hidden_size_16/Bird9/results_210603_122731/train_dur_600s/replicate_7/StandardizeSpect	0.02	1.5545116081439825	Bird9	6	hidden_size	16	Bengalese Finch	with
947	none	0.98311710203673	4.709677419354839	0.8235581882273867	5.43252005560953	600	7	TweetyNet	results/Bengalese_Finches/hidden_size/hidden_size_16/Bird9/results_210603_122731	results/Bengalese_Finches/hidden_size/hidden_size_16/Bird9/results_210603_122731/config_BirdsongRecognition_bird09.toml	data/BirdsongRecognition/Bird9/Wave_prep_210527_213350.csv	results/Bengalese_Finches/hidden_size/hidden_size_16/Bird9/results_210603_122731/train_dur_600s/replicate_7/TweetyNet/checkpoints/max-val-acc-checkpoint.pt	results/Bengalese_Finches/hidden_size/hidden_size_16/Bird9/results_210603_122731/train_dur_600s/replicate_7/StandardizeSpect	0.02	1.6882897963270027	Bird9	6	hidden_size	16	Bengalese Finch	without
950	min_segment_dur_majority_vote	0.983871112976642	0.3548387096774194	0.8774475398676752	0.37452007909058	600	8	TweetyNet	results/Bengalese_Finches/hidden_size/hidden_size_16/Bird9/results_210603_122731	results/Bengalese_Finches/hidden_size/hidden_size_16/Bird9/results_210603_122731/config_BirdsongRecognition_bird09.toml	data/BirdsongRecognition/Bird9/Wave_prep_210527_213350.csv	results/Bengalese_Finches/hidden_size/hidden_size_16/Bird9/results_210603_122731/train_dur_600s/replicate_8/TweetyNet/checkpoints/max-val-acc-checkpoint.pt	results/Bengalese_Finches/hidden_size/hidden_size_16/Bird9/results_210603_122731/train_dur_600s/replicate_8/StandardizeSpect	0.02	1.612888702335813	Bird9	6	hidden_size	16	Bengalese Finch	with
951	none	0.9827191738410936	5.290322580645161	0.8140970592530402	6.10566398742797	600	8	TweetyNet	results/Bengalese_Finches/hidden_size/hidden_size_16/Bird9/results_210603_122731	results/Bengalese_Finches/hidden_size/hidden_size_16/Bird9/results_210603_122731/config_BirdsongRecognition_bird09.toml	data/BirdsongRecognition/Bird9/Wave_prep_210527_213350.csv	results/Bengalese_Finches/hidden_size/hidden_size_16/Bird9/results_210603_122731/train_dur_600s/replicate_8/TweetyNet/checkpoints/max-val-acc-checkpoint.pt	results/Bengalese_Finches/hidden_size/hidden_size_16/Bird9/results_210603_122731/train_dur_600s/replicate_8/StandardizeSpect	0.02	1.728082615890636	Bird9	6	hidden_size	16	Bengalese Finch	without
954	min_segment_dur_majority_vote	0.9844849313267512	0.3870967741935484	0.8816053210123143	0.40681123404727	600	9	TweetyNet	results/Bengalese_Finches/hidden_size/hidden_size_16/Bird9/results_210603_122731	results/Bengalese_Finches/hidden_size/hidden_size_16/Bird9/results_210603_122731/config_BirdsongRecognition_bird09.toml	data/BirdsongRecognition/Bird9/Wave_prep_210527_213350.csv	results/Bengalese_Finches/hidden_size/hidden_size_16/Bird9/results_210603_122731/train_dur_600s/replicate_9/TweetyNet/checkpoints/max-val-acc-checkpoint.pt	results/Bengalese_Finches/hidden_size/hidden_size_16/Bird9/results_210603_122731/train_dur_600s/replicate_9/StandardizeSpect	0.02	1.55150686732487	Bird9	6	hidden_size	16	Bengalese Finch	with
955	none	0.9836437091678656	4.516129032258065	0.8327510894234007	5.03282752382688	600	9	TweetyNet	results/Bengalese_Finches/hidden_size/hidden_size_16/Bird9/results_210603_122731	results/Bengalese_Finches/hidden_size/hidden_size_16/Bird9/results_210603_122731/config_BirdsongRecognition_bird09.toml	data/BirdsongRecognition/Bird9/Wave_prep_210527_213350.csv	results/Bengalese_Finches/hidden_size/hidden_size_16/Bird9/results_210603_122731/train_dur_600s/replicate_9/TweetyNet/checkpoints/max-val-acc-checkpoint.pt	results/Bengalese_Finches/hidden_size/hidden_size_16/Bird9/results_210603_122731/train_dur_600s/replicate_9/StandardizeSpect	0.02	1.63562908321343	Bird9	6	hidden_size	16	Bengalese Finch	without
958	min_segment_dur_majority_vote	0.9840182447720204	0.3225806451612903	0.8916630124470202	0.33611762133328	600	10	TweetyNet	results/Bengalese_Finches/hidden_size/hidden_size_16/Bird9/results_210603_122731	results/Bengalese_Finches/hidden_size/hidden_size_16/Bird9/results_210603_122731/config_BirdsongRecognition_bird09.toml	data/BirdsongRecognition/Bird9/Wave_prep_210527_213350.csv	results/Bengalese_Finches/hidden_size/hidden_size_16/Bird9/results_210603_122731/train_dur_600s/replicate_10/TweetyNet/checkpoints/max-val-acc-checkpoint.pt	results/Bengalese_Finches/hidden_size/hidden_size_16/Bird9/results_210603_122731/train_dur_600s/replicate_10/StandardizeSpect	0.02	1.5981755227979622	Bird9	6	hidden_size	16	Bengalese Finch	with
959	none	0.9828884342733426	4.225806451612903	0.836092599236013	4.8156625225392	600	10	TweetyNet	results/Bengalese_Finches/hidden_size/hidden_size_16/Bird9/results_210603_122731	results/Bengalese_Finches/hidden_size/hidden_size_16/Bird9/results_210603_122731/config_BirdsongRecognition_bird09.toml	data/BirdsongRecognition/Bird9/Wave_prep_210527_213350.csv	results/Bengalese_Finches/hidden_size/hidden_size_16/Bird9/results_210603_122731/train_dur_600s/replicate_10/TweetyNet/checkpoints/max-val-acc-checkpoint.pt	results/Bengalese_Finches/hidden_size/hidden_size_16/Bird9/results_210603_122731/train_dur_600s/replicate_10/StandardizeSpect	0.02	1.7111565726657396	Bird9	6	hidden_size	16	Bengalese Finch	without
962	min_segment_dur_majority_vote	0.9849593199946184	0.2580645161290322	0.898584532931849	0.2648649306444	480	1	TweetyNet	results/Bengalese_Finches/hidden_size/hidden_size_16/Bird9/results_210603_122731	results/Bengalese_Finches/hidden_size/hidden_size_16/Bird9/results_210603_122731/config_BirdsongRecognition_bird09.toml	data/BirdsongRecognition/Bird9/Wave_prep_210527_213350.csv	results/Bengalese_Finches/hidden_size/hidden_size_16/Bird9/results_210603_122731/train_dur_480s/replicate_1/TweetyNet/checkpoints/max-val-acc-checkpoint.pt	results/Bengalese_Finches/hidden_size/hidden_size_16/Bird9/results_210603_122731/train_dur_480s/replicate_1/StandardizeSpect	0.02	1.5040680005381502	Bird9	5	hidden_size	16	Bengalese Finch	with
963	none	0.9837249769594808	4.612903225806452	0.8306423980978339	5.47782020367367	480	1	TweetyNet	results/Bengalese_Finches/hidden_size/hidden_size_16/Bird9/results_210603_122731	results/Bengalese_Finches/hidden_size/hidden_size_16/Bird9/results_210603_122731/config_BirdsongRecognition_bird09.toml	data/BirdsongRecognition/Bird9/Wave_prep_210527_213350.csv	results/Bengalese_Finches/hidden_size/hidden_size_16/Bird9/results_210603_122731/train_dur_480s/replicate_1/TweetyNet/checkpoints/max-val-acc-checkpoint.pt	results/Bengalese_Finches/hidden_size/hidden_size_16/Bird9/results_210603_122731/train_dur_480s/replicate_1/StandardizeSpect	0.02	1.62750230405192	Bird9	5	hidden_size	16	Bengalese Finch	without
966	min_segment_dur_majority_vote	0.984006269119148	0.4193548387096774	0.8750404320025135	0.4428654258417199	480	2	TweetyNet	results/Bengalese_Finches/hidden_size/hidden_size_16/Bird9/results_210603_122731	results/Bengalese_Finches/hidden_size/hidden_size_16/Bird9/results_210603_122731/config_BirdsongRecognition_bird09.toml	data/BirdsongRecognition/Bird9/Wave_prep_210527_213350.csv	results/Bengalese_Finches/hidden_size/hidden_size_16/Bird9/results_210603_122731/train_dur_480s/replicate_2/TweetyNet/checkpoints/max-val-acc-checkpoint.pt	results/Bengalese_Finches/hidden_size/hidden_size_16/Bird9/results_210603_122731/train_dur_480s/replicate_2/StandardizeSpect	0.02	1.5993730880851875	Bird9	5	hidden_size	16	Bengalese Finch	with
967	none	0.9832323691584764	4.161290322580645	0.829080138900811	4.65977937068709	480	2	TweetyNet	results/Bengalese_Finches/hidden_size/hidden_size_16/Bird9/results_210603_122731	results/Bengalese_Finches/hidden_size/hidden_size_16/Bird9/results_210603_122731/config_BirdsongRecognition_bird09.toml	data/BirdsongRecognition/Bird9/Wave_prep_210527_213350.csv	results/Bengalese_Finches/hidden_size/hidden_size_16/Bird9/results_210603_122731/train_dur_480s/replicate_2/TweetyNet/checkpoints/max-val-acc-checkpoint.pt	results/Bengalese_Finches/hidden_size/hidden_size_16/Bird9/results_210603_122731/train_dur_480s/replicate_2/StandardizeSpect	0.02	1.676763084152355	Bird9	5	hidden_size	16	Bengalese Finch	without
970	min_segment_dur_majority_vote	0.983658462146648	0.3225806451612903	0.8849373869573889	0.3482601344754	480	3	TweetyNet	results/Bengalese_Finches/hidden_size/hidden_size_16/Bird9/results_210603_122731	results/Bengalese_Finches/hidden_size/hidden_size_16/Bird9/results_210603_122731/config_BirdsongRecognition_bird09.toml	data/BirdsongRecognition/Bird9/Wave_prep_210527_213350.csv	results/Bengalese_Finches/hidden_size/hidden_size_16/Bird9/results_210603_122731/train_dur_480s/replicate_3/TweetyNet/checkpoints/max-val-acc-checkpoint.pt	results/Bengalese_Finches/hidden_size/hidden_size_16/Bird9/results_210603_122731/train_dur_480s/replicate_3/StandardizeSpect	0.02	1.6341537853351906	Bird9	5	hidden_size	16	Bengalese Finch	with
971	none	0.9826301209609912	4.419354838709677	0.8288695192453348	4.915874030580429	480	3	TweetyNet	results/Bengalese_Finches/hidden_size/hidden_size_16/Bird9/results_210603_122731	results/Bengalese_Finches/hidden_size/hidden_size_16/Bird9/results_210603_122731/config_BirdsongRecognition_bird09.toml	data/BirdsongRecognition/Bird9/Wave_prep_210527_213350.csv	results/Bengalese_Finches/hidden_size/hidden_size_16/Bird9/results_210603_122731/train_dur_480s/replicate_3/TweetyNet/checkpoints/max-val-acc-checkpoint.pt	results/Bengalese_Finches/hidden_size/hidden_size_16/Bird9/results_210603_122731/train_dur_480s/replicate_3/StandardizeSpect	0.02	1.7369879039008884	Bird9	5	hidden_size	16	Bengalese Finch	without
974	min_segment_dur_majority_vote	0.98416384777259	0.3225806451612903	0.8884909580533632	0.33867778518377	480	4	TweetyNet	results/Bengalese_Finches/hidden_size/hidden_size_16/Bird9/results_210603_122731	results/Bengalese_Finches/hidden_size/hidden_size_16/Bird9/results_210603_122731/config_BirdsongRecognition_bird09.toml	data/BirdsongRecognition/Bird9/Wave_prep_210527_213350.csv	results/Bengalese_Finches/hidden_size/hidden_size_16/Bird9/results_210603_122731/train_dur_480s/replicate_4/TweetyNet/checkpoints/max-val-acc-checkpoint.pt	results/Bengalese_Finches/hidden_size/hidden_size_16/Bird9/results_210603_122731/train_dur_480s/replicate_4/StandardizeSpect	0.02	1.583615222740986	Bird9	5	hidden_size	16	Bengalese Finch	with
975	none	0.9829127018400168	5.516129032258065	0.826873161625927	6.27545538882657	480	4	TweetyNet	results/Bengalese_Finches/hidden_size/hidden_size_16/Bird9/results_210603_122731	results/Bengalese_Finches/hidden_size/hidden_size_16/Bird9/results_210603_122731/config_BirdsongRecognition_bird09.toml	data/BirdsongRecognition/Bird9/Wave_prep_210527_213350.csv	results/Bengalese_Finches/hidden_size/hidden_size_16/Bird9/results_210603_122731/train_dur_480s/replicate_4/TweetyNet/checkpoints/max-val-acc-checkpoint.pt	results/Bengalese_Finches/hidden_size/hidden_size_16/Bird9/results_210603_122731/train_dur_480s/replicate_4/StandardizeSpect	0.02	1.7087298159983222	Bird9	5	hidden_size	16	Bengalese Finch	without
978	min_segment_dur_majority_vote	0.9834582515480936	0.2903225806451613	0.8935997728156796	0.33532921173076	480	5	TweetyNet	results/Bengalese_Finches/hidden_size/hidden_size_16/Bird9/results_210603_122731	results/Bengalese_Finches/hidden_size/hidden_size_16/Bird9/results_210603_122731/config_BirdsongRecognition_bird09.toml	data/BirdsongRecognition/Bird9/Wave_prep_210527_213350.csv	results/Bengalese_Finches/hidden_size/hidden_size_16/Bird9/results_210603_122731/train_dur_480s/replicate_5/TweetyNet/checkpoints/max-val-acc-checkpoint.pt	results/Bengalese_Finches/hidden_size/hidden_size_16/Bird9/results_210603_122731/train_dur_480s/replicate_5/StandardizeSpect	0.02	1.6541748451906368	Bird9	5	hidden_size	16	Bengalese Finch	with
979	none	0.982213097970996	4.516129032258065	0.8280970377169268	5.21638293050428	480	5	TweetyNet	results/Bengalese_Finches/hidden_size/hidden_size_16/Bird9/results_210603_122731	results/Bengalese_Finches/hidden_size/hidden_size_16/Bird9/results_210603_122731/config_BirdsongRecognition_bird09.toml	data/BirdsongRecognition/Bird9/Wave_prep_210527_213350.csv	results/Bengalese_Finches/hidden_size/hidden_size_16/Bird9/results_210603_122731/train_dur_480s/replicate_5/TweetyNet/checkpoints/max-val-acc-checkpoint.pt	results/Bengalese_Finches/hidden_size/hidden_size_16/Bird9/results_210603_122731/train_dur_480s/replicate_5/StandardizeSpect	0.02	1.7786902029004017	Bird9	5	hidden_size	16	Bengalese Finch	without
982	min_segment_dur_majority_vote	0.9840179104489656	0.5161290322580645	0.8707445964686055	0.54320757857398	480	6	TweetyNet	results/Bengalese_Finches/hidden_size/hidden_size_16/Bird9/results_210603_122731	results/Bengalese_Finches/hidden_size/hidden_size_16/Bird9/results_210603_122731/config_BirdsongRecognition_bird09.toml	data/BirdsongRecognition/Bird9/Wave_prep_210527_213350.csv	results/Bengalese_Finches/hidden_size/hidden_size_16/Bird9/results_210603_122731/train_dur_480s/replicate_6/TweetyNet/checkpoints/max-val-acc-checkpoint.pt	results/Bengalese_Finches/hidden_size/hidden_size_16/Bird9/results_210603_122731/train_dur_480s/replicate_6/StandardizeSpect	0.02	1.5982089551034415	Bird9	5	hidden_size	16	Bengalese Finch	with
983	none	0.9823638975493688	7.032258064516129	0.7868556121634576	8.00143280187544	480	6	TweetyNet	results/Bengalese_Finches/hidden_size/hidden_size_16/Bird9/results_210603_122731	results/Bengalese_Finches/hidden_size/hidden_size_16/Bird9/results_210603_122731/config_BirdsongRecognition_bird09.toml	data/BirdsongRecognition/Bird9/Wave_prep_210527_213350.csv	results/Bengalese_Finches/hidden_size/hidden_size_16/Bird9/results_210603_122731/train_dur_480s/replicate_6/TweetyNet/checkpoints/max-val-acc-checkpoint.pt	results/Bengalese_Finches/hidden_size/hidden_size_16/Bird9/results_210603_122731/train_dur_480s/replicate_6/StandardizeSpect	0.02	1.7636102450631297	Bird9	5	hidden_size	16	Bengalese Finch	without
986	min_segment_dur_majority_vote	0.9839973970532656	0.3870967741935484	0.8907386496517127	0.4023911838696299	480	7	TweetyNet	results/Bengalese_Finches/hidden_size/hidden_size_16/Bird9/results_210603_122731	results/Bengalese_Finches/hidden_size/hidden_size_16/Bird9/results_210603_122731/config_BirdsongRecognition_bird09.toml	data/BirdsongRecognition/Bird9/Wave_prep_210527_213350.csv	results/Bengalese_Finches/hidden_size/hidden_size_16/Bird9/results_210603_122731/train_dur_480s/replicate_7/TweetyNet/checkpoints/max-val-acc-checkpoint.pt	results/Bengalese_Finches/hidden_size/hidden_size_16/Bird9/results_210603_122731/train_dur_480s/replicate_7/StandardizeSpect	0.02	1.600260294673428	Bird9	5	hidden_size	16	Bengalese Finch	with
987	none	0.9824944737428476	6.580645161290323	0.8159578351194949	7.20443703934848	480	7	TweetyNet	results/Bengalese_Finches/hidden_size/hidden_size_16/Bird9/results_210603_122731	results/Bengalese_Finches/hidden_size/hidden_size_16/Bird9/results_210603_122731/config_BirdsongRecognition_bird09.toml	data/BirdsongRecognition/Bird9/Wave_prep_210527_213350.csv	results/Bengalese_Finches/hidden_size/hidden_size_16/Bird9/results_210603_122731/train_dur_480s/replicate_7/TweetyNet/checkpoints/max-val-acc-checkpoint.pt	results/Bengalese_Finches/hidden_size/hidden_size_16/Bird9/results_210603_122731/train_dur_480s/replicate_7/StandardizeSpect	0.02	1.7505526257152404	Bird9	5	hidden_size	16	Bengalese Finch	without
990	min_segment_dur_majority_vote	0.9844388565806382	0.3870967741935484	0.8781657010368282	0.4059386806648	480	8	TweetyNet	results/Bengalese_Finches/hidden_size/hidden_size_16/Bird9/results_210603_122731	results/Bengalese_Finches/hidden_size/hidden_size_16/Bird9/results_210603_122731/config_BirdsongRecognition_bird09.toml	data/BirdsongRecognition/Bird9/Wave_prep_210527_213350.csv	results/Bengalese_Finches/hidden_size/hidden_size_16/Bird9/results_210603_122731/train_dur_480s/replicate_8/TweetyNet/checkpoints/max-val-acc-checkpoint.pt	results/Bengalese_Finches/hidden_size/hidden_size_16/Bird9/results_210603_122731/train_dur_480s/replicate_8/StandardizeSpect	0.02	1.5561143419361767	Bird9	5	hidden_size	16	Bengalese Finch	with
991	none	0.983751770488156	4.290322580645161	0.8381814097038749	4.73433677892894	480	8	TweetyNet	results/Bengalese_Finches/hidden_size/hidden_size_16/Bird9/results_210603_122731	results/Bengalese_Finches/hidden_size/hidden_size_16/Bird9/results_210603_122731/config_BirdsongRecognition_bird09.toml	data/BirdsongRecognition/Bird9/Wave_prep_210527_213350.csv	results/Bengalese_Finches/hidden_size/hidden_size_16/Bird9/results_210603_122731/train_dur_480s/replicate_8/TweetyNet/checkpoints/max-val-acc-checkpoint.pt	results/Bengalese_Finches/hidden_size/hidden_size_16/Bird9/results_210603_122731/train_dur_480s/replicate_8/StandardizeSpect	0.02	1.6248229511843904	Bird9	5	hidden_size	16	Bengalese Finch	without
994	min_segment_dur_majority_vote	0.983338943109162	0.4193548387096774	0.8650898712082296	0.4509068873509499	480	9	TweetyNet	results/Bengalese_Finches/hidden_size/hidden_size_16/Bird9/results_210603_122731	results/Bengalese_Finches/hidden_size/hidden_size_16/Bird9/results_210603_122731/config_BirdsongRecognition_bird09.toml	data/BirdsongRecognition/Bird9/Wave_prep_210527_213350.csv	results/Bengalese_Finches/hidden_size/hidden_size_16/Bird9/results_210603_122731/train_dur_480s/replicate_9/TweetyNet/checkpoints/max-val-acc-checkpoint.pt	results/Bengalese_Finches/hidden_size/hidden_size_16/Bird9/results_210603_122731/train_dur_480s/replicate_9/StandardizeSpect	0.02	1.6661056890838075	Bird9	5	hidden_size	16	Bengalese Finch	with
995	none	0.9821436902507856	6.709677419354839	0.8057549581802327	7.4692922873223	480	9	TweetyNet	results/Bengalese_Finches/hidden_size/hidden_size_16/Bird9/results_210603_122731	results/Bengalese_Finches/hidden_size/hidden_size_16/Bird9/results_210603_122731/config_BirdsongRecognition_bird09.toml	data/BirdsongRecognition/Bird9/Wave_prep_210527_213350.csv	results/Bengalese_Finches/hidden_size/hidden_size_16/Bird9/results_210603_122731/train_dur_480s/replicate_9/TweetyNet/checkpoints/max-val-acc-checkpoint.pt	results/Bengalese_Finches/hidden_size/hidden_size_16/Bird9/results_210603_122731/train_dur_480s/replicate_9/StandardizeSpect	0.02	1.7856309749214372	Bird9	5	hidden_size	16	Bengalese Finch	without
998	min_segment_dur_majority_vote	0.9842230646929828	0.2903225806451613	0.8879631737432954	0.3007993262081	480	10	TweetyNet	results/Bengalese_Finches/hidden_size/hidden_size_16/Bird9/results_210603_122731	results/Bengalese_Finches/hidden_size/hidden_size_16/Bird9/results_210603_122731/config_BirdsongRecognition_bird09.toml	data/BirdsongRecognition/Bird9/Wave_prep_210527_213350.csv	results/Bengalese_Finches/hidden_size/hidden_size_16/Bird9/results_210603_122731/train_dur_480s/replicate_10/TweetyNet/checkpoints/max-val-acc-checkpoint.pt	results/Bengalese_Finches/hidden_size/hidden_size_16/Bird9/results_210603_122731/train_dur_480s/replicate_10/StandardizeSpect	0.02	1.577693530701718	Bird9	5	hidden_size	16	Bengalese Finch	with
999	none	0.9826810216792432	5.387096774193548	0.8081075139678345	6.2627009229592	480	10	TweetyNet	results/Bengalese_Finches/hidden_size/hidden_size_16/Bird9/results_210603_122731	results/Bengalese_Finches/hidden_size/hidden_size_16/Bird9/results_210603_122731/config_BirdsongRecognition_bird09.toml	data/BirdsongRecognition/Bird9/Wave_prep_210527_213350.csv	results/Bengalese_Finches/hidden_size/hidden_size_16/Bird9/results_210603_122731/train_dur_480s/replicate_10/TweetyNet/checkpoints/max-val-acc-checkpoint.pt	results/Bengalese_Finches/hidden_size/hidden_size_16/Bird9/results_210603_122731/train_dur_480s/replicate_10/StandardizeSpect	0.02	1.7318978320756684	Bird9	5	hidden_size	16	Bengalese Finch	without
1002	min_segment_dur_majority_vote	0.9679358552566364	2.4838709677419355	0.6609895021119169	2.7610226497831203	30	1	TweetyNet	results/Bengalese_Finches/hidden_size/hidden_size_16/Bird9/results_210603_122731	results/Bengalese_Finches/hidden_size/hidden_size_16/Bird9/results_210603_122731/config_BirdsongRecognition_bird09.toml	data/BirdsongRecognition/Bird9/Wave_prep_210527_213350.csv	results/Bengalese_Finches/hidden_size/hidden_size_16/Bird9/results_210603_122731/train_dur_30s/replicate_1/TweetyNet/checkpoints/max-val-acc-checkpoint.pt	results/Bengalese_Finches/hidden_size/hidden_size_16/Bird9/results_210603_122731/train_dur_30s/replicate_1/StandardizeSpect	0.02	3.206414474336372	Bird9	0	hidden_size	16	Bengalese Finch	with
1003	none	0.9609594658314176	32.38709677419355	0.5284827391734471	35.90668787160396	30	1	TweetyNet	results/Bengalese_Finches/hidden_size/hidden_size_16/Bird9/results_210603_122731	results/Bengalese_Finches/hidden_size/hidden_size_16/Bird9/results_210603_122731/config_BirdsongRecognition_bird09.toml	data/BirdsongRecognition/Bird9/Wave_prep_210527_213350.csv	results/Bengalese_Finches/hidden_size/hidden_size_16/Bird9/results_210603_122731/train_dur_30s/replicate_1/TweetyNet/checkpoints/max-val-acc-checkpoint.pt	results/Bengalese_Finches/hidden_size/hidden_size_16/Bird9/results_210603_122731/train_dur_30s/replicate_1/StandardizeSpect	0.02	3.904053416858233	Bird9	0	hidden_size	16	Bengalese Finch	without
1006	min_segment_dur_majority_vote	0.9779937645729226	0.7419354838709677	0.7983223620312934	0.80151382439797	30	2	TweetyNet	results/Bengalese_Finches/hidden_size/hidden_size_16/Bird9/results_210603_122731	results/Bengalese_Finches/hidden_size/hidden_size_16/Bird9/results_210603_122731/config_BirdsongRecognition_bird09.toml	data/BirdsongRecognition/Bird9/Wave_prep_210527_213350.csv	results/Bengalese_Finches/hidden_size/hidden_size_16/Bird9/results_210603_122731/train_dur_30s/replicate_2/TweetyNet/checkpoints/max-val-acc-checkpoint.pt	results/Bengalese_Finches/hidden_size/hidden_size_16/Bird9/results_210603_122731/train_dur_30s/replicate_2/StandardizeSpect	0.02	2.200623542707736	Bird9	0	hidden_size	16	Bengalese Finch	with
1007	none	0.9756580353233948	12.67741935483871	0.7205649558430988	14.274876186108129	30	2	TweetyNet	results/Bengalese_Finches/hidden_size/hidden_size_16/Bird9/results_210603_122731	results/Bengalese_Finches/hidden_size/hidden_size_16/Bird9/results_210603_122731/config_BirdsongRecognition_bird09.toml	data/BirdsongRecognition/Bird9/Wave_prep_210527_213350.csv	results/Bengalese_Finches/hidden_size/hidden_size_16/Bird9/results_210603_122731/train_dur_30s/replicate_2/TweetyNet/checkpoints/max-val-acc-checkpoint.pt	results/Bengalese_Finches/hidden_size/hidden_size_16/Bird9/results_210603_122731/train_dur_30s/replicate_2/StandardizeSpect	0.02	2.434196467660521	Bird9	0	hidden_size	16	Bengalese Finch	without
1010	min_segment_dur_majority_vote	0.9732309436350388	1.3870967741935485	0.7027455307768404	1.59677568010405	30	3	TweetyNet	results/Bengalese_Finches/hidden_size/hidden_size_16/Bird9/results_210603_122731	results/Bengalese_Finches/hidden_size/hidden_size_16/Bird9/results_210603_122731/config_BirdsongRecognition_bird09.toml	data/BirdsongRecognition/Bird9/Wave_prep_210527_213350.csv	results/Bengalese_Finches/hidden_size/hidden_size_16/Bird9/results_210603_122731/train_dur_30s/replicate_3/TweetyNet/checkpoints/max-val-acc-checkpoint.pt	results/Bengalese_Finches/hidden_size/hidden_size_16/Bird9/results_210603_122731/train_dur_30s/replicate_3/StandardizeSpect	0.02	2.6769056364961075	Bird9	0	hidden_size	16	Bengalese Finch	with
1011	none	0.9655598556056296	32.58064516129032	0.5526482012151529	37.15384784171586	30	3	TweetyNet	results/Bengalese_Finches/hidden_size/hidden_size_16/Bird9/results_210603_122731	results/Bengalese_Finches/hidden_size/hidden_size_16/Bird9/results_210603_122731/config_BirdsongRecognition_bird09.toml	data/BirdsongRecognition/Bird9/Wave_prep_210527_213350.csv	results/Bengalese_Finches/hidden_size/hidden_size_16/Bird9/results_210603_122731/train_dur_30s/replicate_3/TweetyNet/checkpoints/max-val-acc-checkpoint.pt	results/Bengalese_Finches/hidden_size/hidden_size_16/Bird9/results_210603_122731/train_dur_30s/replicate_3/StandardizeSpect	0.02	3.4440144394370265	Bird9	0	hidden_size	16	Bengalese Finch	without
1014	min_segment_dur_majority_vote	0.9670457144567974	2.129032258064516	0.6653624905261786	2.45603564243388	30	4	TweetyNet	results/Bengalese_Finches/hidden_size/hidden_size_16/Bird9/results_210603_122731	results/Bengalese_Finches/hidden_size/hidden_size_16/Bird9/results_210603_122731/config_BirdsongRecognition_bird09.toml	data/BirdsongRecognition/Bird9/Wave_prep_210527_213350.csv	results/Bengalese_Finches/hidden_size/hidden_size_16/Bird9/results_210603_122731/train_dur_30s/replicate_4/TweetyNet/checkpoints/max-val-acc-checkpoint.pt	results/Bengalese_Finches/hidden_size/hidden_size_16/Bird9/results_210603_122731/train_dur_30s/replicate_4/StandardizeSpect	0.02	3.2954285543202566	Bird9	0	hidden_size	16	Bengalese Finch	with
1015	none	0.9583982864193656	35.58064516129032	0.5190260207883236	39.99740920926916	30	4	TweetyNet	results/Bengalese_Finches/hidden_size/hidden_size_16/Bird9/results_210603_122731	results/Bengalese_Finches/hidden_size/hidden_size_16/Bird9/results_210603_122731/config_BirdsongRecognition_bird09.toml	data/BirdsongRecognition/Bird9/Wave_prep_210527_213350.csv	results/Bengalese_Finches/hidden_size/hidden_size_16/Bird9/results_210603_122731/train_dur_30s/replicate_4/TweetyNet/checkpoints/max-val-acc-checkpoint.pt	results/Bengalese_Finches/hidden_size/hidden_size_16/Bird9/results_210603_122731/train_dur_30s/replicate_4/StandardizeSpect	0.02	4.160171358063436	Bird9	0	hidden_size	16	Bengalese Finch	without
1018	min_segment_dur_majority_vote	0.9792009870735484	0.8064516129032258	0.8071914606524253	0.92710665387814	30	5	TweetyNet	results/Bengalese_Finches/hidden_size/hidden_size_16/Bird9/results_210603_122731	results/Bengalese_Finches/hidden_size/hidden_size_16/Bird9/results_210603_122731/config_BirdsongRecognition_bird09.toml	data/BirdsongRecognition/Bird9/Wave_prep_210527_213350.csv	results/Bengalese_Finches/hidden_size/hidden_size_16/Bird9/results_210603_122731/train_dur_30s/replicate_5/TweetyNet/checkpoints/max-val-acc-checkpoint.pt	results/Bengalese_Finches/hidden_size/hidden_size_16/Bird9/results_210603_122731/train_dur_30s/replicate_5/StandardizeSpect	0.02	2.07990129264517	Bird9	0	hidden_size	16	Bengalese Finch	with
1019	none	0.9753573744332592	16.258064516129032	0.6782459444127461	18.571113366193888	30	5	TweetyNet	results/Bengalese_Finches/hidden_size/hidden_size_16/Bird9/results_210603_122731	results/Bengalese_Finches/hidden_size/hidden_size_16/Bird9/results_210603_122731/config_BirdsongRecognition_bird09.toml	data/BirdsongRecognition/Bird9/Wave_prep_210527_213350.csv	results/Bengalese_Finches/hidden_size/hidden_size_16/Bird9/results_210603_122731/train_dur_30s/replicate_5/TweetyNet/checkpoints/max-val-acc-checkpoint.pt	results/Bengalese_Finches/hidden_size/hidden_size_16/Bird9/results_210603_122731/train_dur_30s/replicate_5/StandardizeSpect	0.02	2.4642625566740683	Bird9	0	hidden_size	16	Bengalese Finch	without
1022	min_segment_dur_majority_vote	0.973986100034859	1.7096774193548387	0.6968916913150349	2.0474641778191	30	6	TweetyNet	results/Bengalese_Finches/hidden_size/hidden_size_16/Bird9/results_210603_122731	results/Bengalese_Finches/hidden_size/hidden_size_16/Bird9/results_210603_122731/config_BirdsongRecognition_bird09.toml	data/BirdsongRecognition/Bird9/Wave_prep_210527_213350.csv	results/Bengalese_Finches/hidden_size/hidden_size_16/Bird9/results_210603_122731/train_dur_30s/replicate_6/TweetyNet/checkpoints/max-val-acc-checkpoint.pt	results/Bengalese_Finches/hidden_size/hidden_size_16/Bird9/results_210603_122731/train_dur_30s/replicate_6/StandardizeSpect	0.02	2.601389996514103	Bird9	0	hidden_size	16	Bengalese Finch	with
1023	none	0.9705270902652636	20.83870967741936	0.6015552636633612	23.4317615663738	30	6	TweetyNet	results/Bengalese_Finches/hidden_size/hidden_size_16/Bird9/results_210603_122731	results/Bengalese_Finches/hidden_size/hidden_size_16/Bird9/results_210603_122731/config_BirdsongRecognition_bird09.toml	data/BirdsongRecognition/Bird9/Wave_prep_210527_213350.csv	results/Bengalese_Finches/hidden_size/hidden_size_16/Bird9/results_210603_122731/train_dur_30s/replicate_6/TweetyNet/checkpoints/max-val-acc-checkpoint.pt	results/Bengalese_Finches/hidden_size/hidden_size_16/Bird9/results_210603_122731/train_dur_30s/replicate_6/StandardizeSpect	0.02	2.947290973473637	Bird9	0	hidden_size	16	Bengalese Finch	without
1026	min_segment_dur_majority_vote	0.9768776166212828	1.0	0.7806640059354747	1.10007362045943	30	7	TweetyNet	results/Bengalese_Finches/hidden_size/hidden_size_16/Bird9/results_210603_122731	results/Bengalese_Finches/hidden_size/hidden_size_16/Bird9/results_210603_122731/config_BirdsongRecognition_bird09.toml	data/BirdsongRecognition/Bird9/Wave_prep_210527_213350.csv	results/Bengalese_Finches/hidden_size/hidden_size_16/Bird9/results_210603_122731/train_dur_30s/replicate_7/TweetyNet/checkpoints/max-val-acc-checkpoint.pt	results/Bengalese_Finches/hidden_size/hidden_size_16/Bird9/results_210603_122731/train_dur_30s/replicate_7/StandardizeSpect	0.02	2.3122383378717304	Bird9	0	hidden_size	16	Bengalese Finch	with
1027	none	0.9715831026664292	23.32258064516129	0.6327295445179932	25.959068614443108	30	7	TweetyNet	results/Bengalese_Finches/hidden_size/hidden_size_16/Bird9/results_210603_122731	results/Bengalese_Finches/hidden_size/hidden_size_16/Bird9/results_210603_122731/config_BirdsongRecognition_bird09.toml	data/BirdsongRecognition/Bird9/Wave_prep_210527_213350.csv	results/Bengalese_Finches/hidden_size/hidden_size_16/Bird9/results_210603_122731/train_dur_30s/replicate_7/TweetyNet/checkpoints/max-val-acc-checkpoint.pt	results/Bengalese_Finches/hidden_size/hidden_size_16/Bird9/results_210603_122731/train_dur_30s/replicate_7/StandardizeSpect	0.02	2.841689733357089	Bird9	0	hidden_size	16	Bengalese Finch	without
1030	min_segment_dur_majority_vote	0.9762396597317874	1.0	0.7691960372791817	1.18690880416019	30	8	TweetyNet	results/Bengalese_Finches/hidden_size/hidden_size_16/Bird9/results_210603_122731	results/Bengalese_Finches/hidden_size/hidden_size_16/Bird9/results_210603_122731/config_BirdsongRecognition_bird09.toml	data/BirdsongRecognition/Bird9/Wave_prep_210527_213350.csv	results/Bengalese_Finches/hidden_size/hidden_size_16/Bird9/results_210603_122731/train_dur_30s/replicate_8/TweetyNet/checkpoints/max-val-acc-checkpoint.pt	results/Bengalese_Finches/hidden_size/hidden_size_16/Bird9/results_210603_122731/train_dur_30s/replicate_8/StandardizeSpect	0.02	2.376034026821261	Bird9	0	hidden_size	16	Bengalese Finch	with
1031	none	0.9705699145890068	25.12903225806452	0.6334289329387761	28.42359765664947	30	8	TweetyNet	results/Bengalese_Finches/hidden_size/hidden_size_16/Bird9/results_210603_122731	results/Bengalese_Finches/hidden_size/hidden_size_16/Bird9/results_210603_122731/config_BirdsongRecognition_bird09.toml	data/BirdsongRecognition/Bird9/Wave_prep_210527_213350.csv	results/Bengalese_Finches/hidden_size/hidden_size_16/Bird9/results_210603_122731/train_dur_30s/replicate_8/TweetyNet/checkpoints/max-val-acc-checkpoint.pt	results/Bengalese_Finches/hidden_size/hidden_size_16/Bird9/results_210603_122731/train_dur_30s/replicate_8/StandardizeSpect	0.02	2.9430085410993123	Bird9	0	hidden_size	16	Bengalese Finch	without
1034	min_segment_dur_majority_vote	0.976661471043562	0.967741935483871	0.7770427959153656	1.06379672044565	30	9	TweetyNet	results/Bengalese_Finches/hidden_size/hidden_size_16/Bird9/results_210603_122731	results/Bengalese_Finches/hidden_size/hidden_size_16/Bird9/results_210603_122731/config_BirdsongRecognition_bird09.toml	data/BirdsongRecognition/Bird9/Wave_prep_210527_213350.csv	results/Bengalese_Finches/hidden_size/hidden_size_16/Bird9/results_210603_122731/train_dur_30s/replicate_9/TweetyNet/checkpoints/max-val-acc-checkpoint.pt	results/Bengalese_Finches/hidden_size/hidden_size_16/Bird9/results_210603_122731/train_dur_30s/replicate_9/StandardizeSpect	0.02	2.3338528956438065	Bird9	0	hidden_size	16	Bengalese Finch	with
1035	none	0.9712001210907896	22.83870967741936	0.6278518843679702	25.22746182068813	30	9	TweetyNet	results/Bengalese_Finches/hidden_size/hidden_size_16/Bird9/results_210603_122731	results/Bengalese_Finches/hidden_size/hidden_size_16/Bird9/results_210603_122731/config_BirdsongRecognition_bird09.toml	data/BirdsongRecognition/Bird9/Wave_prep_210527_213350.csv	results/Bengalese_Finches/hidden_size/hidden_size_16/Bird9/results_210603_122731/train_dur_30s/replicate_9/TweetyNet/checkpoints/max-val-acc-checkpoint.pt	results/Bengalese_Finches/hidden_size/hidden_size_16/Bird9/results_210603_122731/train_dur_30s/replicate_9/StandardizeSpect	0.02	2.879987890921032	Bird9	0	hidden_size	16	Bengalese Finch	without
1038	min_segment_dur_majority_vote	0.9790437591782284	0.8387096774193549	0.8270244954485951	0.95665925660615	30	10	TweetyNet	results/Bengalese_Finches/hidden_size/hidden_size_16/Bird9/results_210603_122731	results/Bengalese_Finches/hidden_size/hidden_size_16/Bird9/results_210603_122731/config_BirdsongRecognition_bird09.toml	data/BirdsongRecognition/Bird9/Wave_prep_210527_213350.csv	results/Bengalese_Finches/hidden_size/hidden_size_16/Bird9/results_210603_122731/train_dur_30s/replicate_10/TweetyNet/checkpoints/max-val-acc-checkpoint.pt	results/Bengalese_Finches/hidden_size/hidden_size_16/Bird9/results_210603_122731/train_dur_30s/replicate_10/StandardizeSpect	0.02	2.09562408217715	Bird9	0	hidden_size	16	Bengalese Finch	with
1039	none	0.9747918526290588	18.483870967741936	0.6828120736866319	20.42570045860177	30	10	TweetyNet	results/Bengalese_Finches/hidden_size/hidden_size_16/Bird9/results_210603_122731	results/Bengalese_Finches/hidden_size/hidden_size_16/Bird9/results_210603_122731/config_BirdsongRecognition_bird09.toml	data/BirdsongRecognition/Bird9/Wave_prep_210527_213350.csv	results/Bengalese_Finches/hidden_size/hidden_size_16/Bird9/results_210603_122731/train_dur_30s/replicate_10/TweetyNet/checkpoints/max-val-acc-checkpoint.pt	results/Bengalese_Finches/hidden_size/hidden_size_16/Bird9/results_210603_122731/train_dur_30s/replicate_10/StandardizeSpect	0.02	2.520814737094124	Bird9	0	hidden_size	16	Bengalese Finch	without
1042	min_segment_dur_majority_vote	0.9825550740874268	0.4838709677419355	0.8672508643479723	0.53771497700534	180	1	TweetyNet	results/Bengalese_Finches/hidden_size/hidden_size_16/Bird9/results_210603_122731	results/Bengalese_Finches/hidden_size/hidden_size_16/Bird9/results_210603_122731/config_BirdsongRecognition_bird09.toml	data/BirdsongRecognition/Bird9/Wave_prep_210527_213350.csv	results/Bengalese_Finches/hidden_size/hidden_size_16/Bird9/results_210603_122731/train_dur_180s/replicate_1/TweetyNet/checkpoints/max-val-acc-checkpoint.pt	results/Bengalese_Finches/hidden_size/hidden_size_16/Bird9/results_210603_122731/train_dur_180s/replicate_1/StandardizeSpect	0.02	1.7444925912573184	Bird9	4	hidden_size	16	Bengalese Finch	with
1043	none	0.981327857508132	6.096774193548387	0.8090882984934502	6.693685668122599	180	1	TweetyNet	results/Bengalese_Finches/hidden_size/hidden_size_16/Bird9/results_210603_122731	results/Bengalese_Finches/hidden_size/hidden_size_16/Bird9/results_210603_122731/config_BirdsongRecognition_bird09.toml	data/BirdsongRecognition/Bird9/Wave_prep_210527_213350.csv	results/Bengalese_Finches/hidden_size/hidden_size_16/Bird9/results_210603_122731/train_dur_180s/replicate_1/TweetyNet/checkpoints/max-val-acc-checkpoint.pt	results/Bengalese_Finches/hidden_size/hidden_size_16/Bird9/results_210603_122731/train_dur_180s/replicate_1/StandardizeSpect	0.02	1.867214249186788	Bird9	4	hidden_size	16	Bengalese Finch	without
1046	min_segment_dur_majority_vote	0.9834718028135112	0.3548387096774194	0.8854581413900191	0.39072496125325	180	2	TweetyNet	results/Bengalese_Finches/hidden_size/hidden_size_16/Bird9/results_210603_122731	results/Bengalese_Finches/hidden_size/hidden_size_16/Bird9/results_210603_122731/config_BirdsongRecognition_bird09.toml	data/BirdsongRecognition/Bird9/Wave_prep_210527_213350.csv	results/Bengalese_Finches/hidden_size/hidden_size_16/Bird9/results_210603_122731/train_dur_180s/replicate_2/TweetyNet/checkpoints/max-val-acc-checkpoint.pt	results/Bengalese_Finches/hidden_size/hidden_size_16/Bird9/results_210603_122731/train_dur_180s/replicate_2/StandardizeSpect	0.02	1.652819718648879	Bird9	4	hidden_size	16	Bengalese Finch	with
1047	none	0.9817002628661908	6.580645161290323	0.7982842465151655	7.70691657910723	180	2	TweetyNet	results/Bengalese_Finches/hidden_size/hidden_size_16/Bird9/results_210603_122731	results/Bengalese_Finches/hidden_size/hidden_size_16/Bird9/results_210603_122731/config_BirdsongRecognition_bird09.toml	data/BirdsongRecognition/Bird9/Wave_prep_210527_213350.csv	results/Bengalese_Finches/hidden_size/hidden_size_16/Bird9/results_210603_122731/train_dur_180s/replicate_2/TweetyNet/checkpoints/max-val-acc-checkpoint.pt	results/Bengalese_Finches/hidden_size/hidden_size_16/Bird9/results_210603_122731/train_dur_180s/replicate_2/StandardizeSpect	0.02	1.829973713380928	Bird9	4	hidden_size	16	Bengalese Finch	without
1050	min_segment_dur_majority_vote	0.9818509251725972	0.5483870967741935	0.8447754387806868	0.63764765964728	180	3	TweetyNet	results/Bengalese_Finches/hidden_size/hidden_size_16/Bird9/results_210603_122731	results/Bengalese_Finches/hidden_size/hidden_size_16/Bird9/results_210603_122731/config_BirdsongRecognition_bird09.toml	data/BirdsongRecognition/Bird9/Wave_prep_210527_213350.csv	results/Bengalese_Finches/hidden_size/hidden_size_16/Bird9/results_210603_122731/train_dur_180s/replicate_3/TweetyNet/checkpoints/max-val-acc-checkpoint.pt	results/Bengalese_Finches/hidden_size/hidden_size_16/Bird9/results_210603_122731/train_dur_180s/replicate_3/StandardizeSpect	0.02	1.814907482740269	Bird9	4	hidden_size	16	Bengalese Finch	with
1051	none	0.9799726116919668	7.064516129032258	0.7643268842692931	8.15256721097793	180	3	TweetyNet	results/Bengalese_Finches/hidden_size/hidden_size_16/Bird9/results_210603_122731	results/Bengalese_Finches/hidden_size/hidden_size_16/Bird9/results_210603_122731/config_BirdsongRecognition_bird09.toml	data/BirdsongRecognition/Bird9/Wave_prep_210527_213350.csv	results/Bengalese_Finches/hidden_size/hidden_size_16/Bird9/results_210603_122731/train_dur_180s/replicate_3/TweetyNet/checkpoints/max-val-acc-checkpoint.pt	results/Bengalese_Finches/hidden_size/hidden_size_16/Bird9/results_210603_122731/train_dur_180s/replicate_3/StandardizeSpect	0.02	2.00273883080333	Bird9	4	hidden_size	16	Bengalese Finch	without
1054	min_segment_dur_majority_vote	0.9819983661604572	0.4516129032258064	0.8463286421440303	0.4950960168250999	180	4	TweetyNet	results/Bengalese_Finches/hidden_size/hidden_size_16/Bird9/results_210603_122731	results/Bengalese_Finches/hidden_size/hidden_size_16/Bird9/results_210603_122731/config_BirdsongRecognition_bird09.toml	data/BirdsongRecognition/Bird9/Wave_prep_210527_213350.csv	results/Bengalese_Finches/hidden_size/hidden_size_16/Bird9/results_210603_122731/train_dur_180s/replicate_4/TweetyNet/checkpoints/max-val-acc-checkpoint.pt	results/Bengalese_Finches/hidden_size/hidden_size_16/Bird9/results_210603_122731/train_dur_180s/replicate_4/StandardizeSpect	0.02	1.8001633839542786	Bird9	4	hidden_size	16	Bengalese Finch	with
1055	none	0.9801325913223482	8.580645161290322	0.7643314113616207	9.543026304957133	180	4	TweetyNet	results/Bengalese_Finches/hidden_size/hidden_size_16/Bird9/results_210603_122731	results/Bengalese_Finches/hidden_size/hidden_size_16/Bird9/results_210603_122731/config_BirdsongRecognition_bird09.toml	data/BirdsongRecognition/Bird9/Wave_prep_210527_213350.csv	results/Bengalese_Finches/hidden_size/hidden_size_16/Bird9/results_210603_122731/train_dur_180s/replicate_4/TweetyNet/checkpoints/max-val-acc-checkpoint.pt	results/Bengalese_Finches/hidden_size/hidden_size_16/Bird9/results_210603_122731/train_dur_180s/replicate_4/StandardizeSpect	0.02	1.98674086776518	Bird9	4	hidden_size	16	Bengalese Finch	without
1058	min_segment_dur_majority_vote	0.9823242146122472	0.5806451612903226	0.8424834136200164	0.66487731682425	180	5	TweetyNet	results/Bengalese_Finches/hidden_size/hidden_size_16/Bird9/results_210603_122731	results/Bengalese_Finches/hidden_size/hidden_size_16/Bird9/results_210603_122731/config_BirdsongRecognition_bird09.toml	data/BirdsongRecognition/Bird9/Wave_prep_210527_213350.csv	results/Bengalese_Finches/hidden_size/hidden_size_16/Bird9/results_210603_122731/train_dur_180s/replicate_5/TweetyNet/checkpoints/max-val-acc-checkpoint.pt	results/Bengalese_Finches/hidden_size/hidden_size_16/Bird9/results_210603_122731/train_dur_180s/replicate_5/StandardizeSpect	0.02	1.7675785387752718	Bird9	4	hidden_size	16	Bengalese Finch	with
1059	none	0.9812667432232238	6.290322580645161	0.790778809483371	7.2556739751050205	180	5	TweetyNet	results/Bengalese_Finches/hidden_size/hidden_size_16/Bird9/results_210603_122731	results/Bengalese_Finches/hidden_size/hidden_size_16/Bird9/results_210603_122731/config_BirdsongRecognition_bird09.toml	data/BirdsongRecognition/Bird9/Wave_prep_210527_213350.csv	results/Bengalese_Finches/hidden_size/hidden_size_16/Bird9/results_210603_122731/train_dur_180s/replicate_5/TweetyNet/checkpoints/max-val-acc-checkpoint.pt	results/Bengalese_Finches/hidden_size/hidden_size_16/Bird9/results_210603_122731/train_dur_180s/replicate_5/StandardizeSpect	0.02	1.8733256776776173	Bird9	4	hidden_size	16	Bengalese Finch	without
1062	min_segment_dur_majority_vote	0.9817239798320982	0.6129032258064516	0.831935007912374	0.70443806359621	180	6	TweetyNet	results/Bengalese_Finches/hidden_size/hidden_size_16/Bird9/results_210603_122731	results/Bengalese_Finches/hidden_size/hidden_size_16/Bird9/results_210603_122731/config_BirdsongRecognition_bird09.toml	data/BirdsongRecognition/Bird9/Wave_prep_210527_213350.csv	results/Bengalese_Finches/hidden_size/hidden_size_16/Bird9/results_210603_122731/train_dur_180s/replicate_6/TweetyNet/checkpoints/max-val-acc-checkpoint.pt	results/Bengalese_Finches/hidden_size/hidden_size_16/Bird9/results_210603_122731/train_dur_180s/replicate_6/StandardizeSpect	0.02	1.8276020167901752	Bird9	4	hidden_size	16	Bengalese Finch	with
1063	none	0.9806494502172516	6.258064516129032	0.7880505829800412	7.126226528392079	180	6	TweetyNet	results/Bengalese_Finches/hidden_size/hidden_size_16/Bird9/results_210603_122731	results/Bengalese_Finches/hidden_size/hidden_size_16/Bird9/results_210603_122731/config_BirdsongRecognition_bird09.toml	data/BirdsongRecognition/Bird9/Wave_prep_210527_213350.csv	results/Bengalese_Finches/hidden_size/hidden_size_16/Bird9/results_210603_122731/train_dur_180s/replicate_6/TweetyNet/checkpoints/max-val-acc-checkpoint.pt	results/Bengalese_Finches/hidden_size/hidden_size_16/Bird9/results_210603_122731/train_dur_180s/replicate_6/StandardizeSpect	0.02	1.9350549782748303	Bird9	4	hidden_size	16	Bengalese Finch	without
1066	min_segment_dur_majority_vote	0.9834916738926344	0.3225806451612903	0.8751643952058257	0.36790210720688	180	7	TweetyNet	results/Bengalese_Finches/hidden_size/hidden_size_16/Bird9/results_210603_122731	results/Bengalese_Finches/hidden_size/hidden_size_16/Bird9/results_210603_122731/config_BirdsongRecognition_bird09.toml	data/BirdsongRecognition/Bird9/Wave_prep_210527_213350.csv	results/Bengalese_Finches/hidden_size/hidden_size_16/Bird9/results_210603_122731/train_dur_180s/replicate_7/TweetyNet/checkpoints/max-val-acc-checkpoint.pt	results/Bengalese_Finches/hidden_size/hidden_size_16/Bird9/results_210603_122731/train_dur_180s/replicate_7/StandardizeSpect	0.02	1.6508326107365634	Bird9	4	hidden_size	16	Bengalese Finch	with
1067	none	0.9818642928265976	7.451612903225806	0.8017903416694263	8.492609972584141	180	7	TweetyNet	results/Bengalese_Finches/hidden_size/hidden_size_16/Bird9/results_210603_122731	results/Bengalese_Finches/hidden_size/hidden_size_16/Bird9/results_210603_122731/config_BirdsongRecognition_bird09.toml	data/BirdsongRecognition/Bird9/Wave_prep_210527_213350.csv	results/Bengalese_Finches/hidden_size/hidden_size_16/Bird9/results_210603_122731/train_dur_180s/replicate_7/TweetyNet/checkpoints/max-val-acc-checkpoint.pt	results/Bengalese_Finches/hidden_size/hidden_size_16/Bird9/results_210603_122731/train_dur_180s/replicate_7/StandardizeSpect	0.02	1.813570717340229	Bird9	4	hidden_size	16	Bengalese Finch	without
1070	min_segment_dur_majority_vote	0.9819920632155904	0.3870967741935484	0.8743464607607687	0.42698198144166	180	8	TweetyNet	results/Bengalese_Finches/hidden_size/hidden_size_16/Bird9/results_210603_122731	results/Bengalese_Finches/hidden_size/hidden_size_16/Bird9/results_210603_122731/config_BirdsongRecognition_bird09.toml	data/BirdsongRecognition/Bird9/Wave_prep_210527_213350.csv	results/Bengalese_Finches/hidden_size/hidden_size_16/Bird9/results_210603_122731/train_dur_180s/replicate_8/TweetyNet/checkpoints/max-val-acc-checkpoint.pt	results/Bengalese_Finches/hidden_size/hidden_size_16/Bird9/results_210603_122731/train_dur_180s/replicate_8/StandardizeSpect	0.02	1.8007936784409484	Bird9	4	hidden_size	16	Bengalese Finch	with
1071	none	0.9802369800405396	6.870967741935484	0.7948849788292831	7.92924891323606	180	8	TweetyNet	results/Bengalese_Finches/hidden_size/hidden_size_16/Bird9/results_210603_122731	results/Bengalese_Finches/hidden_size/hidden_size_16/Bird9/results_210603_122731/config_BirdsongRecognition_bird09.toml	data/BirdsongRecognition/Bird9/Wave_prep_210527_213350.csv	results/Bengalese_Finches/hidden_size/hidden_size_16/Bird9/results_210603_122731/train_dur_180s/replicate_8/TweetyNet/checkpoints/max-val-acc-checkpoint.pt	results/Bengalese_Finches/hidden_size/hidden_size_16/Bird9/results_210603_122731/train_dur_180s/replicate_8/StandardizeSpect	0.02	1.9763019959460395	Bird9	4	hidden_size	16	Bengalese Finch	without
1074	min_segment_dur_majority_vote	0.9830394035788595	0.2580645161290322	0.8885489082234744	0.28150396056616	180	9	TweetyNet	results/Bengalese_Finches/hidden_size/hidden_size_16/Bird9/results_210603_122731	results/Bengalese_Finches/hidden_size/hidden_size_16/Bird9/results_210603_122731/config_BirdsongRecognition_bird09.toml	data/BirdsongRecognition/Bird9/Wave_prep_210527_213350.csv	results/Bengalese_Finches/hidden_size/hidden_size_16/Bird9/results_210603_122731/train_dur_180s/replicate_9/TweetyNet/checkpoints/max-val-acc-checkpoint.pt	results/Bengalese_Finches/hidden_size/hidden_size_16/Bird9/results_210603_122731/train_dur_180s/replicate_9/StandardizeSpect	0.02	1.696059642114034	Bird9	4	hidden_size	16	Bengalese Finch	with
1075	none	0.9807771738654562	8.258064516129032	0.7863885438466881	9.64524274872612	180	9	TweetyNet	results/Bengalese_Finches/hidden_size/hidden_size_16/Bird9/results_210603_122731	results/Bengalese_Finches/hidden_size/hidden_size_16/Bird9/results_210603_122731/config_BirdsongRecognition_bird09.toml	data/BirdsongRecognition/Bird9/Wave_prep_210527_213350.csv	results/Bengalese_Finches/hidden_size/hidden_size_16/Bird9/results_210603_122731/train_dur_180s/replicate_9/TweetyNet/checkpoints/max-val-acc-checkpoint.pt	results/Bengalese_Finches/hidden_size/hidden_size_16/Bird9/results_210603_122731/train_dur_180s/replicate_9/StandardizeSpect	0.02	1.922282613454385	Bird9	4	hidden_size	16	Bengalese Finch	without
1078	min_segment_dur_majority_vote	0.9817150875628708	0.5806451612903226	0.8362811147124867	0.64600739476192	180	10	TweetyNet	results/Bengalese_Finches/hidden_size/hidden_size_16/Bird9/results_210603_122731	results/Bengalese_Finches/hidden_size/hidden_size_16/Bird9/results_210603_122731/config_BirdsongRecognition_bird09.toml	data/BirdsongRecognition/Bird9/Wave_prep_210527_213350.csv	results/Bengalese_Finches/hidden_size/hidden_size_16/Bird9/results_210603_122731/train_dur_180s/replicate_10/TweetyNet/checkpoints/max-val-acc-checkpoint.pt	results/Bengalese_Finches/hidden_size/hidden_size_16/Bird9/results_210603_122731/train_dur_180s/replicate_10/StandardizeSpect	0.02	1.8284912437129155	Bird9	4	hidden_size	16	Bengalese Finch	with
1079	none	0.9798831606722762	7.612903225806452	0.758687361810529	8.623652241144999	180	10	TweetyNet	results/Bengalese_Finches/hidden_size/hidden_size_16/Bird9/results_210603_122731	results/Bengalese_Finches/hidden_size/hidden_size_16/Bird9/results_210603_122731/config_BirdsongRecognition_bird09.toml	data/BirdsongRecognition/Bird9/Wave_prep_210527_213350.csv	results/Bengalese_Finches/hidden_size/hidden_size_16/Bird9/results_210603_122731/train_dur_180s/replicate_10/TweetyNet/checkpoints/max-val-acc-checkpoint.pt	results/Bengalese_Finches/hidden_size/hidden_size_16/Bird9/results_210603_122731/train_dur_180s/replicate_10/StandardizeSpect	0.02	2.011683932772379	Bird9	4	hidden_size	16	Bengalese Finch	without
1082	min_segment_dur_majority_vote	0.978372901718602	0.9032258064516128	0.7839248697496596	1.0964032871924398	45	1	TweetyNet	results/Bengalese_Finches/hidden_size/hidden_size_16/Bird9/results_210603_122731	results/Bengalese_Finches/hidden_size/hidden_size_16/Bird9/results_210603_122731/config_BirdsongRecognition_bird09.toml	data/BirdsongRecognition/Bird9/Wave_prep_210527_213350.csv	results/Bengalese_Finches/hidden_size/hidden_size_16/Bird9/results_210603_122731/train_dur_45s/replicate_1/TweetyNet/checkpoints/max-val-acc-checkpoint.pt	results/Bengalese_Finches/hidden_size/hidden_size_16/Bird9/results_210603_122731/train_dur_45s/replicate_1/StandardizeSpect	0.02	2.162709828139786	Bird9	1	hidden_size	16	Bengalese Finch	with
1083	none	0.9751209883639734	12.870967741935484	0.680896020212131	14.8035191275201	45	1	TweetyNet	results/Bengalese_Finches/hidden_size/hidden_size_16/Bird9/results_210603_122731	results/Bengalese_Finches/hidden_size/hidden_size_16/Bird9/results_210603_122731/config_BirdsongRecognition_bird09.toml	data/BirdsongRecognition/Bird9/Wave_prep_210527_213350.csv	results/Bengalese_Finches/hidden_size/hidden_size_16/Bird9/results_210603_122731/train_dur_45s/replicate_1/TweetyNet/checkpoints/max-val-acc-checkpoint.pt	results/Bengalese_Finches/hidden_size/hidden_size_16/Bird9/results_210603_122731/train_dur_45s/replicate_1/StandardizeSpect	0.02	2.487901163602657	Bird9	1	hidden_size	16	Bengalese Finch	without
1086	min_segment_dur_majority_vote	0.9791198255157372	1.1935483870967742	0.7880858512241153	1.39380957677763	45	2	TweetyNet	results/Bengalese_Finches/hidden_size/hidden_size_16/Bird9/results_210603_122731	results/Bengalese_Finches/hidden_size/hidden_size_16/Bird9/results_210603_122731/config_BirdsongRecognition_bird09.toml	data/BirdsongRecognition/Bird9/Wave_prep_210527_213350.csv	results/Bengalese_Finches/hidden_size/hidden_size_16/Bird9/results_210603_122731/train_dur_45s/replicate_2/TweetyNet/checkpoints/max-val-acc-checkpoint.pt	results/Bengalese_Finches/hidden_size/hidden_size_16/Bird9/results_210603_122731/train_dur_45s/replicate_2/StandardizeSpect	0.02	2.0880174484262715	Bird9	1	hidden_size	16	Bengalese Finch	with
1087	none	0.9765774167088276	12.64516129032258	0.696406157416273	14.0540985218582	45	2	TweetyNet	results/Bengalese_Finches/hidden_size/hidden_size_16/Bird9/results_210603_122731	results/Bengalese_Finches/hidden_size/hidden_size_16/Bird9/results_210603_122731/config_BirdsongRecognition_bird09.toml	data/BirdsongRecognition/Bird9/Wave_prep_210527_213350.csv	results/Bengalese_Finches/hidden_size/hidden_size_16/Bird9/results_210603_122731/train_dur_45s/replicate_2/TweetyNet/checkpoints/max-val-acc-checkpoint.pt	results/Bengalese_Finches/hidden_size/hidden_size_16/Bird9/results_210603_122731/train_dur_45s/replicate_2/StandardizeSpect	0.02	2.3422583291172527	Bird9	1	hidden_size	16	Bengalese Finch	without
1090	min_segment_dur_majority_vote	0.9797429695889628	0.6451612903225806	0.8098421861486379	0.74365700871453	45	3	TweetyNet	results/Bengalese_Finches/hidden_size/hidden_size_16/Bird9/results_210603_122731	results/Bengalese_Finches/hidden_size/hidden_size_16/Bird9/results_210603_122731/config_BirdsongRecognition_bird09.toml	data/BirdsongRecognition/Bird9/Wave_prep_210527_213350.csv	results/Bengalese_Finches/hidden_size/hidden_size_16/Bird9/results_210603_122731/train_dur_45s/replicate_3/TweetyNet/checkpoints/max-val-acc-checkpoint.pt	results/Bengalese_Finches/hidden_size/hidden_size_16/Bird9/results_210603_122731/train_dur_45s/replicate_3/StandardizeSpect	0.02	2.0257030411037213	Bird9	1	hidden_size	16	Bengalese Finch	with
1091	none	0.9766280795188212	13.838709677419354	0.7041703539010322	15.810498027662607	45	3	TweetyNet	results/Bengalese_Finches/hidden_size/hidden_size_16/Bird9/results_210603_122731	results/Bengalese_Finches/hidden_size/hidden_size_16/Bird9/results_210603_122731/config_BirdsongRecognition_bird09.toml	data/BirdsongRecognition/Bird9/Wave_prep_210527_213350.csv	results/Bengalese_Finches/hidden_size/hidden_size_16/Bird9/results_210603_122731/train_dur_45s/replicate_3/TweetyNet/checkpoints/max-val-acc-checkpoint.pt	results/Bengalese_Finches/hidden_size/hidden_size_16/Bird9/results_210603_122731/train_dur_45s/replicate_3/StandardizeSpect	0.02	2.3371920481178754	Bird9	1	hidden_size	16	Bengalese Finch	without
1094	min_segment_dur_majority_vote	0.9786439135139836	0.9032258064516128	0.7919489687340285	1.04374749126345	45	4	TweetyNet	results/Bengalese_Finches/hidden_size/hidden_size_16/Bird9/results_210603_122731	results/Bengalese_Finches/hidden_size/hidden_size_16/Bird9/results_210603_122731/config_BirdsongRecognition_bird09.toml	data/BirdsongRecognition/Bird9/Wave_prep_210527_213350.csv	results/Bengalese_Finches/hidden_size/hidden_size_16/Bird9/results_210603_122731/train_dur_45s/replicate_4/TweetyNet/checkpoints/max-val-acc-checkpoint.pt	results/Bengalese_Finches/hidden_size/hidden_size_16/Bird9/results_210603_122731/train_dur_45s/replicate_4/StandardizeSpect	0.02	2.13560864860165	Bird9	1	hidden_size	16	Bengalese Finch	with
1095	none	0.9756891219622412	11.935483870967742	0.6940392446015983	13.47471322100716	45	4	TweetyNet	results/Bengalese_Finches/hidden_size/hidden_size_16/Bird9/results_210603_122731	results/Bengalese_Finches/hidden_size/hidden_size_16/Bird9/results_210603_122731/config_BirdsongRecognition_bird09.toml	data/BirdsongRecognition/Bird9/Wave_prep_210527_213350.csv	results/Bengalese_Finches/hidden_size/hidden_size_16/Bird9/results_210603_122731/train_dur_45s/replicate_4/TweetyNet/checkpoints/max-val-acc-checkpoint.pt	results/Bengalese_Finches/hidden_size/hidden_size_16/Bird9/results_210603_122731/train_dur_45s/replicate_4/StandardizeSpect	0.02	2.4310878037758665	Bird9	1	hidden_size	16	Bengalese Finch	without
1098	min_segment_dur_majority_vote	0.9786640616771872	0.8064516129032258	0.8012183480652373	0.95165162238793	45	5	TweetyNet	results/Bengalese_Finches/hidden_size/hidden_size_16/Bird9/results_210603_122731	results/Bengalese_Finches/hidden_size/hidden_size_16/Bird9/results_210603_122731/config_BirdsongRecognition_bird09.toml	data/BirdsongRecognition/Bird9/Wave_prep_210527_213350.csv	results/Bengalese_Finches/hidden_size/hidden_size_16/Bird9/results_210603_122731/train_dur_45s/replicate_5/TweetyNet/checkpoints/max-val-acc-checkpoint.pt	results/Bengalese_Finches/hidden_size/hidden_size_16/Bird9/results_210603_122731/train_dur_45s/replicate_5/StandardizeSpect	0.02	2.1335938322812664	Bird9	1	hidden_size	16	Bengalese Finch	with
[truncated: 15,669 more rows]
