# Supplementary material for: Automated annotation of birdsong with a neural network that segments spectrograms
Source: eLife. 2022 Jan 20;11:e63853. doi: 10.7554/eLife.63853 (PMC8860439; doi:10.7554/eLife.63853)
Supplement: Figure 6—source data 1. [file elife-63853-fig6-data1.csv]

	Unnamed: 0	cleanup	avg_acc	avg_levenshtein	avg_pct_boundary_err	avg_segment_error_rate	train_set_dur	replicate_num	model_name	avg_error	animal_id	train_set_dur_ind	day_int	day
2	1202	min_segment_dur_majority_vote	0.9857213075944116	0.8095238095238095	0.8338698169979121	0.63892196826641	600	1	TweetyNet	1.4278692405588544	bl26lb16	6	1
6	1206	min_segment_dur_majority_vote	0.9852268686554314	0.7619047619047619	0.7873620452795256	0.80830106904306	600	2	TweetyNet	1.477313134456859	bl26lb16	6	1
10	1210	min_segment_dur_majority_vote	0.9861812995966194	0.7619047619047619	0.8326909393656766	0.58460994392239	600	3	TweetyNet	1.3818700403380624	bl26lb16	6	1
14	1214	min_segment_dur_majority_vote	0.9852599014952472	1.0476190476190477	0.8002169627320318	0.9792054868082999	600	4	TweetyNet	1.4740098504752883	bl26lb16	6	1
18	1218	min_segment_dur_majority_vote	0.9857357776308382	0.4761904761904761	0.8381687548546208	0.32302416197642997	600	5	TweetyNet	1.4264222369161803	bl26lb16	6	1
22	1222	min_segment_dur_majority_vote	0.9859612782850968	0.8571428571428571	0.8182894665193929	1.34176346066753	600	6	TweetyNet	1.4038721714903168	bl26lb16	6	1
26	1226	min_segment_dur_majority_vote	0.9875577533672713	0.4761904761904761	0.8545404982522458	0.33295932888535	600	7	TweetyNet	1.2442246632728748	bl26lb16	6	1
30	1230	min_segment_dur_majority_vote	0.9866082338953476	0.5714285714285714	0.8605986822935189	0.42850193894390004	600	8	TweetyNet	1.3391766104652314	bl26lb16	6	1
34	1234	min_segment_dur_majority_vote	0.9865825140324924	0.6666666666666666	0.8465848505578754	0.44189593329517	600	9	TweetyNet	1.341748596750747	bl26lb16	6	1
38	1238	min_segment_dur_majority_vote	0.98565158556169	0.7619047619047619	0.8194188229663785	0.5363778942073	600	10	TweetyNet	1.4348414438310142	bl26lb16	6	1
42	1482	min_segment_dur_majority_vote	0.9829984868646604	1.5172413793103448	0.623934834267209	2.8091099196536398	600	1	TweetyNet	1.7001513135339708	gr41rd51	6	1
46	1486	min_segment_dur_majority_vote	0.983683617989506	1.5172413793103448	0.6158882406422275	2.71910461307371	600	2	TweetyNet	1.6316382010494013	gr41rd51	6	1
50	1490	min_segment_dur_majority_vote	0.985091777587913	1.0689655172413792	0.6651709934172442	2.10518654925231	600	3	TweetyNet	1.4908222412087002	gr41rd51	6	1
54	1494	min_segment_dur_majority_vote	0.985718291090594	1.103448275862069	0.6624574274811713	1.90574256743579	600	4	TweetyNet	1.4281708909405944	gr41rd51	6	1
58	1498	min_segment_dur_majority_vote	0.984153596641723	1.4482758620689655	0.6536697255349463	2.63456785292105	600	5	TweetyNet	1.5846403358277028	gr41rd51	6	1
62	1502	min_segment_dur_majority_vote	0.986103631663476	1.103448275862069	0.6840639715822466	1.99116006341695	600	6	TweetyNet	1.3896368336523968	gr41rd51	6	1
66	1506	min_segment_dur_majority_vote	0.986040036579555	0.9655172413793104	0.6966049130490843	1.6804937661329102	600	7	TweetyNet	1.3959963420445032	gr41rd51	6	1
70	1510	min_segment_dur_majority_vote	0.9854015931182154	1.103448275862069	0.6618079915952169	2.17739630501167	600	8	TweetyNet	1.4598406881784598	gr41rd51	6	1
74	1514	min_segment_dur_majority_vote	0.9866731868749375	1.0	0.6825423160572098	1.87383729885378	600	9	TweetyNet	1.332681312506245	gr41rd51	6	1
78	1518	min_segment_dur_majority_vote	0.9860147103047632	1.103448275862069	0.6704561817622827	2.01518295626511	600	10	TweetyNet	1.3985289695236935	gr41rd51	6	1
82	1762	min_segment_dur_majority_vote	0.9811386231288276	0.6944444444444444	0.8070100998523146	0.92048178164392	600	1	TweetyNet	1.8861376871172288	gy6or6	6	1
86	1766	min_segment_dur_majority_vote	0.9809749406755324	0.6388888888888888	0.8169194676229177	0.87190197498644	600	2	TweetyNet	1.902505932446763	gy6or6	6	1
90	1770	min_segment_dur_majority_vote	0.984174565364763	0.5	0.8359805765609487	0.70466802880815	600	3	TweetyNet	1.5825434635237	gy6or6	6	1
94	1774	min_segment_dur_majority_vote	0.9828929886327172	0.4722222222222222	0.8245225247822432	0.62113119537277	600	4	TweetyNet	1.7107011367282876	gy6or6	6	1
98	1778	min_segment_dur_majority_vote	0.984089424738327	0.6944444444444444	0.8232660544922695	0.98367354919063	600	5	TweetyNet	1.5910575261673054	gy6or6	6	1
102	1782	min_segment_dur_majority_vote	0.9819092868950156	0.6944444444444444	0.8184046906874481	0.9613985313771399	600	6	TweetyNet	1.8090713104984333	gy6or6	6	1
106	1786	min_segment_dur_majority_vote	0.984598785336013	0.3888888888888889	0.8456043817566455	0.554730487806	600	7	TweetyNet	1.5401214663987028	gy6or6	6	1
110	1790	min_segment_dur_majority_vote	0.9838072054968108	0.4444444444444444	0.8414437033720286	0.63774656970017	600	8	TweetyNet	1.6192794503189225	gy6or6	6	1
114	1794	min_segment_dur_majority_vote	0.9805575298274636	0.6111111111111112	0.8061879533201284	0.94009498992549	600	9	TweetyNet	1.9442470172536308	gy6or6	6	1
118	1798	min_segment_dur_majority_vote	0.981721776653475	0.6388888888888888	0.812324072933809	0.8857342135408	600	10	TweetyNet	1.827822334652496	gy6or6	6	1
122	2042	min_segment_dur_majority_vote	0.986337896159768	0.1875	0.8682850391673277	0.3339458244601	600	1	TweetyNet	1.366210384023192	or60yw70	6	1
126	2046	min_segment_dur_majority_vote	0.986043886042446	0.34375	0.8427990412440852	0.77491752220425	600	2	TweetyNet	1.3956113957554028	or60yw70	6	1
130	2050	min_segment_dur_majority_vote	0.9854872613971938	0.34375	0.8391300823836414	0.6030923916433001	600	3	TweetyNet	1.451273860280622	or60yw70	6	1
134	2054	min_segment_dur_majority_vote	0.9860614062139398	0.40625	0.8479310257009295	0.80548672745755	600	4	TweetyNet	1.3938593786060216	or60yw70	6	1
138	2058	min_segment_dur_majority_vote	0.9859670438106336	0.375	0.8473147976848301	0.65747438587742	600	5	TweetyNet	1.4032956189366508	or60yw70	6	1
142	2062	min_segment_dur_majority_vote	0.9846768235047276	0.46875	0.8220683059963034	0.7984163894980699	600	6	TweetyNet	1.5323176495272262	or60yw70	6	1
146	2066	min_segment_dur_majority_vote	0.987090471726496	0.21875	0.8897345454202763	0.34730269636961003	600	7	TweetyNet	1.2909528273504	or60yw70	6	1
150	2070	min_segment_dur_majority_vote	0.9862641354398052	0.40625	0.8508519493385505	0.8919355603491601	600	8	TweetyNet	1.373586456019482	or60yw70	6	1
154	2074	min_segment_dur_majority_vote	0.9856483924884424	0.4375	0.8336462896661607	1.1800204454735201	600	9	TweetyNet	1.4351607511557618	or60yw70	6	1
158	2078	min_segment_dur_majority_vote	0.9855161657998388	0.3125	0.8478160411264165	0.74624846584241	600	10	TweetyNet	1.4483834200161083	or60yw70	6	1
162	2	min_segment_dur_majority_vote	0.98537102537892	1.6612903225806452	0.7147268326076586	4.230689080141739	600	1	TweetyNet	1.4628974621079929	bl26lb16	0	2	2012-04-20
166	6	min_segment_dur_majority_vote	0.9840546137730288	1.85483870967742	0.6896531070596796	4.48104108429832	600	2	TweetyNet	1.594538622697106	bl26lb16	0	2	2012-04-20
170	10	min_segment_dur_majority_vote	0.9847469206013983	1.7741935483870968	0.702120823404813	4.82290717511506	600	3	TweetyNet	1.5253079398601654	bl26lb16	0	2	2012-04-20
174	14	min_segment_dur_majority_vote	0.9852722152554052	1.7096774193548387	0.7049323648222272	4.09978954189182	600	4	TweetyNet	1.4727784744594907	bl26lb16	0	2	2012-04-20
178	18	min_segment_dur_majority_vote	0.9837955321706732	1.6612903225806452	0.6903744516237207	4.98533055241563	600	5	TweetyNet	1.620446782932694	bl26lb16	0	2	2012-04-20
182	22	min_segment_dur_majority_vote	0.9856184444850048	1.6774193548387095	0.7075133669762086	4.23801393038146	600	6	TweetyNet	1.4381555514995314	bl26lb16	0	2	2012-04-20
186	26	min_segment_dur_majority_vote	0.9860301507255118	1.4193548387096775	0.7406846421993445	3.87860983302492	600	7	TweetyNet	1.3969849274488189	bl26lb16	0	2	2012-04-20
190	30	min_segment_dur_majority_vote	0.9846016075166474	1.870967741935484	0.7032883241480888	4.7021828056016295	600	8	TweetyNet	1.539839248335262	bl26lb16	0	2	2012-04-20
194	34	min_segment_dur_majority_vote	0.9853683776847948	2.2096774193548385	0.6940372231122305	7.42475301009652	600	9	TweetyNet	1.4631622315205317	bl26lb16	0	2	2012-04-20
198	38	min_segment_dur_majority_vote	0.9851130248593374	1.4838709677419355	0.7155363009790608	4.75649526334166	600	10	TweetyNet	1.4886975140662615	bl26lb16	0	2	2012-04-20
202	42	min_segment_dur_majority_vote	0.9859623115790634	1.9523809523809523	0.6677451087041365	2.53118500916725	600	1	TweetyNet	1.4037688420936556	bl26lb16	0	3	2012-04-21
206	46	min_segment_dur_majority_vote	0.9849419316526477	1.7857142857142858	0.6664643725027057	2.45723263815962	600	2	TweetyNet	1.505806834735235	bl26lb16	0	3	2012-04-21
210	50	min_segment_dur_majority_vote	0.985672544771812	2.0476190476190474	0.6714258856487968	2.68109889529451	600	3	TweetyNet	1.4327455228187902	bl26lb16	0	3	2012-04-21
214	54	min_segment_dur_majority_vote	0.9856799988375806	1.7142857142857142	0.6621230195242278	2.48340469634802	600	4	TweetyNet	1.4320001162419382	bl26lb16	0	3	2012-04-21
218	58	min_segment_dur_majority_vote	0.9855753511900496	1.738095238095238	0.6680202190195349	2.31696663113112	600	5	TweetyNet	1.4424648809950424	bl26lb16	0	3	2012-04-21
222	62	min_segment_dur_majority_vote	0.9868404672107042	1.761904761904762	0.7014030917726009	2.49539631592176	600	6	TweetyNet	1.3159532789295825	bl26lb16	0	3	2012-04-21
226	66	min_segment_dur_majority_vote	0.9866990647356444	1.5476190476190477	0.7007139044778157	2.14189205669766	600	7	TweetyNet	1.3300935264355718	bl26lb16	0	3	2012-04-21
230	70	min_segment_dur_majority_vote	0.9859529668537956	2.071428571428572	0.6696846276084631	2.97875651671275	600	8	TweetyNet	1.4047033146204255	bl26lb16	0	3	2012-04-21
234	74	min_segment_dur_majority_vote	0.98588349847374	3.0	0.6577168839482301	4.17882460832626	600	9	TweetyNet	1.4116501526259873	bl26lb16	0	3	2012-04-21
238	78	min_segment_dur_majority_vote	0.9858568123067508	1.9523809523809523	0.6697929418677223	2.58523914318703	600	10	TweetyNet	1.4143187693249182	bl26lb16	0	3	2012-04-21
242	82	min_segment_dur_majority_vote	0.98167736797982	1.6851851851851851	0.5657757870268908	3.8228501103921597	600	1	TweetyNet	1.832263202018014	gr41rd51	0	2	2012-06-20
246	86	min_segment_dur_majority_vote	0.9845359498743268	1.1666666666666667	0.6419487125009683	2.61132458864433	600	2	TweetyNet	1.54640501256732	gr41rd51	0	2	2012-06-20
250	90	min_segment_dur_majority_vote	0.9841709224543124	1.2962962962962965	0.6370799594978153	3.1775803331335095	600	3	TweetyNet	1.582907754568752	gr41rd51	0	2	2012-06-20
254	94	min_segment_dur_majority_vote	0.9856105326579082	1.0185185185185186	0.6951974337434969	2.32703843987976	600	4	TweetyNet	1.4389467342091788	gr41rd51	0	2	2012-06-20
258	98	min_segment_dur_majority_vote	0.9799576095532336	1.907407407407408	0.531152589494669	4.39956663656957	600	5	TweetyNet	2.0042390446766367	gr41rd51	0	2	2012-06-20
262	102	min_segment_dur_majority_vote	0.9839980174171886	1.351851851851852	0.5706858672975389	3.0582977970722203	600	6	TweetyNet	1.600198258281138	gr41rd51	0	2	2012-06-20
266	106	min_segment_dur_majority_vote	0.9844714930244818	1.1666666666666667	0.6233307316130184	2.71885504514686	600	7	TweetyNet	1.552850697551822	gr41rd51	0	2	2012-06-20
270	110	min_segment_dur_majority_vote	0.9858785953417922	0.9814814814814816	0.65529382885771	2.328789766804	600	8	TweetyNet	1.412140465820777	gr41rd51	0	2	2012-06-20
274	114	min_segment_dur_majority_vote	0.9851590942539457	1.0	0.6738512273771912	2.3492395482265698	600	9	TweetyNet	1.4840905746054456	gr41rd51	0	2	2012-06-20
278	118	min_segment_dur_majority_vote	0.9863485555824404	0.925925925925926	0.6945441229213907	2.18191817070908	600	10	TweetyNet	1.36514444175595	gr41rd51	0	2	2012-06-20
282	122	min_segment_dur_majority_vote	0.9815247923880724	1.4623655913978495	0.6323541898839783	2.74714791074741	600	1	TweetyNet	1.8475207611927669	gr41rd51	0	3	2012-06-22
286	126	min_segment_dur_majority_vote	0.98195013479431	1.3064516129032258	0.644458659595925	2.43902757614867	600	2	TweetyNet	1.8049865205689963	gr41rd51	0	3	2012-06-22
290	130	min_segment_dur_majority_vote	0.9825870090856572	1.1451612903225807	0.6741952011284187	2.1882321217704797	600	3	TweetyNet	1.7412990914342783	gr41rd51	0	3	2012-06-22
294	134	min_segment_dur_majority_vote	0.9844357247002228	1.010752688172043	0.6911369687161122	1.9001882375653498	600	4	TweetyNet	1.556427529977733	gr41rd51	0	3	2012-06-22
298	138	min_segment_dur_majority_vote	0.9800253237161924	1.5	0.5872147173290236	2.8584096376891197	600	5	TweetyNet	1.9974676283807669	gr41rd51	0	3	2012-06-22
302	142	min_segment_dur_majority_vote	0.98376502429598	1.1666666666666667	0.6489625627774089	2.20707325058345	600	6	TweetyNet	1.6234975704019885	gr41rd51	0	3	2012-06-22
306	146	min_segment_dur_majority_vote	0.9842297524615105	1.053763440860215	0.6898560456652116	2.017835953618	600	7	TweetyNet	1.5770247538489546	gr41rd51	0	3	2012-06-22
310	150	min_segment_dur_majority_vote	0.9827213489262312	1.2258064516129032	0.6497137202721579	2.29968180619754	600	8	TweetyNet	1.7278651073768692	gr41rd51	0	3	2012-06-22
314	154	min_segment_dur_majority_vote	0.9835969090446904	1.064516129032258	0.6656630534593628	2.02772096395559	600	9	TweetyNet	1.6403090955309674	gr41rd51	0	3	2012-06-22
318	158	min_segment_dur_majority_vote	0.9842864468406172	1.021505376344086	0.6874259190348747	1.94735399593461	600	10	TweetyNet	1.5713553159382831	gr41rd51	0	3	2012-06-22
322	162	min_segment_dur_majority_vote	0.9813598377019764	1.9411764705882355	0.5967931262642286	3.4242084557977495	600	1	TweetyNet	1.8640162298023453	gr41rd51	0	4	2012-06-23
326	166	min_segment_dur_majority_vote	0.9831764210629154	1.5916955017301038	0.6269257096544499	2.81892303097361	600	2	TweetyNet	1.6823578937084638	gr41rd51	0	4	2012-06-23
330	170	min_segment_dur_majority_vote	0.9833699669655892	1.4325259515570934	0.6553326582841048	2.5947980098519	600	3	TweetyNet	1.6630033034410796	gr41rd51	0	4	2012-06-23
334	174	min_segment_dur_majority_vote	0.9847486686447844	1.2629757785467128	0.6523729427075605	2.21231072853075	600	4	TweetyNet	1.5251331355215505	gr41rd51	0	4	2012-06-23
338	178	min_segment_dur_majority_vote	0.980768439822026	1.8615916955017304	0.5768557764421705	3.32343066848374	600	5	TweetyNet	1.9231560177974003	gr41rd51	0	4	2012-06-23
342	182	min_segment_dur_majority_vote	0.983243190351385	1.5916955017301038	0.5925052253854813	2.72953661919243	600	6	TweetyNet	1.6756809648615034	gr41rd51	0	4	2012-06-23
346	186	min_segment_dur_majority_vote	0.9847463953998388	1.3044982698961938	0.6545229327166314	2.35994816621055	600	7	TweetyNet	1.525360460016123	gr41rd51	0	4	2012-06-23
350	190	min_segment_dur_majority_vote	0.984419296829179	1.3494809688581315	0.6281038620751297	2.35787757219765	600	8	TweetyNet	1.5580703170821053	gr41rd51	0	4	2012-06-23
354	194	min_segment_dur_majority_vote	0.9855429775472798	1.200692041522491	0.6647602107027824	2.17385609087843	600	9	TweetyNet	1.445702245272018	gr41rd51	0	4	2012-06-23
358	198	min_segment_dur_majority_vote	0.9851570444995748	1.2525951557093429	0.6692634106643726	2.24683877707144	600	10	TweetyNet	1.4842955500425137	gr41rd51	0	4	2012-06-23
362	202	min_segment_dur_majority_vote	0.982032104284826	0.4933333333333333	0.8292042931710398	0.8879303776606701	600	1	TweetyNet	1.7967895715173987	gy6or6	0	2	2012-03-23
366	206	min_segment_dur_majority_vote	0.9839507026067464	0.6	0.8343720624779136	1.20706897047989	600	2	TweetyNet	1.604929739325356	gy6or6	0	2	2012-03-23
370	210	min_segment_dur_majority_vote	0.984739316243029	0.42	0.8671626727646243	0.78998976131724	600	3	TweetyNet	1.5260683756970983	gy6or6	0	2	2012-03-23
374	214	min_segment_dur_majority_vote	0.9842870413554884	0.3133333333333333	0.8663260605541023	0.54574041428545	600	4	TweetyNet	1.57129586445115	gy6or6	0	2	2012-03-23
378	218	min_segment_dur_majority_vote	0.985500197063648	0.4333333333333333	0.8614932334223634	0.8965070999827099	600	5	TweetyNet	1.4499802936352002	gy6or6	0	2	2012-03-23
382	222	min_segment_dur_majority_vote	0.9825331156671592	0.94	0.8036119548674755	2.2171669216699197	600	6	TweetyNet	1.7466884332840826	gy6or6	0	2	2012-03-23
386	226	min_segment_dur_majority_vote	0.985017110271206	0.3733333333333333	0.8664633241271823	0.66049012963568	600	7	TweetyNet	1.4982889728794024	gy6or6	0	2	2012-03-23
390	230	min_segment_dur_majority_vote	0.9845729014332844	0.3466666666666667	0.8757731137183047	0.64284996157462	600	8	TweetyNet	1.5427098566715536	gy6or6	0	2	2012-03-23
394	234	min_segment_dur_majority_vote	0.9842165772057432	0.42	0.8643135381155767	0.82140898977457	600	9	TweetyNet	1.5783422794256707	gy6or6	0	2	2012-03-23
398	238	min_segment_dur_majority_vote	0.9810265987158712	0.9066666666666666	0.8056221808354985	2.1389449367896	600	10	TweetyNet	1.8973401284128832	gy6or6	0	2	2012-03-23
402	242	min_segment_dur_majority_vote	0.9841060519918076	0.2125603864734299	0.8910331667236037	0.37749206386784	600	1	TweetyNet	1.5893948008192549	gy6or6	0	3	2012-03-24
406	246	min_segment_dur_majority_vote	0.985557242097626	0.323671497584541	0.8953180314376126	0.56514652296207	600	2	TweetyNet	1.4442757902373926	gy6or6	0	3	2012-03-24
410	250	min_segment_dur_majority_vote	0.9861617965026052	0.1835748792270531	0.9166871331383836	0.29288872975173	600	3	TweetyNet	1.383820349739473	gy6or6	0	3	2012-03-24
414	254	min_segment_dur_majority_vote	0.9856468795617346	0.1884057971014492	0.9023710105342456	0.29731850825885	600	4	TweetyNet	1.435312043826542	gy6or6	0	3	2012-03-24
418	258	min_segment_dur_majority_vote	0.9866752133704302	0.217391304347826	0.9144535007865136	0.34246270197251	600	5	TweetyNet	1.3324786629569818	gy6or6	0	3	2012-03-24
422	262	min_segment_dur_majority_vote	0.9858044917609478	0.3381642512077294	0.9006588299905429	0.60572849662732	600	6	TweetyNet	1.4195508239052246	gy6or6	0	3	2012-03-24
426	266	min_segment_dur_majority_vote	0.9863155225941233	0.2222222222222222	0.917897550952218	0.33691158348891	600	7	TweetyNet	1.368447740587686	gy6or6	0	3	2012-03-24
430	270	min_segment_dur_majority_vote	0.9860040456164084	0.1594202898550724	0.9172343990691256	0.26036749438304	600	8	TweetyNet	1.399595438359158	gy6or6	0	3	2012-03-24
434	274	min_segment_dur_majority_vote	0.9852667339379068	0.2270531400966183	0.9063246826660836	0.39653813094087	600	9	TweetyNet	1.473326606209313	gy6or6	0	3	2012-03-24
438	278	min_segment_dur_majority_vote	0.9844942863044622	0.3719806763285024	0.8952740512516935	0.63491552936485	600	10	TweetyNet	1.550571369553777	gy6or6	0	3	2012-03-24
442	282	min_segment_dur_majority_vote	0.98254851421287	0.4102564102564102	0.8342635354578235	0.6651309022052	600	1	TweetyNet	1.7451485787130072	gy6or6	0	4	2012-03-26
446	286	min_segment_dur_majority_vote	0.9842826383664708	0.9743589743589745	0.8382189650851611	1.61553925825847	600	2	TweetyNet	1.5717361633529103	gy6or6	0	4	2012-03-26
450	290	min_segment_dur_majority_vote	0.9843472578712164	0.3846153846153846	0.8666296895041237	0.60415534421395	600	3	TweetyNet	1.5652742128783648	gy6or6	0	4	2012-03-26
454	294	min_segment_dur_majority_vote	0.9844996191442528	0.4102564102564102	0.8748224522810836	0.6289723664772	600	4	TweetyNet	1.5500380855747231	gy6or6	0	4	2012-03-26
458	298	min_segment_dur_majority_vote	0.9855085758725332	0.4871794871794871	0.8744074909264921	0.8271492595684999	600	5	TweetyNet	1.4491424127466734	gy6or6	0	4	2012-03-26
462	302	min_segment_dur_majority_vote	0.9836064579411892	0.9487179487179488	0.8233539405755125	1.49988955899657	600	6	TweetyNet	1.639354205881094	gy6or6	0	4	2012-03-26
466	306	min_segment_dur_majority_vote	0.9848854745842056	0.3846153846153846	0.8698551860177057	0.57223490047448	600	7	TweetyNet	1.51145254157945	gy6or6	0	4	2012-03-26
470	310	min_segment_dur_majority_vote	0.9847181788202668	0.358974358974359	0.8638038635461331	0.58873195397142	600	8	TweetyNet	1.5281821179733313	gy6or6	0	4	2012-03-26
474	314	min_segment_dur_majority_vote	0.983976381746382	0.4615384615384615	0.8682991197546708	0.7830910633363899	600	9	TweetyNet	1.6023618253617866	gy6or6	0	4	2012-03-26
478	318	min_segment_dur_majority_vote	0.9816430736908236	0.9230769230769232	0.809084696601656	1.52392082409101	600	10	TweetyNet	1.835692630917629	gy6or6	0	4	2012-03-26
482	322	min_segment_dur_majority_vote	0.9877272765062336	0.4	0.8886265203522095	0.48199983606987	600	1	TweetyNet	1.2272723493766513	or60yw70	0	2	2012-09-27
486	326	min_segment_dur_majority_vote	0.9883307967366431	0.4769230769230769	0.8671520448640465	0.66867126771331	600	2	TweetyNet	1.166920326335685	or60yw70	0	2	2012-09-27
490	330	min_segment_dur_majority_vote	0.9864360823947992	0.4461538461538462	0.874795121797268	0.52808994152	600	3	TweetyNet	1.3563917605200817	or60yw70	0	2	2012-09-27
494	334	min_segment_dur_majority_vote	0.9864845482640224	0.5846153846153846	0.8560212973336685	0.79580329757455	600	4	TweetyNet	1.3515451735977568	or60yw70	0	2	2012-09-27
498	338	min_segment_dur_majority_vote	0.9874031795498748	0.4615384615384615	0.8725088235178956	0.72729342169911	600	5	TweetyNet	1.2596820450125223	or60yw70	0	2	2012-09-27
502	342	min_segment_dur_majority_vote	0.9856468317118344	0.5384615384615384	0.8618023269282697	0.67509289355079	600	6	TweetyNet	1.4353168288165463	or60yw70	0	2	2012-09-27
506	346	min_segment_dur_majority_vote	0.9882292686634544	0.4923076923076923	0.8874613261106871	0.56997378143838	600	7	TweetyNet	1.1770731336545714	or60yw70	0	2	2012-09-27
510	350	min_segment_dur_majority_vote	0.9866761914148968	0.5692307692307692	0.8627649087410003	0.9315904715520301	600	8	TweetyNet	1.332380858510318	or60yw70	0	2	2012-09-27
514	354	min_segment_dur_majority_vote	0.9871897397374176	0.5076923076923077	0.8602479934963705	0.73671243885155	600	9	TweetyNet	1.2810260262582365	or60yw70	0	2	2012-09-27
518	358	min_segment_dur_majority_vote	0.9852659701143026	0.6153846153846154	0.8631674942019346	0.7567581051014399	600	10	TweetyNet	1.4734029885697386	or60yw70	0	2	2012-09-27
522	362	min_segment_dur_majority_vote	0.9870339604419556	0.3473684210526316	0.8940691540015263	0.45906178343649	600	1	TweetyNet	1.2966039558044318	or60yw70	0	3	2012-09-29
526	366	min_segment_dur_majority_vote	0.9864030797789348	0.5157894736842106	0.8471848428505198	1.01299088035651	600	2	TweetyNet	1.3596920221065067	or60yw70	0	3	2012-09-29
530	370	min_segment_dur_majority_vote	0.9862881574549794	0.3894736842105263	0.8774218547938734	0.56131919727383	600	3	TweetyNet	1.3711842545020558	or60yw70	0	3	2012-09-29
534	374	min_segment_dur_majority_vote	0.9867405056517932	0.3894736842105263	0.8756565928757699	0.70413957534653	600	4	TweetyNet	1.3259494348206724	or60yw70	0	3	2012-09-29
538	378	min_segment_dur_majority_vote	0.9873206303459878	0.3789473684210526	0.8894285726787173	0.61853669130945	600	5	TweetyNet	1.2679369654012174	or60yw70	0	3	2012-09-29
542	382	min_segment_dur_majority_vote	0.9866184817875028	0.5157894736842106	0.8743081729262279	0.7263143162378299	600	6	TweetyNet	1.3381518212497334	or60yw70	0	3	2012-09-29
546	386	min_segment_dur_majority_vote	0.9872751409443064	0.3684210526315789	0.8902462166388165	0.70985946542255	600	7	TweetyNet	1.272485905569365	or60yw70	0	3	2012-09-29
550	390	min_segment_dur_majority_vote	0.986687176455054	0.4526315789473684	0.8598415897252938	0.84733610471873	600	8	TweetyNet	1.3312823544946115	or60yw70	0	3	2012-09-29
554	394	min_segment_dur_majority_vote	0.9870758210099244	0.3789473684210526	0.890000372356056	0.5527092326291599	600	9	TweetyNet	1.2924178990075696	or60yw70	0	3	2012-09-29
558	398	min_segment_dur_majority_vote	0.986243252610934	0.4210526315789473	0.8728304219458577	0.7118861395309299	600	10	TweetyNet	1.375674738906596	or60yw70	0	3	2012-09-29
562	402	min_segment_dur_majority_vote	0.985870468820878	0.3164556962025316	0.8651947621593975	0.52910937886483	600	1	TweetyNet	1.4129531179121968	or60yw70	0	4	2012-09-30
566	406	min_segment_dur_majority_vote	0.9860843001036952	0.4683544303797468	0.8424596130177334	0.6773627853455899	600	2	TweetyNet	1.3915699896304812	or60yw70	0	4	2012-09-30
570	410	min_segment_dur_majority_vote	0.9856788970976842	0.3291139240506329	0.8687895302316708	0.56082421955549	600	3	TweetyNet	1.4321102902315808	or60yw70	0	4	2012-09-30
574	414	min_segment_dur_majority_vote	0.98586367837772	0.430379746835443	0.8634253000107275	0.91378124161446	600	4	TweetyNet	1.4136321622280068	or60yw70	0	4	2012-09-30
578	418	min_segment_dur_majority_vote	0.9868828290272292	0.3164556962025316	0.8798701532076577	0.61322129136098	600	5	TweetyNet	1.3117170972770764	or60yw70	0	4	2012-09-30
582	422	min_segment_dur_majority_vote	0.9854958988041224	0.4556962025316455	0.8480043180535566	0.7873930233840599	600	6	TweetyNet	1.450410119587775	or60yw70	0	4	2012-09-30
586	426	min_segment_dur_majority_vote	0.9872263890979602	0.3037974683544304	0.8856349614233407	0.46103150904717993	600	7	TweetyNet	1.2773610902039767	or60yw70	0	4	2012-09-30
590	430	min_segment_dur_majority_vote	0.9858769921459258	0.4683544303797468	0.844842279998394	0.82075545310908	600	8	TweetyNet	1.4123007854074163	or60yw70	0	4	2012-09-30
594	434	min_segment_dur_majority_vote	0.9865007859928996	0.3291139240506329	0.8632441718895185	0.55078515778368	600	9	TweetyNet	1.3499214007100302	or60yw70	0	4	2012-09-30
598	438	min_segment_dur_majority_vote	0.9855432554874446	0.379746835443038	0.8565632989565858	0.7489441048651301	600	10	TweetyNet	1.4456744512555408	or60yw70	0	4	2012-09-30
