# Supplementary material for: Automated annotation of birdsong with a neural network that segments spectrograms
Source: eLife. 2022 Jan 20;11:e63853. doi: 10.7554/eLife.63853 (PMC8860439; doi:10.7554/eLife.63853)
Supplement: Figure 6—source data 2. [file elife-63853-fig6-data2.csv]

	Unnamed: 0	animal_id	day	transition	prob	source	replicate_num	Source
44	44	gr41rd51	2012-06-20	('e', 'f')	0.7727272727272727	ground_truth		Ground truth
45	45	gr41rd51	2012-06-20	('e', 'f')	0.7689393939393939	model	0.0	Model predictions
46	46	gr41rd51	2012-06-20	('e', 'f')	0.7640449438202247	model	1.0	Model predictions
47	47	gr41rd51	2012-06-20	('e', 'f')	0.7756653992395437	model	2.0	Model predictions
48	48	gr41rd51	2012-06-20	('e', 'f')	0.7622641509433963	model	3.0	Model predictions
49	49	gr41rd51	2012-06-20	('e', 'f')	0.7727272727272727	model	4.0	Model predictions
50	50	gr41rd51	2012-06-20	('e', 'f')	0.7689393939393939	model	5.0	Model predictions
51	51	gr41rd51	2012-06-20	('e', 'f')	0.7689393939393939	model	6.0	Model predictions
52	52	gr41rd51	2012-06-20	('e', 'f')	0.769811320754717	model	7.0	Model predictions
53	53	gr41rd51	2012-06-20	('e', 'f')	0.7660377358490567	model	8.0	Model predictions
54	54	gr41rd51	2012-06-20	('e', 'f')	0.7604562737642585	model	9.0	Model predictions
55	55	gr41rd51	2012-06-22	('e', 'f')	0.7264050901378579	ground_truth		Ground truth
56	56	gr41rd51	2012-06-22	('e', 'f')	0.7339743589743589	model	0.0	Model predictions
57	57	gr41rd51	2012-06-22	('e', 'f')	0.7342582710779082	model	1.0	Model predictions
58	58	gr41rd51	2012-06-22	('e', 'f')	0.7368983957219252	model	2.0	Model predictions
59	59	gr41rd51	2012-06-22	('e', 'f')	0.732409381663113	model	3.0	Model predictions
60	60	gr41rd51	2012-06-22	('e', 'f')	0.7358288770053476	model	4.0	Model predictions
61	61	gr41rd51	2012-06-22	('e', 'f')	0.7353255069370331	model	5.0	Model predictions
62	62	gr41rd51	2012-06-22	('e', 'f')	0.7329787234042554	model	6.0	Model predictions
63	63	gr41rd51	2012-06-22	('e', 'f')	0.7361111111111112	model	7.0	Model predictions
64	64	gr41rd51	2012-06-22	('e', 'f')	0.7368983957219252	model	8.0	Model predictions
65	65	gr41rd51	2012-06-22	('e', 'f')	0.7336898395721925	model	9.0	Model predictions
66	66	gr41rd51	2012-06-23	('e', 'f')	0.7349759615384616	ground_truth		Ground truth
67	67	gr41rd51	2012-06-23	('e', 'f')	0.7263593380614657	model	0.0	Model predictions
68	68	gr41rd51	2012-06-23	('e', 'f')	0.7229411764705881	model	1.0	Model predictions
69	69	gr41rd51	2012-06-23	('e', 'f')	0.7351707609346915	model	2.0	Model predictions
70	70	gr41rd51	2012-06-23	('e', 'f')	0.7249114521841795	model	3.0	Model predictions
71	71	gr41rd51	2012-06-23	('e', 'f')	0.7350478468899522	model	4.0	Model predictions
72	72	gr41rd51	2012-06-23	('e', 'f')	0.7363690832834032	model	5.0	Model predictions
73	73	gr41rd51	2012-06-23	('e', 'f')	0.7346084877465631	model	6.0	Model predictions
74	74	gr41rd51	2012-06-23	('e', 'f')	0.7326968973747017	model	7.0	Model predictions
75	75	gr41rd51	2012-06-23	('e', 'f')	0.7313877307921381	model	8.0	Model predictions
76	76	gr41rd51	2012-06-23	('e', 'f')	0.7306317044100119	model	9.0	Model predictions
77	77	gr41rd51	2012-06-20	('e', 'i')	0.2234848484848484	ground_truth		Ground truth
78	78	gr41rd51	2012-06-20	('e', 'i')	0.2045454545454545	model	0.0	Model predictions
79	79	gr41rd51	2012-06-20	('e', 'i')	0.2322097378277153	model	1.0	Model predictions
80	80	gr41rd51	2012-06-20	('e', 'i')	0.2243346007604562	model	2.0	Model predictions
81	81	gr41rd51	2012-06-20	('e', 'i')	0.2226415094339622	model	3.0	Model predictions
82	82	gr41rd51	2012-06-20	('e', 'i')	0.2234848484848484	model	4.0	Model predictions
83	83	gr41rd51	2012-06-20	('e', 'i')	0.2159090909090909	model	5.0	Model predictions
84	84	gr41rd51	2012-06-20	('e', 'i')	0.2196969696969697	model	6.0	Model predictions
85	85	gr41rd51	2012-06-20	('e', 'i')	0.2226415094339622	model	7.0	Model predictions
86	86	gr41rd51	2012-06-20	('e', 'i')	0.230188679245283	model	8.0	Model predictions
87	87	gr41rd51	2012-06-20	('e', 'i')	0.2319391634980988	model	9.0	Model predictions
88	88	gr41rd51	2012-06-22	('e', 'i')	0.264050901378579	ground_truth		Ground truth
89	89	gr41rd51	2012-06-22	('e', 'i')	0.2403846153846154	model	0.0	Model predictions
90	90	gr41rd51	2012-06-22	('e', 'i')	0.2657417289220918	model	1.0	Model predictions
91	91	gr41rd51	2012-06-22	('e', 'i')	0.2609625668449198	model	2.0	Model predictions
92	92	gr41rd51	2012-06-22	('e', 'i')	0.2590618336886993	model	3.0	Model predictions
93	93	gr41rd51	2012-06-22	('e', 'i')	0.2609625668449198	model	4.0	Model predictions
94	94	gr41rd51	2012-06-22	('e', 'i')	0.2572038420490928	model	5.0	Model predictions
95	95	gr41rd51	2012-06-22	('e', 'i')	0.2617021276595745	model	6.0	Model predictions
96	96	gr41rd51	2012-06-22	('e', 'i')	0.2617521367521367	model	7.0	Model predictions
97	97	gr41rd51	2012-06-22	('e', 'i')	0.2609625668449198	model	8.0	Model predictions
98	98	gr41rd51	2012-06-22	('e', 'i')	0.2641711229946524	model	9.0	Model predictions
99	99	gr41rd51	2012-06-23	('e', 'i')	0.2626201923076923	ground_truth		Ground truth
100	100	gr41rd51	2012-06-23	('e', 'i')	0.2476359338061465	model	0.0	Model predictions
101	101	gr41rd51	2012-06-23	('e', 'i')	0.2694117647058823	model	1.0	Model predictions
102	102	gr41rd51	2012-06-23	('e', 'i')	0.2594367884961054	model	2.0	Model predictions
103	103	gr41rd51	2012-06-23	('e', 'i')	0.2650531286894923	model	3.0	Model predictions
104	104	gr41rd51	2012-06-23	('e', 'i')	0.2577751196172249	model	4.0	Model predictions
105	105	gr41rd51	2012-06-23	('e', 'i')	0.2540443379269023	model	5.0	Model predictions
106	106	gr41rd51	2012-06-23	('e', 'i')	0.2546323968918111	model	6.0	Model predictions
107	107	gr41rd51	2012-06-23	('e', 'i')	0.2583532219570406	model	7.0	Model predictions
108	108	gr41rd51	2012-06-23	('e', 'i')	0.2632519356759976	model	8.0	Model predictions
109	109	gr41rd51	2012-06-23	('e', 'i')	0.266984505363528	model	9.0	Model predictions
