# Supplementary material for: Automated annotation of birdsong with a neural network that segments spectrograms
Source: eLife. 2022 Jan 20;11:e63853. doi: 10.7554/eLife.63853 (PMC8860439; doi:10.7554/eLife.63853)
Supplement: Figure 8—source data 1. [file elife-63853-fig8-data1.csv]

log_10(p_min)	test_set_likelihood for data set of 250 sec	test_set_likelihood for data set of 500 sec	test_set_likelihood for data set of 1000 sec	test_set_likelihood for data set of 2000 sec	test_set_likelihood for data set of 4000 sec
-4	5.4147	4.8966	3.5672	2.6511	2.0294
-3.9	5.2972	4.7611	3.3755	2.5478	1.9825
-3.8	5.1685	4.6125	3.1965	2.4504	1.9383
-3.7	5.0325	4.4556	3.0256	2.3567	1.8959
-3.6	4.8442	4.2382	2.9132	2.2905	1.8662
-3.5	4.6559	4.0209	2.8009	2.2242	1.8365
-3.4	4.4676	3.8036	2.6886	2.1579	1.8068
-3.3	4.2793	3.5862	2.5763	2.0916	1.7771
-3.2	4.091	3.3689	2.464	2.0253	1.7474
-3.1	3.9027	3.1516	2.3516	1.959	1.7177
-3	3.7197	2.9724	2.2596	1.9068	1.6957
-2.9	3.5447	2.8503	2.1979	1.8755	1.6855
-2.8	3.3751	2.7664	2.1566	1.8582	1.683
-2.7	3.2235	2.686	2.1211	1.8447	1.6821
-2.6	3.1016	2.6114	2.095	1.8369	1.6839
-2.5	3.0115	2.5432	2.0783	1.8326	1.6889
-2.4	2.9288	2.488	2.0711	1.8382	1.7034
-2.3	2.8625	2.4554	2.0782	1.8544	1.728
-2.2	2.8156	2.4367	2.0974	1.8811	1.7596
-2.1	2.7814	2.425	2.124	1.9215	1.8059
-2	2.7628	2.436	2.1692	1.9887	1.8798
-1.9	2.7769	2.4783	2.2384	2.0759	1.9748
-1.8	2.8157	2.5363	2.3221	2.171	2.0754
-1.7	2.8726	2.6149	2.424	2.2864	2.1978
-1.6	2.9568	2.7246	2.5534	2.4321	2.3528
-1.5	3.0595	2.8552	2.7014	2.5984	2.53
-1.4	3.1623	2.986	2.8495	2.7648	2.7072
-1.3	3.265	3.1167	2.9976	2.9312	2.8845
